# Supplementary material for: NUP98::Nsd1 and FLT3-ITD collaborate to generate acute myeloid leukemia
Source: Leukemia. 2023 May 5;37(7):1545–8. doi: 10.1038/s41375-023-01913-0 (PMC10317830; doi:10.1038/s41375-023-01913-0)
Supplement: Supplementary file 3 — Supp Table 1 [file 41375_2023_1913_MOESM3_ESM.xlsx]

## Sheet: Table S1
Supplemental Table S1. CBC and immunophenotype of leukemic cells
					Immunophenotype of leukemic cells			CBC
genotype	ID	strain	Age(Days)	Diagnosis	Bone marrow	Spleen	Thymus	WBC (K/uL)	Hb (g/dL)	MCV (fL)	PLT (K/uL)
NUP98-NSD1	A10	C57BL/6	232	AML	Mac-1+/Gr-1+	Mac-1+/Gr-1+	Mac-1+/Gr-1+	67.12	13.6	54	885
NUP98-NSD1	I8	C57BL/6	181	AML	Mac-1+/Gr-1+	Mac-1+/Gr-1+	Mac-1+/Gr-1+	118.46	11	53.6	628
NUP98-NSD1	MT1502	FVB/NJ	230	AML	Mac-1+/Gr-1+	Mac-1+/Gr-1+		83.92	7.6	70.2	870
