# Supplementary material for: NUP98::Nsd1 and FLT3-ITD collaborate to generate acute myeloid leukemia
Source: Leukemia. 2023 May 5;37(7):1545–8. doi: 10.1038/s41375-023-01913-0 (PMC10317830; doi:10.1038/s41375-023-01913-0)
Supplement: Supplementary file 4 — Supp Table 2 [file 41375_2023_1913_MOESM4_ESM.xlsx]

## Sheet: Table S2
Supplemental Table S2. Immunophenotype and CBC of leukemic mice
				Immunophenotype of leukemic cells			CBC
Genotype	ID	Age (Days)	Diagnosis	Bone marrow	Spleen	Thymus	WBC (K/uL)	Hb (g/dL)	MCV (fL)	PLT (K/uL)
NUP98-NSD1/FLT3-ITD	K622	369	AML	Mac-1+/Gr-1+	Mac-1+/Gr-1+		42.14	5.4	58.7	233
NUP98-NSD1/FLT3-ITD	K628	516	AML	Mac-1+/Gr-1+	Mac-1+/Gr-1+/B220het		8.02	10.9	52.8	826
NUP98-NSD1/FLT3-ITD	K642	579	AML	Mac-1+/Gr-1+	Mac-1+/Gr-1+/B220het		9.12	10.9	48.6	1326
NUP98-NSD1/FLT3-ITD	K682	429	AML	Mac-1+/Gr-1+	Mac-1+/Gr-1+		8.68	11.1	49.2	603
NUP98-NSD1/FLT3-ITD	K693	551	AML	Mac-1+/Gr-1+	Mac-1+/Gr-1+	Mac-1+/Gr-1+	65.88	9	68.9	407
NUP98-NSD1/FLT3-ITD	K704	606	AML	Mac-1+/Gr-1+	Mac-1+/Gr-1+		53.8	11.1	61.9	882
NUP98-NSD1/FLT3-ITD	K717	546	pre-T LBL	CD8+/CD4-/Gr1+	CD8+/CD4-/Gr1+	CD8+/CD4-/Gr1+	NA
NUP98-NSD1/FLT3-ITD	K731	410	AML	Mac-1+/Gr-1+	Mac-1+/Gr-1+	Mac-1+/Gr-1+	NA
NUP98-NSD1/FLT3-ITD	K758	413	AML	Mac-1+/Gr-1+	Mac-1+/Gr-1+		50.02	11.6	59.6	1002
NUP98-NSD1/FLT3-ITD	K726	563	AML	Mac-1+/Gr-1+			11.84	10.6	69.9	930
NUP98-NSD1/FLT3-ITD	K742	528	AML	Mac-1+/Gr-1+			11.94	8.5	47.9	724
NUP98-NSD1/FLT3-ITD	K747	470	AML	Mac-1+/Gr-1+			46.18	12.6	67.2	577
NUP98-NSD1/FLT3-ITD	K782	384	pre-T LBL			CD8-/CD4+	12.86	6.8	60.3	548
NUP98-NSD1/FLT3-ITD	K763	461	pre-T LBL	CD8-/CD4+	CD8-/CD4+		18.9	7.7	60.4	1305
NUP98-NSD1/FLT3-ITD	K774	457	AML	Mac-1+/Gr-1+			24.06	11.5	66.7	474
NUP98-NSD1/FLT3-ITD	K792	629	AML	Mac-1+/Gr-1+			32.1	7.4	64.8	289
NUP98-NSD1/FLT3-ITD	K793	629	AML	Mac-1+/Gr-1+			13	6.8	37.3	883
