# Supplementary material for: NUP98::Nsd1 and FLT3-ITD collaborate to generate acute myeloid leukemia
Source: Leukemia. 2023 May 5;37(7):1545–8. doi: 10.1038/s41375-023-01913-0 (PMC10317830; doi:10.1038/s41375-023-01913-0)
Supplement: Supplementary file 5 — Supp Table 3 [file 41375_2023_1913_MOESM5_ESM.xlsx]

## Sheet: Sheet1
Supplemental Table S3: Comparison of somatic oncogenic mutations
	Phenotype	AML	AML	AML	ETP-ALL	B-ALL
	Genotype	NUP98::NSD1/FLT3-ITD	CALM::AF10	NHD13	Idh2R140QNHD13	NP23
	Number of samples	13	25	22	15	11
	Strain background	C57BL/6	C57BL/6	C57BL/6, FVB/NJ	C57BL/6	C57BL/6
	Ras family gene mutations total mutations mutant genes per mouse (range)	0 0	5 0-1	8 0-1	8 0-2	0 0
	mice with Ras family gene mutation	0 (0%)	5 (20%)	8 (36.4%)	6 (40%)	0 (0%)
	Tyrosine kinase gene mutations total mutations mutant genes per mouse (range)	0 0	8 0-1	0 0	6 0-2	10 0-2
	mice with Tyrosine kinase gene mutation	0 (0%)	8 (32%)	0 (0%)	4 (26.7%)	8 (72.7%)
	References	This study	Goldberg et al. Genes Chromosomes Cancer 2017	Slape et al. Blood 2008	Goldberg et al. Cancer Res 2021	Gough et al. Blood Adv. 2017.
