# Supplementary material for: NUP98::Nsd1 and FLT3-ITD collaborate to generate acute myeloid leukemia
Source: Leukemia. 2023 May 5;37(7):1545–8. doi: 10.1038/s41375-023-01913-0 (PMC10317830; doi:10.1038/s41375-023-01913-0)
Supplement: Supplementary file 6 — Supp Table 4 [file 41375_2023_1913_MOESM6_ESM.xlsx]

## Sheet: DSeq2_Normalized_GM10_count
		Supplemental Table S4. Normalized DeSeq2 transcript counts for NUP98-NSD1/Flt3-ITD AML (n=7), unfractionated purified WT BM (n=4), and WT Lineage negative BM (n=4).
Chromosome	Start	Stop	Length	Strand	Gene Symbol	gene_biotype	gene_id	gene_name	gene_source	gene_version	transcript_source	10_K682_S5	11_K704_S21	13_K742_S7	4_K747_S16	6_K762_S3	7_K774_S18	9_K628_S20	24_WT_whole_BM_S11	25_WT_whole_BM_S4	26_WT_whole_BM_S6	27_WT_whole_BM_S30	28_WT_Lineage_neg_S12	29_WT_Lineage_neg_S8	30_WT_Lineage_neg_S31	31_WT_Lineage_neg_S13
3	108014596	108053463	38867	-	ENSMUSG00000000001	protein_coding	ENSMUSG00000000001	Gnai3	ensembl_havana	5	ensembl_havana	3662.09	4487.77	3610.49	5086.46	4859.42	4662.08	6239.73	1775.27	4624.12	4018.73	3529.56	2672.23	4514.87	3972.27	3427.64
16	18599197	18630738	31541	-	ENSMUSG00000000028	protein_coding	ENSMUSG00000000028	Cdc45	ensembl_havana	16	ensembl_havana | havana	905.397	452.208	951.414	1056.18	1171.05	739.981	969.548	479.269	639.151	808.754	754.48	1332.49	1198.57	1004.75	1154.51
X	159865521	160041210	175689	+	ENSMUSG00000000037	protein_coding	ENSMUSG00000000037	Scml2	ensembl_havana	18	ensembl | havana	29.2427	15.9314	23.6587	61.3509	20.9777	43.1475	31.8094	24.2327	34.8383	45.9164	24.5582	153.399	163.04	167.458	170.991
11	121128079	121146683	18604	+	ENSMUSG00000000056	protein_coding	ENSMUSG00000000056	Narf	ensembl_havana	8	ensembl_havana | havana	1377.78	1323.54	1379.81	1526.22	1768.3	2472.35	2094.33	1261	2481.56	2377.22	2750.52	1238.08	1297.27	1175.73	1193.02
6	17281184	17289115	7931	+	ENSMUSG00000000058	protein_coding	ENSMUSG00000000058	Cav2	ensembl_havana	7	ensembl_havana | havana	105.724	126.226	66.7514	132.14	54.2952	98.1605	153.957	31.4128	52.2575	57.3956	45.0234	41.7535	33.4892	39.661	33.9371
13	5911481	5920394	8913	+	ENSMUSG00000000078	protein_coding	ENSMUSG00000000078	Klf6	ensembl_havana	8	ensembl_havana | havana	6010.42	5813.75	5705.12	5634.8	8831.59	7123.72	7407.83	2440.32	5040.81	4155.45	4174.89	3486.39	2255.24	3172.91	2816.1
4	120262478	120387384	124906	+	ENSMUSG00000000085	protein_coding	ENSMUSG00000000085	Scmh1	ensembl_havana	17	ensembl | havana	220.445	276.962	321.927	288.821	119.696	289.088	318.094	74.4932	162.132	158.62	204.652	475.628	274.964	355.187	375.918
9	57428557	57439710	11153	+	ENSMUSG00000000088	protein_coding	ENSMUSG00000000088	Cox5a	ensembl_havana	8	ensembl_havana | havana	1592.5	1087.94	1683.7	1291.94	1418.73	1102.15	1544.54	343.746	854.828	750.287	701.218	1452.28	1882.29	1429.7	1549.33
11	95459644	95478562	18918	-	ENSMUSG00000000120	protein_coding	ENSMUSG00000000120	Ngfr	ensembl_havana	7	ensembl_havana	186.703	355.394	158.006	160.456	27.1476	203.872	132.327	10.7701	20.099	17.7404	13.6434	12.7076	4.40647	2.64407	6.52636
17	64170057	64446492	276435	+	ENSMUSG00000000127	protein_coding	ENSMUSG00000000127	Fer	ensembl_havana	16	ensembl_havana | havana	114.721	85.7847	70.9761	131.196	176.46	126.206	139.961	105.906	146.053	148.185	159.628	192.429	157.752	195.661	227.117
7	125700887	125799674	98787	-	ENSMUSG00000000131	protein_coding	ENSMUSG00000000131	Xpo6	ensembl_havana	16	ensembl_havana | havana	2563.23	2289.23	2578.78	2571.1	2996.09	3071.02	3300.55	924.431	1862.51	1614.38	1860.97	2479.81	2405.94	2553.28	2487.84
X	7628799	7641442	12643	+	ENSMUSG00000000134	protein_coding	ENSMUSG00000000134	Tfe3	ensembl_havana	18	ensembl_havana | havana	1121.34	1332.11	1192.23	1171.33	1045.18	1486.43	1908.57	340.155	834.781	693.964	755.847	692.565	542.878	615.187	594.552
11	108811175	108841610	30435	+	ENSMUSG00000000142	protein_coding	ENSMUSG00000000142	Axin2	ensembl_havana	16	ensembl_havana | havana	32.6169	60.0493	18.589	19.8211	55.5292	19.4164	25.4475	43.9779	64.3169	67.8311	98.2328	134.337	84.6043	83.7288	122.696
5	140690766	140705135	14369	+	ENSMUSG00000000148	protein_coding	ENSMUSG00000000148	Brat1	ensembl_havana	18	ensembl_havana | havana	567.982	756.132	641.318	683.355	510.869	704.384	698.534	124.754	272.007	306.805	357.459	780.608	835.465	789.694	629.794
5	140744163	140816187	72024	-	ENSMUSG00000000149	protein_coding	ENSMUSG00000000149	Gna12	ensembl_havana	11	ensembl_havana | havana	1513.09	1657.8	1707.02	2135.15	1524.88	1629.73	1870.39	544.572	1434.49	1306.23	1160.27	2923.91	3239.61	2755.64	2519.98
7	143027473	143053072	25599	+	ENSMUSG00000000154	protein_coding	ENSMUSG00000000154	Slc22a18	ensembl_havana	17	ensembl_havana | havana	39.3652	49.0198	27.8835	37.7544	12.3398	20.495	20.358	2.69252	10.7195	11.4791	2.72869	11.7999	31.7266	34.3729	22.1896
16	96223488	96244820	21332	-	ENSMUSG00000000157	protein_coding	ENSMUSG00000000157	Itgb2l	ensembl_havana	17	ensembl_havana | havana	3371.97	6780.7	4327.86	3655.61	9808.71	5642.55	12244.9	4048.62	8776.85	6843.46	5608.78	202.414	1.76259	69.6272	26.1054
9	50545933	50571081	25148	-	ENSMUSG00000000168	protein_coding	ENSMUSG00000000168	Dlat	ensembl_havana	11	ensembl_havana | havana	764.809	665.444	683.568	916.488	903.275	710.855	866.49	253.995	514.535	626.134	422.947	1029.32	1728.22	1374.92	1397.29
9	50507657	50515113	7456	-	ENSMUSG00000000171	protein_coding	ENSMUSG00000000171	Sdhd	ensembl_havana	6	ensembl_havana	2149.34	1851.72	2426.71	2232.23	2117.51	1968.6	2487.49	606.716	1352	1358.71	1225.18	2210.21	3562.19	2623.8	2616.42
6	127102125	127129157	27032	-	ENSMUSG00000000184	protein_coding	ENSMUSG00000000184	Ccnd2	ensembl_havana	13	ensembl_havana | havana	2970.39	2049.03	4070.15	2957.99	1925.01	2232.88	1663	415.3	1053.19	955.897	1285.21	5521.95	4419.68	4504.61	4333.51
2	31042328	31108788	66460	+	ENSMUSG00000000194	protein_coding	ENSMUSG00000000194	Gpr107	ensembl_havana	14	ensembl_havana | havana	1277.57	1273.2	992.82	1235.51	1018.88	1344.81	1501.41	404.776	754.383	737.795	827.797	654.441	643.345	629.288	637.292
11	83066012	83081043	15031	+	ENSMUSG00000000204	protein_coding	ENSMUSG00000000204	Slfn4	ensembl_havana	17	ensembl | ensembl_havana | havana	12490.4	3629.93	5805.26	10153.9	13363.3	14183.7	18759.4	3864.62	10015.6	11195	8471.03	306.93	42.3022	123.39	108.338
X	133305300	133357323	52023	+	ENSMUSG00000000223	protein_coding	ENSMUSG00000000223	Drp2	ensembl_havana	14	ensembl_havana | havana	14.6213	19.6079	17.744	15.1018	17.2758	16.1803	5.0895	17.0527	37.5182	27.1324	28.6512	20.8768	8.81295	14.1017	13.7054
7	142558783	142573382	14599	+	ENSMUSG00000000244	protein_coding	ENSMUSG00000000244	Tspan32	ensembl_havana	18	ensembl_havana | havana	826.667	1340.45	919.948	1142.07	1536.31	749.687	1086.61	621.723	1239.44	1201.05	1081.52	1953.34	2094.74	2195.45	1747.1
13	45660920	45707277	46357	+	ENSMUSG00000000253	protein_coding	ENSMUSG00000000253	Gmpr	ensembl_havana	14	ensembl_havana | havana	14.6213	35.5394	43.9376	69.8456	43.192	33.7804	72.5254	31.4351	54.9374	69.9182	45.0234	274.121	274.964	254.905	206.356
X	139565348	139668465	103117	+	ENSMUSG00000000266	protein_coding	ENSMUSG00000000266	Mid2	ensembl_havana	12	ensembl | havana	11.2472	11.0295	17.744	3.77544	85.1448	8.62949	5.0895	17.0527	13.3994	25.0453	23.1939	4.53843	5.28777	2.64407	7.83163
11	88890202	88911120	20918	+	ENSMUSG00000000275	protein_coding	ENSMUSG00000000275	Trim25	ensembl_havana	17	ensembl_havana | havana	2693.72	1529.41	3002.95	2201.12	1499.29	3622.23	3060.11	512.476	1243.46	1033.13	1517.16	2180.27	1763.45	1421.64	1702.05
11	88926005	88957677	31672	-	ENSMUSG00000000276	protein_coding	ENSMUSG00000000276	Dgke	ensembl_havana	12	ensembl | havana	264.309	354.168	304.183	273.719	172.757	214.659	170.498	113.086	91.1157	128.357	91.4111	253.244	275.845	331.391	343.939
11	88814846	88846292	31446	-	ENSMUSG00000000278	protein_coding	ENSMUSG00000000278	Scpep1	ensembl_havana	11	ensembl_havana	3290.93	2189.96	2488.39	2593.73	1850.97	3128.19	2252.11	283.613	502.476	494.645	467.97	513.75	577.248	363.119	436.613
11	74721746	74736552	14806	+	ENSMUSG00000000282	protein_coding	ENSMUSG00000000282	Mnt	ensembl_havana	13	ensembl_havana | havana	716.446	745.101	768.063	572.923	483.721	673.1	748.157	165.142	274.687	295.326	398.389	965.778	425.665	625.764	631.752
10	77366086	77401543	35457	+	ENSMUSG00000000290	protein_coding	ENSMUSG00000000290	Itgb2	ensembl_havana	14	ensembl_havana | havana	15943.7	19922.3	13544.8	13919.5	17560.8	16565	24578.3	7038.1	13768.1	12088.5	11061.5	2539.73	1085.75	1366.12	1240.67
10	31189379	31204201	14822	+	ENSMUSG00000000295	protein_coding	ENSMUSG00000000295	Hddc2	ensembl_havana	14	ensembl_havana | havana	231.692	196.079	223.068	214.256	207.309	170.433	136.144	43.9779	89.7757	97.0507	68.2172	320.413	356.043	324.339	283.244
11	59861440	59937316	75876	-	ENSMUSG00000000301	protein_coding	ENSMUSG00000000301	Pemt	ensembl_havana	17	ensembl_havana | havana	13.4966	20.8334	16.0541	8.49474	23.4457	31.2819	45.8055	10.7701	30.8185	19.8276	20.4652	66.261	89.0108	85.4915	54.1688
8	107329983	107396879	66896	+	ENSMUSG00000000303	protein_coding	ENSMUSG00000000303	Cdh1	ensembl_havana	13	ensembl | ensembl_havana | havana	197.951	129.903	197.719	104.768	62.9331	174.747	96.7006	77.1857	156.773	137.749	170.543	1149.13	558.742	821.43	600.427
11	70047023	70061661	14638	+	ENSMUSG00000000318	protein_coding	ENSMUSG00000000318	Clec10a	ensembl_havana	17	ensembl_havana | havana	1719.02	3123.79	1472.08	1562.96	499.381	1894.44	1110.8	114.881	172.119	191.574	152.183	157.102	128.319	89.2708	134.443
11	70132283	70146180	13897	-	ENSMUSG00000000320	protein_coding	ENSMUSG00000000320	Alox12	ensembl_havana	11	ensembl_havana | havana	6.74831	19.6079	9.29449	12.2702	11.1058	11.8656	3.81713	49.363	96.4754	85.5715	73.6746	6.3538	14.982	22.0339	16.3159
16	18225636	18245603	19967	-	ENSMUSG00000000326	protein_coding	ENSMUSG00000000326	Comt	ensembl_havana	14	ensembl | ensembl_havana | havana	1067.36	928.854	884.397	1148.47	1008.14	1061.36	1241.75	452.835	838.221	924.082	844.447	1314.5	1305.93	987.98	1262.01
3	116282612	116301858	19246	-	ENSMUSG00000000339	protein_coding	ENSMUSG00000000339	Rtca	ensembl_havana	15	ensembl_havana | havana	498.251	573.533	527.251	543.663	404.746	463.835	508.951	95.1359	251.908	255.671	229.21	420.259	616.025	508.542	467.287
3	116306719	116343631	36912	+	ENSMUSG00000000340	protein_coding	ENSMUSG00000000340	Dbt	ensembl_havana	11	ensembl_havana | havana	328.418	427.698	422.477	399.253	301.092	328.999	332.09	127.446	223.769	182.622	162.357	357.628	516.439	381.627	409.203
15	100513230	100518643	5413	+	ENSMUSG00000000346	protein_coding	ENSMUSG00000000346	Dazap2	ensembl_havana	10	ensembl_havana | havana	4985.27	5475.35	4419.26	5737.53	4993.4	5232.38	6837.79	1661.9	3979.02	3514.38	3245.43	1872.38	3580.04	3136.62	2606.93
X	37689455	37702304	12849	+	ENSMUSG00000000355	protein_coding	ENSMUSG00000000355	Mcts1	ensembl_havana	14	ensembl_havana | havana	365.533	412.992	304.183	447.39	445.467	442.262	449.149	110.393	272.007	251.497	199.194	164.291	616.906	439.796	343.287
2	152468871	152477119	8248	+	ENSMUSG00000000359	protein_coding	ENSMUSG00000000359	Rem1	ensembl_havana	4	ensembl_havana | havana	164.209	104.167	181.665	137.803	50.5933	165.039	187.039	13.4626	22.7789	32.3502	28.6512	23.5998	0.881295	3.52543	7.83163
10	78022559	78080476	57917	-	ENSMUSG00000000374	protein_coding	ENSMUSG00000000374	Trappc10	ensembl_havana	9	ensembl_havana | havana	2022.25	2216.92	2054.94	2392.68	2354.44	2232.87	2557.49	1057.26	2210.9	2307.3	2307.11	2412.63	2120.39	1997.15	2145.23
11	6496887	6546745	49858	+	ENSMUSG00000000378	protein_coding	ENSMUSG00000000378	Ccm2	ensembl_havana	16	ensembl | ensembl_havana | havana	1227.07	1449.76	1095.07	1359.17	1190.8	1426.02	1436.52	568.123	1183.16	1076.95	1061.46	698.919	963.257	879.594	622.615
11	6565598	6576068	10470	-	ENSMUSG00000000384	protein_coding	ENSMUSG00000000384	Tbrg4	ensembl_havana	16	ensembl | ensembl_havana | havana	627.593	738.973	836.504	775.852	741.622	633.188	818.137	261.175	406.001	496.732	428.404	2209.31	1575.76	1453.35	1306.57
16	97365882	97412396	46514	-	ENSMUSG00000000385	protein_coding	ENSMUSG00000000385	Tmprss2	ensembl_havana	9	ensembl_havana | havana	48.3629	12.255	32.9532	29.2597	6.16991	51.777	6.36188	15.2576	29.4786	21.9147	13.6434	3.63074	2.64388	3.52543	1.95791
16	97248235	97264108	15873	-	ENSMUSG00000000386	polymorphic_pseudogene	ENSMUSG00000000386	Mx1	ensembl_havana	17	ensembl | ensembl_havana | havana	1461.09	763.484	941.79	1374.69	204.841	1674.74	603.106	116.676	215.469	216.016	166.45	72.6148	79.3165	52	92.0216
2	62331287	62404420	73133	-	ENSMUSG00000000392	protein_coding	ENSMUSG00000000392	Fap	ensembl_havana	18	ensembl_havana | havana	13.4966	15.9314	12.6743	16.9895	8.63788	34.518	6.36188	22.4377	21.439	18.784	20.4652	8.16917	7.93165	3.52543	5.87372
6	126798684	126826100	27416	-	ENSMUSG00000000399	protein_coding	ENSMUSG00000000399	Ndufa9	ensembl_havana	11	ensembl_havana | havana	1216.95	1000.01	929.442	1182.65	1015.57	944.929	1211.3	323.103	699.448	651.177	514.357	924.927	1694.75	1292.94	1332.03
4	129442137	129467435	25298	-	ENSMUSG00000000409	protein_coding	ENSMUSG00000000409	Lck	ensembl_havana	15	ensembl | ensembl_havana | havana	555.612	740.197	264.471	198.21	702.135	151.016	235.39	117.574	206.35	220.19	177.365	158.845	72.2662	95.1864	122.696
18	24338401	24419876	81475	+	ENSMUSG00000000420	protein_coding	ENSMUSG00000000420	Galnt1	ensembl_havana	16	ensembl | ensembl_havana | havana	2917.5	2904.74	2637.94	4450.38	2983.72	3308.3	3217.93	1446.77	2917.06	2942.79	2777.82	3972.99	5812.29	5044.86	4704.84
6	115578863	115599586	20723	+	ENSMUSG00000000439	protein_coding	ENSMUSG00000000439	Mkrn2	ensembl_havana	10	ensembl_havana | havana	1010.1	1226.72	1103.47	1161.92	941.904	1053.47	1116.03	331.413	710.106	639.001	597.202	883.816	1097.11	1083.75	1040.52
6	115337912	115467361	129449	+	ENSMUSG00000000440	protein_coding	ENSMUSG00000000440	Pparg	ensembl_havana	13	ensembl_havana | havana	109.098	256.129	100.55	120.814	104.889	98.1605	72.5254	35.9003	52.2575	63.6569	49.1164	8.16917	11.4568	4.40678	7.17899
6	115595028	115653597	58569	-	ENSMUSG00000000441	protein_coding	ENSMUSG00000000441	Raf1	ensembl_havana	18	ensembl_havana | havana	2743.62	2820.93	2601.62	2836.22	3316.82	3113.46	3593.36	1324.94	2789.94	2151.48	2229.92	2122.18	1983.53	1854.1	1759.41
7	126813619	126832303	18684	-	ENSMUSG00000000486	protein_coding	ENSMUSG00000000486	Septin1	ensembl_havana	14	ensembl_havana | havana	1169.71	1178.92	1453.32	719.223	1352.44	736.743	961.917	635.436	1022.37	841.105	834.979	1310.7	495.289	579.052	525.372
15	79880075	79899179	19104	-	ENSMUSG00000000489	protein_coding	ENSMUSG00000000489	Pdgfb	ensembl_havana	8	ensembl_havana | havana	46.1135	291.668	59.1468	57.5754	33.3175	49.6196	49.6227	29.6178	34.8383	57.3955	28.6512	19.9691	21.1511	18.5085	24.1475
15	101026403	101043218	16815	+	ENSMUSG00000000530	protein_coding	ENSMUSG00000000530	Acvrl1	ensembl_havana	17	ensembl_havana | havana	1083.11	1066.18	820.455	833.431	2106.42	1504.77	3429.06	513.375	1479.29	996.592	877.276	112.553	47.5899	32.6102	45.0319
15	101122069	101130638	8569	+	ENSMUSG00000000531	protein_coding	ENSMUSG00000000531	Tamalin	ensembl_havana	6	ensembl_havana	23.6191	41.6669	51.5422	35.8667	19.7437	16.1803	15.2685	8.07757	2.67987	22.9582	12.2791	96.2147	44.946	38.7797	54.1688
15	101071948	101111566	39618	+	ENSMUSG00000000532	protein_coding	ENSMUSG00000000532	Acvr1b	ensembl_havana	12	ensembl_havana	844.664	841.916	880.442	936.309	1053.82	1059.27	1563.75	272.843	683.367	538.475	577.118	834.163	722.662	713.899	621.309
11	60117540	60243732	126192	-	ENSMUSG00000000538	protein_coding	ENSMUSG00000000538	Tom1l2	ensembl_havana	19	ensembl | ensembl_havana | havana	426.268	419.119	500.213	348.284	274.337	417.451	381.713	76.2882	172.852	169.033	231.939	501.95	249.406	367.526	360.255
15	103222322	103248521	26199	-	ENSMUSG00000000552	protein_coding	ENSMUSG00000000552	Zfp385a	ensembl_havana	11	ensembl_havana | havana	634.342	571.083	779.043	452.11	278.88	641.821	662.907	61.9281	117.914	101.225	121.427	690.753	206.223	231.797	272.149
15	103252713	103275191	22478	-	ENSMUSG00000000555	protein_coding	ENSMUSG00000000555	Itga5	ensembl_havana	9	ensembl_havana | havana	651.21	631.128	980.155	564.43	435.595	799.307	899.574	70.0056	242.528	235.843	218.295	1196.33	716.488	820.544	921.516
3	105866685	105877354	10669	+	ENSMUSG00000000561	protein_coding	ENSMUSG00000000561	Wdr77	ensembl_havana	15	ensembl_havana | havana	950.888	873.177	1041.79	1363.55	1040.89	1227.61	1254.18	383.23	789.821	786.307	852.351	1931.55	2623.96	2071.48	2027.93
3	105778174	105816243	38069	+	ENSMUSG00000000562	protein_coding	ENSMUSG00000000562	Adora3	ensembl_havana	6	ensembl_havana | havana	100.099	181.331	90.701	102.701	92.7875	121.844	140.607	65.4759	144.735	152.358	130.388	31.9919	36.6593	33.5294	38.4916
3	105850014	105867416	17402	-	ENSMUSG00000000563	protein_coding	ENSMUSG00000000563	Atp5pb	ensembl_havana	18	ensembl_havana | havana	5203.85	3458.93	4584.39	3841.33	5143.61	3772.4	4919.17	1726.12	3247.27	2920.97	2610.75	3780.84	4648.51	3604.14	4326.69
5	100103794	100126798	23004	-	ENSMUSG00000000568	protein_coding	ENSMUSG00000000568	Hnrnpd	ensembl_havana	16	ensembl_havana | havana	2220.56	1363.93	2216.18	1732.63	1435.58	1444.01	1953.79	647.818	953.185	1068.24	1006.26	4247.35	2348	1999.52	2390.36
17	6869070	6877174	8104	+	ENSMUSG00000000579	protein_coding	ENSMUSG00000000579	Dynlt1c	ensembl_havana	15	ensembl_havana | havana	256.982	419.362	335.674	354.76	178.267	546.127	486.071	98.9372	279.208	171.786	201.056	55.3141	171.906	178.605	127.761
11	17207579	17219177	11598	+	ENSMUSG00000000581	protein_coding	ENSMUSG00000000581	C1d	ensembl_havana	9	ensembl_havana | havana	794.052	734.072	658.22	997.659	686.094	779.89	819.41	223.48	628.431	593.783	491.164	752.471	1071.65	884.881	652.637
11	54988941	55003856	14915	+	ENSMUSG00000000594	protein_coding	ENSMUSG00000000594	Gm2a	ensembl_havana	8	ensembl_havana	12706	21199.9	10627.8	10577.8	6778.27	11602.4	9628.07	1699.88	3223.89	2551.49	2432.63	3404.73	3867.12	2971.05	3188.13
5	3853184	3895565	42381	+	ENSMUSG00000000600	protein_coding	ENSMUSG00000000600	Krit1	ensembl_havana	16	ensembl_havana | havana	998.749	1295.35	1009.72	1178.88	851.448	1416.32	973.367	533.12	892.397	875.543	1156.96	736.132	1136.87	1275.32	1024.64
7	7285308	7303851	18543	-	ENSMUSG00000000605	protein_coding	ENSMUSG00000000605	Clcn4	ensembl_havana	10	ensembl_havana | havana	1475.58	1744.31	1162.01	1595.46	1280.87	1730.71	1535.16	550.953	946.371	915.186	1035.77	1088.03	1410.99	1303.66	1167.58
6	82888866	82916751	27885	-	ENSMUSG00000000627	protein_coding	ENSMUSG00000000627	Sema4f	ensembl_havana	16	ensembl_havana | havana	114.721	215.687	167.301	125.533	139.44	157.488	234.117	102.316	254.588	157.577	177.365	17.246	7.05036	9.69492	12.4001
6	82702006	82751436	49430	-	ENSMUSG00000000628	protein_coding	ENSMUSG00000000628	Hk2	ensembl_havana	11	ensembl_havana | havana	3557.53	2936.27	3773.53	4056.76	3096.08	3644.85	4388.43	1155.99	1892	1635.26	1650.87	3486.41	2206.8	2290.66	2041.43
11	77654072	77756807	102735	+	ENSMUSG00000000631	protein_coding	ENSMUSG00000000631	Myo18a	ensembl_havana	21	ensembl | havana	2737.57	2742.65	2397.11	3167.56	1925.02	2940.51	2614.74	871.483	1268.92	1366.01	1442.11	6242.15	3204.37	3084.75	3217.51
17	84138585	84155393	16808	-	ENSMUSG00000000673	protein_coding	ENSMUSG00000000673	Haao	ensembl_havana	10	ensembl_havana | havana	925.643	980.396	791.722	1200.59	361.557	949.242	791.418	180.399	343.024	284.891	241.489	339.474	385.126	316.407	274.76
4	133809759	133822394	12635	-	ENSMUSG00000000682	protein_coding	ENSMUSG00000000682	Cd52	ensembl_havana	8	ensembl_havana | havana	8734.57	10248.8	5082.4	7383.81	10745.5	8076.13	11858.5	3049.73	7330.79	5386.83	4877.53	474.719	730.593	527.933	595.204
11	77405947	77429434	23487	+	ENSMUSG00000000686	protein_coding	ENSMUSG00000000686	Abhd15	ensembl_havana	12	ensembl_havana | havana	921.667	584.979	1126.75	997.098	299.374	1235.67	780.08	135.267	294.167	164.814	222.394	501.161	446.259	440.797	320.756
6	83011154	83029544	18390	+	ENSMUSG00000000693	protein_coding	ENSMUSG00000000693	Loxl3	ensembl_havana	11	ensembl_havana | havana	119.426	167.624	131.386	96.3145	122.053	135.149	101.223	53.2352	85.0263	59.2233	85.8942	152.363	146.673	98.8696	126.32
17	53873889	53979749	105860	+	ENSMUSG00000000708	protein_coding	ENSMUSG00000000708	Kat2b	ensembl_havana	15	ensembl_havana | havana	1438.15	1262.7	1041.4	1329.31	1496.05	1692.62	1548.79	550.386	1190.42	1054.81	1131.85	538.054	838.507	709.924	663.966
10	128513044	128532134	19090	-	ENSMUSG00000000711	protein_coding	ENSMUSG00000000711	Rab5b	ensembl_havana	4	ensembl_havana | havana	2639.34	2825.03	2593.08	2871.91	3272.87	2808.06	3758.26	1435.46	2575.43	2107.61	2087.26	1299.7	1299.42	1162.59	1312.2
10	77877781	77899457	21676	+	ENSMUSG00000000730	protein_coding	ENSMUSG00000000730	Dnmt3l	ensembl_havana	14	ensembl_havana | havana	7.87303	17.1569	22.8138	16.9895	22.2117	23.7311	39.4437	6.28256	28.1387	26.0889	13.6434	5.44611	1.76259	1.76271	4.56845
10	77905136	77919748	14612	+	ENSMUSG00000000732	protein_coding	ENSMUSG00000000732	Icosl	ensembl_havana	10	ensembl_havana | havana	1277.68	2382.36	1117.87	1171.33	882.297	1536.05	1333.45	306.948	627.092	558.301	526.638	170.645	145.414	126.915	154.022
8	123789681	123824500	34819	+	ENSMUSG00000000738	protein_coding	ENSMUSG00000000738	Spg7	ensembl_havana	19	ensembl_havana | havana	947.014	806.377	720.745	1078.84	881.065	939.536	951.738	370.671	556.074	594.827	499.35	1490.42	1305.2	1004.75	950.238
8	123829089	123831984	2895	+	ENSMUSG00000000740	protein_coding	ENSMUSG00000000740	Rpl13	ensembl_havana	13	ensembl_havana | havana	2106.42	2582.5	2700.21	2490.96	1495.27	2579.84	2402.2	490.881	1201.04	1055.45	964.82	5489.13	3956.75	3007.62	2308.18
8	123931003	123939503	8500	-	ENSMUSG00000000743	protein_coding	ENSMUSG00000000743	Chmp1a	ensembl_havana	10	ensembl_havana | havana	1977.26	2207.9	1886.77	2031.51	1775.88	2015.31	2694.06	577.995	1375.61	1258.24	955.716	1329.76	1580.47	1255.42	1054.25
11	75188992	75239151	50159	-	ENSMUSG00000000751	protein_coding	ENSMUSG00000000751	Rpa1	ensembl_havana	14	ensembl_havana | havana	2670.08	1944.86	2713.12	3024.07	2034.82	2340.77	2654.18	1002.52	2158.62	2505.56	2107.92	5490.4	4805.6	3699.96	3642.99
11	75300595	75313528	12933	-	ENSMUSG00000000753	protein_coding	ENSMUSG00000000753	Serpinf1	ensembl_havana	16	ensembl_havana | havana	373.406	162.991	789.188	604.071	351.685	346.259	243.024	85.2633	104.515	141.924	103.69	1051.1	650.395	780.882	566.486
8	12664277	12722249	57972	-	ENSMUSG00000000759	protein_coding	ENSMUSG00000000759	Tubgcp3	ensembl_havana	15	ensembl_havana | havana	1588.1	1351.72	1377.27	1522.44	1354.91	1336.49	1594.29	648	872.299	1038.34	991.88	1631.11	1739.68	1597.91	2057.09
14	70676197	70680888	4691	-	ENSMUSG00000000776	protein_coding	ENSMUSG00000000776	Polr3d	ensembl_havana	14	ensembl_havana | havana	179.955	197.305	212.083	183.109	209.777	153.174	143.779	62.8256	88.4358	135.662	117.334	587.273	493.526	405.425	526.025
11	52143198	52174159	30961	-	ENSMUSG00000000782	protein_coding	ENSMUSG00000000782	Tcf7	ensembl_havana	17	ensembl_havana | havana	151.837	503.679	87.0303	78.3403	1505.45	87.3736	95.4282	77.1857	100.495	101.225	154.171	49.9227	69.6223	52.8814	118.127
X	13147209	13160292	13083	+	ENSMUSG00000000787	protein_coding	ENSMUSG00000000787	Ddx3x	ensembl_havana	13	ensembl_havana | havana	8318.44	8600.23	8227.33	9289.35	11213.1	7364.13	9780.64	4070.18	6695.66	6884.33	5823.02	8966.9	12785	10390.4	11498
8	71261093	71274069	12976	+	ENSMUSG00000000791	protein_coding	ENSMUSG00000000791	Il12rb1	ensembl_havana	10	ensembl_havana | havana	195.701	100.491	130.123	79.2842	658.947	56.0917	80.1597	23.3352	42.878	35.4809	17.7365	108.015	74.0288	80.2034	67.2215
11	84875268	85030988	155720	-	ENSMUSG00000000804	protein_coding	ENSMUSG00000000804	Usp32	ensembl_havana	15	ensembl_havana | havana	1549.87	1649.52	1326.58	1607.4	1664.65	1971.82	2450.6	1866.83	3647.32	3688.95	4964.91	1132.79	826.658	876.07	1216.51
6	89620970	89652512	31542	+	ENSMUSG00000000811	protein_coding	ENSMUSG00000000811	Txnrd3	ensembl_havana	15	ensembl_havana	76.4809	84.5593	121.673	100.049	57.9972	84.1376	62.3464	41.2854	45.5578	66.7876	61.3955	299.536	333.129	311.119	319.139
1	161608258	161616065	7807	-	ENSMUSG00000000817	protein_coding	ENSMUSG00000000817	Fasl	ensembl_havana	11	ensembl_havana | havana	134.966	91.9122	32.1082	46.2491	27.1476	33.4393	57.2569	8.97508	29.4786	26.0889	16.3721	1.81537	7.05036	8.81356	8.48427
2	181223896	181234597	10701	-	ENSMUSG00000000823	protein_coding	ENSMUSG00000000823	Zfp512b	ensembl_havana	17	ensembl_havana | havana	777.177	727.943	969.173	837.207	568.868	664.471	550.939	210.017	339.005	374.636	323.35	1621.11	1007.33	1151.93	1039.65
2	181162278	181196927	34649	+	ENSMUSG00000000826	protein_coding	ENSMUSG00000000826	Dnajc5	ensembl_havana	17	ensembl_havana | havana	3098.57	3602.96	3218.42	3884.99	3650.17	4008.44	4324.81	1190.99	2799.12	2628.7	2700.03	2290.99	2939.11	2555.94	2326.03
2	181138935	181159760	20825	+	ENSMUSG00000000827	protein_coding	ENSMUSG00000000827	Tpd52l2	ensembl_havana	19	ensembl_havana | havana	1273.18	996.328	1462.62	1123.19	1100.71	1257.75	1411.06	421.829	925.895	791.016	757.212	1803.57	1567.82	1329.96	1519.33
X	67722147	67761570	39423	+	ENSMUSG00000000838	protein_coding	ENSMUSG00000000838	Fmr1	ensembl_havana	18	ensembl_havana | havana	1416.02	1362.75	1288.55	1947.29	1543.01	1602.04	1906.02	798.97	1468.75	1337.84	1584.28	1345.29	2230.54	1920.47	1736.14
11	24028056	24124124	96068	+	ENSMUSG00000000861	protein_coding	ENSMUSG00000000861	Bcl11a	ensembl_havana	16	ensembl_havana | havana	2643.09	1484.03	2136.01	1695.17	515.805	2648.18	1526.85	427.214	684.707	699.182	938.67	2855.47	1929.16	2514.45	3150.26
2	154427678	154445629	17951	-	ENSMUSG00000000876	protein_coding	ENSMUSG00000000876	Pxmp4	ensembl_havana	12	ensembl_havana | havana	611.847	632.356	529.786	668.253	697.2	564.153	727.799	271.047	485.057	398.638	343.815	278.659	378.957	358.712	353.076
X	99811328	99862017	50689	+	ENSMUSG00000000881	protein_coding	ENSMUSG00000000881	Dlg3	ensembl_havana	13	ensembl_havana | havana	95.6011	117.648	106.464	96.2737	151.78	71.1933	92.8834	56.543	60.2971	59.4827	90.0467	301.351	255.575	248.543	286.507
16	18317463	18385430	67967	+	ENSMUSG00000000884	protein_coding	ENSMUSG00000000884	Gnb1l	ensembl_havana	18	ensembl_havana | havana	51.7371	56.3728	47.4192	68.9017	42.3065	55.013	53.4398	26.9252	62.2796	62.7415	39.566	159.748	191.337	190.7	153.369
10	75759056	75772331	13275	-	ENSMUSG00000000901	protein_coding	ENSMUSG00000000901	Mmp11	ensembl_havana	18	ensembl_havana | havana	17.9955	9.80397	43.9376	17.9333	2.51639	28.0459	20.358	18.8477	25.4588	32.3502	35.473	27.2306	26.4388	14.1312	16.9856
10	75732603	75757452	24849	-	ENSMUSG00000000902	protein_coding	ENSMUSG00000000902	Smarcb1	ensembl_havana	14	ensembl_havana | havana	1254.06	1013.49	1073.94	989.162	935.356	1004.26	1328.36	402.981	624.411	723.184	729.925	1907.05	1843.67	1477.15	1511.5
5	124111691	124143622	31931	+	ENSMUSG00000000915	protein_coding	ENSMUSG00000000915	Hip1r	ensembl_havana	16	ensembl_havana | havana	1386.42	1843.04	1515.03	1435.62	2775.08	1348.96	1991.15	1039.19	1756.86	1367.47	1628.9	1785.39	1314.12	1511.28	1084.92
5	135398807	135405660	6853	+	ENSMUSG00000000916	protein_coding	ENSMUSG00000000916	Nsun5	ensembl_havana	16	ensembl_havana | havana	202.546	226.946	221.467	298.295	202.292	237.037	208.946	83.8018	154.829	170.817	155.088	586.306	723.918	699.659	539.618
15	75528884	75550650	21766	-	ENSMUSG00000000934	protein_coding	ENSMUSG00000000934	Top1mt	ensembl_havana	10	ensembl_havana | havana	127.093	77.2062	117.449	97.2176	111.058	81.9802	100.518	35.9003	42.878	66.7876	36.8373	483.796	351.636	252.949	294.339
6	52208177	52217835	9658	-	ENSMUSG00000000938	protein_coding	ENSMUSG00000000938	Hoxa10	ensembl_havana	12	ensembl_havana | havana	10.1225	6.12748	25.3486	13.214	4.93593	15.1016	1.27238	14.3601	10.7195	15.6533	12.2791	29.9536	42.3022	41.4238	32.6318
14	54669069	54682822	13753	+	ENSMUSG00000000957	protein_coding	ENSMUSG00000000957	Mmp14	ensembl_havana	12	ensembl_havana | havana	51.7371	35.5394	54.077	30.2035	64.1671	51.777	49.6227	67.3131	103.175	110.617	90.0467	572.751	421.259	580.814	560.615
14	54606899	54655238	48339	-	ENSMUSG00000000958	protein_coding	ENSMUSG00000000958	Slc7a7	ensembl_havana	11	ensembl_havana | havana	493.984	425.414	280.709	268.86	518.041	350.679	620.567	62.4805	152.554	130.548	130.292	86.467	105.316	76.0931	119.804
14	54598291	54607131	8840	+	ENSMUSG00000000959	protein_coding	ENSMUSG00000000959	Oxa1l	ensembl_havana	8	ensembl_havana | havana	1057.01	1031.7	961.373	1053.49	992.358	1113.1	1218.02	231.902	483.915	468.453	449.554	872.046	1219.28	1050.28	962.917
11	83644522	83674581	30059	+	ENSMUSG00000000976	protein_coding	ENSMUSG00000000976	Heatr6	ensembl_havana	14	ensembl_havana | havana	863.788	928.926	697.087	852.305	802.089	948.165	1033.17	307.846	514.536	458.121	601.676	845.963	790.522	721.831	784.466
11	83538670	83540182	1512	-	ENSMUSG00000000982	protein_coding	ENSMUSG00000000982	Ccl3	ensembl_havana	6	ensembl_havana	67.4831	58.8238	54.077	66.0702	166.588	62.5638	31.8094	87.0583	170.172	131.488	126.884	1660.16	1039.05	1701.9	851.69
9	20940669	20941892	1223	+	ENSMUSG00000001014	protein_coding	ENSMUSG00000001014	Icam4	ensembl_havana	7	ensembl_havana | havana	12.9612	13.9448	19.1095	9.45465	6.38541	7.09814	4.64859	125.908	269.211	316.864	285.225	171.966	282.96	230.462	190.09
3	90383433	90395687	12254	+	ENSMUSG00000001016	protein_coding	ENSMUSG00000001016	Ilf2	ensembl_havana	13	ensembl_havana | havana	1526.57	1084.73	1666.03	1770.89	1681.12	1487.02	1767.89	660.59	1418.28	1359.76	1311.83	2673.62	3054.75	2724.32	2682.51
3	90406263	90416806	10543	-	ENSMUSG00000001017	protein_coding	ENSMUSG00000001017	Chtop	ensembl_havana	16	ensembl_havana | havana	2077.35	2169.12	1712.69	2673	1804.04	2668.68	2280.09	689.287	1759.33	1577.77	1668.6	1821.61	3434.36	2968.41	2318.83
3	90395333	90398341	3008	-	ENSMUSG00000001018	protein_coding	ENSMUSG00000001018	Snapin	ensembl_havana	16	ensembl_havana | havana	573.282	763.314	517.327	690.704	525.245	539.832	601.272	236.022	302.201	315.144	278.999	270.904	522.465	467.959	496.478
3	90511078	90513353	2275	+	ENSMUSG00000001020	protein_coding	ENSMUSG00000001020	S100a4	ensembl_havana	9	ensembl_havana | havana	14837	10741.6	10397	6780.65	5612.15	6918.71	8247.63	1211.63	2062.16	1672.82	1267.47	1125.53	363.975	262.644	452.929
3	90520189	90531489	11300	+	ENSMUSG00000001025	protein_coding	ENSMUSG00000001025	S100a6	ensembl_havana	9	ensembl_havana | havana	9364.75	6953.5	9931.68	8833.2	14621	8859.53	15595.2	3450.02	8473.84	6427.28	4711.09	556.411	246.763	226.509	350.466
11	106268482	106278902	10420	-	ENSMUSG00000001029	protein_coding	ENSMUSG00000001029	Icam2	ensembl_havana	16	ensembl_havana | havana	303.674	267.158	192.649	337.902	324.537	285.852	376.623	128.344	281.387	208.711	236.032	560.042	809.03	615.188	542.993
11	61379638	61385233	5595	-	ENSMUSG00000001034	protein_coding	ENSMUSG00000001034	Mapk7	ensembl_havana	18	ensembl_havana | havana	841.289	719.366	774.82	1032.59	865.022	884.524	911.018	312.333	479.697	401.768	387.474	649.904	410.683	415.119	362.213
11	61408075	61470514	62439	-	ENSMUSG00000001036	protein_coding	ENSMUSG00000001036	Epn2	ensembl_havana	18	ensembl | ensembl_havana | havana	15.7461	22.0589	19.4339	6.60702	17.2758	11.8656	17.8133	25.1302	26.7987	12.5227	35.473	9.98454	14.1007	7.05085	46.9898
3	129776408	129855203	78795	-	ENSMUSG00000001052	protein_coding	ENSMUSG00000001052	Sec24b	ensembl_havana	16	ensembl_havana | havana	1787.18	1169.13	1324.04	1337.45	979.784	1650.39	1846.22	245.917	521.236	547.868	678.078	1105.56	678.596	906.912	1134.94
11	51533890	51541670	7780	-	ENSMUSG00000001053	protein_coding	ENSMUSG00000001053	N4bp3	ensembl_havana	16	ensembl_havana | havana	249.688	166.667	245.882	197.267	77.7409	220.052	114.514	85.2633	117.914	89.7458	95.5041	118.907	89.0108	60.8136	68.5268
11	51514498	51526724	12226	-	ENSMUSG00000001054	protein_coding	ENSMUSG00000001054	Rmnd5b	ensembl_havana	10	ensembl_havana | havana	1032.5	1129.91	948.048	1072.22	794.683	800.387	1207.48	353.619	746.348	665.788	521.18	685.3	542.879	564.951	596.507
11	51510562	51514542	3980	+	ENSMUSG00000001056	protein_coding	ENSMUSG00000001056	Nhp2	ensembl_havana	4	ensembl_havana | havana	886.281	577.208	1131.4	785.291	1126.63	542.579	844.853	381.442	418.06	500.908	392.931	2450.77	2108.08	1511.51	1939.62
8	123969095	123981088	11993	-	ENSMUSG00000001062	protein_coding	ENSMUSG00000001062	Vps9d1	ensembl_havana	19	ensembl_havana | havana	722.089	988.974	570.344	696.568	530.612	826.274	787.601	222.582	344.364	387.159	345.179	316.782	300.521	317.288	246.044
8	123980934	123996485	15551	+	ENSMUSG00000001065	protein_coding	ENSMUSG00000001065	Zfp276	ensembl_havana	16	ensembl_havana | havana	1073.95	1384.03	1139.95	1102.57	1396.44	1505.08	1609.81	533.315	1078.81	810.656	1026.05	663.381	615.646	625.869	519.871
5	34790986	34794557	3571	-	ENSMUSG00000001082	protein_coding	ENSMUSG00000001082	Mfsd10	ensembl_havana	13	ensembl_havana | havana	998.751	970.594	1223.49	1229.85	1134.03	1022.59	1282.56	328.488	588.232	544.736	543.009	1192.7	1515.83	1348.48	1231.52
4	136197072	136282092	85020	+	ENSMUSG00000001089	protein_coding	ENSMUSG00000001089	Luzp1	ensembl_havana	15	ensembl | havana	632.093	410.541	415.717	668.251	451.638	594.355	592.927	110.394	176.871	151.316	173.272	584.549	460.036	480.339	518.843
5	114501628	114518570	16942	-	ENSMUSG00000001098	protein_coding	ENSMUSG00000001098	Kctd10	ensembl_havana	16	ensembl_havana | havana	2484.12	2557.25	2524.75	2881.06	2455.62	2962.68	3516.02	904.993	1920.35	1591.66	1561.34	1731.61	1754.72	1460.43	1249.75
11	78403019	78413563	10544	+	ENSMUSG00000001100	protein_coding	ENSMUSG00000001100	Poldip2	ensembl_havana	11	ensembl_havana | havana	753.56	533.09	876.218	786.236	698.433	582.492	701.081	256.687	399.302	494.646	401.118	1757.28	1878.05	1433.96	1642.03
11	78427187	78432564	5377	+	ENSMUSG00000001105	protein_coding	ENSMUSG00000001105	Ift20	ensembl_havana	16	ensembl_havana | havana	644.464	484.071	472.329	517.235	575.036	429.317	508.95	214.504	356.423	334.981	294.698	680.764	643.345	585.221	553.436
10	76544626	76562003	17377	-	ENSMUSG00000001119	protein_coding	ENSMUSG00000001119	Col6a1	ensembl_havana	8	ensembl_havana | havana	3.37416	11.0295	24.5037	47.193	4.93593	34.518	24.1751	41.2854	50.9176	44.8729	51.8451	22.6921	5.28777	3.52543	46.9898
10	76597691	76797722	200031	-	ENSMUSG00000001120	protein_coding	ENSMUSG00000001120	Pcbp3	ensembl_havana	16	ensembl | havana	67.4832	33.0884	52.3871	93.4421	34.5515	50.6983	50.895	26.0277	44.2179	25.0453	27.2869	137.06	197.41	178.915	146.843
11	78853800	78875773	21973	-	ENSMUSG00000001123	protein_coding	ENSMUSG00000001123	Lgals9	ensembl_havana	16	ensembl | ensembl_havana | havana	1964.9	931.381	2045.64	1758.39	1303.1	1612.66	2089.27	668.642	1317.15	1381.68	1354.78	2878.33	3458.13	3303.44	2990.36
X	20664053	20726759	62706	+	ENSMUSG00000001127	protein_coding	ENSMUSG00000001127	Araf	ensembl_havana	13	ensembl_havana | havana	954.887	1362.75	931.14	1279.88	916.85	1191.95	1146.41	359.901	656.569	644.918	661.707	906.775	1168.6	1150.17	950.889
X	20791693	20797795	6102	-	ENSMUSG00000001128	protein_coding	ENSMUSG00000001128	Cfp	ensembl_havana	8	ensembl_havana | havana	3979.25	3780.66	2991.98	4299.28	2846.8	4142.16	5047.52	1010.59	2253.77	1937.88	1760	935.823	1150.97	723.594	736.173
X	20807961	20828257	20296	-	ENSMUSG00000001134	protein_coding	ENSMUSG00000001134	Uxt	ensembl_havana	10	ensembl_havana | havana	179.48	105.252	154.063	158.991	116.467	136.5	180.87	61.648	101.337	82.0489	76.8505	140.337	185.957	169.451	183.534
1	36550948	36567319	16371	+	ENSMUSG00000001138	protein_coding	ENSMUSG00000001138	Cnnm3	ensembl_havana	14	ensembl_havana | havana	643.338	542.894	776.509	765.468	616.991	735.663	841.04	194.76	329.625	404.901	392.931	742.489	738.522	740.341	743.348
1	36458952	36484353	25401	-	ENSMUSG00000001143	protein_coding	ENSMUSG00000001143	Lman2l	ensembl_havana	14	ensembl_havana | havana	674.83	681.375	561.05	626.722	364.025	683.888	779.966	188.477	486.396	375.68	410.668	498.319	369.263	441.56	368.087
10	76304761	76351692	46931	+	ENSMUSG00000001150	protein_coding	ENSMUSG00000001150	Mcm3ap	ensembl_havana	8	ensembl_havana | havana	1655.59	1829.57	1580.8	2035.63	1707.76	1483.19	2068.79	639.026	1086.69	1290.88	1130.94	2413.35	1771.12	1771.26	1899.17
10	76187097	76278621	91524	-	ENSMUSG00000001151	protein_coding	ENSMUSG00000001151	Pcnt	ensembl_havana	11	ensembl_havana | havana	3301.04	2218.15	3268.31	3240.2	2644.35	2930.69	2565.12	1121	1543.61	1658.2	1810.48	8310.94	3905.95	3850.64	4520.05
6	86624024	86646144	22120	-	ENSMUSG00000001156	protein_coding	ENSMUSG00000001156	Mxd1	ensembl_havana	10	ensembl_havana | havana	4097.34	3921.59	5444.9	4979.79	13525.6	8080.45	13480.7	4664.36	10980.8	9993.16	11141.2	1281.65	620.431	817.018	682.005
6	86668750	86710366	41616	-	ENSMUSG00000001157	protein_coding	ENSMUSG00000001157	Gmcl1	ensembl_havana	14	ensembl_havana | havana	398.151	323.531	373.47	519.123	334.409	396.957	570.024	144.499	371.162	319.328	319.257	411.181	617.788	525.289	482.951
6	86652133	86661505	9372	-	ENSMUSG00000001158	protein_coding	ENSMUSG00000001158	Snrnp27	ensembl_havana	14	ensembl_havana | havana	621.969	360.296	501.902	423.792	499.763	435.789	442.787	208.222	397.961	314.11	274.233	500.135	420.378	358.712	468.591
5	120938259	120950580	12321	-	ENSMUSG00000001166	protein_coding	ENSMUSG00000001166	Oas1c	ensembl_havana	18	ensembl_havana | havana	133.842	77.2062	104.774	148.186	91.3147	86.2949	122.148	51.158	77.7163	101.66	85.7737	58.9996	67.8597	57.2882	63.9583
X	47001264	47054746	53482	+	ENSMUSG00000001173	protein_coding	ENSMUSG00000001173	Ocrl	ensembl_havana	16	ensembl_havana | havana	437.517	415.443	495.143	512.516	405.98	389.406	473.324	129.241	246.548	327.677	281.055	1082.87	1106.02	1348.48	1266.77
12	100165694	100176074	10380	+	ENSMUSG00000001175	protein_coding	ENSMUSG00000001175	Calm1	ensembl_havana	17	ensembl_havana | havana	11210.9	15408	7228.29	12168.7	12185.5	12665.8	15277.3	3919.47	9860.39	8634.91	7542.21	4302.38	8310.05	6233.42	6079.72
10	78105012	78188324	83312	-	ENSMUSG00000001211	protein_coding	ENSMUSG00000001211	Agpat3	ensembl_havana	16	ensembl | ensembl_havana | havana	365.655	719.366	221.378	158.568	412.15	230.839	187.039	136.421	265.307	272.368	275.598	388.489	296.115	289.966	344.592
17	56430085	56447344	17259	-	ENSMUSG00000001227	protein_coding	ENSMUSG00000001227	Sema6b	ensembl_havana	13	ensembl_havana	271.058	188.726	424.167	213.312	688.562	297.717	559.845	56.543	95.1355	214.972	137.799	398.474	202.698	170.983	187.306
17	56610321	56630487	20166	+	ENSMUSG00000001228	protein_coding	ENSMUSG00000001228	Uhrf1	ensembl_havana	15	ensembl_havana | havana	4268.81	1624	4271.76	4014.96	3387.2	3090.56	3442.62	2296.32	3137.22	3471.02	3625.12	8871.64	6552.51	5327.57	6897.89
17	56493807	56525906	32099	-	ENSMUSG00000001229	protein_coding	ENSMUSG00000001229	Dpp9	ensembl_havana	10	ensembl_havana | havana	1269.81	1087.01	991.979	1367.65	1259.9	1325.71	1787.69	351.824	695.427	723.185	769.49	1727.32	1477.94	1403.12	1386.19
7	30657195	30672890	15695	-	ENSMUSG00000001247	protein_coding	ENSMUSG00000001247	Lsr	ensembl_havana	17	ensembl_havana | havana	239.876	282.85	203.026	211.772	229.057	259.666	256.162	36.6392	57.0768	48.1258	37.2416	44.2784	18.6001	25.231	36.2943
7	30829552	30855322	25770	-	ENSMUSG00000001248	protein_coding	ENSMUSG00000001248	Gramd1a	ensembl_havana	16	ensembl | ensembl_havana | havana	1543.89	1651.97	1288.55	1714.99	1712.76	2345.05	1889.41	628.153	1051.85	979.897	1069.64	1343.37	1773.13	1669.29	1184.8
7	30798150	30814716	16566	-	ENSMUSG00000001249	protein_coding	ENSMUSG00000001249	Hpn	ensembl_havana	15	ensembl_havana | havana	46.1135	20.8334	33.7982	29.2597	19.7437	32.3606	24.1751	52.953	62.977	77.2231	83.225	432.058	407.158	347.254	509.055
12	111635795	111638773	2978	-	ENSMUSG00000001270	protein_coding	ENSMUSG00000001270	Ckb	ensembl_havana	10	ensembl_havana | havana	729.351	2343.4	648.159	625.034	229.773	794.899	488.208	63.7231	115.234	103.022	96.7893	63.538	45.1446	28.2034	41.7088
15	102314578	102344840	30262	+	ENSMUSG00000001280	protein_coding	ENSMUSG00000001280	Sp1	ensembl_havana	14	ensembl_havana | havana	4615.91	4155.73	3282.61	5323.36	4138.85	4823.96	5471.29	1732.2	3340.46	3443.71	4037.15	3907.58	4122.7	4801.6	5179.84
15	102124430	102140380	15950	-	ENSMUSG00000001281	protein_coding	ENSMUSG00000001281	Itgb7	ensembl_havana	11	ensembl_havana | havana	13719.3	9682.71	9697.52	10676.9	6846.13	11882.9	8859.5	1056.37	2139.88	1647.78	1795.48	2712.16	1860.41	1495.67	1578.07
15	102240144	102246575	6431	+	ENSMUSG00000001285	protein_coding	ENSMUSG00000001285	Myg1	ensembl_havana	13	ensembl_havana | havana	621.03	485.645	491.233	667.995	546.01	545.901	604.148	220.34	421.341	352.965	288.485	749.438	853.62	711.756	671.126
15	102143373	102165953	22580	-	ENSMUSG00000001288	protein_coding	ENSMUSG00000001288	Rarg	ensembl_havana	16	ensembl_havana | havana	742.316	794.119	1061.26	745.643	418.321	948.166	731.621	224.377	343.024	269.237	339.721	298.629	179.784	176.271	154.675
15	102234551	102240309	5758	+	ENSMUSG00000001289	protein_coding	ENSMUSG00000001289	Pfdn5	ensembl_havana	13	ensembl_havana | havana	3050.96	2762.81	3123.29	1993.7	2375.4	1971.24	2311.1	856.419	1358.64	1005.28	995.149	2357.42	1514.76	1267.01	1404.5
8	8667434	8711243	43809	-	ENSMUSG00000001300	protein_coding	ENSMUSG00000001300	Efnb2	ensembl_havana	17	ensembl_havana | havana	17.9955	36.7649	27.0385	21.7088	180.161	22.6524	11.4514	13.4626	12.0594	22.9582	20.4652	8.16917	16.7446	24.678	25.4528
1	186453175	186481556	28381	-	ENSMUSG00000001305	protein_coding	ENSMUSG00000001305	Rrp15	ensembl_havana	6	ensembl_havana | havana	277.806	242.648	325.306	378.487	376.365	235.154	244.296	133.729	178.211	243.148	201.923	1385.13	1005.56	832.88	864.748
11	101355825	101362680	6855	+	ENSMUSG00000001313	protein_coding	ENSMUSG00000001313	Rnd2	ensembl_havana	13	ensembl_havana | havana	9.2585	16.1391	36.4826	14.2194	9.93369	8.75657	14.3288	15.457	18.8472	19.8799	8.22958	54.9087	41.8574	35.672	42.2501
11	74797185	74816775	19590	-	ENSMUSG00000001323	protein_coding	ENSMUSG00000001323	Srr	ensembl_havana	18	ensembl | ensembl_havana | havana	158.968	140.839	88.3132	183.337	143.118	136.685	168.253	71.4615	79.3517	79.6724	89.1229	150.615	171.603	209.217	208.107
9	22038023	22047008	8985	-	ENSMUSG00000001348	protein_coding	ENSMUSG00000001348	Acp5	ensembl_havana	16	ensembl | ensembl_havana | havana	377.842	375.002	182.51	114.207	320.835	222.209	189.584	254.878	486.381	547.865	583.879	269.582	133.075	111.051	170.99
9	77988781	78016348	27567	-	ENSMUSG00000001366	protein_coding	ENSMUSG00000001366	Fbxo9	ensembl_havana	15	ensembl_havana | havana	501.624	549.021	452.895	672.972	598.481	519.928	806.687	686.594	1141.62	1295.05	1313.87	744.301	912.138	794.103	776.637
6	3498382	3603532	105150	+	ENSMUSG00000001376	protein_coding	ENSMUSG00000001376	Vps50	ensembl_havana	18	ensembl_havana | havana	653.462	575.983	451.205	773.022	513.337	769.102	636.187	212.709	318.905	350.635	336.993	612.688	788.758	721.83	835.374
18	36899581	36916259	16678	-	ENSMUSG00000001380	protein_coding	ENSMUSG00000001380	Hars	ensembl_havana	8	ensembl_havana | havana	1163.58	830.214	1100.71	1088.68	1168.2	887.79	1098.27	649.637	1046.46	1153.9	1087.01	2793.34	2362.23	1911.29	2506.23
18	36926929	36932720	5791	+	ENSMUSG00000001383	protein_coding	ENSMUSG00000001383	Zmat2	ensembl_havana	10	ensembl_havana | havana	1178.71	924.023	910.016	1094.88	1094.55	897.466	899.569	508.886	891.058	931.892	725.832	1170.91	1717.65	1143.12	1270.03
2	164611818	164620743	8925	+	ENSMUSG00000001403	protein_coding	ENSMUSG00000001403	Ube2c	ensembl_havana	14	ensembl_havana | havana	1396.9	672.797	1084.07	1412.01	1227.81	1286.87	1589.19	998.92	1999.19	2206.06	2272.96	770.625	1553.7	1144.88	1123.8
3	88243567	88269646	26079	+	ENSMUSG00000001415	protein_coding	ENSMUSG00000001415	Smg5	ensembl_havana	11	ensembl_havana | havana	1904.15	1881.14	2147.03	2134.06	2213.77	1831.61	1953.09	863.401	1473.93	1636.29	1424.38	3277.62	2623.6	2373.49	2363.83
3	88204423	88229075	24652	+	ENSMUSG00000001416	protein_coding	ENSMUSG00000001416	Cct3	ensembl_havana	14	ensembl_havana | havana	2370.93	2019.61	2317.7	3057.18	2585.17	2293.27	2417.52	874.112	1590.51	1951.45	1622.2	6488.95	9071.4	7018.28	6556.01
3	88232330	88238621	6291	+	ENSMUSG00000001418	protein_coding	ENSMUSG00000001418	Glmp	ensembl_havana	14	ensembl_havana | havana	1279.82	1328.29	1079.66	1157.73	1192.03	1371.09	1570.5	336.966	704.19	665.616	541.645	706.615	793.376	691.457	582.722
3	88049679	88079394	29715	+	ENSMUSG00000001419	protein_coding	ENSMUSG00000001419	Mef2d	ensembl_havana	18	ensembl_havana | havana	2037.61	1853.27	2744.54	2219.87	1033.9	2146.47	2026.75	438.011	843.577	791.367	1195.25	3439.67	1954.57	2113.68	2357.05
3	88235962	88243456	7494	-	ENSMUSG00000001420	protein_coding	ENSMUSG00000001420	Tmem79	ensembl_havana	14	ensembl_havana | havana	10.2281	23.4318	12.8656	10.7642	8.63788	18.2617	8.51774	8.5746	18.0347	29.3929	6.82172	12.2717	15.6522	8.33984	10.5242
6	28475138	28935162	460024	+	ENSMUSG00000001424	protein_coding	ENSMUSG00000001424	Snd1	ensembl_havana	15	ensembl_havana | havana	4797.02	4664.17	4475.86	5034.52	5155.55	4578.96	5177.34	1086.89	1841.07	2005.71	1644.03	7369.74	7748.1	6381	5850.81
10	76888012	77002383	114371	-	ENSMUSG00000001435	protein_coding	ENSMUSG00000001435	Col18a1	ensembl_havana	16	ensembl_havana | havana	5.6236	12.255	27.8835	7.55088	56.7632	6.47212	10.179	7.18007	13.3994	9.392	8.18607	53.5534	45.8273	37.8983	35.895
10	76868075	76896837	28762	+	ENSMUSG00000001436	protein_coding	ENSMUSG00000001436	Slc19a1	ensembl_havana	16	ensembl_havana | havana	184.454	159.314	310.098	386.038	340.579	175.826	258.293	66.4156	124.614	184.709	92.7754	1052.01	1150.09	964.201	913.683
11	97050540	97078708	28168	-	ENSMUSG00000001440	protein_coding	ENSMUSG00000001440	Kpnb1	ensembl_havana	6	ensembl_havana | havana	7033.95	4957.11	7547.98	7752.83	7087.97	6887.45	7059.12	2563.28	4654.94	4794.1	4857.06	13594.3	13520.2	11366	12119.9
11	97096668	97171465	74797	-	ENSMUSG00000001441	protein_coding	ENSMUSG00000001441	Npepps	ensembl_havana	14	ensembl_havana | havana	1374.4	1127.46	1277.57	1166.61	1711.54	1477.8	2231.75	551.968	1130.91	1126	1240.19	1270.76	921.836	1057.63	1123.84
11	96988897	97006158	17261	-	ENSMUSG00000001444	protein_coding	ENSMUSG00000001444	Tbx21	ensembl_havana	3	ensembl_havana	121.47	205.883	56.6119	41.5298	244.329	33.4393	50.895	16.1551	46.8978	40.6987	30.0156	19.9691	8.81295	20.2712	17.6212
11	96932386	96940040	7654	+	ENSMUSG00000001445	protein_coding	ENSMUSG00000001445	Mrpl10	ensembl_havana	11	ensembl_havana | havana	876.136	784.177	675.877	1021.08	817.989	686.973	1078.86	243.207	537.168	543.565	465.126	768.617	983.516	818.753	923.938
5	4131145	4154747	23602	-	ENSMUSG00000001467	protein_coding	ENSMUSG00000001467	Cyp51	ensembl_havana	6	ensembl_havana | havana	807.548	1442.05	936.208	827.387	444.234	921.199	757.844	203.254	480.992	406.987	377.923	343.105	611.619	643.39	713.331
8	124100492	124130575	30083	+	ENSMUSG00000001472	protein_coding	ENSMUSG00000001472	Tcf25	ensembl_havana	18	ensembl_havana | havana	4528.12	5058.91	4156.38	4966.61	4589.17	5169.12	4910.11	1397.42	2630.29	2520.18	2607.25	4289.71	4311.27	4105.34	3733.12
18	67523787	67535820	12033	+	ENSMUSG00000001473	protein_coding	ENSMUSG00000001473	Tubb6	ensembl_havana	8	ensembl_havana | havana	244.064	1089.47	264.471	224.639	255.434	346.258	240.479	44.8754	88.4358	99.1378	66.8529	259.598	284.658	218.576	217.328
8	124150266	124190010	39744	+	ENSMUSG00000001482	protein_coding	ENSMUSG00000001482	Def8	ensembl_havana	16	ensembl_havana | havana	1072.98	922.796	1041.82	1372.38	1097.01	997.781	1772.42	429.009	1034.43	895.367	764.032	2448.95	2361.84	2371.74	1902.41
11	94827050	94843869	16819	+	ENSMUSG00000001506	protein_coding	ENSMUSG00000001506	Col1a1	ensembl_havana	11	ensembl_havana | havana	48.3629	61.2748	55.767	53.8	41.9554	29.1245	44.5332	32.3103	48.2377	45.9164	47.7521	29.9536	721.78	1.76271	417.687
11	94935300	94967628	32328	-	ENSMUSG00000001507	protein_coding	ENSMUSG00000001507	Itga3	ensembl_havana	17	ensembl_havana | havana	17.9955	47.7943	16.8991	7.55088	41.9554	36.6753	7.63426	9.87259	10.7195	9.392	13.6434	19.0614	0.881295	5.28814	71.7899
6	128339930	128353110	13180	+	ENSMUSG00000001517	protein_coding	ENSMUSG00000001517	Foxm1	ensembl_havana	15	ensembl_havana | havana	2004.25	781.867	1927.35	1700.84	1543.69	1952.41	2067.62	597.722	932.596	1052.95	1315.11	2455.28	1208.25	1131.66	1442.98
6	128386407	128401895	15488	-	ENSMUSG00000001518	protein_coding	ENSMUSG00000001518	Itfg2	ensembl_havana	13	ensembl_havana | havana	212.572	235.295	223.068	245.403	172.758	195.242	213.759	96.9309	115.235	148.185	121.427	504.673	353.399	383.39	372.655
6	128376259	128393391	17132	+	ENSMUSG00000001520	protein_coding	ENSMUSG00000001520	Nrip2	ensembl_havana	13	ensembl_havana | havana	22.4944	7.35298	27.8835	14.0807	16.0418	44.2262	15.2685	15.2576	9.37955	20.8711	32.7443	56.2765	26.4388	43.1865	33.9371
6	128298124	128332815	34691	-	ENSMUSG00000001521	protein_coding	ENSMUSG00000001521	Tulp3	ensembl_havana	13	ensembl_havana | havana	29.2427	40.4414	21.1238	18.8772	32.0835	19.4164	10.179	47.5679	41.538	67.8311	38.2016	147.953	58.1655	79.3221	66.5689
17	35978622	35984632	6010	-	ENSMUSG00000001524	protein_coding	ENSMUSG00000001524	Gtf2h4	ensembl_havana	15	ensembl_havana | havana	268.808	219.364	262.781	248.235	244.329	234.075	305.37	61.0306	138.013	120.009	151.442	481.982	517.319	386.915	378.53
17	36144813	36149199	4386	-	ENSMUSG00000001525	protein_coding	ENSMUSG00000001525	Tubb5	ensembl_havana	11	ensembl_havana | havana	30335.8	16250.2	30793.3	34760.6	26107.6	27744.7	29620.1	9815	19188.9	20608.1	18799.8	39024.7	44708.7	34309.9	32078.1
13	75854876	75920484	65608	+	ENSMUSG00000001542	protein_coding	ENSMUSG00000001542	Ell2	ensembl_havana	8	ensembl_havana | havana	233.941	551.473	206.169	269	378.833	262.121	445.332	453.241	842.82	825.453	925.027	498.32	784.354	756.203	759.667
11	100259784	100288590	28806	-	ENSMUSG00000001552	protein_coding	ENSMUSG00000001552	Jup	ensembl_havana	15	ensembl_havana | havana	199.075	629.904	168.991	232.189	287.518	238.39	450.421	121.164	194.291	186.796	181.458	133.43	123.381	105.763	111.601
5	29639662	29662842	23180	+	ENSMUSG00000001569	protein_coding	ENSMUSG00000001569	Nom1	ensembl_havana	11	ensembl_havana | havana	869.408	742.65	958.178	906.105	774.941	703.304	694.717	280.023	385.902	459.164	410.668	1838.06	1387.16	1129.02	1298.75
17	26780463	26875909	95446	+	ENSMUSG00000001576	protein_coding	ENSMUSG00000001576	Ergic1	ensembl_havana	16	ensembl_havana | havana	656.837	748.778	667.515	909.884	778.643	739.978	797.779	194.76	411.36	421.597	371.102	1174.54	1817.21	1512.42	1262.19
11	69772393	69786366	13973	-	ENSMUSG00000001588	protein_coding	ENSMUSG00000001588	Acap1	ensembl_havana	13	ensembl_havana | havana	2273.07	2484.1	2275.45	2662.64	2861.62	2254.45	2873.03	1234.08	2288.6	1978.57	1938.73	2751.21	2115.09	2416.65	1531.74
12	40251566	40298504	46938	-	ENSMUSG00000001627	protein_coding	ENSMUSG00000001627	Ifrd1	ensembl_havana	13	ensembl_havana | havana	762.353	546.568	843.21	695.631	1026	734.739	806.302	362.697	693.394	598.922	562.902	680.861	866.384	959.467	835.291
6	146626493	146680311	53818	+	ENSMUSG00000001630	protein_coding	ENSMUSG00000001630	Stk38l	ensembl_havana	14	ensembl_havana | havana	159.244	193.05	94.4042	140.842	101.761	195.532	139.732	75.9528	158.458	151.269	137.021	106.111	126.913	124.669	134.4
6	113284098	113301822	17724	+	ENSMUSG00000001632	protein_coding	ENSMUSG00000001632	Brpf1	ensembl_havana	17	ensembl_havana | havana	2779.17	2737.79	2933.67	2982.57	2633.33	2776.52	3431.62	911.83	1676.26	1633.17	1575.82	3200.47	1992.62	1940.76	1872.41
6	34279369	34294414	15045	-	ENSMUSG00000001642	protein_coding	ENSMUSG00000001642	Akr1b3	ensembl_havana	19	ensembl_havana | havana	926.9	902.074	852.496	1009.23	560.627	793.239	943.939	201.73	449.896	424.916	361.738	640.991	1277.01	883.031	808.07
10	75619647	75634419	14772	-	ENSMUSG00000001663	protein_coding	ENSMUSG00000001663	Gstt1	ensembl_havana	11	ensembl_havana | havana	13.4966	7.35298	10.9844	1.88772	28.3816	2.15737	20.358	42.1829	96.4754	62.6133	98.2328	16.3383	9.69424	11.4576	17.6212
10	75609949	75617249	7300	-	ENSMUSG00000001665	protein_coding	ENSMUSG00000001665	Gstt3	ensembl_havana	12	ensembl_havana | havana	78.7303	75.9807	94.6349	109.488	86.3788	60.4065	92.8835	25.1302	49.5776	46.96	23.1939	105.292	111.924	104.94	84.19
10	75607064	75609249	2185	-	ENSMUSG00000001666	protein_coding	ENSMUSG00000001666	Ddt	ensembl_havana	9	ensembl_havana | havana	206.948	216.913	179.975	186.884	235.691	147.78	217.576	43.0804	87.0959	98.0942	88.6824	197.875	317.266	174.356	199.707
1	121481564	121495719	14155	-	ENSMUSG00000001674	protein_coding	ENSMUSG00000001674	Ddx18	ensembl_havana	12	ensembl_havana | havana	427.991	420.776	474.682	464.539	400.979	404.35	405.917	134.983	220.537	274.113	195.2	1689.77	1017.5	870.612	1031.99
5	148441445	148489600	48155	-	ENSMUSG00000001687	protein_coding	ENSMUSG00000001687	Ubl3	ensembl_havana	16	ensembl | ensembl_havana | havana	3651.99	3776.96	3619.79	4001.89	3880.87	4819.51	4551.23	1134.44	2896.96	2029.71	2167.95	1029.32	1142.16	902.509	785.12
18	56533409	56636865	103456	+	ENSMUSG00000001700	protein_coding	ENSMUSG00000001700	Gramd3	ensembl_havana	11	ensembl | havana	440.89	476.718	391.213	374.712	512.103	691.438	230.3	80.7758	159.452	148.185	173.272	99.8455	116.331	95.1865	112.253
13	38828183	38843035	14852	-	ENSMUSG00000001707	protein_coding	ENSMUSG00000001707	Eef1e1	ensembl_havana	9	ensembl_havana | havana	220.445	214.462	217.153	292.596	243.095	221.131	237.934	104.111	266.647	281.76	231.939	317.69	932.409	712.136	622.615
12	112620255	112641319	21064	-	ENSMUSG00000001729	protein_coding	ENSMUSG00000001729	Akt1	ensembl_havana	15	ensembl_havana | havana	4290.8	4144.62	5088.3	4990.15	4594.11	4432.34	6173.5	1708.85	3297.58	2977.26	2401.24	4888.8	3793.12	3237.21	2825.92
5	136995470	137004713	9243	+	ENSMUSG00000001739	protein_coding	ENSMUSG00000001739	Cldn15	ensembl_havana	15	ensembl | havana	418.396	335.785	388.679	540.83	1042.71	340.865	1015.35	418.239	990.209	714.835	581.212	267.767	367.5	321.696	313.265
7	83292033	83394935	102902	-	ENSMUSG00000001741	protein_coding	ENSMUSG00000001741	Il16	ensembl_havana	13	ensembl_havana | havana	4463.3	5934.17	3204.8	5230.23	5099.01	5678.74	6333.17	2565.43	4323.18	3532.37	3798.33	2012.88	1978.16	1869.44	1608.94
19	3946050	3957134	11084	-	ENSMUSG00000001750	protein_coding	ENSMUSG00000001750	Tcirg1	ensembl_havana	17	ensembl_havana | havana	5166.94	4518.44	5895.31	4716.39	4362.15	5757	5182.37	918.151	1863.85	1777.17	1799.57	2891.89	2250.82	1984.81	1678.58
11	100960838	100968499	7661	+	ENSMUSG00000001751	protein_coding	ENSMUSG00000001751	Naglu	ensembl_havana	10	ensembl_havana | havana	454.387	439.953	368.4	534.224	413.384	430.396	501.317	116.676	159.452	182.622	147.349	384.859	377.194	396.61	326.318
11	100973391	100977446	4055	+	ENSMUSG00000001755	protein_coding	ENSMUSG00000001755	Coasy	ensembl_havana	13	ensembl | havana	535.367	556.375	628.646	624.835	634.268	467.071	535.671	171.424	290.766	319.328	223.753	875.917	787.877	754.44	661.125
6	29735502	29761365	25863	+	ENSMUSG00000001761	protein_coding	ENSMUSG00000001761	Smo	ensembl_havana	8	ensembl_havana | havana	164.209	28.1864	183.355	442.67	133.27	228.682	257.02	91.5458	115.235	183.666	155.535	945.808	1330.75	1246.24	1138.85
6	29694221	29718559	24338	+	ENSMUSG00000001763	protein_coding	ENSMUSG00000001763	Tspan33	ensembl_havana	15	ensembl_havana | havana	237.316	533.09	322.772	240.685	124.632	349.494	120.876	1459.33	2484.24	2670.46	3423.15	794.225	785.228	758.847	952.855
2	145759399	145776935	17536	-	ENSMUSG00000001767	protein_coding	ENSMUSG00000001767	Crnkl1	ensembl_havana	6	ensembl_havana | havana	1331.45	958.338	1079.01	1243.04	1062.45	1122.91	1259.65	519.639	870.959	987.203	864.981	1198.15	1366.89	1129.02	1143.42
2	145517135	145729537	212402	+	ENSMUSG00000001768	protein_coding	ENSMUSG00000001768	Rin2	ensembl_havana	17	ensembl | havana	1378.91	1106.62	1119.57	1328.01	1014.34	1394.74	1862.79	528.632	979.493	731.536	723.101	218.752	89.892	85.4915	159.896
9	18203421	18228739	25318	+	ENSMUSG00000001774	protein_coding	ENSMUSG00000001774	Chordc1	ensembl_havana	9	ensembl_havana | havana	939.14	754.905	786.652	1122.25	1156.24	1407.68	998.816	478.372	921.876	762.839	1088.75	1147.32	2416.51	1802.37	1895.25
10	85774501	85793688	19187	-	ENSMUSG00000001783	protein_coding	ENSMUSG00000001783	Rtcb	ensembl_havana	4	ensembl_havana | havana	3034.49	2768.4	3072.25	2968.44	2587.66	2438.91	2313.18	755.702	1436.41	1354.53	1256.56	5225.57	4320.97	3606.52	3620.82
10	85665358	85724961	59603	+	ENSMUSG00000001785	protein_coding	ENSMUSG00000001785	Pwp1	ensembl_havana	14	ensembl_havana | havana	691.702	620.1	702.999	857.026	800.854	592.198	935.197	315.923	692.748	627.177	573.025	1191.79	1334.28	1259.46	1186.5
10	85857836	85887738	29902	+	ENSMUSG00000001786	protein_coding	ENSMUSG00000001786	Fbxo7	ensembl_havana	15	ensembl_havana | havana	466.913	366.318	402.65	435.776	327.901	364.854	386.07	370.252	713.788	809.8	960.214	736.307	767.466	771.12	844.817
7	29886361	29898237	11876	-	ENSMUSG00000001794	protein_coding	ENSMUSG00000001794	Capns1	ensembl_havana	14	ensembl | havana	2869.16	4338.24	2439.36	4360.67	3540.3	3770.02	4418.96	1144.32	2808.53	2366.79	1981.03	1471.36	2719.64	2052.66	1486.7
7	101312840	101444714	131874	+	ENSMUSG00000001829	protein_coding	ENSMUSG00000001829	Clpb	ensembl_havana	18	ensembl_havana | havana	392.527	278.188	368.4	418.13	444.234	403.428	437.698	131.934	233.149	297.413	237.396	996.639	864.55	755.324	893.458
9	25163735	25219868	56133	+	ENSMUSG00000001833	protein_coding	ENSMUSG00000001833	Septin7	ensembl_havana	18	ensembl | ensembl_havana | havana	3256.05	3399.11	2470.65	4209.98	3321.89	3732.28	3557.59	1626.3	3116.69	2881.21	2697.33	1660.74	3621.32	3052.46	2664.74
5	143302244	143315012	12768	-	ENSMUSG00000001844	protein_coding	ENSMUSG00000001844	Zdhhc4	ensembl_havana	11	ensembl_havana | havana	473.507	420.345	527.251	554.99	480.019	433.632	528.036	143.601	296.126	251.497	211.473	446.581	503.219	497.085	416.381
5	143489389	143513792	24403	-	ENSMUSG00000001847	protein_coding	ENSMUSG00000001847	Rac1	ensembl_havana	15	ensembl_havana | havana	8000.8	7128.5	6513.71	7881.99	6688.95	7428.85	8678.08	2086.9	4467.84	3855.44	3598.45	3443.37	5053.21	3842.94	3790.94
2	31864448	31943988	79540	+	ENSMUSG00000001855	protein_coding	ENSMUSG00000001855	Nup214	ensembl_havana	16	ensembl_havana | havana	1606.22	1109.07	1304.44	1438.22	1192.57	1366.44	1618.46	400.764	627.009	635.348	935.702	2884.1	1531.47	2115.56	2606.24
3	20269784	20296346	26562	-	ENSMUSG00000001865	protein_coding	ENSMUSG00000001865	Cpa3	ensembl_havana	3	ensembl_havana | havana	147.338	23.2844	79.4257	211.425	204.841	60.4064	35.6265	254.892	472.998	449.772	432.497	1963.32	2753.16	3356.21	2150.44
17	75312563	75699508	386945	+	ENSMUSG00000001870	protein_coding	ENSMUSG00000001870	Ltbp1	ensembl_havana	17	ensembl_havana | havana	4.49888	14.706	39.7128	47.193	30.8496	11.8656	41.9884	44.8754	108.535	77.2231	65.4885	99.8454	120.737	138.373	156.633
11	21271138	21321202	50064	-	ENSMUSG00000001891	protein_coding	ENSMUSG00000001891	Ugp2	ensembl_havana	17	ensembl_havana | havana	1346.29	1734.07	1146.6	1935.87	1744.87	1593.21	2630	655.183	1685.63	1439.07	1181.52	359.442	715.614	668.95	576.93
8	85412936	85426438	13502	+	ENSMUSG00000001909	protein_coding	ENSMUSG00000001909	Trmt1	ensembl_havana	17	ensembl_havana | havana	858.161	768.386	895.653	965.569	746.559	811.172	857.582	166.039	356.423	385.072	406.575	1721.88	1737.91	1531.79	1412.3
8	85397108	85414532	17424	-	ENSMUSG00000001910	protein_coding	ENSMUSG00000001910	Nacc1	ensembl_havana	6	ensembl_havana | havana	2113.56	1964.97	2341.75	2676.74	2081.95	2180.26	2368.42	631.037	1343.5	1505.34	1475.89	4358.58	3858.68	3653.22	3360.55
8	85426505	85526974	100469	-	ENSMUSG00000001911	protein_coding	ENSMUSG00000001911	Nfix	ensembl_havana	17	ensembl_havana | havana	715.103	572.712	714.536	709.209	545.42	686.69	671.071	221.685	371.737	415.335	532.887	2326.34	1058.38	1271.34	1440.38
7	16515265	16532200	16935	+	ENSMUSG00000001918	protein_coding	ENSMUSG00000001918	Slc1a5	ensembl_havana	18	ensembl_havana | havana	1987.38	2721.85	1820.03	2118.02	1970.66	1761.5	1855.12	1214.32	1896.03	2296.87	2668.66	1908.87	2318.69	2205.15	1923.96
X	20524565	20549419	24854	+	ENSMUSG00000001924	protein_coding	ENSMUSG00000001924	Uba1	ensembl_havana	16	ensembl_havana | havana	7020.65	6060.2	6076.86	6905.04	7765.61	6217.43	8195.54	2285.08	4011.77	4276.63	4262.24	9545.34	9138.55	7960.62	8032.78
6	125523737	125663643	139906	+	ENSMUSG00000001930	protein_coding	ENSMUSG00000001930	Vwf	ensembl_havana	18	ensembl_havana | havana	67.4831	307.6	184.2	219.919	146.844	100.318	122.148	155.269	447.538	372.549	418.854	552.78	748.22	628.408	663.08
9	37466994	37560952	93958	+	ENSMUSG00000001942	protein_coding	ENSMUSG00000001942	Siae	ensembl_havana	9	ensembl_havana | havana	516.525	380.306	604.697	665.587	423.427	542.838	498.262	167.574	229	217.847	263.839	480.261	732.827	608.175	644.589
9	37439374	37449616	10242	+	ENSMUSG00000001946	protein_coding	ENSMUSG00000001946	Esam	ensembl_havana	15	ensembl_havana | havana	11.2472	19.6079	16.0541	5.66316	14.8078	7.55081	10.179	17.0527	37.5182	12.5227	28.6512	29.0459	51.9964	59.0509	46.3371
X	73356639	73363756	7117	+	ENSMUSG00000001962	protein_coding	ENSMUSG00000001962	Fam50a	ensembl_havana	9	ensembl_havana | havana	466.759	351.718	326.997	311.474	319.601	311.74	323.183	203.734	265.307	198.275	204.652	551.875	323.435	273.22	341.328
X	73298293	73305155	6862	+	ENSMUSG00000001964	protein_coding	ENSMUSG00000001964	Emd	ensembl_havana	15	ensembl_havana | havana	923.31	845.631	686.09	740.685	768.236	656.804	848.728	261.338	470.858	515.489	451.361	432.767	846.598	659.027	662.294
11	105956887	105964439	7552	+	ENSMUSG00000001983	protein_coding	ENSMUSG00000001983	Taco1	ensembl_havana	8	ensembl_havana	188.716	164.583	178.61	180.386	157.41	199.11	191.924	52.6601	91.4262	99.9717	122.617	272.983	284.02	229.446	261.358
X	40489731	40767479	277748	+	ENSMUSG00000001986	protein_coding	ENSMUSG00000001986	Gria3	ensembl_havana	17	ensembl | ensembl_havana | havana	2658.84	1036.77	2484.18	3243.09	972.379	2875.77	2563.85	244.122	490.417	521.777	616.685	2083.12	2114.23	1919.59	2649.68
8	126144802	126296548	151746	-	ENSMUSG00000001995	protein_coding	ENSMUSG00000001995	Sipa1l2	ensembl_havana	10	ensembl | havana	879.529	726.723	703.004	823.043	1196.96	1030.14	1674.44	532.219	1046.49	944.416	998.7	283.198	146.295	190.373	174.907
2	126850637	126909830	59193	+	ENSMUSG00000001998	protein_coding	ENSMUSG00000001998	Ap4e1	ensembl_havana	16	ensembl_havana | havana	415.021	355.394	302.493	484.2	346.749	465.992	444.059	162.449	289.426	272.368	255.132	443.858	499.694	544.679	539.731
2	126912585	126939005	26420	+	ENSMUSG00000001999	protein_coding	ENSMUSG00000001999	Blvra	ensembl_havana	16	ensembl_havana | havana	560.11	414.217	491.762	469.098	370.195	374.304	511.496	127.446	294.786	258.802	210.109	551.873	465.324	397.492	453.582
X	72836965	72868576	31611	-	ENSMUSG00000002006	protein_coding	ENSMUSG00000002006	Pdzd4	ensembl_havana	13	ensembl_havana | havana	769.309	296.57	585.237	661.65	75.273	879.126	357.538	89.7508	154.093	115.835	144.62	461.106	240.593	312.321	170.99
X	72818011	72822532	4521	+	ENSMUSG00000002007	protein_coding	ENSMUSG00000002007	Srpk3	ensembl_havana	6	ensembl_havana | havana	69.7326	192.403	45.6275	21.7088	30.8496	45.3048	22.9028	69.1081	84.416	89.7458	130.977	44.4766	21.1511	34.3729	30.6739
X	72822569	72830504	7935	-	ENSMUSG00000002010	protein_coding	ENSMUSG00000002010	Idh3g	ensembl_havana	18	ensembl_havana | havana	1957.02	1861.53	1580.06	2521.99	1959.56	2159.53	2297.92	566.328	1291.7	1254.35	1125.59	1417.8	3366.58	2635.26	2183.08
X	72699600	72703724	4124	-	ENSMUSG00000002012	protein_coding	ENSMUSG00000002012	Pnck	ensembl_havana	14	ensembl_havana | havana	37.1157	9.80397	27.0385	24.5403	3.70195	35.5967	17.8133	8.07757	13.3994	3.13067	6.82172	22.6921	37.0144	23.7966	16.9685
X	72830634	72834437	3803	+	ENSMUSG00000002014	protein_coding	ENSMUSG00000002014	Ssr4	ensembl_havana	13	ensembl | ensembl_havana | havana	2243.82	2219.38	2049.86	2201.08	2028.67	1796.02	2226.65	499.015	1163.06	1038.34	852.716	1131.88	2701.16	2161.09	1935.07
X	72729784	72759782	29998	-	ENSMUSG00000002015	protein_coding	ENSMUSG00000002015	Bcap31	ensembl_havana	6	ensembl_havana	1769.18	1633.59	1455.01	1930.19	1767.06	1719.43	1922.56	614.793	1168.42	1094.69	929.119	1377.87	2542.54	1828.81	1941.59
17	75844081	75858942	14861	-	ENSMUSG00000002017	protein_coding	ENSMUSG00000002017	Fam98a	ensembl_havana	11	ensembl_havana | havana	346.413	213.236	328.687	309.587	350.452	330.078	377.895	130.139	235.829	262.976	242.854	643.552	809.914	648.679	719.852
12	84829986	84923307	93321	-	ENSMUSG00000002020	protein_coding	ENSMUSG00000002020	Ltbp2	ensembl_havana	16	ensembl | havana	25.8685	51.3892	66.7513	40.4663	11.1058	71.1933	54.7121	39.4904	58.9572	37.2569	56.3997	19.0614	3.52518	5.28814	63.0187
9	44714652	44792595	77943	-	ENSMUSG00000002028	protein_coding	ENSMUSG00000002028	Kmt2a	ensembl_havana	14	ensembl_havana | havana	3110.93	2743.79	2602.84	2151.03	2341.97	3477.66	2544.72	793.398	1181.82	1049.81	2301.6	4946.81	1856.9	3139.33	3924.95
9	44679205	44704745	25540	+	ENSMUSG00000002031	protein_coding	ENSMUSG00000002031	Ift46	ensembl_havana	14	ensembl | ensembl_havana | havana	274.431	372.551	316.858	386.983	176.46	317.134	330.818	99.6234	167.492	159.664	132.341	208.768	277.608	223.865	227.117
9	44705066	44710605	5539	-	ENSMUSG00000002032	protein_coding	ENSMUSG00000002032	Tmem25	ensembl_havana	18	ensembl_havana | havana	20.2449	36.7649	27.0385	37.7544	9.87186	36.6753	19.0856	9.87259	5.35975	5.21778	5.45738	9.07686	5.28777	7.93221	3.26318
9	44880870	44891730	10860	-	ENSMUSG00000002033	protein_coding	ENSMUSG00000002033	Cd3g	ensembl_havana	15	ensembl_havana | havana	424.019	556.375	126.743	116.095	967.444	104.633	178.133	72.6982	85.7559	96.0071	70.9459	4.53843	31.7266	9.69492	31.3265
7	19242320	19250071	7751	+	ENSMUSG00000002043	protein_coding	ENSMUSG00000002043	Trappc6a	ensembl_havana	18	ensembl_havana | havana	446.514	444.855	589.779	487.033	431.894	395.878	622.193	108.598	250.568	171.143	169.179	604.518	562.264	517.357	387.666
11	78097572	78136814	39242	-	ENSMUSG00000002052	protein_coding	ENSMUSG00000002052	Supt6	ensembl_havana	7	ensembl_havana | havana	2312.43	2446.55	2240.14	2470.04	2408.91	2476.36	2462.2	909.823	1202.17	1282.55	1411.16	4713.43	2747.59	2706.55	2903.87
11	78192355	78213284	20929	+	ENSMUSG00000002055	protein_coding	ENSMUSG00000002055	Spag5	ensembl_havana	10	ensembl_havana | havana	1805.18	914.22	1597.8	2123.67	1696.73	1599.69	1828.41	979.177	1619.98	1903.45	1918.27	2409	1957.33	1899.32	1853.48
11	78234308	78239991	5683	+	ENSMUSG00000002058	protein_coding	ENSMUSG00000002058	Unc119	ensembl_havana	14	ensembl_havana | havana	1519.49	1901.97	2144.49	1309.13	1526.44	1471.33	2025.62	577.097	1271.6	1020.6	847.258	789.688	711.206	604.61	577.583
11	78136572	78146323	9751	+	ENSMUSG00000002064	protein_coding	ENSMUSG00000002064	Sdf2	ensembl_havana	11	ensembl_havana | havana	854.803	750.786	875.195	695.638	669.878	888.073	820.514	135.777	411.117	332.869	370.671	620.09	757.323	629.346	550.564
7	37797409	37806960	9551	-	ENSMUSG00000002068	protein_coding	ENSMUSG00000002068	Ccne1	ensembl_havana	17	ensembl_havana | havana	404.899	177.697	349.811	359.611	431.894	349.494	433.88	296.178	702.126	685.616	727.196	948.535	907.732	692.745	888.236
7	16042318	16052131	9813	+	ENSMUSG00000002083	protein_coding	ENSMUSG00000002083	Bbc3	ensembl_havana	14	ensembl_havana | havana	151.837	194.854	147.867	99.1053	187.565	148.859	152.685	38.5929	58.9572	67.8311	77.7676	147.953	79.3166	102.237	74.4005
2	90948489	90966862	18373	+	ENSMUSG00000002100	protein_coding	ENSMUSG00000002100	Mybpc3	ensembl_havana	16	ensembl_havana | havana	31.4921	14.7059	32.9532	13.214	30.8496	49.6196	15.2685	9.87259	21.439	14.6098	16.3721	7.26148	9.69424	3.52543	4.56845
2	90884354	90896715	12361	+	ENSMUSG00000002102	protein_coding	ENSMUSG00000002102	Psmc3	ensembl_havana	16	ensembl_havana | havana	2715.08	1944.87	2415.71	2529.53	2823.34	2228.58	2697.46	1001.61	2050.12	1938.95	1817.31	4036.49	3795.75	2897.9	2761.33
2	91033230	91044444	11214	+	ENSMUSG00000002103	protein_coding	ENSMUSG00000002103	Acp2	ensembl_havana	17	ensembl | ensembl_havana | havana	536.851	730.155	388.69	562.929	464.19	467.604	532.843	187.353	396.953	377.002	369.026	483.354	558.015	568.413	544.086
2	90865965	90876075	10110	+	ENSMUSG00000002104	protein_coding	ENSMUSG00000002104	Rapsn	ensembl_havana	12	ensembl_havana | havana	11.2472	9.80397	25.3486	17.9333	34.5515	9.70818	2.54475	6.28256	8.03962	16.6969	21.8295	34.492	29.0827	51.1187	43.074
2	90892136	90900763	8627	-	ENSMUSG00000002105	protein_coding	ENSMUSG00000002105	Slc39a13	ensembl_havana	16	ensembl_havana | havana	199.075	290.443	175.75	161.4	181.395	172.59	155.23	45.7729	72.3566	118.965	129.613	216.937	165.683	176.271	204.928
2	6544505	7514375	969870	-	ENSMUSG00000002107	protein_coding	ENSMUSG00000002107	Celf2	ensembl_havana	19	ensembl | ensembl_havana | havana	4534.87	4908.14	3836.97	5204.47	4239.94	5492.67	5743.54	1326.52	3001.46	2823.87	3300.37	3186.88	3385.96	4027.78	3753.94
2	91014406	91033180	18774	-	ENSMUSG00000002108	protein_coding	ENSMUSG00000002108	Nr1h3	ensembl_havana	11	ensembl_havana | havana	65.2337	91.9122	27.0385	28.3158	115.994	36.6753	66.1635	35.0028	81.7361	53.2213	62.7599	18.1537	18.5072	19.3898	13.7054
2	91041917	91067328	25411	-	ENSMUSG00000002109	protein_coding	ENSMUSG00000002109	Ddb2	ensembl_havana	15	ensembl_havana | havana	202.089	291.908	202.778	210.094	271.264	200.103	152.966	78.3097	165.82	127.035	115.316	139.319	208.709	253.893	214.277
2	90912735	90946102	33367	+	ENSMUSG00000002111	protein_coding	ENSMUSG00000002111	Spi1	ensembl_havana	9	ensembl_havana | havana	5384.03	5844.35	4569.52	4812.75	6024.27	4994.37	7625.41	1663.99	3207.81	2725.76	2298.93	1986.91	1641.85	1286.79	1377.07
11	4110350	4132542	22192	+	ENSMUSG00000002129	protein_coding	ENSMUSG00000002129	Sf3a1	ensembl_havana	12	ensembl_havana | havana	2023.37	1435.06	2032.95	2100.09	2017.56	1968.61	1819.5	681.208	1114.83	1297.14	1275.66	4005.57	3606.27	3059.2	3088.95
10	127478855	127496827	17972	+	ENSMUSG00000002147	protein_coding	ENSMUSG00000002147	Stat6	ensembl_havana	19	ensembl_havana | havana	4628.2	4469.4	3223.49	4575.84	4412.72	4833.58	5757.5	1594.87	2817.88	2656.89	2506.3	2238.35	2040.2	1894.92	1807.15
7	44221804	44236287	14483	+	ENSMUSG00000002204	protein_coding	ENSMUSG00000002204	Napsa	ensembl_havana	10	ensembl_havana | havana	7990.28	7298.46	7478.91	5887.64	6449.16	6118.2	6727.55	1066.71	2329.87	1906.84	1680.34	2320.77	2368.4	1599.18	1829.6
7	44397837	44426940	29103	+	ENSMUSG00000002205	protein_coding	ENSMUSG00000002205	Vrk3	ensembl_havana	17	ensembl_havana | havana	931.266	774.51	858.47	809.834	857.62	926.59	1098.06	315.923	601.616	616.703	553.924	824.177	690.055	653.085	573.666
7	24099044	24122204	23160	+	ENSMUSG00000002210	protein_coding	ENSMUSG00000002210	Smg9	ensembl_havana	12	ensembl_havana | havana	776.056	763.485	833.125	770.19	947.697	731.35	1118.42	365.286	676.669	609.437	578.483	896.79	581.654	561.424	530.592
5	27945078	27996690	51612	-	ENSMUSG00000002221	protein_coding	ENSMUSG00000002221	Paxip1	ensembl_havana	12	ensembl_havana | havana	889.653	564.954	904.946	1089.21	939.061	855.399	928.835	518.76	743.664	855.715	905.925	1510.39	1209.14	1229.49	1307.23
6	71365618	71417622	52004	-	ENSMUSG00000002222	protein_coding	ENSMUSG00000002222	Rmnd5a	ensembl_havana	15	ensembl_havana | havana	2760.06	2707.12	2536.54	3419.6	2272.99	3445.37	2836.13	1518.59	3197.09	2994.98	3623.7	2205.67	3272.27	3031.83	2782.14
3	104702152	104725880	23728	-	ENSMUSG00000002227	protein_coding	ENSMUSG00000002227	Mov10	ensembl_havana	16	ensembl | havana	650.09	356.6	436.816	520.97	873.64	762.602	1277.46	298.871	596.251	675.14	547.102	416.617	397.463	355.177	414.424
3	104688372	104693335	4963	+	ENSMUSG00000002228	protein_coding	ENSMUSG00000002228	Ppm1j	ensembl_havana	8	ensembl_havana | havana	21.3697	50.2453	16.8991	18.8772	25.9136	15.1016	15.2685	11.6676	4.01981	7.30489	12.2791	2.72306	1.76259	5.28814	11.0948
3	104695691	104701776	6085	+	ENSMUSG00000002233	protein_coding	ENSMUSG00000002233	Rhoc	ensembl_havana	14	ensembl_havana | havana	35.991	33.0884	19.4339	30.2035	75.2729	31.2819	89.0664	42.1829	84.416	100.181	69.5816	4.53843	2.64388	0.881356	19.5791
17	28550645	28569792	19147	-	ENSMUSG00000002249	protein_coding	ENSMUSG00000002249	Tead3	ensembl_havana	22	ensembl_havana | havana	11.2472	15.9314	20.2789	9.4386	41.9554	10.7869	5.0895	16.1551	13.3994	15.6533	19.1008	24.5075	18.5072	25.5593	18.9264
17	28451674	28520449	68775	+	ENSMUSG00000002250	protein_coding	ENSMUSG00000002250	Ppard	ensembl_havana	17	ensembl_havana | havana	508.373	313.727	528.941	339.79	281.348	525.321	521.674	87.0583	143.373	179.492	147.349	353.09	111.043	139.254	165.769
17	28426752	28447583	20831	+	ENSMUSG00000002257	protein_coding	ENSMUSG00000002257	Def6	ensembl_havana	9	ensembl_havana | havana	1910.07	1509.18	2308.41	2111.6	2182.4	1730.44	2130.33	593.32	1177.99	1006.5	936.914	2861.22	1873.7	1639.69	1536.14
17	26012195	26016111	3916	-	ENSMUSG00000002274	protein_coding	ENSMUSG00000002274	Metrn	ensembl_havana	14	ensembl | ensembl_havana | havana	301.425	285.541	541.615	423.793	302.326	336.55	409.705	152.576	238.505	241.061	230.574	938.546	882.178	723.594	563.225
17	25798059	25881801	83742	+	ENSMUSG00000002279	protein_coding	ENSMUSG00000002279	Lmf1	ensembl_havana	20	ensembl | ensembl_havana | havana	661.334	607.845	508.662	652.207	335.643	654.762	516.584	137.319	198.31	190.971	162.357	402.105	392.176	399.254	417.034
17	25992750	26002307	9557	+	ENSMUSG00000002280	protein_coding	ENSMUSG00000002280	Ciao3	ensembl_havana	12	ensembl_havana | havana	732.441	840.785	642.987	781.431	607.136	766.793	773.742	198.911	434.074	428.926	431.075	667.864	723.006	678.309	543.232
17	33992724	34000805	8081	-	ENSMUSG00000002289	protein_coding	ENSMUSG00000002289	Angptl4	ensembl_havana	17	ensembl_havana | havana	61.8596	33.0884	136.038	133.084	93.7827	88.4523	95.4282	74.4932	57.6173	93.92	79.132	359.443	504.982	393.966	372.002
5	8446973	8472717	25744	-	ENSMUSG00000002297	protein_coding	ENSMUSG00000002297	Dbf4	ensembl_havana	17	ensembl_havana | havana	1419.39	616.423	1253.92	1447.88	1420.31	1160.67	1244.39	723.394	1239.44	1256.45	1238.82	1425.97	1530.8	1479.8	1559.15
17	34128388	34134565	6177	+	ENSMUSG00000002307	protein_coding	ENSMUSG00000002307	Daxx	ensembl_havana	17	ensembl_havana | havana	1744.45	1147.07	1384.89	1705.55	1022.97	1724.8	1432.68	368.875	706.148	659.525	678.078	1238.08	1462.06	995.927	987.44
17	34062065	34068749	6684	+	ENSMUSG00000002308	protein_coding	ENSMUSG00000002308	Cd320	ensembl_havana	17	ensembl_havana | havana	49.4876	64.9513	90.4101	101.937	96.2507	66.8786	99.2453	21.5402	41.538	61.5698	58.6668	206.045	376.313	284.678	242.781
14	55862857	55873415	10558	-	ENSMUSG00000002319	protein_coding	ENSMUSG00000002319	Ipo4	ensembl_havana	17	ensembl_havana | havana	242.381	312.124	242.371	342.287	293.757	251.996	329.544	85.2632	177.589	185.059	205.981	1162.07	933.499	1008.91	832.108
14	55873422	55881264	7842	-	ENSMUSG00000002320	protein_coding	ENSMUSG00000002320	Tm9sf1	ensembl_havana	16	ensembl_havana | havana	1298.77	1101.77	1231.43	1222.96	1068.87	1044.75	1427.61	338.017	702.963	645.76	600.195	1019.46	1323.25	1086.99	1203.17
14	55855494	55862853	7359	+	ENSMUSG00000002324	protein_coding	ENSMUSG00000002324	Rec8	ensembl_havana	9	ensembl_havana | havana	26.9933	17.1569	22.8138	17.9333	56.7632	4.31475	3.81713	21.5402	33.4984	42.7858	36.8373	315.874	302.284	234.441	289.118
14	55841028	55847488	6460	+	ENSMUSG00000002325	protein_coding	ENSMUSG00000002325	Irf9	ensembl_havana	16	ensembl_havana | havana	3680.05	2171.58	2734.27	3328.97	2467.98	3894.05	3110.97	759.48	1467.23	1443.24	1526.7	874.101	1400.38	1024.14	1131.67
14	55909398	55916658	7260	+	ENSMUSG00000002326	protein_coding	ENSMUSG00000002326	Gmpr2	ensembl_havana	7	ensembl_havana | havana	556.551	347.028	438.644	363.888	343.101	320.675	463.21	117.478	193.16	204.616	172.177	484.947	415.832	346.318	369.079
14	55895336	55897966	2630	-	ENSMUSG00000002329	protein_coding	ENSMUSG00000002329	Mdp1	ensembl_havana	8	ensembl_havana | havana	904.274	791.67	722.435	656.929	386.237	599.75	648.912	185.784	267.987	290.108	267.412	647.181	676.834	619.594	553.435
14	55976477	55983148	6671	-	ENSMUSG00000002332	protein_coding	ENSMUSG00000002332	Dhrs1	ensembl_havana	17	ensembl_havana | havana	924.516	905.638	816.225	868.35	842.812	881.287	1356.34	288.997	791.905	571.869	465.241	380.32	430.071	378.984	341.329
8	70625006	70636332	11326	+	ENSMUSG00000002342	protein_coding	ENSMUSG00000002342	Tmem161a	ensembl_havana	18	ensembl_havana | havana	363.284	388.482	375.16	443.614	392.406	389.406	363.9	140.011	266.647	222.277	231.939	544.611	665.377	569.356	486.865
8	70672822	70687117	14295	-	ENSMUSG00000002343	protein_coding	ENSMUSG00000002343	Armc6	ensembl_havana	12	ensembl_havana | havana	126.771	111.52	138.092	177.897	154.97	178.96	205.321	37.1613	100.264	119.281	113.157	305.314	385.715	294.498	287.623
8	70592149	70599970	7821	+	ENSMUSG00000002345	protein_coding	ENSMUSG00000002345	Borcs8	ensembl_havana	19	ensembl_havana | havana	374.531	297.796	376.849	294.484	361.557	318.213	310.46	118.471	215.73	211.842	162.357	314.967	259.101	228.271	253.223
8	70636990	70664956	27966	-	ENSMUSG00000002346	protein_coding	ENSMUSG00000002346	Slc25a42	ensembl_havana	17	ensembl | ensembl_havana | havana	67.4831	49.0198	65.9064	33.0351	55.5292	35.5967	48.3503	50.2605	61.6371	69.9182	114.605	231.46	78.4352	165.695	217.328
17	5891604	5982230	90626	+	ENSMUSG00000002365	protein_coding	ENSMUSG00000002365	Snx9	ensembl_havana	11	ensembl_havana | havana	1443.01	1200.99	1367.14	1320.46	826.768	1367.77	1266.01	350.028	675.328	604.219	671.258	1002.99	1071.65	898.102	800.132
17	56980294	57018765	38471	+	ENSMUSG00000002372	protein_coding	ENSMUSG00000002372	Ranbp3	ensembl_havana	10	ensembl_havana | havana	1727.57	1893.39	1836.95	2166.15	1440.06	1805.73	1931.47	544.788	1250.16	1160.43	1098.3	2322.77	2423.59	2010.37	1669.45
17	57024767	57029142	4375	+	ENSMUSG00000002379	protein_coding	ENSMUSG00000002379	Ndufa11	ensembl_havana	8	ensembl_havana | havana	741.19	725.494	678.496	728.659	707.072	669.862	890.662	220.787	477.017	521.777	367.009	607.24	820.486	647.796	475.771
8	71826767	71834605	7838	-	ENSMUSG00000002393	protein_coding	ENSMUSG00000002393	Nr2f6	ensembl_havana	15	ensembl_havana | havana	217.094	179.55	167.553	152.426	125.374	153.552	210.324	34.1806	56.3788	47.9992	44.5341	137.546	98.401	93.5558	87.2839
8	71819492	71822377	2885	+	ENSMUSG00000002395	protein_coding	ENSMUSG00000002395	Use1	ensembl_havana	15	ensembl | ensembl_havana | havana	1742.19	1914.23	1717.79	1542.27	1530.13	1579.2	1881.85	416.444	885.698	680.398	687.63	1116.45	1201.21	1062.03	890.194
8	71823942	71832006	8064	+	ENSMUSG00000002396	protein_coding	ENSMUSG00000002396	Ocel1	ensembl_havana	9	ensembl_havana | havana	651.189	509.179	554.038	566.795	518.765	696.452	642.168	166.861	313.444	286.982	326.568	385.281	382.786	364.75	338.235
7	27878894	27886720	7826	+	ENSMUSG00000002409	protein_coding	ENSMUSG00000002409	Dyrk1b	ensembl_havana	19	ensembl_havana | havana	221.57	169.118	228.983	163.288	140.674	249.177	207.397	78.9807	115.235	131.488	132.341	200.598	92.536	95.1864	107.685
6	39580171	39702398	122227	-	ENSMUSG00000002413	protein_coding	ENSMUSG00000002413	Braf	ensembl_havana	16	ensembl_havana | havana	1576.86	1349.27	1287.71	1706.5	1752.25	1803.32	2553.66	713.519	1369.42	1194.67	1528.07	1407.82	841.258	1208.34	1357.49
6	39569508	39580317	10809	+	ENSMUSG00000002416	protein_coding	ENSMUSG00000002416	Ndufb2	ensembl_havana	14	ensembl_havana | havana	656.836	481.62	592.312	403.028	435.596	376.706	566.207	126.549	265.307	249.61	296.063	493.78	715.106	538.509	555.393
3	20111975	20172655	60680	+	ENSMUSG00000002428	protein_coding	ENSMUSG00000002428	Hltf	ensembl_havana	13	ensembl_havana | havana	1422.72	1493.82	968.195	1688.33	1131.49	1768.95	1544.56	413.751	940.455	766.962	840.402	887.602	1294.58	1116.59	1127.03
2	181233661	181297454	63793	+	ENSMUSG00000002455	protein_coding	ENSMUSG00000002455	Prpf6	ensembl_havana	15	ensembl | havana	1499.24	1414.21	1378.98	1446	1406.74	1122.9	1436.5	604.023	854.881	1020.6	910.022	2433.48	1787.28	1560.86	1563.06
2	181330212	181335771	5559	-	ENSMUSG00000002458	protein_coding	ENSMUSG00000002458	Rgs19	ensembl_havana	14	ensembl | ensembl_havana | havana	2500.26	2560.07	1943.4	2810.81	2889.99	2555.4	3874.39	1065.34	2360.96	1991.1	1845.96	1073.79	1288.45	1063.8	948.283
18	10617775	10642080	24305	+	ENSMUSG00000002477	protein_coding	ENSMUSG00000002477	Snrpd1	ensembl_havana	6	ensembl_havana | havana	1714.08	595.271	1896.87	1168.34	1401.75	860.793	937.741	524.144	777.059	774.319	643.97	1835.28	2223.21	1619.75	2161.62
5	114845821	114860389	14568	+	ENSMUSG00000002486	protein_coding	ENSMUSG00000002486	Tchp	ensembl_havana	16	ensembl_havana | havana	233.942	174.02	229.827	187.828	162.886	273.986	152.685	77.1857	97.8154	99.1378	130.977	482.889	340.18	333.152	292.381
16	89583999	89940658	356659	-	ENSMUSG00000002489	protein_coding	ENSMUSG00000002489	Tiam1	ensembl_havana	17	ensembl_havana | havana	4361.64	5359.08	3738.05	5155.34	3010.91	4627.51	4513.03	1092.27	1859.83	1659.26	1590.83	3867.74	2560.16	2340.01	2587.7
17	24814790	24851605	36815	-	ENSMUSG00000002496	protein_coding	ENSMUSG00000002496	Tsc2	ensembl_havana	11	ensembl | havana	1153.63	1194.02	1092.02	1272.93	1079.82	1114.73	1330	432.28	823.595	780.934	813.364	1960.61	1379.77	1428.03	1572.1
17	24858260	24869302	11042	-	ENSMUSG00000002504	protein_coding	ENSMUSG00000002504	Slc9a3r2	ensembl_havana	16	ensembl_havana | havana	50.6123	101.716	48.1624	52.8561	54.2952	38.8327	55.9846	52.0555	65.6569	36.5244	35.473	38.1228	33.4892	49.356	22.1896
15	75942031	75952774	10743	-	ENSMUSG00000002524	protein_coding	ENSMUSG00000002524	Puf60	ensembl_havana	18	ensembl_havana | havana	2122.34	2219.36	1717.79	2482.38	2185.38	2123.93	2544.74	800.578	1677.6	1537.16	1429.83	2426.26	3229.05	2577.95	2475.41
2	32177396	32197934	20538	+	ENSMUSG00000002546	protein_coding	ENSMUSG00000002546	Golga2	ensembl_havana	18	ensembl | havana	1703.94	1422.8	1513.32	1668.72	1855.92	1612.64	1846.23	760.191	1126.89	1175.04	980.964	2297.34	1343.09	1263.86	1409.7
2	32145014	32150172	5158	-	ENSMUSG00000002550	protein_coding	ENSMUSG00000002550	Uck1	ensembl_havana	17	ensembl_havana | havana	636.376	568.814	660.586	607.909	502.232	641.859	602.304	138.739	348.304	341.903	360.863	707.022	912.565	812.758	651.034
12	40109768	40184228	74460	-	ENSMUSG00000002565	protein_coding	ENSMUSG00000002565	Scin	ensembl_havana	17	ensembl_havana	26.9933	63.7258	16.8991	41.5298	7.4039	16.1803	22.9028	17.0527	34.8383	11.4791	16.3721	393.936	265.27	382.508	256.486
10	128466712	128505228	38516	-	ENSMUSG00000002578	protein_coding	ENSMUSG00000002578	Ikzf4	ensembl_havana	19	ensembl_havana | havana	12.3719	29.4119	14.3642	9.4386	38.2535	15.1016	8.90663	43.9779	26.7987	27.1324	38.2016	0.907685	0.881295	2.64407	5.22109
11	98328534	98329818	1284	-	ENSMUSG00000002580	protein_coding	ENSMUSG00000002580	Mien1	ensembl_havana	8	ensembl_havana	504.999	482.845	520.492	465.323	438.064	436.868	581.476	131.036	329.624	230.626	233.303	299.536	387.77	318.17	316.528
7	25456698	25488131	31433	-	ENSMUSG00000002602	protein_coding	ENSMUSG00000002602	Axl	ensembl_havana	17	ensembl_havana | havana	689.453	507.354	457.965	447.39	554.058	759.395	423.701	297.076	861.581	672.048	759.94	86.2301	82.8417	47.5932	129.222
7	25386427	25404503	18076	+	ENSMUSG00000002603	protein_coding	ENSMUSG00000002603	Tgfb1	ensembl_havana	16	ensembl_havana | havana	3460.76	2699.77	3581.77	2609.77	2026.2	2532.75	3346.35	619.281	1183.16	1047.73	1270.21	5239.11	2804.27	2740.14	3058.26
7	25410531	25418514	7983	-	ENSMUSG00000002608	protein_coding	ENSMUSG00000002608	Ccdc97	ensembl_havana	9	ensembl_havana | havana	809.799	601.719	985.215	589.913	645.373	687.124	935.196	205.529	334.984	353.765	496.622	1221.74	429.191	561.424	653.288
17	23392843	23412227	19384	-	ENSMUSG00000002617	protein_coding	ENSMUSG00000002617	Zfp40	ensembl_havana	15	ensembl | havana	148.463	175.246	125.898	218.975	113.526	192.006	119.603	61.0306	128.634	114.791	80.4963	123.445	295.233	256.474	241.475
17	32540398	32569582	29184	-	ENSMUSG00000002625	protein_coding	ENSMUSG00000002625	Akap8l	ensembl_havana	11	ensembl_havana | havana	859.286	1171.57	848.333	1040.13	851.448	1013.97	777.421	373.364	667.288	611.524	649.428	1230.82	1136.87	1225.09	1072.93
7	33883924	33896087	12163	-	ENSMUSG00000002635	protein_coding	ENSMUSG00000002635	Pdcd2l	ensembl_havana	12	ensembl_havana | havana	406.023	338.237	355.725	312.417	294.922	310.662	399.526	93.3408	174.192	153.403	124.155	337.659	354.281	281.153	319.792
17	57310405	57318289	7884	-	ENSMUSG00000002658	protein_coding	ENSMUSG00000002658	Gtf2f1	ensembl	10	ensembl	1287.8	873.779	1184.63	1217.58	1605.41	1030.15	1048.44	625.563	805.302	1024.77	713.552	2991.73	1982.91	1541.49	1912.88
17	57297305	57303189	5884	+	ENSMUSG00000002660	protein_coding	ENSMUSG00000002660	Clpp	ensembl_havana	9	ensembl_havana | havana	278.93	278.188	270.385	304.867	346.749	240.547	263.382	112.189	172.852	273.412	191.008	699.825	895.396	642.509	655.246
17	57304339	57306323	1984	+	ENSMUSG00000002661	protein_coding	ENSMUSG00000002661	Alkbh7	ensembl_havana	15	ensembl_havana | havana	197.951	153.187	244.192	127.421	139.44	108.947	176.86	34.1053	58.9572	61.5698	46.3877	196.968	218.561	144.542	169.033
17	57372905	57385515	12610	-	ENSMUSG00000002668	protein_coding	ENSMUSG00000002668	Dennd1c	ensembl_havana	9	ensembl_havana | havana	1416.02	1406.87	1012.25	1121.31	1261.13	1376.41	1379.26	494.527	854.879	686.659	884.095	476.535	215.917	278.509	276.717
12	81620331	81641783	21452	-	ENSMUSG00000002679	protein_coding	ENSMUSG00000002679	Med6	ensembl_havana	15	ensembl | havana	280.055	274.511	177.44	319.969	235.691	247.02	269.744	94.2384	227.789	212.885	203.287	155.214	282.014	246.78	216.675
11	33996920	34042296	45376	+	ENSMUSG00000002699	protein_coding	ENSMUSG00000002699	Lcp2	ensembl_havana	14	ensembl_havana | havana	2663.31	2432.61	2027.06	2445.57	2991.21	2209.15	2852.66	836.48	1449.82	1320.09	1300.23	806.023	585.18	640.747	719.206
2	166747960	166788310	40350	+	ENSMUSG00000002718	protein_coding	ENSMUSG00000002718	Cse1l	ensembl_havana	15	ensembl_havana | havana	1987.36	1452.22	1409.38	2297.35	1586.9	1871.53	2127.41	631.845	1330.55	1442.19	1345.24	2015.98	3982.59	3225.74	3399.52
2	145744019	145758346	14327	+	ENSMUSG00000002728	protein_coding	ENSMUSG00000002728	Naa20	ensembl_havana	15	ensembl_havana | havana	497.572	491.314	446.437	581.167	492.584	497.823	465.612	166.726	255.802	282.328	255.332	352.611	670.095	653.831	626.153
2	76460242	76478360	18118	-	ENSMUSG00000002731	protein_coding	ENSMUSG00000002731	Prkra	ensembl_havana	7	ensembl_havana | havana	451.012	438.727	365.02	431.344	280.114	353.809	503.861	95.1359	192.951	195.145	152.807	367.613	555.216	433.627	444.445
2	76493388	76503461	10073	-	ENSMUSG00000002732	protein_coding	ENSMUSG00000002732	Fkbp7	ensembl_havana	15	ensembl_havana | havana	75.3562	49.0198	69.2862	48.1368	41.9554	67.9573	33.0818	9.87259	10.7195	17.7404	23.1939	31.769	37.8957	37.8983	26.1054
2	76505625	76527173	21548	+	ENSMUSG00000002733	protein_coding	ENSMUSG00000002733	Plekha3	ensembl_havana	9	ensembl_havana | havana	443.139	524.512	343.896	472.874	481.253	502.668	508.95	137.319	278.707	276.542	276.962	352.182	607.212	457.424	371.35
11	5905693	5917781	12088	+	ENSMUSG00000002741	protein_coding	ENSMUSG00000002741	Ykt6	ensembl_havana	10	ensembl_havana | havana	1886.15	1596.82	2263.63	1849.02	1952.16	1778.76	1946.74	656.976	1369.41	1232.44	1101.03	1310.7	1601.31	1242.71	1211.95
5	135216118	135274984	58866	+	ENSMUSG00000002748	protein_coding	ENSMUSG00000002748	Baz1b	ensembl_havana	8	ensembl_havana | havana	5931.78	4229.2	5848.66	6718.44	5792.3	6712.73	5910.18	2640.48	4157.85	4349.51	5267.79	9708.65	8480.62	7493.98	8057.24
17	47022389	47036468	14079	+	ENSMUSG00000002763	protein_coding	ENSMUSG00000002763	Pex6	ensembl_havana	17	ensembl_havana | havana	706.321	662.993	521.335	720.165	528.144	636.426	876.665	207.324	442.178	400.726	409.304	1111.93	1045.22	980.069	687.885
17	46957155	46961066	3911	+	ENSMUSG00000002767	protein_coding	ENSMUSG00000002767	Mrpl2	ensembl_havana	14	ensembl_havana | havana	558.984	470.591	602.451	601.24	572.569	450.892	641.277	133.729	251.908	273.411	281.055	916.759	1060.19	785.293	700.939
17	46989719	46994038	4319	+	ENSMUSG00000002768	protein_coding	ENSMUSG00000002768	Mea1	ensembl_havana	9	ensembl_havana | havana	663.556	623.087	463.837	547.85	785.189	535.503	650.918	279.125	534.64	398.179	390.202	529.51	734.686	511.443	508.394
7	45481307	45527803	46496	-	ENSMUSG00000002771	protein_coding	ENSMUSG00000002771	Grin2d	ensembl_havana	13	ensembl_havana | havana	7.87303	9.80397	10.9844	11.3263	8.63788	6.47212	13.9961	17.0527	24.1189	26.0889	20.4652	14.523	4.40647	26.0112	17.6212
7	45522196	45533157	10961	+	ENSMUSG00000002778	protein_coding	ENSMUSG00000002778	Kdelr1	ensembl_havana	15	ensembl_havana | havana	1017.87	822.309	1102.67	1149.62	955.107	1070.06	1363.99	305.153	566.792	537.431	597.584	597.256	1038.17	864.608	869.314
7	45546365	45566838	20473	+	ENSMUSG00000002781	protein_coding	ENSMUSG00000002781	Tmem143	ensembl_havana	20	ensembl_havana | havana	178.83	167.893	225.603	227.47	191.267	204.95	227.755	70.9032	136.674	124.183	130.977	348.551	338.418	261.763	287.813
6	54959565	54969936	10371	-	ENSMUSG00000002797	protein_coding	ENSMUSG00000002797	Ggct	ensembl_havana	10	ensembl_havana | havana	202.449	137.256	128.433	159.512	194.969	128.364	114.514	61.9281	116.574	97.0507	73.6746	136.153	217.68	224.746	199.707
12	112871439	112893397	21958	-	ENSMUSG00000002799	protein_coding	ENSMUSG00000002799	Jag2	ensembl_havana	7	ensembl_havana | havana	24.7438	94.3632	66.7514	37.7544	32.0835	34.518	16.5409	25.1302	16.0792	19.8276	21.8295	132.522	64.3345	96.0679	57.432
12	112940102	112942566	2464	+	ENSMUSG00000002803	protein_coding	ENSMUSG00000002803	Btbd6	ensembl_havana	15	ensembl | havana	176.581	223.04	232.362	230.301	166.588	201.714	246.841	70.0057	99.1553	120.009	139.163	326.767	237.95	260	287.16
12	112897911	112905745	7834	-	ENSMUSG00000002804	protein_coding	ENSMUSG00000002804	Nudt14	ensembl_havana	5	ensembl_havana | havana	131.592	159.315	177.44	147.242	128.334	141.308	161.592	18.8477	44.2179	50.0907	39.566	169.737	176.259	154.237	89.4112
13	19775876	19804098	28222	-	ENSMUSG00000002808	protein_coding	ENSMUSG00000002808	Epdr1	ensembl_havana	8	ensembl_havana | havana	13.4966	7.35298	16.8991	21.7088	22.2117	12.9442	8.90663	87.9558	164.812	194.101	185.551	387.581	835.467	712.137	693.751
11	60604949	60618090	13141	-	ENSMUSG00000002812	protein_coding	ENSMUSG00000002812	Flii	ensembl_havana	5	ensembl_havana | havana	3662.09	3693.64	2986.08	3774.49	4049.91	3668.61	4505.5	1439.6	2406.53	2348	2142.02	3779.61	2722.32	2369.97	2401.69
11	60630884	60668192	37308	-	ENSMUSG00000002814	protein_coding	ENSMUSG00000002814	Top3a	ensembl_havana	16	ensembl_havana | havana	438.641	432.6	581.329	602.183	420.789	533.95	511.496	143.601	270.667	218.103	261.954	995.726	785.234	702.441	633.708
9	21176589	21189069	12480	+	ENSMUSG00000002820	protein_coding	ENSMUSG00000002820	Atg4d	ensembl_havana	7	ensembl_havana | havana	1131.05	1361.45	1176.28	1106.68	878.128	1174.78	1426.95	553.577	1092.61	978.553	1160.24	734.382	673.34	674.665	631.521
9	21323133	21331571	8438	+	ENSMUSG00000002825	protein_coding	ENSMUSG00000002825	Qtrt1	ensembl_havana	9	ensembl_havana | havana	200.2	162.991	251.796	192.547	220.883	159.646	235.389	37.6953	81.7361	93.92	72.3103	436.597	448.579	342.848	361.56
17	56407591	56416804	9213	-	ENSMUSG00000002831	protein_coding	ENSMUSG00000002831	Plin4	ensembl_havana	15	ensembl | havana	37.1157	50.2453	42.2477	39.6421	72.805	44.2261	47.0779	24.2327	44.2179	52.1778	32.7443	21.7845	24.6763	22.0339	35.895
17	56386634	56407608	20974	+	ENSMUSG00000002833	protein_coding	ENSMUSG00000002833	Hdgfl2	ensembl_havana	12	ensembl_havana | havana	1152.84	897.062	1018.17	1111.87	1225.34	980.526	916.111	556.455	714.187	764.927	734.017	2293.72	1663.88	1394.31	1499.11
17	56347439	56379290	31851	+	ENSMUSG00000002835	protein_coding	ENSMUSG00000002835	Chaf1a	ensembl_havana	10	ensembl_havana | havana	1485.87	773.855	1513.25	1756.38	1593.73	1314.6	1323.18	668.301	1109.78	1222.19	1173.96	3634.93	2996.5	2618.91	2621.84
16	38264392	38273066	8674	-	ENSMUSG00000002844	protein_coding	ENSMUSG00000002844	Adprh	ensembl_havana	10	ensembl_havana | havana	1130.34	1276.97	1134.77	1234.57	1266.07	1336.49	1874.21	297.075	1045.15	955.897	764.033	710.718	932.41	851.39	612.825
16	38379060	38412525	33465	+	ENSMUSG00000002845	protein_coding	ENSMUSG00000002845	Tmem39a	ensembl_havana	15	ensembl_havana | havana	477.846	532.922	514.577	609.692	539.251	585.727	542.032	115.779	257.268	317.123	237.396	418.113	699.672	577.173	608.257
16	38318709	38343026	24317	-	ENSMUSG00000002846	protein_coding	ENSMUSG00000002846	Timmdc1	ensembl_havana	10	ensembl_havana | havana	406.023	296.57	241.657	270.888	275.178	243.783	348.631	115.779	198.311	189.927	212.838	479.258	486.475	349.898	448.361
6	88860456	88875763	15307	-	ENSMUSG00000002870	protein_coding	ENSMUSG00000002870	Mcm2	ensembl_havana	9	ensembl_havana | havana	2940.02	1529.42	3070.59	3912.3	2658.01	2470.19	2916.28	1874	3168.95	3488.59	3502.28	9108.68	8208.38	6905.39	6857.31
6	88879233	88889221	9988	+	ENSMUSG00000002871	protein_coding	ENSMUSG00000002871	Tpra1	ensembl_havana	15	ensembl_havana | havana	594.976	595.591	815.38	696.568	510.868	660.156	608.195	197.452	430.119	381.941	528.002	618.134	586.061	452.136	520.152
1	52496453	52539839	43386	-	ENSMUSG00000002881	protein_coding	ENSMUSG00000002881	Nab1	ensembl_havana	15	ensembl_havana | havana	2258.47	2096.82	1651.88	2257.69	2372.92	2231.82	2206.31	569.918	1278.3	1131.22	1084.66	1174.55	1238.21	1101.69	1067.06
8	84449880	84467956	18076	-	ENSMUSG00000002885	protein_coding	ENSMUSG00000002885	Adgre5	ensembl_havana	15	ensembl_havana | havana	6303.29	12989	4775.27	5505.8	5295.4	8202.79	6586.69	2144.03	3381.54	3203.4	3526.12	1181.6	924.133	867.892	1036.83
6	120440208	120464521	24313	+	ENSMUSG00000002897	protein_coding	ENSMUSG00000002897	Il17ra	ensembl_havana	6	ensembl_havana | havana	8965.72	7900.62	7456.68	9617.1	5698.53	10369.1	11465.3	2602.75	5469.56	5111.31	4573.44	4580.27	3891.89	3849	3088.8
12	31315233	31379644	64411	+	ENSMUSG00000002900	protein_coding	ENSMUSG00000002900	Lamb1	ensembl_havana	18	ensembl | havana	14.6213	8.57847	40.5578	33.0351	18.5097	24.8098	17.8133	41.2854	32.1585	54.2649	34.1086	54.4611	36.1331	41.4238	178.169
8	71287773	71292365	4592	-	ENSMUSG00000002910	protein_coding	ENSMUSG00000002910	Arrdc2	ensembl_havana	12	ensembl_havana | havana	364.409	556.374	315.168	372.824	191.267	357.045	253.203	148.089	178.212	204.537	245.582	263.228	221.205	246.78	232.991
5	17986688	18093800	107112	-	ENSMUSG00000002944	protein_coding	ENSMUSG00000002944	Cd36	ensembl_havana	16	ensembl | ensembl_havana | havana	142.839	1803.93	119.138	144.41	99.9526	210.344	90.3387	873.274	1894.68	1987.98	2556.77	64.4456	29.0827	50.2373	80.2742
8	4288740	4297898	9158	+	ENSMUSG00000002948	protein_coding	ENSMUSG00000002948	Map2k7	ensembl_havana	20	ensembl_havana | havana	1049.1	954.609	1128.01	1069.83	989.99	1095.93	1002.34	332.005	601.633	507.597	631.507	1474.76	1081.19	1100.86	1063.96
8	4309731	4325914	16183	-	ENSMUSG00000002949	protein_coding	ENSMUSG00000002949	Timm44	ensembl_havana	16	ensembl_havana | havana	921.144	709.562	986.056	903.272	855.149	806.857	801.598	278.228	442.179	534.302	397.025	1513.12	1537.86	1280.6	1346.38
7	141142086	141212925	70839	+	ENSMUSG00000002957	protein_coding	ENSMUSG00000002957	Ap2a2	ensembl_havana	12	ensembl_havana | havana	4674.01	4417.81	3481.07	4464.35	3787.02	6058.73	5926.57	1481.67	3174.19	2798.75	3125.39	2219.08	2143.23	1869.33	2014.43
7	44506563	44512417	5854	+	ENSMUSG00000002963	protein_coding	ENSMUSG00000002963	Pnkp	ensembl_havana	18	ensembl_havana | havana	3415.79	3226.74	3275.05	3516.82	4865.6	3050.53	5930.53	1785.15	3561.56	3096.23	2349.4	1474.99	937.697	866.374	759.016
7	44526189	44542137	15948	-	ENSMUSG00000002968	protein_coding	ENSMUSG00000002968	Med25	ensembl_havana	10	ensembl_havana | havana	620.845	802.699	803.551	739.043	626.863	742.135	721.437	219.89	375.182	372.549	410.668	1166.37	1150.97	1010.92	946.976
7	19365496	19398959	33463	-	ENSMUSG00000002981	protein_coding	ENSMUSG00000002981	Clptm1	ensembl_havana	11	ensembl_havana | havana	1945.77	2078.44	1662.01	1970.76	1712.76	1887.71	2496.4	612.998	1259.54	1421.33	1195.16	1503.13	2003.21	1668.39	1589.83
7	19340142	19363364	23222	-	ENSMUSG00000002983	protein_coding	ENSMUSG00000002983	Relb	ensembl_havana	18	ensembl | ensembl_havana | havana	390.277	1177.7	304.183	296.372	399.811	422.845	347.359	78.9807	196.971	123.14	166.45	80.784	31.7266	45.8305	63.9583
7	19435238	19449364	14126	-	ENSMUSG00000002984	protein_coding	ENSMUSG00000002984	Tomm40	ensembl_havana	18	ensembl_havana | havana	690.577	574.755	735.956	765.415	842.81	530.712	749.433	241.43	396.433	459.166	375.196	1726.43	1963.53	1521.21	1387.49
7	19430034	19433114	3080	-	ENSMUSG00000002985	protein_coding	ENSMUSG00000002985	Apoe	ensembl_havana	17	ensembl_havana | havana	5719.24	5375.05	9412.65	3404.52	4666.89	6782.69	6356.7	1614.62	2172.04	1746.91	1882.8	3066.18	3496.96	2443.1	3145.09
7	19405504	19411867	6363	-	ENSMUSG00000002992	protein_coding	ENSMUSG00000002992	Apoc2	ensembl_havana	18	ensembl | havana	417.098	317.376	279.651	128.352	186.162	416.343	408.365	27.1284	83.0612	44.8693	61.3808	2.72284	1.44947	2.64386	2.68348
12	31976253	32000535	24282	-	ENSMUSG00000002996	protein_coding	ENSMUSG00000002996	Hbp1	ensembl_havana	18	ensembl_havana | havana	2476.24	2228.2	2250.91	2208.88	2515.23	2507.64	2924.83	1178.54	2120.66	1973.71	1975.47	1192.71	1064.71	1015.73	1088.61
12	32008475	32111296	102821	-	ENSMUSG00000002997	protein_coding	ENSMUSG00000002997	Prkar2b	ensembl_havana	16	ensembl_havana | havana	822.172	865.202	884.667	1322.34	982.248	751.845	1388.15	899.299	2003.2	1856.5	1714.98	2067.69	3110.97	2549.75	2508.11
6	134897364	134902477	5113	+	ENSMUSG00000003031	protein_coding	ENSMUSG00000003031	Cdkn1b	ensembl_havana	15	ensembl_havana | havana	2814.05	2949.76	2595.7	2935.39	3552.62	3767.82	3319.6	1733.99	3325.7	2814.45	3483.14	1602.06	1680.63	1665.76	1372.48
4	55527143	55532467	5324	-	ENSMUSG00000003032	protein_coding	ENSMUSG00000003032	Klf4	ensembl_havana	9	ensembl_havana | havana	2908.53	3002.47	2228.99	4248.32	1810.26	3716.07	3576.65	455.934	747.685	663.701	560.746	1052.92	623.075	482.983	622.614
8	72993862	73011230	17368	+	ENSMUSG00000003033	protein_coding	ENSMUSG00000003033	Ap1m1	ensembl_havana	16	ensembl_havana | havana	1636.47	1428.93	1274.19	1329.9	1335.17	1249.12	1982.37	495.424	850.859	968.419	948.22	1545.78	1297.27	1123.73	1126.45
8	72915044	72937749	22705	+	ENSMUSG00000003037	protein_coding	ENSMUSG00000003037	Rab8a	ensembl_havana	17	ensembl_havana | havana	3094.09	2504.91	2109.85	2768.34	3467.49	2606.11	3334.91	1207.15	2198.83	1946.23	1754.54	1544.88	1846.31	1513.29	1645.95
4	133692049	133695962	3913	-	ENSMUSG00000003038	protein_coding	ENSMUSG00000003038	Hmgn2	ensembl_havana	16	ensembl_havana | havana	5813.85	7535.34	5599.26	9805.81	9234.96	7542.93	12815.5	3801.06	11499.6	9857.63	8088.53	2851.35	7517.91	5954.47	4779.68
8	72973574	72978263	4689	+	ENSMUSG00000003039	protein_coding	ENSMUSG00000003039	Fam32a	ensembl_havana	10	ensembl_havana | havana	2632.88	2814.96	2598.31	1735.74	2851.69	2992.19	3446.94	1404.6	2256.45	2284.34	2274.33	1894.3	1981.16	1823.55	1750.36
13	19541846	19579966	38120	-	ENSMUSG00000003062	protein_coding	ENSMUSG00000003062	Stard3nl	ensembl_havana	14	ensembl_havana | havana	771.558	759.807	622.731	636.161	488.657	706.539	763.426	110.394	281.386	241.061	195.101	182.445	275.846	215.932	235.602
10	79951637	79966517	14880	+	ENSMUSG00000003068	protein_coding	ENSMUSG00000003068	Stk11	ensembl_havana	18	ensembl_havana | havana	1861.57	1834.04	1968.63	2040.15	1947.24	1904.49	2327.86	1071.29	2067.39	1885.14	2065.99	3420.35	2621.45	2391.5	2197.32
10	79974466	79981653	7187	+	ENSMUSG00000003072	protein_coding	ENSMUSG00000003072	Atp5d	ensembl_havana	16	ensembl | havana	2507.01	1676.46	2718.18	1735.74	2619.75	1622.34	2434.1	653.386	1041.13	1016.43	950.947	3281.4	2672.16	1975.96	2337.05
7	16738565	16761850	23285	-	ENSMUSG00000003099	protein_coding	ENSMUSG00000003099	Ppp5c	ensembl_havana	12	ensembl_havana | havana	791.803	822.309	956.488	991.056	867.489	929.826	1034.44	271.047	644.508	592.739	493.893	1985.1	1946.79	1589.08	1303.3
11	98093885	98169331	75446	+	ENSMUSG00000003119	protein_coding	ENSMUSG00000003119	Cdk12	ensembl_havana	15	ensembl_havana | havana	2188.7	1996.33	1810.73	2127.44	2228.58	2538.14	2185.94	1054.57	1697.69	1880.48	2238.89	2524.28	2265.83	2374.41	2857.88
7	25078952	25098136	19184	-	ENSMUSG00000003123	protein_coding	ENSMUSG00000003123	Lipe	ensembl_havana	16	ensembl | ensembl_havana | havana	841.404	1078.9	861.059	937.272	968.775	1239.69	1236.09	286.868	558.743	524.326	452.459	487.657	450.912	449.076	377.91
9	45874157	45923989	49832	-	ENSMUSG00000003131	protein_coding	ENSMUSG00000003131	Pafah1b2	ensembl_havana	8	ensembl_havana | havana	1376.66	1321.09	1440.65	1964.17	1594.3	1560.86	1731.7	669.541	1362.71	1311.75	1268.84	1480.43	2584.84	2219.25	1995.11
1	39410573	39517837	107264	-	ENSMUSG00000003134	protein_coding	ENSMUSG00000003134	Tbc1d8	ensembl_havana	11	ensembl_havana | havana	2739.99	4043.76	3236.9	2799.78	2889.96	4054.92	3522.07	1031.14	2121.66	1747.19	1845.99	919.113	588.374	654.402	608.173
1	39574073	39585971	11898	+	ENSMUSG00000003135	protein_coding	ENSMUSG00000003135	Cnot11	ensembl_havana	16	ensembl | havana	656.839	649.513	730.039	711.673	667.584	586.806	689.627	302.46	471.658	471.688	398.39	736.133	912.136	778.236	771.419
6	122704768	122778600	73832	-	ENSMUSG00000003153	protein_coding	ENSMUSG00000003153	Slc2a3	ensembl_havana	11	ensembl_havana | havana	2810.7	3250.04	2889.78	4126.67	7351.07	4573.77	9240.92	3116.16	6569.83	6043.25	5324.98	1032.94	1102.5	1243.59	1004.4
6	122796873	122822326	25453	+	ENSMUSG00000003154	protein_coding	ENSMUSG00000003154	Foxj2	ensembl_havana	16	ensembl | ensembl_havana | havana	697.329	699.709	781.575	685.237	514.509	853.238	825.652	229.711	431.406	335.923	461.147	392.119	230.005	299.662	286.507
5	8096078	8119380	23302	+	ENSMUSG00000003161	protein_coding	ENSMUSG00000003161	Sri	ensembl_havana	16	ensembl_havana | havana	2628.47	3378.68	2052.39	2993.01	4464.57	2924.3	4748.5	1465.63	3230.58	2862.45	2448.98	832.347	1544.9	1418.1	1431.87
16	17657346	17716427	59081	-	ENSMUSG00000003166	protein_coding	ENSMUSG00000003166	Dgcr2	ensembl_havana	21	ensembl_havana | havana	1670.64	1538.57	1959.58	1980.13	1547.32	2093.27	2048.86	558.419	1112.05	1077.03	1217.03	2307.62	2594.7	2297.43	2211.27
7	44647072	44652273	5201	+	ENSMUSG00000003184	protein_coding	ENSMUSG00000003184	Irf3	ensembl_havana	16	ensembl_havana | havana	1213.57	1450.99	1224.34	1234.57	1155.01	1201.66	1304.19	408.366	613.691	654.31	699.909	1554.86	1405.67	1206.58	1103.61
7	44640646	44648137	7491	-	ENSMUSG00000003190	protein_coding	ENSMUSG00000003190	Bcl2l12	ensembl_havana	13	ensembl_havana | havana	316.486	231.569	227.745	417.228	275.782	279.629	351.115	68.4201	150.073	151.472	162.65	473.53	511.629	521.411	368.221
17	56199093	56205929	6836	+	ENSMUSG00000003198	protein_coding	ENSMUSG00000003198	Zfp959	ensembl_havana	11	ensembl_havana | havana	223.374	237.746	256.021	236.919	227.053	261.206	215.563	78.5795	172.958	148.022	176	150.132	264.388	250.24	159.306
17	56312711	56323791	11080	+	ENSMUSG00000003199	protein_coding	ENSMUSG00000003199	Mpnd	ensembl_havana	17	ensembl_havana | havana	1304.67	1193.63	1130.55	1290.26	923.018	1297.66	1269.83	257.585	557.414	498.819	391.567	585.457	553.452	408.949	404.635
17	56323750	56343636	19886	-	ENSMUSG00000003200	protein_coding	ENSMUSG00000003200	Sh3gl1	ensembl_havana	11	ensembl_havana | havana	894.152	1127.45	815.382	1279.87	921.783	1280.4	1327.09	355.413	730.265	732.576	684.901	813.285	1114.84	992.409	738.781
17	56259640	56264023	4383	+	ENSMUSG00000003206	protein_coding	ENSMUSG00000003206	Ebi3	ensembl_havana	8	ensembl_havana	486.909	583.336	459.265	539.746	552.526	519.927	746.558	234.151	475.677	370.462	308.199	173.31	154.168	98.7119	129.817
17	56266099	56275286	9187	+	ENSMUSG00000003208	protein_coding	ENSMUSG00000003208	Yju2	ensembl_havana	10	ensembl_havana | havana	347.478	336.452	316.962	389.367	409.255	316.285	335.869	151.294	233.116	217.974	216.65	511.72	399.994	434.848	319.199
10	58282742	58330179	47437	+	ENSMUSG00000003226	protein_coding	ENSMUSG00000003226	Ranbp2	ensembl_havana	8	ensembl_havana | havana	7101.46	6345.61	5653.6	8543.81	6176.08	6852.89	6762.68	2600.98	4896.12	5777.12	5933.53	11122.8	12605.2	12206.7	14540.6
19	60878187	61084407	206220	+	ENSMUSG00000003228	protein_coding	ENSMUSG00000003228	Grk5	ensembl_havana	10	ensembl_havana | havana	793.559	1010.12	682.056	778.055	580.245	965.746	1204.55	167.264	322.925	259.282	385.839	206.952	77.5539	115.458	157.719
16	20335732	20352761	17029	+	ENSMUSG00000003233	protein_coding	ENSMUSG00000003233	Dvl3	ensembl_havana	13	ensembl_havana | havana	395.901	296.57	446.136	286.934	286.284	425.003	416.067	102.316	210.37	157.577	287.877	542.796	230.018	323.458	439.878
16	20367327	20380130	12803	+	ENSMUSG00000003234	protein_coding	ENSMUSG00000003234	Abcf3	ensembl_havana	17	ensembl_havana | havana	965.009	904.415	964.938	952.355	929.189	813.33	921.2	327.59	525.255	502.994	484.342	1156.39	1066.37	826.71	956.112
16	20317567	20328074	10507	+	ENSMUSG00000003235	protein_coding	ENSMUSG00000003235	Eif2b5	ensembl_havana	14	ensembl_havana | havana	1153.96	769.611	881.283	1134.52	1143.9	885.6	1067.52	370.671	578.852	729.445	585.304	1946.09	1897.42	1571.45	1671.4
7	45456061	45464006	7945	-	ENSMUSG00000003269	protein_coding	ENSMUSG00000003269	Cyth2	ensembl_havana	18	ensembl | ensembl_havana | havana	747.631	637.974	716.985	666.365	677.273	652.605	841.041	302.915	530.615	461.221	477.521	637.727	601.009	514.712	522.669
4	3900996	3938424	37428	-	ENSMUSG00000003282	protein_coding	ENSMUSG00000003282	Plag1	ensembl_havana	10	ensembl_havana | havana	19.1202	33.0884	41.4027	32.0912	49.3593	18.3377	34.3542	52.953	52.2575	61.5698	39.566	42.6612	112.806	60.8136	115.517
2	152950388	152993362	42974	+	ENSMUSG00000003283	protein_coding	ENSMUSG00000003283	Hck	ensembl_havana	16	ensembl | ensembl_havana	5462.61	5205.79	3170.27	4230.24	5801.08	5367.45	7749.94	1732.21	3587.1	3658.79	2705.51	530.089	206.223	219.458	336.108
9	20914034	20920136	6102	+	ENSMUSG00000003299	protein_coding	ENSMUSG00000003299	Mrpl4	ensembl_havana	11	ensembl_havana | havana	859.285	763.485	642.164	754.144	732.987	830.588	1005.18	162.449	347.044	350.634	313.799	650.81	808.149	661.017	582.152
9	21141026	21150658	9632	-	ENSMUSG00000003308	protein_coding	ENSMUSG00000003308	Keap1	ensembl_havana	16	ensembl_havana | havana	1854.15	1216.02	1869.58	1649.41	1852.88	1561.44	1683.95	508.546	870.8	774.064	818.093	1880.32	1674.94	1495.56	1452.69
9	21205571	21223634	18063	-	ENSMUSG00000003309	protein_coding	ENSMUSG00000003309	Ap1m2	ensembl_havana	15	ensembl_havana | havana	33.7416	33.0884	23.6587	36.8105	23.4457	39.9114	31.8094	24.2327	18.7591	11.4791	27.2869	21.7845	7.93165	14.9831	7.17899
8	111881053	111985849	104796	-	ENSMUSG00000003316	protein_coding	ENSMUSG00000003316	Glg1	ensembl_havana	15	ensembl_havana | havana	4750.82	3497.56	4378.53	4228.51	3478.64	4487.34	4928	1003.41	2007.23	2064.15	2393.08	5060.43	3022.83	2919.05	3806.16
10	80478451	80492906	14455	-	ENSMUSG00000003344	protein_coding	ENSMUSG00000003344	Btbd2	ensembl_havana	15	ensembl | havana	579.232	504.904	451.205	635.217	415.851	512.377	586.564	159.757	317.565	258.802	255.132	658.07	760.56	576.406	562.572
10	80458672	80476584	17912	+	ENSMUSG00000003345	protein_coding	ENSMUSG00000003345	Csnk1g2	ensembl_havana	17	ensembl_havana | havana	2207.81	2133.59	2195.18	2437.05	2187.85	2087.25	2431.5	971.104	1609.26	1484.98	1399.82	2441.68	2392.71	2106.44	1991.84
10	80419488	80426176	6688	-	ENSMUSG00000003346	protein_coding	ENSMUSG00000003346	Abhd17a	ensembl_havana	15	ensembl_havana | havana	1258.56	1274.52	1206.58	1089.22	691.029	975.14	1316.92	293.486	637.811	540.564	522.544	792.411	992.344	820.549	661.767
10	80521087	80537812	16725	-	ENSMUSG00000003348	protein_coding	ENSMUSG00000003348	Mob3a	ensembl_havana	11	ensembl_havana | havana	2996.25	3759.82	3107.73	3568.73	3415.67	3842.28	4122.5	1264.59	2736.15	2081.89	2068.35	1789.04	2108.06	1883.46	1630.93
15	98528721	98542411	13690	+	ENSMUSG00000003352	protein_coding	ENSMUSG00000003352	Cacnb3	ensembl_havana	15	ensembl_havana | havana	49.4876	379.904	60.8367	26.4281	39.4874	74.4294	24.1751	2.69252	5.35975	6.26133	1.36434	3.63074	0.881295	13.2203	14.358
15	98622247	98626080	3833	-	ENSMUSG00000003355	protein_coding	ENSMUSG00000003355	Fkbp11	ensembl_havana	8	ensembl_havana | havana	20.2449	39.2159	41.4027	58.5193	80.2089	18.3377	58.5293	31.4128	20.099	41.7422	19.1008	210.583	144.532	121.627	170.338
15	98543015	98560776	17761	-	ENSMUSG00000003360	protein_coding	ENSMUSG00000003360	Ddx23	ensembl_havana	16	ensembl_havana | havana	2298.93	2324.75	2459.66	2808.94	2005.21	2653.59	2393.35	785.319	1290.36	1327.4	1297.49	3904.9	3457.31	2756.89	2297.91
7	27231425	27252644	21219	-	ENSMUSG00000003363	protein_coding	ENSMUSG00000003363	Pld3	ensembl_havana	16	ensembl_havana | havana	361.035	491.424	294.889	329.407	666.353	352.731	424.973	284.51	604.313	524.909	609.862	393.935	280.251	309.356	239.517
7	24709274	24771772	62498	-	ENSMUSG00000003378	protein_coding	ENSMUSG00000003378	Grik5	ensembl_havana	10	ensembl_havana | havana	92.227	101.716	111.534	49.0807	92.5487	86.295	63.6188	21.5402	33.4984	21.9147	43.659	343.106	127.788	215.051	215.37
7	24596806	24601623	4817	+	ENSMUSG00000003379	protein_coding	ENSMUSG00000003379	Cd79a	ensembl_havana	8	ensembl_havana	436.391	1230.32	361.64	59.4632	93.7827	161.803	90.3387	647.944	1034.43	1019.43	1264.39	34.2892	5.28777	20.2712	69.1794
7	24669177	24672180	3003	-	ENSMUSG00000003380	protein_coding	ENSMUSG00000003380	Rabac1	ensembl_havana	12	ensembl_havana | havana	884.032	1460.79	1117.03	1112.81	1101.94	1011.81	1697.35	264.765	672.647	510.3	497.986	599.979	940.344	816.138	537.773
3	87432714	87447464	14750	+	ENSMUSG00000003382	protein_coding	ENSMUSG00000003382	Etv3	ensembl_havana	19	ensembl | havana	1308.06	2788.03	1204.8	1416.73	1161.18	1784.14	1244.38	343.706	676.648	710.577	762.648	925.843	1023.18	973.02	845.154
9	21914102	21925519	11417	+	ENSMUSG00000003402	protein_coding	ENSMUSG00000003402	Prkcsh	ensembl_havana	15	ensembl_havana | havana	1413.77	1205.89	1382.35	1595.13	1475.84	1374.26	1554.84	359.003	740.985	777.449	682.172	2749.35	2747.84	1924.86	1890.07
2	13655832	13798876	143044	-	ENSMUSG00000003418	protein_coding	ENSMUSG00000003418	St8sia6	ensembl_havana	12	ensembl_havana | havana	166.458	580.884	98.8596	121.758	44.4234	122.97	105.607	83.4683	93.7955	76.1795	83.225	273.213	355.162	416.882	279.981
7	44742414	44753276	10862	-	ENSMUSG00000003420	protein_coding	ENSMUSG00000003420	Fcgrt	ensembl_havana	9	ensembl_havana | havana	1672.45	2268.39	1764.27	1606.45	471.381	1731.28	1003.9	99.6234	286.746	216.016	210.109	196.968	135.719	97.8305	131.833
7	44711853	44727635	15782	+	ENSMUSG00000003421	protein_coding	ENSMUSG00000003421	Nosip	ensembl_havana	14	ensembl_havana | havana	805.299	721.817	1003.81	844.754	756.431	691.437	947.92	215.402	456.918	459.164	476.156	1111.92	824.012	710.374	578.887
7	44803727	44809490	5763	+	ENSMUSG00000003423	protein_coding	ENSMUSG00000003423	Pih1d1	ensembl_havana	16	ensembl_havana | havana	892.545	592.254	761.383	927.111	705.416	755.165	1005.87	153.503	541.224	454.315	332.325	859.869	865.265	683.474	525.126
7	44771803	44773864	2061	-	ENSMUSG00000003429	protein_coding	ENSMUSG00000003429	Rps11	ensembl_havana	12	ensembl_havana | havana	12565.1	14786.2	10743	12364.5	8504.53	11777.7	11176.5	2068.71	5525.37	4931.71	4347.7	8209.41	14731.4	11259.7	9959.53
7	28014316	28038172	23856	-	ENSMUSG00000003435	protein_coding	ENSMUSG00000003435	Supt5	ensembl_havana	10	ensembl_havana | havana	2204.98	2480.32	2106.09	2762.64	2180.24	2589.44	2444.5	757.096	1443.35	1446.61	1296.36	3382.74	3110.63	2559.28	2199.48
7	28092376	28098814	6438	+	ENSMUSG00000003437	protein_coding	ENSMUSG00000003437	Paf1	ensembl_havana	15	ensembl_havana | havana	846.915	775.74	478.244	896.666	993.354	793.916	712.529	376.056	472.998	507.168	522.543	871.375	1193.27	1045.3	858.214
7	28004941	28011498	6557	-	ENSMUSG00000003438	protein_coding	ENSMUSG00000003438	Timm50	ensembl_havana	18	ensembl_havana | havana	413.897	408.09	484.159	498.357	392.407	410.979	563.662	149.884	288.086	325.589	297.427	824.182	1171.24	859.32	781.86
7	28085571	28092134	6563	-	ENSMUSG00000003444	protein_coding	ENSMUSG00000003444	Med29	ensembl_havana	9	ensembl_havana	141.715	182.599	130.123	181.221	176.46	158.567	167.954	52.953	108.535	109.573	128.248	241.444	242.356	190.373	201.664
6	149310384	149464828	154444	+	ENSMUSG00000003452	protein_coding	ENSMUSG00000003452	Bicd1	ensembl_havana	16	ensembl_havana | havana	51.7371	78.4317	43.9376	94.386	117.228	32.3606	58.5293	153.474	100.495	123.14	143.256	239.629	255.575	323.458	264.97
1	171893580	171910363	16783	-	ENSMUSG00000003458	protein_coding	ENSMUSG00000003458	Ncstn	ensembl_havana	13	ensembl_havana | havana	2371.91	2117.04	2605.93	2242.45	1760.13	2212.36	2647.77	480.727	980.836	937.355	848.251	1897.71	1444.43	1213.03	1247.17
1	171954322	171964061	9739	+	ENSMUSG00000003464	protein_coding	ENSMUSG00000003464	Pex19	ensembl_havana	14	ensembl_havana | havana	941.395	948.534	931.139	1070.34	750.261	848.925	1141.32	347.336	759.744	574.999	562.11	990.283	1082.23	876.947	847.117
8	72742326	72763471	21145	-	ENSMUSG00000003484	protein_coding	ENSMUSG00000003484	Cyp4f18	ensembl_havana	5	ensembl_havana | havana	1435.14	1289.22	1178.71	1197.76	1670.66	1507.94	2383.13	662.361	1378.8	1124.95	1110.52	420.259	274.083	409.831	219.286
6	29200433	29216364	15931	-	ENSMUSG00000003500	protein_coding	ENSMUSG00000003500	Impdh1	ensembl_havana	14	ensembl_havana | havana	403.774	523.287	752.01	787.178	826.771	275.065	664.18	332.976	569.473	610.48	523.908	2343.63	1573.99	1341.41	1382.29
11	101861969	101877840	15871	-	ENSMUSG00000003518	protein_coding	ENSMUSG00000003518	Dusp3	ensembl_havana	14	ensembl_havana | havana	1275.44	1285.54	1215.03	1059.96	572.566	1505.85	1370.36	169.629	306.846	267.15	260.589	254.152	222.086	170.983	218.634
16	17878221	17908068	29847	-	ENSMUSG00000003526	protein_coding	ENSMUSG00000003526	Prodh	ensembl_havana	13	ensembl_havana | havana	172.082	149.51	395.438	320.912	364.025	171.511	213.759	157.064	242.528	221.234	200.559	819.641	705.92	779.998	674.172
16	17718573	17729213	10640	-	ENSMUSG00000003527	protein_coding	ENSMUSG00000003527	Ess2	ensembl_havana	10	ensembl_havana | havana	502.75	569.856	573.725	572.874	599.714	440.105	539.487	235.147	361.783	325.589	319.257	610.873	607.215	492.68	522.11
16	17743087	17746084	2997	-	ENSMUSG00000003528	protein_coding	ENSMUSG00000003528	Slc25a1	ensembl_havana	16	ensembl_havana | havana	548.862	569.855	589.778	603.127	540.485	471.386	582.749	183.989	289.426	312.023	255.132	934.916	1209.14	1057.63	926.744
16	17870724	17889497	18773	+	ENSMUSG00000003531	protein_coding	ENSMUSG00000003531	Dgcr6	ensembl_havana	16	ensembl | havana	159.71	158.089	307.563	191.604	150.546	146.701	180.677	68.2106	113.895	115.835	96.8685	453.842	389.532	300.542	285.854
17	35992459	36015514	23055	-	ENSMUSG00000003534	protein_coding	ENSMUSG00000003534	Ddr1	ensembl_havana	18	ensembl | ensembl_havana | havana	698.452	1263.48	951.416	361.498	115.994	960.03	424.973	27.8228	49.5777	60.5262	72.3103	25.4152	1.76259	6.1695	13.0527
17	36132576	36133816	1240	+	ENSMUSG00000003541	protein_coding	ENSMUSG00000003541	Ier3	ensembl_havana	7	ensembl_havana	142.839	169.118	185.045	141.579	596.014	200.636	218.849	105.906	192.951	235.844	154.171	764.271	461.798	658.373	463.371
7	19036621	19043977	7356	-	ENSMUSG00000003545	protein_coding	ENSMUSG00000003545	Fosb	ensembl_havana	4	ensembl_havana | havana	585.978	871.327	936.209	603.127	1282.11	2658.96	54.7122	406.571	541.334	564.563	941.398	10739.8	2954.09	7015.63	4992.67
17	46941550	46956949	15399	-	ENSMUSG00000003546	protein_coding	ENSMUSG00000003546	Klc4	ensembl_havana	11	ensembl_havana | havana	272.182	349.266	322.773	292.596	317.133	453.05	479.686	179.502	367.142	229.582	238.76	254.152	223.849	167.458	154.022
7	19078703	19090450	11747	+	ENSMUSG00000003549	protein_coding	ENSMUSG00000003549	Ercc1	ensembl_havana	10	ensembl_havana | havana	223.117	165.442	128.433	276.819	249.264	217.895	243.024	75.3907	159.452	118.974	100.962	290.46	310.216	245.017	228.422
19	46695897	46729539	33642	+	ENSMUSG00000003559	protein_coding	ENSMUSG00000003559	As3mt	ensembl_havana	9	ensembl_havana | havana	340.79	306.374	247.571	472.874	206.075	314.976	334.635	96.9309	159.453	160.707	155.535	508.304	633.651	487.39	511.014
8	70735477	70747012	11535	+	ENSMUSG00000003573	protein_coding	ENSMUSG00000003573	Homer3	ensembl_havana	16	ensembl | ensembl_havana | havana	154.825	129.439	252.082	235.148	93.9409	236.217	194.238	37.1114	114.414	100.168	87.6056	341.672	322.328	263.605	222.247
8	70835005	70892230	57225	-	ENSMUSG00000003575	protein_coding	ENSMUSG00000003575	Crtc1	ensembl_havana	14	ensembl_havana | havana	258.686	215.687	272.075	224.639	138.206	276.143	254.475	94.2384	99.1553	116.878	169.179	588.18	300.522	433.628	473.158
11	4085202	4091173	5971	+	ENSMUSG00000003581	protein_coding	ENSMUSG00000003581	Rnf215	ensembl_havana	15	ensembl_havana | havana	365.534	381.129	380.229	341.677	341.813	338.708	272.288	79.8782	164.812	125.227	129.613	215.121	177.14	153.356	142.275
11	4047039	4073416	26377	-	ENSMUSG00000003585	protein_coding	ENSMUSG00000003585	Sec14l2	ensembl_havana	14	ensembl_havana | havana	16.8708	23.2844	6.75963	5.66316	69.103	5.39343	3.81713	215.402	321.585	384.028	382.016	521.011	182.428	152.475	291.728
2	112323309	112464919	141610	+	ENSMUSG00000003604	protein_coding	ENSMUSG00000003604	Aven	ensembl_havana	15	ensembl_havana | havana	217.044	167.798	158.767	203.874	205.955	174.747	217.576	73.5196	104.515	146.098	130.804	550.056	508.507	416.882	471.856
3	20011218	20063310	52092	+	ENSMUSG00000003617	protein_coding	ENSMUSG00000003617	Cp	ensembl_havana	17	ensembl | ensembl_havana | havana	842.416	305.148	463.879	991.055	394.874	741.058	382.985	77.1857	129.974	105.399	137.799	39.0305	21.1511	32.6102	174.254
5	9016033	9047325	31292	-	ENSMUSG00000003623	protein_coding	ENSMUSG00000003623	Crot	ensembl_havana	5	ensembl_havana | havana	848.037	933.829	803.548	1045.8	819.365	966.503	1109.52	311.435	781.182	540.562	534.823	457.473	738.524	764.135	626.53
4	133574601	133615109	40508	-	ENSMUSG00000003644	protein_coding	ENSMUSG00000003644	Rps6ka1	ensembl_havana	18	ensembl_havana | havana	7990.13	6595.33	7460.78	8140.44	8475.03	7284.22	10069.6	3200.28	5592.71	5134	4629.07	6250.31	4403.77	3665.58	3971.93
2	127050306	127082372	32066	+	ENSMUSG00000003660	protein_coding	ENSMUSG00000003660	Snrnp200	ensembl_havana	11	ensembl_havana | havana	5326.61	4868.93	4994.52	5708.55	4608.88	5086.08	5332.6	1565.25	2693.27	3213.12	3236.2	8743.1	6749.96	6275.17	6742.23
2	127082858	127089737	6879	-	ENSMUSG00000003662	protein_coding	ENSMUSG00000003662	Ciao1	ensembl_havana	11	ensembl_havana | havana	753.562	600.492	679.344	692.792	698.434	633.187	673.087	306.05	490.417	472.731	405.21	695.287	867.194	690.103	721.165
19	8751851	8763782	11931	-	ENSMUSG00000003680	protein_coding	ENSMUSG00000003680	Taf6l	ensembl_havana	17	ensembl | havana	350.913	379.904	408.882	385.095	362.791	349.676	370.262	118.471	223.769	195.145	193.737	477.443	472.374	394.848	423.56
1	121232082	121260319	28237	-	ENSMUSG00000003721	protein_coding	ENSMUSG00000003721	Insig2	ensembl_havana	15	ensembl_havana | havana	290.178	322.306	346.431	236.909	228.287	210.344	314.277	61.0306	172.852	176.361	154.171	153.399	177.14	161.288	174.254
4	129537773	129566561	28788	-	ENSMUSG00000003731	protein_coding	ENSMUSG00000003731	Kpna6	ensembl_havana	14	ensembl_havana | havana	1156.21	1067.41	1229.41	1260.05	1000.76	1184.4	1244.38	412.854	750.363	759.706	749.024	1503.13	1672.69	1426.92	1499.76
10	53780881	53952706	171825	-	ENSMUSG00000003746	protein_coding	ENSMUSG00000003746	Man1a	ensembl_havana	17	ensembl_havana | havana	2698.19	4188.74	2406.43	2593.71	1394.4	2267.4	2287.74	770.062	1483.31	1267.92	1560.81	2193.87	2262.28	2081.76	1946.15
7	26906597	26928087	21490	-	ENSMUSG00000003752	protein_coding	ENSMUSG00000003752	Itpkc	ensembl_havana	10	ensembl_havana | havana	175.29	241.048	175.702	148.932	166.909	180.399	176.844	65.1642	86.0731	65.607	103.267	232.002	174.564	169.042	138.14
7	26932448	26957376	24928	+	ENSMUSG00000003762	protein_coding	ENSMUSG00000003762	Coq8b	ensembl_havana	14	ensembl_havana | havana	356.305	390.348	364.169	385.629	377.058	394.668	459.266	121.865	184.817	200.363	201.923	497.86	400.708	396.611	332.657
18	34731668	34757655	25987	-	ENSMUSG00000003778	protein_coding	ENSMUSG00000003778	Brd8	ensembl_havana	15	ensembl_havana | havana	2357.41	1683.83	1960.29	2519.15	2005.23	2012.83	2077.79	1065.34	1417.65	1735.43	1600.38	2880.1	2444.71	2499.52	2558.35
18	34757666	34766331	8665	+	ENSMUSG00000003779	protein_coding	ENSMUSG00000003779	Kif20a	ensembl_havana	17	ensembl_havana | havana	2222.6	861.983	1894.03	2443.11	2087.02	1961.62	2415.34	1115	1707.59	1983.8	1749.18	2861.69	2479.93	2084.07	2297.47
8	85583618	85595887	12269	+	ENSMUSG00000003808	protein_coding	ENSMUSG00000003808	Farsa	ensembl_havana	19	ensembl_havana | havana	1052.74	900.74	1261.51	1272.33	1305.55	1070.06	1117.15	418.239	699.448	708.575	678.078	2200.23	2763.75	2458.11	2057.77
8	85613022	85620551	7529	-	ENSMUSG00000003809	protein_coding	ENSMUSG00000003809	Gcdh	ensembl_havana	15	ensembl | ensembl_havana | havana	287.928	253.678	250.951	291.652	301.092	220.052	306.642	136.421	233.149	280.717	263.319	619.948	655.686	607.255	622.615
4	116163959	116321381	157422	-	ENSMUSG00000003810	protein_coding	ENSMUSG00000003810	Mast2	ensembl_havana	14	ensembl | havana	707.45	553.924	637.094	745.646	673.754	734.588	863.94	438.88	852.201	798.319	1077.83	1189.07	940.346	1042.65	1104.91
8	85635189	85649545	14356	+	ENSMUSG00000003812	protein_coding	ENSMUSG00000003812	Dnase2a	ensembl_havana	14	ensembl_havana | havana	1155.88	1041.16	1129.67	1306.03	984.313	1040.29	1352.16	323.748	610.461	630.573	573.902	1023.88	1100.89	1032.44	927.746
8	85560648	85567295	6647	-	ENSMUSG00000003813	protein_coding	ENSMUSG00000003813	Rad23a	ensembl_havana	16	ensembl_havana | havana	858.354	840.416	682.089	868.989	893.93	809.165	1033.62	1467.58	2658.44	2902.55	2952.24	1380.46	1157.5	921.973	1079.43
8	85568479	85573564	5085	-	ENSMUSG00000003814	protein_coding	ENSMUSG00000003814	Calr	ensembl_havana	9	ensembl_havana | havana	11021	10740	8052.19	13663.9	17608.4	8826.75	10648.5	5819.44	8116.08	10666.2	7587.12	30310.4	37841.2	29691.6	28618.1
8	85598740	85614851	16111	+	ENSMUSG00000003824	protein_coding	ENSMUSG00000003824	Syce2	ensembl_havana	13	ensembl | ensembl_havana | havana	334.042	148.285	435.996	515.348	262.838	326.842	338.452	132.831	262.628	273.411	244.218	668.964	1114.84	764.137	694.405
8	108020102	108106150	86048	+	ENSMUSG00000003847	protein_coding	ENSMUSG00000003847	Nfat5	ensembl_havana	17	ensembl | havana	1348.54	1337.02	1092.53	855.136	1157.48	1556.54	1456.87	379.646	675.328	613.611	1180.16	875.917	451.223	934.239	1292.87
8	108139118	108151684	12566	-	ENSMUSG00000003848	protein_coding	ENSMUSG00000003848	Nob1	ensembl_havana	15	ensembl_havana | havana	325.043	306.374	476.554	369.05	354.153	280.459	318.094	105.906	166.152	189.927	160.993	894.98	1030.24	755.321	696.366
8	108114857	108129839	14982	-	ENSMUSG00000003849	protein_coding	ENSMUSG00000003849	Nqo1	ensembl_havana	9	ensembl_havana	5.6236	31.8629	16.0541	35.8667	67.869	21.5737	87.7939	99.6234	249.228	182.622	231.939	118.907	236.187	199.187	214.717
7	45084268	45106044	21776	+	ENSMUSG00000003865	protein_coding	ENSMUSG00000003865	Gys1	ensembl_havana	17	ensembl_havana | havana	1004.88	1278.33	1145.41	1263.83	2143.39	1073.52	1879.25	663.555	1384.24	1112.83	993.97	1046.27	676.827	751.445	669.211
7	45071184	45087521	16337	-	ENSMUSG00000003868	protein_coding	ENSMUSG00000003868	Ruvbl2	ensembl_havana	15	ensembl_havana | havana	967.881	638.351	858.823	1289.32	1224.13	944.695	1305.52	393.708	716.776	840.711	665.076	3297.92	3200.8	2467.25	2141.7
7	45111121	45116323	5202	-	ENSMUSG00000003873	protein_coding	ENSMUSG00000003873	Bax	ensembl_havana	12	ensembl_havana | havana	772.497	824.758	771.41	671.052	721.881	646.134	778.599	175.912	305.506	305.762	278.326	805.567	707.68	591.289	520.724
15	9505874	9530263	24389	-	ENSMUSG00000003882	protein_coding	ENSMUSG00000003882	Il7r	ensembl_havana	6	ensembl_havana | havana	401.523	606.619	292.355	172.726	286.284	427.16	127.238	255.79	464.957	402.812	653.521	135.245	141.007	156.881	160.548
10	71061294	71074111	12817	-	ENSMUSG00000003923	protein_coding	ENSMUSG00000003923	Tfam	ensembl_havana	15	ensembl_havana | havana	687.205	638.483	821.294	829.652	602.184	658	636.188	207.324	434.139	505.081	409.303	851.409	1304.31	1124.61	1158.43
17	33548316	33577853	29537	-	ENSMUSG00000003929	protein_coding	ENSMUSG00000003929	Zfp81	ensembl_havana	12	ensembl_havana | havana	255.311	226.717	248.416	366.218	190.033	272.908	260.837	128.344	266.647	207.668	240.125	285.921	637.176	577.288	575.624
11	90140282	90169416	29134	+	ENSMUSG00000003948	protein_coding	ENSMUSG00000003948	Mmd	ensembl_havana	18	ensembl_havana | havana	233.947	353.41	288.613	343.913	281.358	325.854	309.406	83.2765	234.307	211.842	193.737	236.145	524.755	441.149	398.924
11	90227362	90281722	54360	-	ENSMUSG00000003949	protein_coding	ENSMUSG00000003949	Hlf	ensembl_havana	17	ensembl_havana | havana	71.982	56.3728	64.2165	104.768	55.5292	66.8786	75.0702	46.6704	87.0959	67.8311	137.799	359.444	222.086	390.441	330.234
16	35864131	35891965	27834	-	ENSMUSG00000003955	protein_coding	ENSMUSG00000003955	Fam162a	ensembl_havana	9	ensembl_havana | havana	176.581	161.216	165.611	186.885	269.008	157.165	194.673	78.9807	121.934	158.621	96.8685	440.228	608.094	469.631	516.77
15	76788278	76790515	2237	+	ENSMUSG00000003970	protein_coding	ENSMUSG00000003970	Rpl8	ensembl_havana	10	ensembl_havana | havana	21791.3	17404	25332.1	17977	21556.9	16016.3	18284.1	6588.02	11351.7	10120.2	9053.59	31915.3	31971.7	24027.8	25454.2
13	91608402	91851549	243147	+	ENSMUSG00000003992	protein_coding	ENSMUSG00000003992	Ssbp2	ensembl_havana	16	ensembl_havana | havana	351.503	284.801	274.045	404.294	261.32	460.028	305.884	163.298	217.873	229.577	207.853	382.451	751.37	707.927	671.019
11	26336135	26421877	85742	+	ENSMUSG00000004018	protein_coding	ENSMUSG00000004018	Fancl	ensembl_havana	10	ensembl_havana | havana	292.265	282.198	238.05	330.533	188.578	242.894	241.118	114.419	234.426	262.849	240.782	218.907	324.85	318.326	323.653
3	107803137	107806003	2866	+	ENSMUSG00000004032	protein_coding	ENSMUSG00000004032	Gstm5	ensembl_havana	11	ensembl_havana | havana	30.3674	13.4805	49.8523	60.407	43.1894	10.7869	16.5409	121.164	213.05	293.202	290.541	505.581	783.372	671.325	892.629
3	107833650	107839134	5484	-	ENSMUSG00000004035	protein_coding	ENSMUSG00000004035	Gstm7	ensembl_havana	13	ensembl_havana | havana	5.6236	7.35298	16.8991	32.0912	3.70195	6.47212	11.4514	7.18007	8.03962	15.6533	12.2791	33.5844	22.9137	17.6271	24.8002
11	100775924	100830367	54443	-	ENSMUSG00000004040	protein_coding	ENSMUSG00000004040	Stat3	ensembl_havana	17	ensembl_havana | havana	5928.32	5371.31	4408.12	4719.32	6895.4	6527	7568.18	1481.8	3111.33	3382.19	3072.53	2603.24	2210.3	2042.97	2139.34
11	100750177	100775996	25819	+	ENSMUSG00000004043	protein_coding	ENSMUSG00000004043	Stat5a	ensembl_havana	15	ensembl | ensembl_havana | havana	1632.01	2012.23	1556.24	2002.76	2492.24	1957.35	1843.18	394.139	741.601	817.728	780.414	2859.32	3211.59	2945.59	2486.6
11	100847559	100861714	14155	-	ENSMUSG00000004044	protein_coding	ENSMUSG00000004044	Cavin1	ensembl_havana	10	ensembl_havana | havana	20.2449	35.5394	38.8679	37.7544	18.5097	23.7311	35.6265	50.2605	76.3764	69.9182	77.7676	270.49	307.572	258.237	219.938
19	5738770	5752894	14124	+	ENSMUSG00000004054	protein_coding	ENSMUSG00000004054	Map3k11	ensembl_havana	10	ensembl_havana | havana	2005.85	2173.84	2476.99	2520.05	2197.12	2769.32	2982.4	754.805	1480.07	1232.25	1233.33	1892.42	1699.99	1212.71	1038.29
7	27290977	27340252	49275	+	ENSMUSG00000004056	protein_coding	ENSMUSG00000004056	Akt2	ensembl_havana	16	ensembl | ensembl_havana | havana	1760.69	1986.2	1932.11	2204.26	1872.99	2063.7	2677.7	767.687	1653.36	1558.53	1449.94	2065.62	2080.55	1700.83	1692.04
16	4457853	4525560	67707	+	ENSMUSG00000004069	protein_coding	ENSMUSG00000004069	Dnaja3	ensembl_havana	18	ensembl_havana | havana	772.684	610.298	779.045	844.757	845.281	811.175	851.221	298.87	542.674	557.257	508.899	1909.76	1999.63	1628.77	1836.55
16	4544225	4584607	40382	+	ENSMUSG00000004070	protein_coding	ENSMUSG00000004070	Hmox2	ensembl_havana	16	ensembl_havana | havana	1959.77	1146.87	1395.24	1443.61	1251.98	1317.41	1466.55	552.985	846.428	827.157	599.448	1403.9	1001.66	828.131	1014.82
16	4568212	4608157	39945	-	ENSMUSG00000004071	protein_coding	ENSMUSG00000004071	Cdip1	ensembl_havana	14	ensembl_havana | havana	826.568	742.922	912.861	833.305	448.874	1109.22	663.998	226.481	448.021	466.089	506.289	609.694	743.917	897.125	714.728
2	72115981	72272955	156974	+	ENSMUSG00000004085	protein_coding	ENSMUSG00000004085	Map3k20	ensembl_havana	15	ensembl_havana | havana	1537.49	984.073	1955.22	2143.5	1647.37	1583.51	1955.64	662.361	1157.71	1261.66	1358.89	3518.17	2593.65	2586.78	2887.26
9	14411913	14421874	9961	+	ENSMUSG00000004096	protein_coding	ENSMUSG00000004096	Cwc15	ensembl_havana	10	ensembl_havana | havana	1942.39	1321.09	1400.94	1563.02	1790.52	1395.82	1617.2	718.008	1029.07	891.199	750.388	1553.05	1469.99	1092.89	1407.72
9	20818505	20871185	52680	-	ENSMUSG00000004099	protein_coding	ENSMUSG00000004099	Dnmt1	ensembl_havana	17	ensembl_havana | havana	7108.51	3935.14	6251.33	9269.55	6891.55	6683.49	7442.5	3044.29	4708.47	5598.6	5475.16	16426.3	12897.6	11023	11131.4
9	20799471	20803475	4004	+	ENSMUSG00000004100	protein_coding	ENSMUSG00000004100	Ppan	ensembl_havana	13	ensembl_havana | havana	810.025	665.444	1079.85	1148.76	831.703	670.435	771.244	298.096	454.239	491.516	476.89	3217.1	2978.35	2493.09	2493.08
2	33106081	33137730	31649	+	ENSMUSG00000004105	protein_coding	ENSMUSG00000004105	Angptl2	ensembl_havana	9	ensembl_havana | havana	458.886	433.825	648.08	322.8	605.885	509.14	319.366	67.3131	95.1355	66.7876	91.4111	182.445	142.77	118.983	170.991
1	154266477	154760248	493771	-	ENSMUSG00000004110	protein_coding	ENSMUSG00000004110	Cacna1e	ensembl_havana	18	ensembl | havana	624.219	562.503	388.679	218.975	77.7409	465.993	162.864	252.2	329.624	365.244	487.07	114.368	22.9137	60.8136	118.78
3	137849209	137865583	16374	+	ENSMUSG00000004127	protein_coding	ENSMUSG00000004127	Trmt10a	ensembl_havana	13	ensembl_havana | havana	111.347	67.4023	76.9547	126.482	98.7186	103.699	75.0702	57.4405	97.7659	103.312	140.528	127.991	280.048	222.754	228.077
15	76544058	76552397	8339	+	ENSMUSG00000004187	protein_coding	ENSMUSG00000004187	Kifc2	ensembl_havana	12	ensembl_havana | havana	16.8708	35.5394	6.75963	22.6526	25.9136	28.0459	17.8411	17.9502	22.7789	17.7404	9.55041	29.1824	12.3381	14.9831	27.4107
10	60113449	60138377	24928	+	ENSMUSG00000004207	protein_coding	ENSMUSG00000004207	Psap	ensembl_havana	15	ensembl | ensembl_havana	110781	104275	100837	112762	68859.2	128295	99153.5	11772.7	29216	23101.5	23257.2	18041.7	13088.7	8964.26	10433.8
X	73436896	73497461	60565	+	ENSMUSG00000004221	protein_coding	ENSMUSG00000004221	Ikbkg	ensembl_havana	17	ensembl | ensembl_havana | havana	1072.5	1260.66	1076.62	1297.36	895.002	1125.6	1331.89	413.458	894.509	769.951	798.518	955.075	1030.57	1018.33	852.898
3	99048384	99146503	98119	+	ENSMUSG00000004233	protein_coding	ENSMUSG00000004233	Wars2	ensembl_havana	15	ensembl_havana | havana	176.581	133.579	140.262	170.839	136.972	218.973	176.86	51.158	105.855	75.136	83.225	208.768	295.234	268.814	267.581
6	124719507	124733488	13981	-	ENSMUSG00000004263	protein_coding	ENSMUSG00000004263	Atn1	ensembl_havana	16	ensembl_havana | havana	270.613	208.564	286.748	202.378	320.815	259.498	361.722	78.9777	124.777	122.871	165.659	540.648	80.6163	243.057	251.384
6	124689299	124693914	4615	+	ENSMUSG00000004264	protein_coding	ENSMUSG00000004264	Phb2	ensembl_havana	18	ensembl_havana | havana	2021.99	1824.97	2076.72	2124.68	2287.61	1771.49	2120.32	728.822	1192.14	1325.33	1238.19	3746.25	5004.1	3661.14	3857.46
6	124697670	124715678	18008	-	ENSMUSG00000004266	protein_coding	ENSMUSG00000004266	Ptpn6	ensembl_havana	16	ensembl_havana | havana	12528	10371.8	7794.53	11001.6	10440.3	10241.5	12168.4	3977.35	5999.47	5888.25	4670.35	4317.54	3630.61	2968.73	3177.58
6	124681048	124689142	8094	-	ENSMUSG00000004268	protein_coding	ENSMUSG00000004268	Emg1	ensembl_havana	12	ensembl_havana | havana	1761.08	1308.21	1573.82	1670.78	1245.22	1649.26	1786.72	488.904	969.625	1024.13	1116.55	1998.08	2535.82	2195.72	2051.48
6	124639990	124681382	41392	+	ENSMUSG00000004270	protein_coding	ENSMUSG00000004270	Lpcat3	ensembl_havana	14	ensembl_havana | havana	699.812	565.572	583.349	715.294	721.742	559.889	821.65	483.098	872.785	885.574	966.799	799.396	969.966	888.16	967.608
6	29467717	29470512	2795	+	ENSMUSG00000004285	protein_coding	ENSMUSG00000004285	Atp6v1f	ensembl_havana	13	ensembl_havana | havana	1421.65	1470.55	1536.98	1260.89	1140.2	1310.52	1472.14	279.097	876.224	712.748	623.459	717.069	1061.07	883.999	722.463
X	7020049	7185598	165549	-	ENSMUSG00000004317	protein_coding	ENSMUSG00000004317	Clcn5	ensembl_havana	15	ensembl_havana | havana	925.643	530.64	778.204	648.432	521.974	1037.69	824.499	137.319	253.248	244.192	320.621	241.444	251.169	258.237	325.665
8	61363423	61436335	72912	-	ENSMUSG00000004319	protein_coding	ENSMUSG00000004319	Clcn3	ensembl_havana	16	ensembl_havana | havana	1124.72	1289.22	1255.61	1012.76	1178.45	1081.92	1105.69	1525.76	2285.94	2709.23	2987.92	1528.54	1220.6	1248	1640.08
6	56046789	56629473	582684	-	ENSMUSG00000004347	protein_coding	ENSMUSG00000004347	Pde1c	ensembl_havana	18	ensembl_havana | havana	2.24944	2.45099	0.844954	12.2702	30.8496	3.23606	3.81713	83.4683	52.2575	45.9164	45.0234	24.5075	13.2194	32.6102	26.1054
10	88582469	88662667	80198	-	ENSMUSG00000004356	protein_coding	ENSMUSG00000004356	Utp20	ensembl_havana	9	ensembl_havana | havana	1117.97	900.739	1168.57	1383.7	1089.61	1059.27	1222.75	279.125	411.36	601.088	603.04	2921.85	3073.96	2824.75	3015.17
10	88510634	88520878	10244	-	ENSMUSG00000004359	protein_coding	ENSMUSG00000004359	Spic	ensembl_havana	17	ensembl_havana | havana	35.991	88.2357	37.178	33.979	39.4874	32.3606	29.2646	38.5929	116.574	122.096	75.0389	5.44611	7.93165	8.81356	15.6633
1	80242640	80318198	75558	-	ENSMUSG00000004364	protein_coding	ENSMUSG00000004364	Cul3	ensembl_havana	15	ensembl_havana | havana	2851.17	2873.79	2758.8	3613.13	3241.65	3146.57	3593.14	1333.7	2632.99	2334.43	2322.12	2103.11	3043.11	2607.92	2834.43
8	73541227	74080169	538942	-	ENSMUSG00000004383	protein_coding	ENSMUSG00000004383	Large1	ensembl_havana	19	ensembl | havana	239.565	240.197	220.533	220.863	213.479	223.288	166.681	40.3879	54.9374	72.0053	39.566	138.876	137.482	122.509	144.885
11	6208919	6217773	8854	-	ENSMUSG00000004393	protein_coding	ENSMUSG00000004393	Ddx56	ensembl_havana	11	ensembl_havana | havana	526.369	508.581	620.198	750.369	549.122	542.58	723.982	191.169	337.664	381.941	301.52	1466.82	1538.74	1245.36	1277.86
11	6220369	6224871	4502	-	ENSMUSG00000004394	protein_coding	ENSMUSG00000004394	Tmed4	ensembl_havana	13	ensembl_havana | havana	704.073	791.669	727.504	860.799	602.184	750.766	753.246	169.629	450.219	364.201	291.97	731.596	1005.56	784.406	706.805
6	120868891	120893815	24924	-	ENSMUSG00000004446	protein_coding	ENSMUSG00000004446	Bid	ensembl_havana	13	ensembl_havana | havana	1431.08	1140.59	1325.09	2101.16	1248.44	1392.04	1816.52	380.799	947.658	805.768	672.673	1132.38	1554.97	1263.04	1264.07
1	119398035	119432525	34490	-	ENSMUSG00000004451	protein_coding	ENSMUSG00000004451	Ralb	ensembl_havana	15	ensembl_havana | havana	1982.88	2025.74	1857.2	1932.08	1985.48	2178.94	3012.98	697.364	1791.5	1301.31	1171.97	841.425	440.647	445.966	473.161
5	122296341	122313337	16996	+	ENSMUSG00000004455	protein_coding	ENSMUSG00000004455	Ppp1cc	ensembl_havana	17	ensembl_havana | havana	3032.69	2433.56	2541.74	3516.35	2983.1	3196.45	3557.02	1274.9	3075.61	2913.65	2801.71	1765.76	4940.75	3884.79	3244.3
16	22676595	22698385	21790	+	ENSMUSG00000004460	protein_coding	ENSMUSG00000004460	Dnajb11	ensembl_havana	18	ensembl | ensembl_havana | havana	2231.47	1660.53	1732.19	1867.92	2655.52	1609.39	1890.74	769.16	1306.44	1445.32	1111.94	2142.12	1966.2	1740.66	2035.53
16	22631964	22676420	44456	-	ENSMUSG00000004462	protein_coding	ENSMUSG00000004462	Tbccd1	ensembl_havana	8	ensembl_havana | havana	373.407	276.962	334.601	406.804	333.175	389.406	338.452	218.992	320.245	454.99	448.87	560.949	698.866	657.491	699.627
7	43952111	43956327	4216	-	ENSMUSG00000004473	protein_coding	ENSMUSG00000004473	Clec11a	ensembl_havana	11	ensembl_havana	73.1067	78.4317	79.4257	96.2737	71.571	80.9015	104.335	17.0527	33.4984	38.6116	32.7443	118.907	112.806	85.4916	82.8848
7	12699765	12708164	8399	+	ENSMUSG00000004500	protein_coding	ENSMUSG00000004500	Zfp324	ensembl_havana	10	ensembl_havana | havana	355.411	318.629	333.757	367.162	307.262	335.471	296.463	104.111	175.532	159.664	199.194	450.213	525.253	430.103	443.792
7	96730793	96958154	227361	+	ENSMUSG00000004508	protein_coding	ENSMUSG00000004508	Gab2	ensembl_havana	7	ensembl_havana | havana	2054.85	1387.26	1780.33	1653.65	1912.68	1851.03	1926.38	335.668	692.747	654.309	577.118	1369.69	817.841	861.964	904.549
5	113980497	114046820	66323	-	ENSMUSG00000004530	protein_coding	ENSMUSG00000004530	Coro1c	ensembl_havana	13	ensembl_havana | havana	3529.05	2962.68	3536.38	3762.15	3302.14	3595.31	4149.31	953.718	1721.37	1814.72	1674.04	3943.42	3286.13	2606.99	2628.08
6	52690714	52743766	53052	+	ENSMUSG00000004535	protein_coding	ENSMUSG00000004535	Tax1bp1	ensembl_havana	13	ensembl_havana | havana	5507.76	4662.99	4548.64	5718.87	5954.76	4902.61	5776.59	2905.24	4859.92	4529.04	4469.56	6501.72	5686.11	5122.44	5091.24
1	131566044	131603244	37200	+	ENSMUSG00000004552	protein_coding	ENSMUSG00000004552	Ctse	ensembl_havana	17	ensembl_havana | havana	397.026	785.544	490.074	464.379	339.345	485.409	617.102	4069.29	7743.15	8814.19	9762.09	2469.81	1860.43	1947.82	3110.52
14	52142728	52151616	8888	-	ENSMUSG00000004558	protein_coding	ENSMUSG00000004558	Ndrg2	ensembl_havana	16	ensembl_havana | havana	41.6146	34.3139	81.1156	69.8456	74.0389	29.1245	39.4437	45.7729	113.895	92.8765	96.8685	77.1533	96.0612	87.2543	129.222
14	52122299	52130497	8198	+	ENSMUSG00000004561	protein_coding	ENSMUSG00000004561	Mettl17	ensembl_havana	15	ensembl_havana | havana	310.538	403.188	283.904	322.8	222.117	268.593	264.654	69.1081	79.0562	100.181	109.148	314.107	315.504	320.814	262.52
14	52222176	52243709	21533	+	ENSMUSG00000004562	protein_coding	ENSMUSG00000004562	Arhgef40	ensembl_havana	17	ensembl_havana | havana	264.309	601.718	212.931	374.715	130.802	286.931	208.67	94.561	131.456	105.515	136.519	535.569	364.964	337.584	355.822
8	3565384	3594268	28884	+	ENSMUSG00000004565	protein_coding	ENSMUSG00000004565	Pnpla6	ensembl_havana	16	ensembl | ensembl_havana | havana	392.527	582.111	427.547	353.003	403.512	478.937	412.25	201.939	414.041	421.596	499.35	737.95	705.918	721.83	693.1
8	3550457	3565233	14776	+	ENSMUSG00000004567	protein_coding	ENSMUSG00000004567	Mcoln1	ensembl_havana	17	ensembl_havana | havana	448.763	550.248	584.708	471.929	361.557	654.763	451.693	183.989	308.185	274.455	332.9	483.796	390.414	360.475	387.666
8	3403415	3506602	103187	+	ENSMUSG00000004568	protein_coding	ENSMUSG00000004568	Arhgef18	ensembl_havana	14	ensembl_havana | havana	4044.52	3699.77	3711.04	4601.28	2818.4	5307.21	4471.19	1252.02	1952.28	1797.01	2199.32	3791.41	2654.46	2595.62	2346.22
3	142496663	142587766	91103	-	ENSMUSG00000004591	protein_coding	ENSMUSG00000004591	Pkn2	ensembl_havana	17	ensembl_havana | havana	1371.03	1500	1040.98	1473.36	1412.91	1459.46	1294.01	1035.73	1893.33	1885.71	2181.59	1397.84	1857.77	1664	1814.97
7	43173640	43193853	20213	-	ENSMUSG00000004609	protein_coding	ENSMUSG00000004609	Cd33	ensembl_havana	12	ensembl_havana | havana	2217.95	2841.93	2844.94	3101.52	4637.32	3801.28	6827.6	1704.36	3974.27	3374.85	4251.31	214.214	87.2482	133.966	99.8533
7	43093507	43107225	13718	+	ENSMUSG00000004610	protein_coding	ENSMUSG00000004610	Etfb	ensembl_havana	5	ensembl_havana | havana	1624.09	988.976	1913.84	1463.64	1468.44	929.832	1556.13	434.393	785.203	832.328	637.149	3957.52	2386.55	1849.36	1978.82
7	43086497	43087674	1177	+	ENSMUSG00000004612	protein_coding	ENSMUSG00000004612	Nkg7	ensembl_havana	10	ensembl_havana | havana	697.326	672.8	690.323	798.503	788.513	172.59	552.212	289.895	680.687	585.435	485.707	1800.83	1473.54	1307.05	1167.57
8	3680955	3693645	12690	+	ENSMUSG00000004626	protein_coding	ENSMUSG00000004626	Stxbp2	ensembl_havana	15	ensembl_havana | havana	2718.44	2867.67	2476.56	2774.93	3215.75	2272.79	3764.93	1068.04	2125.14	1992.15	1544.44	1943.36	1668.29	1400.48	1380.32
8	3673371	3675546	2175	-	ENSMUSG00000004630	protein_coding	ENSMUSG00000004630	Pcp2	ensembl_havana	19	ensembl_havana | havana	6.07314	19.0619	11.7218	9.58079	14.8812	12.3549	16.9587	6.41476	12.0777	11.3337	35.1078	3.64261	4.98899	15.9428	3.81174
6	4674350	4747208	72858	-	ENSMUSG00000004631	protein_coding	ENSMUSG00000004631	Sgce	ensembl_havana	16	ensembl_havana | havana	12.3719	1.2255	5.06972	8.49474	20.9777	2.15737	6.36188	34.1053	30.8185	16.6969	34.1086	22.6921	38.777	34.3729	29.3686
6	54016539	54278796	262257	+	ENSMUSG00000004633	protein_coding	ENSMUSG00000004633	Chn2	ensembl_havana	18	ensembl_havana | havana	394.362	404.413	395.846	520.515	224.585	363.052	291.374	48.2836	126.938	102.013	103.69	229.425	287.139	226.524	265.53
8	115166395	116079448	913053	+	ENSMUSG00000004637	protein_coding	ENSMUSG00000004637	Wwox	ensembl_havana	16	ensembl_havana | havana	224.944	144.608	246.727	220.863	223.351	296.639	192.129	91.5459	147.393	113.748	137.799	350.367	274.964	297.017	290.423
5	33792296	33809919	17623	-	ENSMUSG00000004642	protein_coding	ENSMUSG00000004642	Slbp	ensembl_havana	14	ensembl_havana | havana	2226.84	1433.83	2199.89	2537.91	2024.69	2503.56	2327.02	1392.89	2698.42	2611.99	2937.41	2958.16	3433.41	2903.2	3000.73
6	55313417	55325541	12124	+	ENSMUSG00000004655	protein_coding	ENSMUSG00000004655	Aqp1	ensembl_havana	6	ensembl_havana	82.1045	223.04	147.867	101.937	104.889	58.2491	34.3542	4107.9	9455.93	10447	11302.2	8113.8	9196.31	7912.82	8078.98
9	57697636	57744077	46441	-	ENSMUSG00000004661	protein_coding	ENSMUSG00000004661	Arid3b	ensembl_havana	16	ensembl | havana	522.626	535.542	538.236	398.309	308.496	543.252	577.659	189.374	320.245	305.762	412.032	191.481	75.7914	123.39	102.464
10	79824418	79831897	7479	+	ENSMUSG00000004665	protein_coding	ENSMUSG00000004665	Cnn2	ensembl_havana	11	ensembl_havana | havana	10371	11182.6	9162.7	9324.39	11705.6	9250.82	14992.4	5123.04	9892.75	8046.86	6416.51	3283.14	2188.25	2150.51	2156.96
10	79871783	79875630	3847	-	ENSMUSG00000004667	protein_coding	ENSMUSG00000004667	Polr2e	ensembl_havana	19	ensembl_havana | havana	785.055	1196.09	895.653	897.613	694.733	615.931	843.586	224.377	471.658	388.203	362.916	1405.1	1470	1065.56	894.764
11	9141942	9634260	492318	+	ENSMUSG00000004668	protein_coding	ENSMUSG00000004668	Abca13	ensembl_havana	15	ensembl_havana | havana	3256.06	4397.08	2801.87	3496.06	8468.82	4344.95	7929.44	1637.95	3471.78	3251.72	3811.98	225.106	123.381	187.729	221.244
8	71725358	71813358	88000	+	ENSMUSG00000004677	protein_coding	ENSMUSG00000004677	Myo9b	ensembl_havana	18	ensembl | ensembl_havana | havana	4895.93	5173.74	4256.75	5715.72	4753.33	5794.73	5934.37	1869.52	3116.68	3174.48	3020.66	4649	3211.46	3088.26	3007.79
12	34097579	34967095	869516	-	ENSMUSG00000004698	protein_coding	ENSMUSG00000004698	Hdac9	ensembl_havana	12	ensembl_havana | havana	756.936	601.718	474.864	532.337	619.459	752.924	360.082	151.679	277.367	204.537	300.156	239.629	216.798	166.576	159.896
1	171416192	171434979	18787	-	ENSMUSG00000004707	protein_coding	ENSMUSG00000004707	Ly9	ensembl_havana	15	ensembl_havana | havana	1198.95	993.879	693.708	1380.86	756.433	1314.91	1045.9	284.51	590.912	461.252	478.885	592.72	638.938	374.577	478.382
1	171386761	171437315	50554	+	ENSMUSG00000004709	protein_coding	ENSMUSG00000004709	Cd244a	ensembl_havana	15	ensembl_havana | havana	1050.49	1840.72	843.266	767.357	612.057	1544.67	1036.99	107.701	183.571	284.891	281.055	401.197	341.06	460.067	372.655
17	57665691	57790528	124837	+	ENSMUSG00000004730	protein_coding	ENSMUSG00000004730	Adgre1	ensembl_havana	16	ensembl | ensembl_havana | havana	2259.59	2541.71	1199.84	1724.43	1862.07	2085.15	2426.45	402.983	1023.71	871.374	911.384	140.691	84.6043	114.576	157.938
11	4041480	4045446	3966	-	ENSMUSG00000004748	protein_coding	ENSMUSG00000004748	Mtfp1	ensembl_havana	6	ensembl_havana | havana	68.6079	22.0589	33.7982	50.9684	92.5487	24.8098	45.8055	55.6455	101.835	91.8329	102.326	296.813	386.888	344.61	349.813
1	33758968	33781646	22678	+	ENSMUSG00000004768	protein_coding	ENSMUSG00000004768	Rab23	ensembl_havana	15	ensembl_havana | havana	133.842	88.2357	171.526	131.196	212.245	146.701	273.561	76.2882	121.934	168.012	126.884	109.83	118.094	111.051	117.474
9	64622581	64645041	22460	-	ENSMUSG00000004771	protein_coding	ENSMUSG00000004771	Rab11a	ensembl_havana	13	ensembl_havana | havana	1276.56	1438.73	1029.16	1276.1	1026.67	1324.63	1702.44	519.657	1285	1007.03	1025.99	570.026	1097.22	898.101	836.679
12	85266255	85273403	7148	+	ENSMUSG00000004788	protein_coding	ENSMUSG00000004788	Eif2b2	ensembl_havana	12	ensembl_havana | havana	830.043	827.21	856.783	634.272	884.764	635.345	853.766	215.402	403.321	380.897	358.822	863.209	856.618	672.475	654.593
12	85157607	85181620	24013	+	ENSMUSG00000004789	protein_coding	ENSMUSG00000004789	Dlst	ensembl_havana	11	ensembl_havana | havana	3494.45	2879.92	3680.69	3187.43	3334.25	3072.12	3387.08	1519.48	2571.31	2322.97	2365.77	4876.88	3806.32	3929.93	4233.03
11	61666475	61745900	79425	-	ENSMUSG00000004798	protein_coding	ENSMUSG00000004798	Ulk2	ensembl_havana	15	ensembl_havana | havana	751.314	708.335	562.738	883.451	753.963	1003.18	867.763	304.255	569.473	521.777	615.318	674.41	716.494	719.184	790.995
5	108794559	108817539	22980	-	ENSMUSG00000004815	protein_coding	ENSMUSG00000004815	Dgkq	ensembl_havana	13	ensembl_havana | havana	405.745	495.018	469.914	506.333	354.59	536.381	395.993	99.2769	222.141	201.197	181.246	473.739	469.169	501.974	440.758
11	61544091	61563611	19520	+	ENSMUSG00000004837	protein_coding	ENSMUSG00000004837	Grap	ensembl_havana	3	ensembl_havana | havana	600.6	794.121	674.273	277.495	477.551	434.711	201.035	140.909	272.007	200.363	263.319	37.2151	53.759	18.5085	61.3478
16	65336014	65359613	23599	-	ENSMUSG00000004843	protein_coding	ENSMUSG00000004843	Chmp2b	ensembl_havana	8	ensembl_havana | havana	1042.62	1064.96	857.625	1372.36	751.497	1122.91	1192.21	229.761	570.812	518.648	485.707	588.181	832.816	697.152	570.405
5	137015873	137025503	9630	+	ENSMUSG00000004846	protein_coding	ENSMUSG00000004846	Plod3	ensembl_havana	11	ensembl_havana | havana	3052.43	1949.26	2168.78	2639.55	2616.47	2825.38	4160.67	646.261	1289.58	1180.89	1054.48	2732.2	2169.69	1682.97	1706.46
5	137063847	137074990	11143	-	ENSMUSG00000004849	protein_coding	ENSMUSG00000004849	Ap1s1	ensembl_havana	15	ensembl_havana | havana	618.597	425.247	695.396	701.29	603.417	458.442	792.69	155.269	351.064	338.112	274.233	934.914	1016.13	758.848	686.573
17	28988271	28999208	10937	+	ENSMUSG00000004864	protein_coding	ENSMUSG00000004864	Mapk13	ensembl_havana	14	ensembl_havana | havana	519.62	794.121	588.088	531.393	1285.81	785.284	1428.88	405.673	1015.67	844.236	603.04	49.9227	11.4568	13.2203	10.4422
17	28806622	28841684	35062	-	ENSMUSG00000004865	protein_coding	ENSMUSG00000004865	Srpk1	ensembl_havana	17	ensembl_havana | havana	2049.24	1835.79	1831.86	2641.86	2295.2	2103.45	2198.67	735.957	1338.6	1420.28	1247.01	4274.26	4888.51	4694.09	4355.08
1	181642900	181670612	27712	-	ENSMUSG00000004880	protein_coding	ENSMUSG00000004880	Lbr	ensembl_havana	12	ensembl_havana | havana	12066.2	7904.55	11045.4	14572.4	12249.3	14023.8	15987.4	6060.4	12561.5	13373.5	12571.6	6506.16	8511.33	7385.48	6573.27
3	87766210	87792916	26706	-	ENSMUSG00000004895	protein_coding	ENSMUSG00000004895	Prcc	ensembl_havana	10	ensembl_havana	890.778	660.542	991.131	809.832	913.147	798.228	823.227	324.898	553.394	541.605	568.932	1642.91	1220.59	973.018	1053.35
3	87829908	87838025	8117	-	ENSMUSG00000004896	protein_coding	ENSMUSG00000004896	Rrnad1	ensembl_havana	17	ensembl_havana | havana	411.346	477.477	504.543	432.452	411.182	522.865	403.251	167.363	276.345	236.055	293.567	537.492	553.073	547.942	451.653
3	87813628	87823440	9812	+	ENSMUSG00000004897	protein_coding	ENSMUSG00000004897	Hdgf	ensembl_havana	17	ensembl_havana | havana	3872.41	2307.61	5284.31	4246.46	3789.56	3249.01	3958.39	2099.28	3637.94	4077.19	3799.7	14194.7	12012.1	9291.29	10386.1
6	120750539	120771298	20759	+	ENSMUSG00000004902	protein_coding	ENSMUSG00000004902	Slc25a18	ensembl_havana	8	ensembl_havana	24.7438	17.1569	33.7982	23.5965	44.4234	29.1245	36.8989	11.6676	14.7393	19.8276	23.1939	19.9691	13.2194	13.2203	32.6318
10	80905869	80918394	12525	+	ENSMUSG00000004929	protein_coding	ENSMUSG00000004929	Thop1	ensembl_havana	13	ensembl_havana | havana	286.803	221.815	299.959	418.13	402.278	216.816	395.709	119.369	251.908	317.241	245.582	1726.43	1632.16	1229.49	1268.07
10	81102794	81109081	6287	+	ENSMUSG00000004931	protein_coding	ENSMUSG00000004931	Apba3	ensembl_havana	12	ensembl | havana	407.149	540.445	323.617	497.415	536.783	462.757	716.348	130.139	226.449	237.931	197.83	336.752	454.749	396.612	324.359
10	81088769	81099200	10431	+	ENSMUSG00000004933	protein_coding	ENSMUSG00000004933	Matk	ensembl_havana	18	ensembl_havana | havana	749.063	1014.71	1149.14	860.799	566.399	635.346	606.923	174.117	214.39	203.493	212.838	1583	879.533	845.221	724.426
10	80989100	81003758	14658	-	ENSMUSG00000004934	protein_coding	ENSMUSG00000004934	Pias4	ensembl_havana	15	ensembl_havana | havana	489.253	486.521	563.585	449.277	459.041	434.711	582.748	215.402	399.301	307.849	323.35	532.812	460.036	413.356	390.929
9	64093052	64160914	67862	-	ENSMUSG00000004936	protein_coding	ENSMUSG00000004936	Map2k1	ensembl_havana	9	ensembl_havana | havana	2676.84	2843.15	2250.12	2860.83	2390.22	2812.13	3367.99	664.155	1676.26	1237.66	1221.09	1030.22	1149.21	914.849	943.061
10	80879909	80896016	16107	-	ENSMUSG00000004937	protein_coding	ENSMUSG00000004937	Sgta	ensembl_havana	7	ensembl_havana | havana	1042.61	768.389	1102.66	928.758	1226.58	901.783	1092.97	327.59	549.374	513.429	530.73	1229.92	1036.4	852.27	964.594
17	5461145	5490535	29390	-	ENSMUSG00000004945	protein_coding	ENSMUSG00000004945	Tmem242	ensembl_havana	16	ensembl_havana | havana	438.641	415.443	553.445	496.47	460.276	395.878	447.876	141.806	273.347	208.711	189.644	619.042	519.963	412.475	432.045
5	136023654	136061727	38073	+	ENSMUSG00000004947	protein_coding	ENSMUSG00000004947	Dtx2	ensembl_havana	16	ensembl_havana | havana	762.559	500.003	728.352	659.757	577.503	1019.36	609.468	130.139	213.05	219.146	271.505	314.059	415.09	328.746	285.202
5	136112770	136140715	27945	+	ENSMUSG00000004952	protein_coding	ENSMUSG00000004952	Rasa4	ensembl_havana	14	ensembl_havana | havana	3176.22	2262.27	3175.32	2798.56	1189.56	3042.97	1809.31	210.017	392.602	328.72	368.373	2561.48	1568.71	1348.48	1287
6	51437912	51446875	8963	-	ENSMUSG00000004980	protein_coding	ENSMUSG00000004980	Hnrnpa2b1	ensembl_havana	17	ensembl | ensembl_havana | havana	9031.44	8594.35	10762.2	12433.5	8739.1	10975.5	9873.59	4012.79	7664.45	8721.78	8187.41	18803.6	19315	14990.9	10240.4
8	84984424	84997010	12586	-	ENSMUSG00000004994	protein_coding	ENSMUSG00000004994	Ccdc130	ensembl_havana	13	ensembl_havana | havana	233.942	189.952	151.247	230.302	206.075	185.534	216.304	82.5708	113.895	137.749	113.241	251.429	136.601	178.915	161.854
8	84976535	84983956	7421	-	ENSMUSG00000004996	protein_coding	ENSMUSG00000004996	Mri1	ensembl_havana	10	ensembl_havana | havana	366.658	412.992	441.911	393.589	271.476	309.583	367.717	104.111	171.512	188.884	132.341	841.426	808.148	772.068	653.941
3	146435329	146518746	83417	-	ENSMUSG00000005034	protein_coding	ENSMUSG00000005034	Prkacb	ensembl_havana	16	ensembl_havana | havana	2176.32	2604.18	2158.04	3211.05	1670.81	2424.89	2257.18	788.015	1658.84	1387.92	1418.92	2664.97	3299.54	2987.78	2609.85
11	119234251	119246363	12112	-	ENSMUSG00000005043	protein_coding	ENSMUSG00000005043	Sgsh	ensembl_havana	14	ensembl_havana | havana	953.761	1354.97	962.332	1237.6	591.933	824.116	1178.69	195.477	345.238	305.221	272.556	472.675	276.726	355.186	342.633
4	152423108	152474652	51544	+	ENSMUSG00000005045	protein_coding	ENSMUSG00000005045	Chd5	ensembl_havana	17	ensembl | havana	12.3719	15.9314	22.8138	28.3158	25.9136	40.9901	8.90663	11.6676	13.3994	11.4791	25.9225	68.9841	30.8453	34.3729	20.8843
10	78261503	78263457	1954	+	ENSMUSG00000005054	protein_coding	ENSMUSG00000005054	Cstb	ensembl_havana	8	ensembl_havana	639.965	492.649	523.871	559.709	749.027	518.848	726.527	100.521	277.367	233.756	248.311	187.891	296.115	221.22	205.58
5	136247001	136275411	28410	-	ENSMUSG00000005057	protein_coding	ENSMUSG00000005057	Sh2b2	ensembl_havana	14	ensembl_havana | havana	646.712	547.798	719.058	715.45	476.318	783.127	867.763	155.269	278.707	247.323	261.954	716.162	624.841	567.593	552.783
6	124373775	124392027	18252	-	ENSMUSG00000005069	protein_coding	ENSMUSG00000005069	Pex5	ensembl_havana	13	ensembl | ensembl_havana | havana	1107.85	1125	1787.93	1229.85	962.507	1282.55	1464.5	260.277	696.767	664.745	638.513	1843.51	1504.37	1315.86	1205.42
12	72132363	72148236	15873	+	ENSMUSG00000005078	protein_coding	ENSMUSG00000005078	Jkamp	ensembl_havana	17	ensembl_havana | havana	355.411	390.933	245.037	413.411	286.284	364.596	377.895	101.418	292.106	197.232	199.194	132.522	326.079	267.051	263.665
2	102641486	102732011	90525	-	ENSMUSG00000005087	protein_coding	ENSMUSG00000005087	Cd44	ensembl_havana	18	ensembl | ensembl_havana | havana	9304.78	10367.5	7444.75	9794.55	9883.18	10679.8	15447.9	3370.99	7861.53	7073.31	7074.11	4065.53	4117.39	4110.6	4325.1
2	118219099	118305716	86617	+	ENSMUSG00000005102	protein_coding	ENSMUSG00000005102	Eif2ak4	ensembl_havana	14	ensembl | ensembl_havana | havana	471.258	617.649	408.957	554.99	403.512	539.343	489.865	181.297	309.525	267.15	282.419	997.55	1034.64	1000.35	936.53
5	38684156	38720565	36409	-	ENSMUSG00000005103	protein_coding	ENSMUSG00000005103	Wdr1	ensembl_havana	13	ensembl_havana | havana	13366.5	12992.5	10952	12935.1	12212.8	12205.9	15587.8	5324.9	10467.6	9202.94	7865.38	7051.87	6307.58	5377.19	5226.87
5	38506616	38660487	153871	-	ENSMUSG00000005107	protein_coding	ENSMUSG00000005107	Slc2a9	ensembl_havana	14	ensembl | ensembl_havana | havana	277.806	281.864	386.144	312.417	280.114	261.042	321.911	76.2882	155.433	107.486	133.706	201.506	208.867	159.525	136.401
15	66801167	66841490	40323	-	ENSMUSG00000005125	protein_coding	ENSMUSG00000005125	Ndrg1	ensembl_havana	14	ensembl_havana | havana	2471.02	1520.82	2230.66	2687.17	1531.35	2503.62	3001.52	592.343	1070.61	885.979	819.971	1286.19	979.985	1444.54	1211.94
8	85809899	85824912	15013	+	ENSMUSG00000005142	protein_coding	ENSMUSG00000005142	Man2b1	ensembl_havana	11	ensembl_havana | havana	9494.9	13597	8728.29	10978.9	8635.44	11853.6	11429.8	2984.22	6053.82	5161.43	5158.57	4992.28	4609.19	4654.47	3725.91
14	99536127	99552473	16346	+	ENSMUSG00000005148	protein_coding	ENSMUSG00000005148	Klf5	ensembl_havana	9	ensembl_havana | havana	236.191	319.855	397.974	272.776	613.29	368.911	709.987	262.073	584.212	486.297	618.048	137.968	77.5539	111.051	131.832
8	85801664	85807936	6272	-	ENSMUSG00000005150	protein_coding	ENSMUSG00000005150	Wdr83	ensembl_havana	17	ensembl_havana | havana	320.207	256.053	387.112	336.585	333.966	302.425	356.158	123.265	214.342	246.742	235.878	602.071	515.268	455.54	436.83
8	85696216	85701464	5248	+	ENSMUSG00000005161	protein_coding	ENSMUSG00000005161	Prdx2	ensembl_havana	16	ensembl | ensembl_havana | havana	2411.32	1786.04	2305.85	1667.96	1771.09	1425.71	1780.27	4660.66	7691.01	8052.03	7934.59	5197.51	4904.09	3939.93	4975.68
11	69624823	69649464	24641	-	ENSMUSG00000005198	protein_coding	ENSMUSG00000005198	Polr2a	ensembl_havana	16	ensembl | havana	4759.83	3416.7	4362.59	2807	2786.39	3106.58	4535.92	814.042	1272.94	1412.96	2274.36	7027.62	1290.23	3279.54	5066.57
11	69563941	69572911	8970	-	ENSMUSG00000005204	protein_coding	ENSMUSG00000005204	Senp3	ensembl_havana	13	ensembl_havana | havana	858.16	1042.82	923.507	1150.43	1022.79	1163.82	1224.03	365.286	829.33	811.732	712.187	1442.24	1796.91	1475.2	1362.67
6	54572096	54622825	50729	+	ENSMUSG00000005225	protein_coding	ENSMUSG00000005225	Plekha8	ensembl_havana	16	ensembl_havana	77.6056	125.691	38.0229	152.263	90.0807	75.508	101.79	55.4839	80.3962	69.9182	96.4916	164.062	244.4	214.611	306.75
2	69024239	69036539	12300	-	ENSMUSG00000005233	protein_coding	ENSMUSG00000005233	Spc25	ensembl_havana	17	ensembl | havana	758.063	412.992	782.425	817.383	697.201	612.693	829.587	424.521	860.24	861.975	806.328	607.241	663.613	530.575	671.561
11	69311635	69439937	128302	-	ENSMUSG00000005237	protein_coding	ENSMUSG00000005237	Dnah2	ensembl_havana	15	ensembl | havana	111.347	145.834	74.3559	91.5544	28.3816	143.465	78.8873	16.1551	32.1585	19.8276	19.1008	7.26148	0.881295	1.76271	1.30527
16	18630529	18654012	23483	+	ENSMUSG00000005262	protein_coding	ENSMUSG00000005262	Ufd1	ensembl_havana	14	ensembl | havana	781.678	789.221	765.531	771.133	657.712	743.217	793.963	280.023	507.836	500.907	466.606	616.317	757.913	716.541	667.647
11	62591182	62622732	31550	-	ENSMUSG00000005267	protein_coding	ENSMUSG00000005267	Zfp287	ensembl_havana	14	ensembl | havana	127.093	136.03	67.5963	82.1158	124.632	72.272	54.7122	46.6704	32.1585	34.4373	42.2947	40.8458	40.5396	46.7119	66.5688
5	33897017	33940162	43145	-	ENSMUSG00000005299	protein_coding	ENSMUSG00000005299	Letm1	ensembl_havana	7	ensembl_havana | havana	989.755	807.602	920.155	872.129	852.681	841.374	1113.33	367.081	608.332	581.26	525.273	1695.56	1418.89	1093.76	1204.77
13	58323970	58363468	39498	-	ENSMUSG00000005312	protein_coding	ENSMUSG00000005312	Ubqln1	ensembl_havana	16	ensembl_havana | havana	2288.78	1952.22	1765.1	2588.11	2201.43	2328.88	2411.15	894.815	1660.18	1621.69	1802.31	2199.3	3241.45	2663.44	3003.5
1	173160825	173195262	34437	-	ENSMUSG00000005338	protein_coding	ENSMUSG00000005338	Cadm3	ensembl_havana	15	ensembl_havana | havana	194.271	365.198	83.6504	139.691	76.5069	180.141	86.5216	104.496	140.693	133.691	192.373	29.9536	2.64388	17.6271	27.4027
1	173048851	173054782	5931	-	ENSMUSG00000005339	protein_coding	ENSMUSG00000005339	Fcer1a	ensembl_havana	11	ensembl_havana | havana	34.8663	6.12748	27.0385	147.242	53.0612	11.8656	30.537	78.0832	294.786	205.58	186.915	470.181	555.214	1351.12	764.242
15	77799247	77813207	13960	-	ENSMUSG00000005354	protein_coding	ENSMUSG00000005354	Txn2	ensembl_havana	17	ensembl_havana | havana	1274.31	873.777	1520.91	857.969	990.886	698.99	1106.97	411.957	507.835	574.999	532.095	1849.84	1605.72	1007.39	1549.99
15	8663608	8740249	76641	-	ENSMUSG00000005360	protein_coding	ENSMUSG00000005360	Slc1a3	ensembl_havana	15	ensembl_havana | havana	25.8685	26.9609	26.1936	8.49474	29.6156	4.31475	10.179	17.9502	45.5578	35.4809	21.8295	8.16917	9.69424	4.40678	6.52636
6	106757162	106777039	19877	-	ENSMUSG00000005362	protein_coding	ENSMUSG00000005362	Crbn	ensembl_havana	15	ensembl_havana | havana	864.974	1107.85	674.84	863.203	754.47	868.34	839.178	282.218	633.856	506.641	543.5	455.75	740.011	704.836	676.625
6	106687318	106725999	38681	-	ENSMUSG00000005364	protein_coding	ENSMUSG00000005364	Il5ra	ensembl_havana	12	ensembl | havana	16.8708	37.9904	7.60459	2.83158	7.4039	10.7869	12.7238	109.496	195.631	227.495	214.202	39.9382	26.4388	79.3221	114.864
17	88282490	88298321	15831	+	ENSMUSG00000005370	protein_coding	ENSMUSG00000005370	Msh6	ensembl_havana	5	ensembl_havana | havana	1936.77	1275.74	2243.35	2226.57	1428.95	1881.23	1353.81	878.661	1279.64	1301.3	1377.98	4256.14	4810.1	4056.88	4701.59
17	88298287	88372720	74433	-	ENSMUSG00000005371	protein_coding	ENSMUSG00000005371	Fbxo11	ensembl_havana	16	ensembl_havana | havana	1213.57	1169.12	1048.59	953.298	1046.42	1177.93	1229.12	435.292	762.423	662.657	900.469	710.719	601.043	714.778	781.859
5	135178511	135194615	16104	+	ENSMUSG00000005374	protein_coding	ENSMUSG00000005374	Tbl2	ensembl_havana	14	ensembl_havana | havana	693.951	417.894	697.087	688.074	671.286	642.897	652.729	203.734	365.803	401.769	395.66	1302.53	1115.72	1053.22	1288.3
5	135081811	135093814	12003	-	ENSMUSG00000005378	protein_coding	ENSMUSG00000005378	Bud23	ensembl_havana	18	ensembl_havana | havana	526.985	436.075	415.907	556.31	526.379	459.667	587.871	194.248	345.706	372.573	343.272	863.095	1058.19	751.805	860.767
8	75836197	75855068	18871	+	ENSMUSG00000005410	protein_coding	ENSMUSG00000005410	Mcm5	ensembl_havana	7	ensembl_havana | havana	4384.18	2384.83	4168.18	5741.43	3922.87	4224.16	4789.17	2070.55	3589.7	4129.31	3771.04	8695.49	10038	7705.1	7468.34
8	75820249	75827218	6969	+	ENSMUSG00000005413	protein_coding	ENSMUSG00000005413	Hmox1	ensembl_havana	9	ensembl_havana | havana	683.83	933.826	573.723	493.638	888.468	1080.84	1090.43	469.397	1043.81	1107.21	1045.09	58.9995	56.4029	44.9492	147.496
11	59552131	59671687	119556	+	ENSMUSG00000005417	protein_coding	ENSMUSG00000005417	Mprip	ensembl_havana	18	ensembl | ensembl_havana | havana	2420.91	2481.6	2350.47	3279.11	1967.23	2846.2	2429.24	783.481	1445.89	1534.06	1583.15	4903.22	3877.73	3652.56	3526.51
7	24967129	24993585	26456	+	ENSMUSG00000005442	protein_coding	ENSMUSG00000005442	Cic	ensembl_havana	14	ensembl | ensembl_havana | havana	4664.15	3865.19	4815.42	3513.07	3083.73	4774.3	4847.74	984.57	1519.49	1715.59	2161.11	4959.58	1908.88	2623.8	2990.4
7	24994474	24997412	2938	-	ENSMUSG00000005447	protein_coding	ENSMUSG00000005447	Pafah1b3	ensembl_havana	13	ensembl_havana | havana	487.002	399.512	440.221	420.961	193.735	335.471	237.934	175.912	310.865	334.981	362.915	368.52	390.414	277.627	212.107
8	84756923	84769219	12296	-	ENSMUSG00000005465	protein_coding	ENSMUSG00000005465	Il27ra	ensembl_havana	10	ensembl_havana | havana	211.447	365.198	113.224	94.386	275.178	88.4523	90.3387	68.2106	91.1157	91.8329	76.4033	208.768	237.068	259.119	214.065
8	84699622	84723073	23451	+	ENSMUSG00000005469	protein_coding	ENSMUSG00000005469	Prkaca	ensembl_havana	11	ensembl_havana | havana	594.978	669.122	488.384	692.794	496.062	518.849	776.151	246.815	487.737	499.864	437.955	843.238	1076.06	748.274	892.802
8	84682136	84696827	14691	+	ENSMUSG00000005470	protein_coding	ENSMUSG00000005470	Asf1b	ensembl_havana	9	ensembl_havana | havana	1232.69	696.082	930.295	1409.18	1333.93	1065.74	1617.19	640.821	1510.11	1379.58	1225.18	915.856	997.625	937.763	927.395
8	84441806	84453522	11716	+	ENSMUSG00000005481	protein_coding	ENSMUSG00000005481	Ddx39a	ensembl_havana	19	ensembl | ensembl_havana | havana	1686.78	1855.7	1829.73	2044.07	1941.89	1936.8	2172.24	707.359	1407.39	1529.11	1411.43	2786.81	3782.9	2902.55	2699.56
8	84334822	84339283	4461	+	ENSMUSG00000005483	protein_coding	ENSMUSG00000005483	Dnajb1	ensembl_havana	11	ensembl_havana | havana	1206.82	1033.09	1194.76	1392.2	1245.08	2175.68	1411.06	616.589	1558.34	1371.22	2252.55	1624.75	2709.94	1914.34	1652.51
1	87872841	87936274	63433	-	ENSMUSG00000005501	protein_coding	ENSMUSG00000005501	Usp40	ensembl_havana	15	ensembl_havana | havana	656.836	563.728	523.872	642.768	398.576	659.077	521.674	140.909	178.212	200.363	264.683	397.566	516.439	616.069	545.603
2	90735084	90741971	6887	+	ENSMUSG00000005505	protein_coding	ENSMUSG00000005505	Kbtbd4	ensembl_havana	13	ensembl_havana | havana	351.944	410.89	389.4	426.664	378.643	426.62	414.781	156.623	379.993	294.077	278.112	459.128	682.758	497.498	466.324
2	90770727	90849843	79116	+	ENSMUSG00000005506	protein_coding	ENSMUSG00000005506	Celf1	ensembl_havana	17	ensembl | ensembl_havana | havana	2022.24	1955.9	2392.07	2398.34	1658.47	2835.87	2378.08	971.103	2078.25	2255.12	2850.12	3335.77	3724.4	3439.9	3610.4
2	90724978	90735172	10194	-	ENSMUSG00000005510	protein_coding	ENSMUSG00000005510	Ndufs3	ensembl_havana	10	ensembl_havana | havana	659.876	665.416	803.89	705.666	669.639	617.367	673.976	173.085	319.24	393.426	343.081	655.715	1020.11	849.136	728.775
5	135698887	135764181	65294	+	ENSMUSG00000005514	protein_coding	ENSMUSG00000005514	Por	ensembl_havana	15	ensembl_havana | havana	1571.23	1136.03	1613.85	1567.75	2100.24	1443.29	2189.77	901.095	1301.08	1179.22	1049.18	1747.3	1494.67	1314.1	1159.08
7	67602575	67883417	280842	+	ENSMUSG00000005533	protein_coding	ENSMUSG00000005533	Igf1r	ensembl_havana	11	ensembl_havana | havana	1847.92	2122.56	2381.92	2265.27	3382.35	2362.33	3974.93	1399.21	2383.74	2196.68	2990.65	5745.62	2799.87	4113.29	4753.17
8	3172061	3329618	157557	-	ENSMUSG00000005534	protein_coding	ENSMUSG00000005534	Insr	ensembl_havana	11	ensembl_havana | havana	1864.78	1844.37	1918.05	2097.26	1827.53	2530.59	2436.61	688.388	1212.64	1179.22	1521.24	1625.67	1402.14	1391.67	1540.88
8	3731737	3744176	12439	-	ENSMUSG00000005540	protein_coding	ENSMUSG00000005540	Fcer2a	ensembl_havana	11	ensembl_havana | havana	26.9933	90.6867	43.9376	15.1018	16.0418	29.1245	6.36188	96.0334	123.274	161.751	192.373	17.246	12.3381	12.339	16.3159
7	30411634	30424960	13326	+	ENSMUSG00000005553	protein_coding	ENSMUSG00000005553	Atp4a	ensembl_havana	15	ensembl_havana | havana	32.6169	12.255	45.6275	22.6526	3.70195	31.2819	7.63426	2.69252	8.03962	12.5227	4.09303	55.3688	74.9101	72.2712	62.6531
7	12733041	12764963	31922	+	ENSMUSG00000005566	protein_coding	ENSMUSG00000005566	Trim28	ensembl_havana	15	ensembl_havana | havana	4809.3	3563.76	5447.54	6577.81	4485.53	5323.28	4950.82	1545.51	2922.4	3335.22	3193.95	10253.9	13452.7	10835.5	9603.67
7	12769047	12772203	3156	-	ENSMUSG00000005575	protein_coding	ENSMUSG00000005575	Ube2m	ensembl_havana	17	ensembl | ensembl_havana | havana	1139.34	1134.81	1373.05	1343.11	1419.08	1084.08	1515.4	661.464	970.114	1045.64	856.808	1501.31	1877.15	1524.75	1495.18
16	4105393	4238363	132970	-	ENSMUSG00000005580	protein_coding	ENSMUSG00000005580	Adcy9	ensembl_havana	12	ensembl | havana	212.572	196.079	190.115	230.302	202.373	217.895	225.211	121.164	203.67	164.882	178.729	324.951	277.608	346.373	305.434
13	83652153	83815200	163047	+	ENSMUSG00000005583	protein_coding	ENSMUSG00000005583	Mef2c	ensembl_havana	17	ensembl_havana | havana	2355.16	2640.94	2222.23	2868.39	902.041	2505.78	1374.17	663.259	1219.34	1143.74	1324.78	1848.05	3360.36	3301.55	2339.71
7	110628158	110655585	27427	+	ENSMUSG00000005609	protein_coding	ENSMUSG00000005609	Ctr9	ensembl_havana	17	ensembl_havana | havana	1547.62	1204.67	1473.61	1922.63	1240.14	1491.82	1291.46	572.61	814.682	856.763	804.964	2458.93	2486.11	2195.45	2244.44
7	110666957	110682238	15281	-	ENSMUSG00000005610	protein_coding	ENSMUSG00000005610	Eif4g2	ensembl_havana	18	ensembl_havana | havana	13716.2	11573.2	15131.6	14598	12836.3	14468.2	18339.1	4070.58	10527.5	9794.8	11847.6	18681.9	18324.7	17501.7	18621.7
7	110467473	110581669	114196	-	ENSMUSG00000005611	protein_coding	ENSMUSG00000005611	Irag1	ensembl_havana	16	ensembl_havana | havana	57.3607	154.413	109.844	139.691	27.1476	65.7999	31.8094	72.6981	100.495	97.0507	124.155	68.0764	133.075	111.932	69.8321
16	32249739	32293889	44150	+	ENSMUSG00000005615	protein_coding	ENSMUSG00000005615	Pcyt1a	ensembl_havana	16	ensembl_havana | havana	2568.62	2123.73	2478.28	3497.09	2114.11	2432.39	3043.07	1265.81	2586.75	2670.96	2404.31	3168.97	2621.33	2460.4	2868.13
7	80643429	80694913	51484	+	ENSMUSG00000005621	protein_coding	ENSMUSG00000005621	Zfp592	ensembl_havana	12	ensembl_havana | havana	2081.85	1626.23	1697.51	1855.63	1665.87	2345.06	2047.25	649.796	1297.06	1152.08	1571.73	2424.43	1966.17	2043.87	2140.65
3	94940005	94949926	9921	-	ENSMUSG00000005625	protein_coding	ENSMUSG00000005625	Psmd4	ensembl_havana	16	ensembl_havana | havana	2275.31	2049.03	2305.03	2015.14	2010.15	1855.34	2258.48	947.766	1574.42	1537.16	1428.47	2583.26	2611.25	2172.54	2064.3
12	54793134	54842489	49355	-	ENSMUSG00000005656	protein_coding	ENSMUSG00000005656	Snx6	ensembl_havana	10	ensembl_havana | havana	1016.74	756.131	762.145	1268.55	1232.75	883.446	1552.3	387.724	858.9	761.792	628.963	646.274	985.289	759.73	848.425
6	83282673	83302891	20218	-	ENSMUSG00000005667	protein_coding	ENSMUSG00000005667	Mthfd2	ensembl_havana	9	ensembl_havana | havana	900.902	799.021	651.46	685.243	1289.51	824.118	839.768	304.256	604.313	624.047	618.048	574.564	763.202	575.528	601.079
5	75735576	75817383	81807	+	ENSMUSG00000005672	protein_coding	ENSMUSG00000005672	Kit	ensembl_havana	13	ensembl_havana | havana	546.613	1730.39	1155.05	1521.52	730.518	758.314	959.375	403.878	848.18	881.805	862.266	5130.2	6176.33	6667.39	6317.07
1	171043580	171050084	6504	-	ENSMUSG00000005674	protein_coding	ENSMUSG00000005674	Tomm40l	ensembl_havana	10	ensembl_havana | havana	366.883	368.667	396.281	412.084	324.45	300.605	411.024	115.454	196.839	222.501	136.249	632.595	626.322	496.655	502.042
1	171041539	171048271	6732	+	ENSMUSG00000005677	protein_coding	ENSMUSG00000005677	Nr1i3	ensembl_havana	15	ensembl_havana | havana	7.64814	29.6194	32.1102	31.5299	21.0654	20.8439	30.49	9.29918	22.9109	20.6471	31.5652	27.2912	50.5131	41.8527	18.1086
10	128139204	128157228	18024	+	ENSMUSG00000005682	protein_coding	ENSMUSG00000005682	Pan2	ensembl_havana	10	ensembl_havana | havana	1120.22	753.68	1177.02	984.446	808.256	1027.99	955.553	372.466	535.975	578.13	664.437	1359.71	766.726	882.236	950.237
10	128173603	128198349	24746	+	ENSMUSG00000005683	protein_coding	ENSMUSG00000005683	Cs	ensembl_havana	9	ensembl_havana | havana	4983.63	3916.68	4417.42	4478.61	4518.81	4119.5	4814.67	1384.84	2693.27	2616.19	2665.93	5755.62	5760.14	4558.37	5114.71
7	110367413	110411613	44200	+	ENSMUSG00000005686	protein_coding	ENSMUSG00000005686	Ampd3	ensembl_havana	18	ensembl_havana | havana	1236.18	1192.22	1076.04	1186.55	1566.13	1805	2224.32	600.542	1388.18	1363.03	1421.04	602.269	412.128	450.374	674.569
3	103078971	103086483	7512	+	ENSMUSG00000005687	protein_coding	ENSMUSG00000005687	Bcas2	ensembl_havana	15	ensembl_havana | havana	767.057	816.179	709.761	894.78	693.498	718.406	796.509	384.133	625.75	732.577	656.25	1002.08	1502.62	1331.73	1162.35
8	106363200	106409555	46355	+	ENSMUSG00000005698	protein_coding	ENSMUSG00000005698	Ctcf	ensembl_havana	16	ensembl_havana | havana	3740.39	2760.08	2903.6	3913.76	2987.91	3265.99	3364.5	1846.5	2723.8	3142.36	3135.58	4938.96	4358.94	3954.03	4260.59
8	106427780	106430129	2349	+	ENSMUSG00000005699	protein_coding	ENSMUSG00000005699	Pard6a	ensembl_havana	17	ensembl | ensembl_havana | havana	77.6056	122.55	165.611	124.589	120.93	129.442	113.241	23.3352	77.7163	60.5262	87.3181	126.168	175.378	133.966	104.422
16	4362525	4377719	15194	-	ENSMUSG00000005718	protein_coding	ENSMUSG00000005718	Tfap4	ensembl_havana	9	ensembl_havana | havana	272.182	231.619	360.795	360.554	244.329	213.58	250.658	78.9807	138.013	165.925	125.52	1023.87	737.645	648.679	637.624
16	18057648	18066597	8949	-	ENSMUSG00000005732	protein_coding	ENSMUSG00000005732	Ranbp1	ensembl_havana	15	ensembl_havana | havana	2004.24	1025.73	1851.3	1830.15	2017.55	1215.67	1627.35	800.577	1074.63	1172.95	942.746	4368.69	4109.63	2954.33	3562.64
1	165616250	165704847	88597	+	ENSMUSG00000005763	protein_coding	ENSMUSG00000005763	Cd247	ensembl_havana	16	ensembl | ensembl_havana | havana	302.654	499.189	120.889	49.506	762.246	62.218	97.7606	65.14	54.9374	74.5967	78.5723	32.9782	31.8653	14.9312	33.3302
3	94861386	94868873	7487	+	ENSMUSG00000005774	protein_coding	ENSMUSG00000005774	Rfx5	ensembl_havana	13	ensembl | havana	602.851	776.1	400.258	627.357	532.042	457.502	453.35	203.048	241.662	299.982	277.95	895.763	682.4	803.662	793.965
3	94791404	94794273	2869	-	ENSMUSG00000005779	protein_coding	ENSMUSG00000005779	Psmb4	ensembl_havana	13	ensembl_havana | havana	2911.92	2591.94	3091.74	2744.72	2440.79	2732.33	3675.91	559.146	1689.66	1568.47	1350.71	2203.86	3526.98	2562.12	2266.59
9	7558457	7568487	10030	+	ENSMUSG00000005800	protein_coding	ENSMUSG00000005800	Mmp8	ensembl_havana	4	ensembl_havana	10870.4	6399.54	5484.6	13585	38463.2	12809.4	31255.9	12320.1	24752.6	18863.3	16185.2	353.09	63.4532	225.627	110.295
2	122523153	122544584	21431	-	ENSMUSG00000005802	protein_coding	ENSMUSG00000005802	Slc30a4	ensembl_havana	13	ensembl_havana | havana	585.977	612.749	479.09	545.552	728.048	662.315	377.896	143.601	203.67	225.408	234.667	130.707	229.137	229.153	186.001
2	122607157	122651490	44333	+	ENSMUSG00000005803	protein_coding	ENSMUSG00000005803	Sqor	ensembl_havana	15	ensembl_havana | havana	1917.63	1705.9	1460.08	2054.79	2775.25	2030.1	3561.3	1106.63	2529.81	1884.65	1555.34	609.964	446.818	411.594	576.932
2	122580423	122591396	10973	+	ENSMUSG00000005804	protein_coding	ENSMUSG00000005804	Bloc1s6	ensembl_havana	15	ensembl_havana | havana	594.978	622.551	456.274	706.007	518.273	585.728	698.533	229.762	505.155	435.162	334.265	353.089	602.806	607.254	492.09
3	138164717	138195277	30560	-	ENSMUSG00000005813	protein_coding	ENSMUSG00000005813	Metap1	ensembl_havana	13	ensembl_havana | havana	773.809	900.74	789.187	975.007	872.426	975.132	832.133	387.723	584.213	665.788	612.591	991.195	1399.5	1299.12	1225.65
17	57541635	57555447	13812	-	ENSMUSG00000005823	protein_coding	ENSMUSG00000005823	Gpr108	ensembl_havana	10	ensembl_havana | havana	1254.07	1149.52	1009.72	1167.55	1159.94	1254.52	1509.04	294.383	621.73	628.221	477.52	629.934	734.115	575.525	558.653
17	57496492	57501178	4686	-	ENSMUSG00000005824	protein_coding	ENSMUSG00000005824	Tnfsf14	ensembl_havana	8	ensembl_havana	531.992	404.414	302.493	483.256	1015.57	481.094	935.196	317.718	588.232	457.077	478.885	164.291	231.781	192.136	184.696
16	11010834	11021196	10362	-	ENSMUSG00000005846	protein_coding	ENSMUSG00000005846	Rsl1d1	ensembl_havana	13	ensembl_havana | havana	1445.26	1205.89	1369.66	1781.06	1610.35	1257.75	1315.64	487.347	837.461	1025.81	803.599	3634.38	4357.13	3615.27	3682.25
18	34353977	34455606	101629	+	ENSMUSG00000005871	protein_coding	ENSMUSG00000005871	Apc	ensembl_havana	16	ensembl | ensembl_havana | havana	2354.03	1941.18	1846.22	2205.81	1820.12	2794.88	1906.02	668.643	1146.99	1208.44	1495.32	2269.22	1672.69	1766.24	1974.87
18	34477938	34507124	29186	-	ENSMUSG00000005873	protein_coding	ENSMUSG00000005873	Reep5	ensembl_havana	7	ensembl_havana | havana	2268.56	2180.16	2268.71	2370.98	1398.1	2421.65	2598.19	567.226	1433.73	1258.53	1161.06	1127.35	1326.35	976.543	1089.9
2	155849965	155860200	10235	+	ENSMUSG00000005881	protein_coding	ENSMUSG00000005881	Ergic3	ensembl_havana	14	ensembl_havana | havana	1079.73	1118.88	1149.14	1235.51	935.361	1047.4	1299.09	278.228	651.21	630.308	506.172	1230.82	1457.67	1017.09	945.016
2	155688814	155772231	83417	-	ENSMUSG00000005882	protein_coding	ENSMUSG00000005882	Uqcc1	ensembl_havana	19	ensembl_havana | havana	525.244	512.257	577.948	599.35	491.125	537.186	543.304	173.219	276.027	327.676	285.148	913.131	1006.44	880.473	829.502
2	172819493	172835370	15877	+	ENSMUSG00000005883	protein_coding	ENSMUSG00000005883	Spo11	ensembl_havana	16	ensembl_havana | havana	31.4921	40.4414	8.44954	10.3825	54.2952	7.55081	8.90663	14.3601	9.37955	5.21778	16.3721	8.16917	5.28777	16.7458	11.7474
1	13209329	13444308	234979	-	ENSMUSG00000005886	protein_coding	ENSMUSG00000005886	Ncoa2	ensembl_havana	15	ensembl | ensembl_havana | havana	2267.42	2503.68	1820.04	2363.42	1932.42	2596.4	2586.74	790.705	1551.64	1369.15	1829.58	2626.84	1961.76	2342.66	2398.45
6	92068371	92151276	82905	+	ENSMUSG00000005893	protein_coding	ENSMUSG00000005893	Nr2c2	ensembl_havana	15	ensembl_havana | havana	2838.26	2796.98	3308.88	3485.28	2211.27	3308.94	3222.94	1002.4	2171.4	1894.02	2506.8	2851.76	2848.25	3043.04	2757.48
10	93983885	94033074	49189	+	ENSMUSG00000005897	protein_coding	ENSMUSG00000005897	Nr2c1	ensembl_havana	15	ensembl_havana | havana	182.204	145.834	105.619	204.818	124.632	201.714	236.662	59.2356	77.7163	74.0924	76.4033	150.676	237.068	212.407	225.812
16	17437218	17462693	25475	+	ENSMUSG00000005899	protein_coding	ENSMUSG00000005899	Smpd4	ensembl_havana	15	ensembl_havana | havana	846.913	598.042	871.149	947.635	720.646	838.139	779.967	440.676	668.627	731.533	787.226	1722.79	1981.16	1725.7	1850.87
5	3646066	3687233	41167	+	ENSMUSG00000005907	protein_coding	ENSMUSG00000005907	Pex1	ensembl_havana	15	ensembl_havana | havana	252.762	297.7	364.297	337.632	248.801	294.662	348.728	124.581	185.011	188.848	186.708	369.617	370.612	426.729	469.479
17	29170924	29188524	17600	+	ENSMUSG00000005936	protein_coding	ENSMUSG00000005936	Kctd20	ensembl_havana	20	ensembl_havana | havana	7207.08	5199.83	6267.01	7803.9	7638.27	7642.63	9258.1	2585.68	5726.84	4878.6	4762.96	3782.37	3899.75	3472.57	3688.77
11	72981409	73038273	56864	+	ENSMUSG00000005947	protein_coding	ENSMUSG00000005947	Itgae	ensembl_havana	12	ensembl_havana	58.4854	1700.99	92.9449	110.432	64.1671	215.737	61.074	13.4626	6.69968	14.6098	24.5582	9.98454	31.7266	14.1017	23.4949
11	73074422	73089869	15447	-	ENSMUSG00000005949	protein_coding	ENSMUSG00000005949	Ctns	ensembl_havana	10	ensembl_havana | havana	493.751	600.495	548.376	549.326	387.471	675.257	662.907	113.086	217.07	242.105	219.66	267.768	282.014	245.017	282.591
11	73090286	73115338	25052	+	ENSMUSG00000005951	protein_coding	ENSMUSG00000005951	Shpk	ensembl_havana	14	ensembl_havana | havana	125.969	127.451	120.829	107.6	75.2729	118.656	75.0702	23.3352	64.3169	59.4827	69.5816	80.7841	133.957	109.288	88.7585
3	94520064	94566180	46116	-	ENSMUSG00000005968	protein_coding	ENSMUSG00000005968	Tuft1	ensembl_havana	15	ensembl_havana | havana	56.2359	56.3728	70.1312	56.6316	53.0612	63.6425	48.3503	27.8228	52.2575	39.6551	39.566	125.261	113.687	139.254	101.811
2	105216636	105229665	13029	-	ENSMUSG00000005973	protein_coding	ENSMUSG00000005973	Rcn1	ensembl_havana	7	ensembl_havana | havana	381.279	387.256	358.261	574.808	594.779	351.652	330.818	170.527	328.284	363.157	293.335	893.17	1038.17	912.198	852.994
16	3854806	3857889	3083	+	ENSMUSG00000005980	protein_coding	ENSMUSG00000005980	Dnase1	ensembl_havana	16	ensembl_havana | havana	48.9176	78.4317	61.5934	56.6746	18.0503	64.378	54.7122	19.7452	27.4934	24.0018	49.7887	106.199	124.754	137.72	126.752
16	3857835	3895692	37857	-	ENSMUSG00000005981	protein_coding	ENSMUSG00000005981	Trap1	ensembl_havana	12	ensembl_havana | havana	1257.44	992.651	1056.19	1438.44	1412.91	1083	1250.75	375.158	730.265	810.843	757.211	3127.88	3644.15	2881.15	2955.14
16	3690239	3722635	32396	+	ENSMUSG00000005982	protein_coding	ENSMUSG00000005982	Naa60	ensembl_havana	15	ensembl_havana | havana	1953.91	1853.55	1773.88	1884.98	1909.7	1952.77	2771.85	584.135	1267.28	1185.04	1061.19	968.938	1067.28	999.559	995.907
16	3713043	3726554	13511	-	ENSMUSG00000005983	protein_coding	ENSMUSG00000005983	1700037C18Rik	ensembl_havana	16	ensembl_havana | havana	125.08	127.415	101.249	131.345	86.1879	181.164	121.724	46.8138	61.1398	73.6621	92.1473	82.1789	69.1041	77.5508	61.8243
19	4320208	4333166	12958	-	ENSMUSG00000005986	protein_coding	ENSMUSG00000005986	Ankrd13d	ensembl_havana	17	ensembl_havana | havana	156.336	148.285	202.789	199.154	208.543	222.21	181.95	68.2106	131.314	123.139	133.706	98.0301	66.0971	61.6949	47.6424
1	150268589	150325687	57098	+	ENSMUSG00000006005	protein_coding	ENSMUSG00000006005	Tpr	ensembl_havana	19	ensembl_havana | havana	7402.7	6095.43	5636.21	7293.18	6764.07	6299.07	6487.15	2526.86	3937.77	4453.86	4756.02	11282.6	8139.6	7230.28	9072.35
1	150237056	150268832	31776	-	ENSMUSG00000006010	protein_coding	ENSMUSG00000006010	Odr4	ensembl_havana	15	ensembl | ensembl_havana | havana	667.192	621.447	502.362	818.295	616.377	628.079	677.483	241.045	341.983	418.464	312.435	564.579	802.199	693.886	714.544
1	150325163	150341917	16754	-	ENSMUSG00000006014	protein_coding	ENSMUSG00000006014	Prg4	ensembl_havana	17	ensembl | havana	13.5267	22.112	16.9142	22.7394	13.6023	14.2121	12.8856	32.3103	32.194	24.0538	17.8047	5.4468	13.2757	23.9643	17.0666
7	15931072	15955963	24891	-	ENSMUSG00000006019	protein_coding	ENSMUSG00000006019	Dhx34	ensembl_havana	16	ensembl | havana	570.233	523.287	500.211	633.328	489.891	621.324	732.886	183.989	304.166	341.242	240.125	649.902	554.334	531.458	433.35
7	15853820	15861442	7622	+	ENSMUSG00000006021	protein_coding	ENSMUSG00000006021	Kptn	ensembl_havana	6	ensembl_havana | havana	406.024	395.835	343.051	348.284	257.902	262.121	297.736	99.6234	182.231	122.096	145.985	443.859	304.047	271.458	257.791
7	15832383	15851901	19518	+	ENSMUSG00000006024	protein_coding	ENSMUSG00000006024	Napa	ensembl_havana	14	ensembl_havana | havana	1184.33	1486.53	1099.29	1383.7	1364.79	1337.57	1640.09	662.362	1310.46	1502.72	1300.22	1230.82	1572.24	1398.71	1354.22
18	36799734	36803869	4135	-	ENSMUSG00000006050	protein_coding	ENSMUSG00000006050	Sra1	ensembl_havana	13	ensembl_havana | havana	706.323	649.512	506.972	607.846	665.116	634.267	802.868	175.912	474.338	444.554	343.815	383.951	561.385	472.408	420.298
11	95959678	95966497	6819	-	ENSMUSG00000006057	protein_coding	ENSMUSG00000006057	Atp5g1	ensembl_havana	16	ensembl | ensembl_havana | havana	804.569	759.69	592.385	786.355	913.526	653	921.668	256.465	558.658	578.83	489.784	1163.26	2236.89	1602.92	1467.31
11	95925711	95938257	12546	+	ENSMUSG00000006058	protein_coding	ENSMUSG00000006058	Snf8	ensembl_havana	11	ensembl_havana | havana	1103.9	812.54	1048.03	742.368	882.744	705.013	1077.53	300.787	528.1	536.487	438.407	1365.82	755.827	614.043	775.389
7	29923556	29931698	8142	-	ENSMUSG00000006095	protein_coding	ENSMUSG00000006095	Tbcb	ensembl_havana	13	ensembl_havana | havana	810.754	787.12	664.733	774.156	782.924	579.923	953.159	210.358	574.775	407.863	421.93	638.831	743.859	539.051	525.479
11	75521814	75539698	17884	+	ENSMUSG00000006127	protein_coding	ENSMUSG00000006127	Inpp5k	ensembl_havana	10	ensembl_havana | havana	1619.59	1496.33	1667.95	1694.22	1442.52	1700.02	1708.81	496.321	924.558	833.797	952.312	816.919	871.6	838.174	723.771
16	17269851	17305299	35448	+	ENSMUSG00000006134	protein_coding	ENSMUSG00000006134	Crkl	ensembl_havana	5	ensembl_havana | havana	1509.37	1430.15	1645.97	1822.59	1584.43	2058.13	1974.73	620.178	1325.2	1318.01	1578.55	1594.8	2125.68	1705.42	1705.34
7	4463673	4483487	19814	+	ENSMUSG00000006154	protein_coding	ENSMUSG00000006154	Eps8l1	ensembl_havana	14	ensembl_havana | havana	372.282	259.805	130.968	28.3158	183.863	167.196	128.51	77.1857	54.9374	97.0507	87.3181	176.091	193.004	119.864	105.727
11	45742791	45801453	58662	+	ENSMUSG00000006169	protein_coding	ENSMUSG00000006169	Clint1	ensembl_havana	21	ensembl_havana | havana	4838.44	4499.97	4105.7	5674.24	4265.91	5000.83	5677.32	1707.98	3241.27	2938.7	2955.18	5136.55	5285.03	4353.94	4106.54
13	22186343	22193913	7570	-	ENSMUSG00000006179	protein_coding	ENSMUSG00000006179	Prss16	ensembl_havana	10	ensembl_havana | havana	204.699	166.667	263.626	192.547	366.493	176.905	339.724	46.6704	116.574	87.6587	100.962	112.553	104.874	93.4238	112.253
13	29375729	30039658	663929	-	ENSMUSG00000006191	protein_coding	ENSMUSG00000006191	Cdkal1	ensembl_havana	18	ensembl_havana | havana	392.527	426.472	309.253	399.252	323.304	382.934	346.087	132.831	195.631	278.629	218.295	413.905	542.878	449.492	462.065
4	141171965	141195242	23277	+	ENSMUSG00000006215	protein_coding	ENSMUSG00000006215	Zbtb17	ensembl_havana	13	ensembl_havana | havana	626.469	638.483	642.161	678.636	735.452	604.065	683.265	208.222	357.763	381.942	342.451	777.889	794.047	654.849	528.635
9	21870193	21874803	4610	-	ENSMUSG00000006235	protein_coding	ENSMUSG00000006235	Epor	ensembl_havana	7	ensembl_havana | havana	4.49888	11.0295	10.9844	8.49474	16.0418	2.15737	3.81713	244.122	495.776	612.567	678.079	637.195	746.456	639.865	622.614
5	88868714	88912080	43366	+	ENSMUSG00000006262	protein_coding	ENSMUSG00000006262	Mob1b	ensembl_havana	16	ensembl_havana | havana	776.056	806.375	845.797	941.028	693.498	969.739	967.008	334.771	723.567	599	851.35	757.009	1015.25	1152.82	1015.5
8	69541298	69566364	25066	+	ENSMUSG00000006273	protein_coding	ENSMUSG00000006273	Atp6v1b2	ensembl_havana	15	ensembl_havana | havana	4876.77	4022.1	4467.25	5090.19	4067.19	5101.04	7671.02	1017.77	2925.08	2514.97	2277.09	2134.88	2250.83	1989.22	1868.49
8	73094843	73175305	80462	-	ENSMUSG00000006276	protein_coding	ENSMUSG00000006276	Eps15l1	ensembl_havana	11	ensembl_havana | havana	1214.7	1170.35	968.317	1151.51	947.699	1342.96	1208.76	483.757	728.924	792.058	784.499	1511.3	1117.48	1169.56	1144.07
14	51061516	51108018	46502	-	ENSMUSG00000006281	protein_coding	ENSMUSG00000006281	Tep1	ensembl_havana	9	ensembl_havana | havana	3154.86	3186.11	2033.01	2939.61	1105.65	3390.36	2269.59	282.715	624.411	534.723	663.872	1235.91	788.372	825.834	789.691
14	51002872	51022977	20105	-	ENSMUSG00000006288	protein_coding	ENSMUSG00000006288	Ttc5	ensembl_havana	9	ensembl_havana | havana	750.127	977.459	680.096	938.387	539.558	797.149	813.664	193.666	450.513	402.939	390.012	671.548	775.994	733.368	616.315
14	51143935	51162351	18416	-	ENSMUSG00000006289	protein_coding	ENSMUSG00000006289	Osgep	ensembl_havana	15	ensembl_havana | havana	963.224	655.136	721.952	886.96	557.692	789.56	742.029	247.781	356.908	349.732	287.417	834.483	907.637	779.801	732.158
1	74318999	74323898	4899	-	ENSMUSG00000006299	protein_coding	ENSMUSG00000006299	Aamp	ensembl_havana	14	ensembl_havana | havana	1687.08	2052.7	2018.6	2144.45	1741.16	2070.01	2005.27	653.383	1242.12	1176.04	944.129	3316.7	2943.54	2412.3	1925.28
1	74327406	74344782	17376	-	ENSMUSG00000006301	protein_coding	ENSMUSG00000006301	Tmbim1	ensembl_havana	18	ensembl_havana | havana	472.181	616.779	565.485	524.535	375.038	523.162	404.567	138.944	281.387	231.26	201.921	369.418	659.21	661.014	592.604
1	74275243	74307369	32126	+	ENSMUSG00000006304	protein_coding	ENSMUSG00000006304	Arpc2	ensembl_havana	15	ensembl_havana | havana	10477.7	9715.37	9166.36	9723.08	9957.58	9504.35	12741.1	3548.3	6747.39	5645.68	5035.03	4774.39	4565.92	3672.26	4084.13
7	30268283	30288152	19869	-	ENSMUSG00000006307	protein_coding	ENSMUSG00000006307	Kmt2b	ensembl_havana	17	ensembl_havana | havana	1869.29	1833.33	2102.24	1299.7	1441.3	1936.25	1942.93	525.045	848.182	956.942	1286.58	3938.37	1295.49	1776.82	2271.16
7	30289106	30298335	9229	-	ENSMUSG00000006310	protein_coding	ENSMUSG00000006310	Zbtb32	ensembl_havana	11	ensembl_havana | havana	53.9865	183.824	18.589	32.0912	13.5738	62.5638	22.9028	3.59003	9.37955	9.392	17.7365	13.6153	3.52518	14.1017	7.83163
7	30427126	30428966	1840	-	ENSMUSG00000006315	protein_coding	ENSMUSG00000006315	Tmem147	ensembl_havana	10	ensembl_havana | havana	534.241	643.385	593.159	728.66	694.733	638.582	833.406	132.831	344.364	340.199	237.396	745.209	1375.7	1153.7	891.499
7	3706992	3709897	2905	+	ENSMUSG00000006333	protein_coding	ENSMUSG00000006333	Rps9	ensembl_havana	15	ensembl_havana | havana	31655.2	22047.9	46416.2	21165.4	25458.6	22788.7	25747.9	5373.83	12258.2	10135.8	9127.72	36929.4	23147.2	17304.6	19007.7
7	3623323	3632929	9606	-	ENSMUSG00000006335	protein_coding	ENSMUSG00000006335	Tfpt	ensembl_havana	17	ensembl_havana | havana	398.15	240.197	396.283	256.73	285.05	238.39	281.195	98.7259	144.713	117.922	110.512	390.304	253.813	194.78	218.633
10	75425174	75453035	27861	+	ENSMUSG00000006344	protein_coding	ENSMUSG00000006344	Ggt5	ensembl_havana	18	ensembl_havana | havana	214.821	281.864	217.998	246.347	607.12	350.573	558.573	146.294	286.746	336.025	231.939	85.3224	90.7734	92.5425	71.79
10	75397438	75422035	24597	+	ENSMUSG00000006345	protein_coding	ENSMUSG00000006345	Ggt1	ensembl_havana	11	ensembl_havana | havana	21.3697	17.1569	23.6587	20.7649	186.331	69.0359	167.954	25.1302	58.9572	111.66	50.4808	9.07685	17.6259	3.52543	2.61054
12	113103856	113109127	5271	+	ENSMUSG00000006356	protein_coding	ENSMUSG00000006356	Crip2	ensembl_havana	11	ensembl_havana | havana	11.2472	88.2357	13.5193	16.9895	32.0835	17.259	16.5409	70.9031	132.654	172.187	120.062	151.583	180.665	132.203	159.896
12	113109936	113117500	7564	+	ENSMUSG00000006360	protein_coding	ENSMUSG00000006360	Crip1	ensembl_havana	12	ensembl | havana	9037.18	8306.39	9221.44	6607.98	3590.91	7383.68	6153.21	771.859	1744.6	1290.88	1232	1839.87	1279.64	1193.36	1102.31
8	123351880	123425849	73969	-	ENSMUSG00000006362	protein_coding	ENSMUSG00000006362	Cbfa2t3	ensembl_havana	17	ensembl_havana | havana	2424.64	2364.38	1605.81	1508.5	414.354	2107.57	1655.95	209.104	289.953	338.28	561.637	2872.55	1012.85	1358.74	1917.27
15	85090150	85170737	80587	+	ENSMUSG00000006369	protein_coding	ENSMUSG00000006369	Fbln1	ensembl_havana	15	ensembl_havana | havana	23.6191	12.255	60.8367	40.586	17.2758	18.3377	47.0779	7.18007	10.7195	13.5662	15.0078	13.6153	23.795	8.81356	16.9685
X	35861859	35869733	7874	+	ENSMUSG00000006373	protein_coding	ENSMUSG00000006373	Pgrmc1	ensembl_havana	11	ensembl_havana	830.043	908.092	962.402	1159.06	687.328	819.802	891.936	239.635	521.235	484.21	500.714	1120.08	1793.43	1428.68	1213.9
15	78915074	78922554	7480	+	ENSMUSG00000006378	protein_coding	ENSMUSG00000006378	Gcat	ensembl_havana	16	ensembl_havana | havana	214.008	97.2732	226.129	116.698	99.886	111.899	245.552	16.9221	50.5427	56.3504	24.6541	121.397	192.488	91.3299	97.7565
4	94627526	94763214	135688	+	ENSMUSG00000006386	protein_coding	ENSMUSG00000006386	Tek	ensembl_havana	16	ensembl_havana | havana	12.3719	4.90198	6.75963	2.83158	19.7437	3.23606	2.54475	6.28256	22.7789	21.9147	17.7365	49.015	185.072	133.085	145.538
4	118299612	118314711	15099	-	ENSMUSG00000006389	protein_coding	ENSMUSG00000006389	Mpl	ensembl_havana	14	ensembl_havana | havana	6.74831	4.90198	23.6587	16.0456	9.87186	6.47212	10.179	15.2576	44.2179	34.4373	38.2017	234.183	133.957	160.407	165.117
4	118285290	118290151	4861	+	ENSMUSG00000006390	protein_coding	ENSMUSG00000006390	Elovl1	ensembl_havana	16	ensembl | ensembl_havana | havana	972.883	1219.36	958.181	1116.58	1150.07	1130.46	1549.75	367.978	915.177	851.539	776.311	730.689	1113.08	1038.24	935.875
4	118266534	118272980	6446	+	ENSMUSG00000006392	protein_coding	ENSMUSG00000006392	Med8	ensembl_havana	17	ensembl | ensembl_havana | havana	873.906	917.896	673.428	885.342	1183.39	824.116	951.737	421.829	645.849	634.482	594.854	742.486	942.986	780	881.71
4	118217187	118219942	2755	+	ENSMUSG00000006395	polymorphic_pseudogene	ENSMUSG00000006395	Hyi	ensembl_havana	17	ensembl | havana	139.465	137.256	116.604	100.049	57.9972	99.2392	67.4359	34.1053	38.8582	34.4373	20.4652	227.829	174.496	167.458	152.717
4	118290098	118294550	4452	-	ENSMUSG00000006398	protein_coding	ENSMUSG00000006398	Cdc20	ensembl_havana	16	ensembl_havana | havana	1724.05	1095.59	2074.32	2206.72	2022.44	1536.05	2482.16	738.424	1583.78	1691.36	1384.71	2399.82	2549.61	1941.49	1835.18
1	171197667	171216167	18500	+	ENSMUSG00000006411	protein_coding	ENSMUSG00000006411	Nectin4	ensembl_havana	13	ensembl_havana | havana	318.296	227.942	251.796	275.607	103.655	281.537	169.226	52.0555	79.0562	76.1795	54.5738	49.9227	29.964	46.7119	28.0633
1	171173238	171186823	13585	+	ENSMUSG00000006412	protein_coding	ENSMUSG00000006412	Pfdn2	ensembl_havana	11	ensembl_havana | havana	310.937	245.477	419.896	293.445	257.495	260.352	343.296	91.9846	132.084	129.914	155.329	891.053	513.709	363.606	381.65
2	167334565	167358094	23529	+	ENSMUSG00000006418	protein_coding	ENSMUSG00000006418	Rnf114	ensembl_havana	18	ensembl_havana | havana	3180.79	2118.89	2452.08	2185.97	2462.99	3012.78	2476.02	677.715	1641.43	1203.21	1236.09	765.181	1281.41	962.438	948.933
X	36087390	36137765	50375	-	ENSMUSG00000006423	protein_coding	ENSMUSG00000006423	C330007P06Rik	ensembl_havana	16	ensembl | havana	1042.01	729.224	793.952	1099.82	775.864	753.055	866.991	400.184	768.29	726.759	683.507	713.542	1168.6	904.516	1034.3
4	148675960	148679451	3491	+	ENSMUSG00000006442	protein_coding	ENSMUSG00000006442	Srm	ensembl_havana	11	ensembl_havana | havana	364.409	343.139	335.447	728.661	637.97	410.979	660.365	195.657	317.565	473.775	319.257	1684.65	3025.53	2304.77	1839.13
4	141028551	141056696	28145	+	ENSMUSG00000006445	protein_coding	ENSMUSG00000006445	Epha2	ensembl_havana	4	ensembl_havana | havana	453.261	50.2453	623.575	336.958	96.2506	774.497	162.864	107.701	127.294	151.316	214.202	88.9532	135.719	82.8475	80.9268
19	4850597	4861663	11066	-	ENSMUSG00000006456	protein_coding	ENSMUSG00000006456	Rbm14	ensembl_havana	11	ensembl_havana | havana	1088.74	952.396	1238.58	1315.13	1003.74	1380.11	1371.07	397.675	839.811	900.828	1015.01	2015.01	2148.83	2018.19	1953.4
2	167533097	167571093	37996	+	ENSMUSG00000006462	lncRNA	ENSMUSG00000006462	A530013C23Rik	ensembl_havana	7	ensembl_havana | havana	51.7371	23.2844	62.5266	13.214	28.3816	36.6753	22.9028	36.7978	25.4588	21.9147	39.566	3.63074	2.64388	1.76271	3.91582
19	4928696	4935426	6730	+	ENSMUSG00000006463	protein_coding	ENSMUSG00000006463	Zdhhc24	ensembl_havana	14	ensembl_havana | havana	183.329	186.275	145.332	174.614	175.226	179.062	212.487	78.9807	184.911	170.099	189.644	216.029	245	249.424	231.685
19	4936906	4956657	19751	-	ENSMUSG00000006464	protein_coding	ENSMUSG00000006464	Bbs1	ensembl_havana	10	ensembl_havana | havana	10.1225	33.0884	28.7284	59.4632	11.1058	32.3606	36.8989	36.7978	44.2179	50.0907	69.5816	88.0455	87.2482	77.5594	61.3478
2	25134833	25146035	11202	-	ENSMUSG00000006471	protein_coding	ENSMUSG00000006471	Ndor1	ensembl_havana	19	ensembl_havana | havana	585.296	776.06	887.454	680.331	468.746	878.086	691.354	177.122	266.442	373.44	322.538	1083.19	1086.21	1032.62	905.861
2	24944367	24952894	8527	+	ENSMUSG00000006476	protein_coding	ENSMUSG00000006476	Nsmf	ensembl_havana	20	ensembl | ensembl_havana | havana	232.817	314.953	195.184	230.302	297.39	239.469	237.934	74.4932	107.195	134.619	135.07	301.352	248.525	324.339	242.781
2	71703568	71734203	30635	+	ENSMUSG00000006494	protein_coding	ENSMUSG00000006494	Pdk1	ensembl_havana	12	ensembl_havana | havana	785.053	803.925	863.543	1176.05	1137.73	659.077	739.25	370.671	600.291	650.136	444.776	1651.08	2145.97	1860.54	1963.13
10	79690261	79700606	10345	+	ENSMUSG00000006498	protein_coding	ENSMUSG00000006498	Ptbp1	ensembl_havana	17	ensembl_havana | havana	5235.46	4169.58	5419.34	5785.25	5418.75	5072.96	5935.5	1738.61	3196.87	3786.37	3469.72	8757.34	10329.1	8650.51	8489.52
8	123160340	123170162	9822	-	ENSMUSG00000006517	protein_coding	ENSMUSG00000006517	Mvd	ensembl_havana	6	ensembl_havana | havana	498.251	479.169	511.199	419.074	398.575	611.612	572.57	88.8532	241.189	168.012	171.907	122.538	141.888	110.17	107.032
8	123151515	123159670	8155	-	ENSMUSG00000006519	protein_coding	ENSMUSG00000006519	Cyba	ensembl_havana	12	ensembl_havana | havana	8670.04	8075.18	8001.01	6508.95	10727.9	6390.16	11121.1	2742.76	5939.69	4730.31	3882.96	1275.29	1385.39	1000.34	1035.09
14	30547547	30599168	51621	+	ENSMUSG00000006526	protein_coding	ENSMUSG00000006526	Stimate	ensembl_havana	14	ensembl_havana | havana	400.401	437.502	408.114	348.284	324.537	353.809	371.534	119.369	198.311	194.101	139.163	278.659	244.119	190.373	222.549
14	30436806	30544679	107873	+	ENSMUSG00000006527	protein_coding	ENSMUSG00000006527	Sfmbt1	ensembl_havana	17	ensembl_havana | havana	608.473	495.1	589.777	524.787	463.977	475.701	559.845	268.355	454.238	502.994	556.652	987.559	653.04	816.135	955.458
8	22482801	22550322	67521	-	ENSMUSG00000006567	protein_coding	ENSMUSG00000006567	Atp7b	ensembl_havana	12	ensembl_havana | havana	14.6213	2.45099	34.6431	6.60702	17.2758	3.23606	1.27238	101.418	219.75	283.847	268.776	1681.01	1081.34	1119.32	1698.8
11	102239650	102257030	17380	-	ENSMUSG00000006574	protein_coding	ENSMUSG00000006574	Slc4a1	ensembl_havana	16	ensembl_havana | havana	201.325	2113.98	866.078	227.47	256.668	431.475	13.9961	18166.4	31100	36285.7	42431.3	2919.12	265.27	483.865	817.1
11	102284229	102293382	9153	+	ENSMUSG00000006575	protein_coding	ENSMUSG00000006575	Rundc3a	ensembl_havana	15	ensembl_havana | havana	14.6213	22.0589	29.5734	16.9895	66.6351	24.8098	15.2685	34.1053	38.8582	40.6987	51.8451	37.2151	22.0324	27.3221	17.6212
8	123294754	123300294	5540	+	ENSMUSG00000006585	protein_coding	ENSMUSG00000006585	Cdt1	ensembl_havana	4	ensembl_havana | havana	1107.85	850.493	1444.87	1631.94	1082.21	1150.96	1418.71	456.831	1041.13	1041.48	1054.64	2847.45	2647.4	2342.65	2133.45
8	123301374	123303649	2275	-	ENSMUSG00000006589	protein_coding	ENSMUSG00000006589	Aprt	ensembl_havana	9	ensembl_havana | havana	1497.01	1104.17	1787.93	1184.54	1862.08	1246.96	2113.43	500.81	1132.25	1002.86	739.473	1346.09	1561.66	1178.37	1065.75
7	46445527	46473225	27698	+	ENSMUSG00000006599	protein_coding	ENSMUSG00000006599	Gtf2h1	ensembl_havana	14	ensembl_havana | havana	1042.61	895.837	846.64	1036.36	1215.47	1031.22	979.728	410.162	667.288	690.831	577.117	1315.23	1584.58	1143.12	1441
13	23886017	23894838	8821	-	ENSMUSG00000006611	protein_coding	ENSMUSG00000006611	Hfe	ensembl_havana	16	ensembl_havana | havana	558.986	1856.63	307.563	408.692	563.931	516.691	538.215	90.6483	194.291	171.143	133.706	200.598	169.209	129.559	167.727
5	31107410	31112436	5026	+	ENSMUSG00000006638	polymorphic_pseudogene	ENSMUSG00000006638	Abhd1	ensembl_havana	16	ensembl | havana	20.8926	43.764	17.3809	29.8191	11.1561	17.8357	32.3703	7.48492	10.7925	7.51026	15.7837	7.57675	11.224	12.3733	14.4865
5	31193380	31206269	12889	-	ENSMUSG00000006641	protein_coding	ENSMUSG00000006641	Slc5a6	ensembl_havana	13	ensembl_havana | havana	73.1067	49.3186	108.002	105.651	109.885	107.198	86.5475	23.3186	32.1592	52.1778	43.6684	213.162	307.027	265.289	201.853
7	30157740	30186649	28909	+	ENSMUSG00000006649	protein_coding	ENSMUSG00000006649	Nphs1	ensembl_havana	18	ensembl_havana | havana	3104.49	2516.32	4355.93	3127.44	3988.5	2345.48	2734.73	1002.21	1340.99	1113.37	1141.28	4056.4	4866.05	3306.53	4562.41
9	108394005	108437363	43358	+	ENSMUSG00000006673	protein_coding	ENSMUSG00000006673	Qrich1	ensembl_havana	15	ensembl_havana | havana	2107.93	2205.7	1740.73	2651.83	2526.82	2231.02	2473.05	1071.12	1716.56	1909.07	1820.37	3099.55	3458.21	3182.88	3224.08
9	108456061	108474867	18806	-	ENSMUSG00000006675	protein_coding	ENSMUSG00000006675	P4htm	ensembl_havana	11	ensembl_havana | havana	26.9933	33.0884	20.2789	19.8211	14.8078	15.1016	16.5409	9.87259	13.3994	9.392	16.3721	43.5689	58.1655	44.9492	43.7266
9	108367801	108379537	11736	+	ENSMUSG00000006676	protein_coding	ENSMUSG00000006676	Usp19	ensembl_havana	17	ensembl_havana | havana	2725.18	2496.33	2696.25	2817.42	2428.47	2930.79	2923.93	900.199	1638.74	1627.95	1828.22	3893.08	3222.87	2954.3	2850.07
X	92348373	92675762	327389	-	ENSMUSG00000006678	protein_coding	ENSMUSG00000006678	Pola1	ensembl_havana	7	ensembl_havana | havana	2009.87	909.318	1564.01	2495.57	1480.78	1755.02	1689.72	849.043	1477.95	1703.08	1575.82	3923.94	4141.2	3680.55	3905.36
4	137047007	137085032	38025	-	ENSMUSG00000006699	protein_coding	ENSMUSG00000006699	Cdc42	ensembl_havana	18	ensembl_havana | havana	14389.7	15353.7	11727.3	15836.1	13167.2	14790.4	18504.8	4451.4	11742.6	9720.4	8542.8	4634.68	9195.39	7549.68	6971.07
17	31783708	31826668	42960	+	ENSMUSG00000006705	protein_coding	ENSMUSG00000006705	Pknox1	ensembl_havana	14	ensembl_havana | havana	904.276	895.836	790.031	1145.84	836.559	1030.15	1123.51	473.884	937.955	804.583	963.227	796.899	1018.78	945.695	933.241
13	24935828	24945907	10079	-	ENSMUSG00000006715	protein_coding	ENSMUSG00000006715	Gmnn	ensembl_havana	12	ensembl_havana | havana	764.809	397.06	790.883	834.377	550.356	505.903	694.719	280.022	578.852	572.911	558.017	1018.42	1035.53	834.639	857.556
13	25001931	25015524	13593	-	ENSMUSG00000006717	protein_coding	ENSMUSG00000006717	Acot13	ensembl_havana	8	ensembl_havana | havana	188.953	188.726	158.851	159.512	215.947	111.105	136.144	68.2106	119.254	101.225	103.69	145.23	211.511	192.136	222.549
13	22129264	22144950	15686	+	ENSMUSG00000006720	protein_coding	ENSMUSG00000006720	Zfp184	ensembl_havana	17	ensembl | havana	42.7393	23.2844	48.1624	125.533	51.8273	31.2819	29.2646	32.3103	22.7789	30.2631	31.3799	128.891	194.766	193.898	145.538
10	126899403	126903790	4387	+	ENSMUSG00000006728	protein_coding	ENSMUSG00000006728	Cdk4	ensembl_havana	13	ensembl_havana | havana	3428.07	2136.54	3641.44	4367.4	3064.36	2981.06	3746.36	962.45	1908.95	2225.42	1759.68	6198.39	9395.02	6728.86	6551.71
10	127001094	127008200	7106	+	ENSMUSG00000006731	protein_coding	ENSMUSG00000006731	B4galnt1	ensembl_havana	11	ensembl_havana | havana	2724.2	4547.05	3572.14	3098.08	3027.52	2456.03	3413.52	923.327	1477.04	1423.07	1371.47	4822.82	3336.95	2777.32	2804.67
10	126877283	126882235	4952	+	ENSMUSG00000006732	protein_coding	ENSMUSG00000006732	Mettl1	ensembl_havana	15	ensembl_havana | havana	179.955	175.246	166.456	290.709	243.095	154.252	215.032	74.4932	87.0959	166.969	105.055	697.103	750.862	689.22	626.531
10	126903149	126906134	2985	-	ENSMUSG00000006736	protein_coding	ENSMUSG00000006736	Tspan31	ensembl_havana	10	ensembl_havana | havana	1233.9	956.619	1130.86	1058.84	863.382	903.277	1045.42	169.307	343.477	334.428	265.005	877.879	1028.16	710.592	843.31
18	6201002	6242175	41173	-	ENSMUSG00000006740	protein_coding	ENSMUSG00000006740	Kif5b	ensembl_havana	15	ensembl_havana | havana	4067.58	4342.57	3776.21	5549.69	4747.16	4777.43	5315.63	1917.98	3860.21	3660.71	3652.19	4197.41	4621.41	3893.77	3407.27
7	46335532	46360105	24573	-	ENSMUSG00000006763	protein_coding	ENSMUSG00000006763	Saal1	ensembl_havana	15	ensembl_havana | havana	473.506	398.286	446.136	494.582	382.535	439.026	463.145	140.011	241.188	253.584	210.109	589.996	645.108	534.102	511.666
11	100465730	100482556	16826	+	ENSMUSG00000006782	protein_coding	ENSMUSG00000006782	Cnp	ensembl_havana	17	ensembl_havana | havana	2134.4	2122.02	1586.94	1801.6	778.641	1747.83	1483.1	774.797	1424.55	1321.78	1427.14	1464.53	1563.24	1266.94	1406.21
11	100436433	100463395	26962	+	ENSMUSG00000006784	protein_coding	ENSMUSG00000006784	Odad4	ensembl_havana	15	ensembl_havana | havana	21.3697	4.90198	23.6587	5.66316	13.5738	11.8656	5.0895	23.3352	14.7393	22.9582	15.0078	13.6153	12.3381	12.339	22.8423
2	165915009	165997584	82575	-	ENSMUSG00000006800	protein_coding	ENSMUSG00000006800	Sulf2	ensembl_havana	15	ensembl_havana | havana	1586.5	2257.36	1111.39	1426.81	1046.76	1891.67	1710.29	253.272	471.849	438.58	386.231	268.752	69.6783	96.4116	109.056
17	13225733	13258951	33218	+	ENSMUSG00000006818	protein_coding	ENSMUSG00000006818	Sod2	ensembl_havana	6	ensembl_havana | havana	1206.15	1185.6	1223.77	1213.24	1273.65	1040.66	1223.5	400.164	840.121	832.411	709.462	1728.52	2210.86	1899.92	1907.42
18	36868092	36875451	7359	+	ENSMUSG00000006850	protein_coding	ENSMUSG00000006850	Tmco6	ensembl_havana	9	ensembl_havana | havana	438.641	397.061	413.182	388.87	278.88	373.226	449.148	159.756	272.007	238.974	240.125	361.259	373.669	342.847	293.686
6	83520193	83549712	29519	-	ENSMUSG00000006906	protein_coding	ENSMUSG00000006906	Stambp	ensembl_havana	11	ensembl_havana | havana	340.79	254.903	431.771	214.256	173.992	214.659	362.627	120.266	127.294	130.444	124.155	312.244	109.281	185.966	259.097
11	101081941	101117290	35349	-	ENSMUSG00000006920	protein_coding	ENSMUSG00000006920	Ezh1	ensembl_havana	15	ensembl | havana	1110.1	1280.64	905.789	1185.49	883.533	1184.4	1178.22	444.266	825.4	763.885	757.212	706.18	671.546	688.337	663.079
9	120758282	120789574	31292	+	ENSMUSG00000006932	protein_coding	ENSMUSG00000006932	Ctnnb1	ensembl_havana	18	ensembl_havana | havana	7144.03	5455.69	6229.7	8041.08	6278.35	7822.03	8080.34	2041.74	4289.04	4191.77	4381.94	5830.94	8659.48	7156.32	7013.23
9	120321298	120324397	3099	+	ENSMUSG00000006941	protein_coding	ENSMUSG00000006941	Eif1b	ensembl_havana	6	ensembl_havana | havana	798.551	580.885	731.731	734.324	797.152	715.169	795.235	296.178	517.215	442.467	504.807	628.117	910.375	605.492	834.068
16	20470402	20482165	11763	+	ENSMUSG00000006998	protein_coding	ENSMUSG00000006998	Psmd2	ensembl_havana	17	ensembl_havana | havana	3348.05	3105.38	3309.59	3282.2	3451.01	3007.44	3759.57	1131.26	2060.53	2323.49	2087.44	5486.84	5512.81	4245.41	4437.21
17	35219963	35235299	15336	+	ENSMUSG00000007029	protein_coding	ENSMUSG00000007029	Vars	ensembl_havana	17	ensembl_havana | havana	4106.34	3580.88	4489.21	4140.65	4188.14	3885.51	4215.42	1368.69	2196.16	2408.54	2484.46	8492.52	7076.77	5941.35	5517.37
17	35191679	35198262	6583	+	ENSMUSG00000007033	protein_coding	ENSMUSG00000007033	Hspa1l	ensembl_havana	5	ensembl_havana	18.8145	28.8579	8.77305	41.9786	15.803	37.6195	13.5088	2.39133	34.3937	16.5327	24.7957	26.1868	48.9949	59.3378	43.3163
17	35247581	35265722	18141	-	ENSMUSG00000007035	protein_coding	ENSMUSG00000007035	Msh5	ensembl_havana	16	ensembl_havana | havana	98.9753	53.9218	94.6349	66.0702	28.3816	97.0818	66.1635	47.5679	40.1981	82.4409	88.6824	68.0764	69.6223	55.5255	75.0531
17	35308239	35321964	13725	+	ENSMUSG00000007036	protein_coding	ENSMUSG00000007036	Abhd16a	ensembl_havana	16	ensembl_havana | havana	794.051	779.418	672.585	672.027	818.131	609.459	815.594	372.466	640.49	609.436	597.582	1122.81	1022.3	881.349	1016.81
17	35150229	35154930	4701	+	ENSMUSG00000007038	protein_coding	ENSMUSG00000007038	Neu1	ensembl_havana	6	ensembl_havana | havana	1423.9	1306.38	1546.27	1401.63	1996.58	1318.15	2107.07	671.336	1323.86	1169.83	1062.82	827.81	609.858	575.526	573.014
17	35278011	35281072	3061	+	ENSMUSG00000007039	protein_coding	ENSMUSG00000007039	Ddah2	ensembl_havana	13	ensembl_havana | havana	103.474	49.0198	180.82	82.1157	45.6574	89.5309	62.3464	43.0804	62.977	66.7876	65.4885	297.72	186.834	202.712	159.896
17	35268942	35277726	8784	+	ENSMUSG00000007041	protein_coding	ENSMUSG00000007041	Clic1	ensembl_havana	10	ensembl_havana | havana	6680.89	5460.75	5643.37	6284.32	6119.25	5341.66	7116.34	1791.41	3856.31	3398.87	2603.16	3354.77	4001.07	2879.36	2668.02
17	35200838	35204868	4030	+	ENSMUSG00000007050	protein_coding	ENSMUSG00000007050	Lsm2	ensembl_havana	18	ensembl_havana | havana	438.64	235.295	443.601	444.559	368.96	363.517	503.861	182.194	267.987	293.239	271.505	688.026	883.058	656.61	760.972
5	110434172	110485341	51169	+	ENSMUSG00000007080	protein_coding	ENSMUSG00000007080	Pole	ensembl_havana	15	ensembl_havana | havana	1774.81	759.805	1599.48	2444.58	1523.97	1419.55	1526.86	664.156	1025.05	1207.4	1247.01	3815.86	3676.74	3420.1	3567.93
5	135052336	135079955	27619	+	ENSMUSG00000007207	protein_coding	ENSMUSG00000007207	Stx1a	ensembl_havana	11	ensembl_havana | havana	22.4944	18.3824	11.8294	19.8211	11.1058	19.4164	13.9961	6.28256	1.33994	7.30489	4.09303	13.6153	13.2194	12.339	15.0106
6	48578997	48600162	21165	+	ENSMUSG00000007216	protein_coding	ENSMUSG00000007216	Zfp775	ensembl_havana	7	ensembl | havana	114.721	196.08	141.107	134.028	95.0167	145.623	117.059	43.0804	36.1783	49.0471	39.566	165.199	139.245	151.593	143.58
19	6103652	6107816	4164	-	ENSMUSG00000007338	protein_coding	ENSMUSG00000007338	Mrpl49	ensembl_havana	11	ensembl_havana | havana	663.582	465.688	637.098	599.352	663.882	490.802	515.313	301.564	557.413	506.123	559.381	904.965	1037.28	756.198	856.257
3	103009920	103077086	67166	+	ENSMUSG00000007379	protein_coding	ENSMUSG00000007379	Dennd2c	ensembl_havana	16	ensembl_havana | havana	163.084	142.158	134.348	177.446	57.9972	165.039	141.234	162.449	313.545	413.248	364.28	138.876	102.23	96.9492	110.295
12	111540957	111622656	81699	+	ENSMUSG00000007411	protein_coding	ENSMUSG00000007411	Mark3	ensembl_havana	17	ensembl_havana | havana	1483.51	1601.73	1304.61	1634.77	1382.06	1653.63	1554.85	738.649	1254.18	1414.01	1398.45	1161.84	1409.19	1239.19	1317.67
5	3682932	3707186	24254	-	ENSMUSG00000007415	protein_coding	ENSMUSG00000007415	Gatad1	ensembl_havana	16	ensembl_havana | havana	1144.58	821.082	916.78	1197.59	1056.57	1151.51	1220.83	474.955	966.424	932.812	754.646	467.991	1414.48	1137.94	1101.09
6	122285679	122294640	8961	+	ENSMUSG00000007458	protein_coding	ENSMUSG00000007458	M6pr	ensembl_havana	15	ensembl_havana | havana	6726.21	6329.04	5492.78	7600.65	6416.12	6046.23	7082.33	1721.39	3823.02	3540.11	3069.16	4585.72	8178.82	6436.74	6373.09
2	30127727	30153803	26076	+	ENSMUSG00000007476	protein_coding	ENSMUSG00000007476	Lrrc8a	ensembl_havana	19	ensembl_havana | havana	596.905	569.871	970.64	763.57	447.015	887.879	646.398	215.463	476.714	376.764	461.84	1019.42	631.597	580.412	564.447
18	68470667	68475518	4851	+	ENSMUSG00000007480	protein_coding	ENSMUSG00000007480	Mc5r	ensembl_havana	6	ensembl | havana	22.4944	6.12748	27.0385	70.7895	14.8078	37.754	17.8133	21.5402	33.4984	31.3067	31.3799	414.813	678.597	757.969	507.098
17	21165573	21186179	20606	+	ENSMUSG00000007564	protein_coding	ENSMUSG00000007564	Ppp2r1a	ensembl_havana	16	ensembl_havana | havana	2947.9	3096.82	3008.02	3345.04	3096.06	3046.23	4164.5	888.536	2021.97	1879.44	1729.99	3519.08	3565.7	3040.68	2690.82
17	28532493	28545547	13054	+	ENSMUSG00000007570	protein_coding	ENSMUSG00000007570	Fance	ensembl_havana	17	ensembl_havana | havana	248.563	220.589	389.524	329.407	288.752	149.937	202.308	78.0832	138.013	145.054	124.155	753.378	430.072	363.119	364.171
14	55912146	55919278	7132	-	ENSMUSG00000007589	protein_coding	ENSMUSG00000007589	Tinf2	ensembl_havana	10	ensembl_havana | havana	1034.93	1117.45	835.6	917.915	922.99	975.924	1029.29	380.755	689.857	654.289	736.49	794.006	850.623	750.117	876.856
17	57071757	57077094	5337	+	ENSMUSG00000007603	protein_coding	ENSMUSG00000007603	Dus3l	ensembl_havana	10	ensembl_havana | havana	751.312	734.072	771.44	795.675	656.477	763.711	641.278	171.424	261.288	327.677	267.412	1141.86	960.613	1010.03	790.344
8	71940747	71952228	11481	+	ENSMUSG00000007610	protein_coding	ENSMUSG00000007610	Gtpbp3	ensembl_havana	16	ensembl | ensembl_havana | havana	418.396	379.904	403.043	445.502	385.002	359.203	469.507	113.984	192.951	175.317	171.907	619.948	524.371	476.813	478.382
4	47353222	47414932	61710	+	ENSMUSG00000007613	protein_coding	ENSMUSG00000007613	Tgfbr1	ensembl_havana	16	ensembl_havana | havana	1422.77	1671.58	1229.41	1854.68	1119.23	2000.96	1730.44	608.51	1465.89	1188.61	1316.59	566.396	1273.47	1131.66	875.835
13	93436143	93541638	105495	+	ENSMUSG00000007617	protein_coding	ENSMUSG00000007617	Homer1	ensembl_havana	19	ensembl_havana | havana	407.148	321.08	254.331	341.677	318.368	458.442	433.88	141.806	237.169	279.673	236.032	187.891	300.522	255.593	307.391
11	87267471	87295781	28310	-	ENSMUSG00000007646	protein_coding	ENSMUSG00000007646	Rad51c	ensembl_havana	14	ensembl_havana | havana	85.4786	61.2748	70.1312	148.186	82.6769	102.475	75.0702	77.1857	144.713	83.4844	129.613	70.7995	81.9604	83.7289	87.4533
9	74944896	74967596	22700	+	ENSMUSG00000007656	protein_coding	ENSMUSG00000007656	Arpp19	ensembl_havana	14	ensembl | ensembl_havana | havana	1247.31	1126.23	1109.43	1388.42	1057.52	1142.33	1140.05	367.081	915.177	747.187	758.575	939.454	1435.63	1359.05	1185.84
2	152622588	152673649	51061	-	ENSMUSG00000007659	protein_coding	ENSMUSG00000007659	Bcl2l1	ensembl_havana	19	ensembl | ensembl_havana | havana	408.273	513.483	450.361	430.4	626.862	419.609	548.394	1706.16	2756.24	2919.87	3142.1	561.859	335.773	244.136	324.36
17	57328051	57338523	10472	-	ENSMUSG00000007670	protein_coding	ENSMUSG00000007670	Khsrp	ensembl_havana	11	ensembl_havana | havana	3339.27	2461.99	3601.1	2919.34	3020.75	2992.26	3687.34	1069.83	1705.74	1887.8	2212.97	8313.5	4759.81	4821.15	5609.6
12	90691326	90705213	13887	-	ENSMUSG00000007682	protein_coding	ENSMUSG00000007682	Dio2	ensembl_havana	8	ensembl_havana	66.3584	78.4317	166.456	331.295	350.451	43.1475	237.934	140.909	253.248	227.495	215.566	801.486	727.068	759.729	753.142
8	71320871	71326580	5709	-	ENSMUSG00000007721	protein_coding	ENSMUSG00000007721	Ccdc124	ensembl_havana	7	ensembl_havana | havana	592.727	501.228	527.251	524.786	681.158	586.805	698.534	253.995	439.499	353.765	323.35	748.84	729.712	490.916	490.782
11	22940519	22953781	13262	+	ENSMUSG00000007739	protein_coding	ENSMUSG00000007739	Cct4	ensembl_havana	11	ensembl_havana | havana	3799.3	3143.39	3309.66	3926.46	3061.51	3587.67	3904.96	996.232	2133.18	2027.63	2170.67	4626.36	7644.43	5868.91	6132.68
11	51576213	51579702	3489	-	ENSMUSG00000007777	protein_coding	ENSMUSG00000007777	0610009B22Rik	ensembl_havana	10	ensembl_havana | havana	155.211	96.8142	98.8596	201.042	141.908	144.544	176.86	50.2605	108.535	99.1378	113.241	49.015	198.291	189.492	174.254
7	44608796	44624276	15480	-	ENSMUSG00000007783	protein_coding	ENSMUSG00000007783	Cpt1c	ensembl_havana	11	ensembl_havana | havana	19.1202	19.6079	13.5193	11.3263	3.70195	12.9442	6.36188	21.5402	20.099	28.176	25.9225	57.1842	14.982	28.2034	53.5161
5	145168525	145184113	15588	+	ENSMUSG00000007812	protein_coding	ENSMUSG00000007812	Zfp655	ensembl_havana	17	ensembl_havana | havana	880.651	748.781	701.311	830.601	793.447	941.693	889.396	245.917	633.789	578.133	671.258	675.316	1076.93	1070.85	1115.35
9	108183328	108215134	31806	+	ENSMUSG00000007815	protein_coding	ENSMUSG00000007815	Rhoa	ensembl_havana	14	ensembl_havana | havana	10846	9827.76	10834.5	9142.21	8721.93	9117.81	12206.9	3262.98	6745.69	5982.98	5789.74	5624.14	5762.37	4861.61	5045.53
14	25459609	25667168	207559	+	ENSMUSG00000007817	protein_coding	ENSMUSG00000007817	Zmiz1	ensembl_havana	16	ensembl_havana | havana	3086.21	2898.53	3125.22	2536.87	1628.04	2960.7	2808.1	432.514	786.541	852.583	1256.56	4479.57	1054.61	2428.8	2802.51
6	118478269	118539188	60919	-	ENSMUSG00000007827	protein_coding	ENSMUSG00000007827	Ankrd26	ensembl_havana	11	ensembl_havana | havana	201.325	147.06	239.967	235.021	250.498	196.321	202.308	126.549	164.812	181.579	200.559	908.593	706.799	695.39	840.595
7	44790108	44804009	13901	-	ENSMUSG00000007833	protein_coding	ENSMUSG00000007833	Aldh16a1	ensembl_havana	16	ensembl_havana | havana	1639.21	1583.01	1737.99	1793.09	1396.06	1671.88	1985.48	434.364	955.487	811.517	797.353	2269.84	1805.95	1672.4	1229.16
13	58273693	58276371	2678	-	ENSMUSG00000007836	protein_coding	ENSMUSG00000007836	Hnrnpa0	ensembl_havana	7	ensembl_havana	2390.03	2464.47	3262.37	3051.5	1966.97	2046.27	2716.52	692.876	1459.19	1356.62	1462.58	4224.37	5182.01	3744	3130.04
7	44703008	44712102	9094	-	ENSMUSG00000007837	protein_coding	ENSMUSG00000007837	Prrg2	ensembl_havana	12	ensembl | havana	130.468	131.128	170.681	117.039	138.206	129.442	194.674	55.6455	93.7956	105.399	87.3181	99.8454	94.2985	70.5085	57.432
11	50267817	50277356	9539	+	ENSMUSG00000007850	protein_coding	ENSMUSG00000007850	Hnrnph1	ensembl_havana	17	ensembl | havana	5474.04	5804.92	5488.82	8072.64	4596.59	6746.88	4852.71	2448.4	3866.99	4316.02	4421.41	8328.97	11515.8	11372.7	8926.85
4	135870808	135873067	2259	+	ENSMUSG00000007872	protein_coding	ENSMUSG00000007872	Id3	ensembl_havana	4	ensembl_havana | havana	41.6146	137.256	45.6275	21.7088	41.9554	60.4065	25.4475	36.7978	76.3764	62.6133	75.039	29.0459	11.4568	7.93221	14.358
4	133406319	133484081	77762	-	ENSMUSG00000007880	protein_coding	ENSMUSG00000007880	Arid1a	ensembl_havana	17	ensembl | havana	5744.97	4096.78	4953.93	4093.52	3771.01	5468.96	5585.65	1144.33	2106.36	1957.71	3352.23	8021.18	3008.8	4999.03	6489.85
7	141929648	141941776	12128	-	ENSMUSG00000007891	protein_coding	ENSMUSG00000007891	Ctsd	ensembl_havana	17	ensembl_havana | havana	7041.27	5431.34	5990.05	7263.68	11976	7511.16	13395.3	4596.65	9290.75	8168.2	7257.02	5038.53	5878.41	4848.23	4798.17
9	61820566	61821825	1259	-	ENSMUSG00000007892	protein_coding	ENSMUSG00000007892	Rplp1	ensembl_havana	9	ensembl_havana	17866.5	12882.2	27060.5	11623.3	18530.1	10448.5	11942.9	4046.66	6768.52	5443.93	5942.95	21500.9	20619.3	15016.6	19403.5
8	71909349	71916300	6951	-	ENSMUSG00000007950	protein_coding	ENSMUSG00000007950	Abhd8	ensembl_havana	10	ensembl_havana | havana	250.812	316.178	305.029	278.438	371.429	236.232	288.829	118.471	179.551	150.272	165.086	338.567	368.381	332.271	282.591
5	136937004	136944259	7255	+	ENSMUSG00000007987	protein_coding	ENSMUSG00000007987	Ift22	ensembl_havana	13	ensembl_havana | havana	218.196	225.491	172.371	199.154	155.482	174.747	253.203	64.6206	88.4358	134.619	109.148	245.983	292.59	218.576	192.528
14	65429898	65499913	70015	-	ENSMUSG00000007989	protein_coding	ENSMUSG00000007989	Fzd3	ensembl_havana	8	ensembl_havana | havana	20.2449	11.0295	34.6431	21.7088	40.7214	17.259	21.6304	53.8505	34.8383	28.176	39.566	80.784	72.2662	90.7797	102.464
X	10581252	10585930	4678	+	ENSMUSG00000008035	protein_coding	ENSMUSG00000008035	Mid1ip1	ensembl_havana	13	ensembl_havana | havana	1132.6	1314.95	1278.41	1496.96	1691.8	1402.3	2033.25	686.593	1244.8	1190.7	1049.18	1196.32	908.616	912.2	746.622
7	16472335	16483220	10885	+	ENSMUSG00000008036	protein_coding	ENSMUSG00000008036	Ap2s1	ensembl_havana	12	ensembl_havana | havana	1804.05	1689.96	1758.32	1725.38	1717.71	1729.12	2608.39	606.714	1377.45	1057.12	1064.19	1494.06	1705.31	1276.21	1106.88
5	108840248	108854791	14543	+	ENSMUSG00000008090	protein_coding	ENSMUSG00000008090	Fgfrl1	ensembl_havana	15	ensembl_havana | havana	33.7416	37.9904	35.4881	36.8105	14.8078	31.2819	20.358	104.111	150.073	190.971	203.287	231.46	267.032	226.508	229.074
8	84874654	84899220	24566	+	ENSMUSG00000008129	protein_coding	ENSMUSG00000008129	Brme1	ensembl_havana	15	ensembl_havana | havana	13.4966	19.6079	19.4339	14.1579	16.0418	5.39343	21.6304	8.97508	12.0594	9.392	12.2791	37.2151	19.3885	37.017	18.2738
1	43162234	43236145	73911	-	ENSMUSG00000008136	protein_coding	ENSMUSG00000008136	Fhl2	ensembl_havana	15	ensembl_havana | havana	12.3719	13.4805	27.0385	8.49474	1.23398	3.23606	13.9961	18.8477	24.1189	7.30489	5.45738	10.8922	6.16906	26.4407	20.2317
7	44139361	44145954	6593	-	ENSMUSG00000008140	protein_coding	ENSMUSG00000008140	Emc10	ensembl_havana	19	ensembl | havana	1268.69	1118.88	1567.4	1242.12	1055.06	1029.07	1380.52	340.155	649.869	615.698	529.366	1551.24	1633.05	1179.25	1050.75
6	124407540	124441754	34214	-	ENSMUSG00000008153	protein_coding	ENSMUSG00000008153	Clstn3	ensembl_havana	13	ensembl_havana | havana	15.7461	4.90198	22.8138	23.5965	32.0835	19.4164	30.537	36.7978	62.977	57.3956	49.1164	400.289	334.891	379.864	395.498
8	85786684	85793754	7070	+	ENSMUSG00000008167	protein_coding	ENSMUSG00000008167	Fbxw9	ensembl_havana	15	ensembl_havana | havana	101.225	91.9122	112.3	100.707	77.7409	95.565	90.3387	35.9003	42.878	31.3067	34.1086	184.26	152.698	128.678	134.729
7	44175417	44181496	6079	-	ENSMUSG00000008193	protein_coding	ENSMUSG00000008193	Spib	ensembl_havana	14	ensembl_havana | havana	1419.39	1236.53	1068.87	828.71	175.226	1312.76	421.156	947.767	1543.61	1504.81	1941.46	29.0459	25.5575	28.2034	78.9689
2	90575714	90611366	35652	+	ENSMUSG00000008200	protein_coding	ENSMUSG00000008200	Fnbp4	ensembl_havana	16	ensembl | havana	2099.84	1953.44	2245.04	2315.29	1852.21	2446.46	1623.55	796.09	1033.09	1260.61	1405.28	2237.46	2658.86	2369.1	2359.27
8	4543026	4581681	38655	+	ENSMUSG00000008206	protein_coding	ENSMUSG00000008206	Cers4	ensembl_havana	17	ensembl_havana | havana	168.708	230.393	175.75	287.877	117.228	147.78	108.151	109.496	111.215	120.009	121.427	241.444	257.338	276.746	234.949
2	73142945	73168163	25218	+	ENSMUSG00000008226	protein_coding	ENSMUSG00000008226	Scrn3	ensembl_havana	15	ensembl_havana | havana	121.47	154.412	108.154	193.491	148.078	122.97	181.95	313.23	554.734	615.698	552.56	299.536	438.004	399.255	535.161
18	56695515	56720785	25270	+	ENSMUSG00000008301	protein_coding	ENSMUSG00000008301	Phax	ensembl_havana	12	ensembl_havana | havana	769.309	556.376	701.315	799.445	710.696	683.888	615.694	242.327	314.885	360.027	276.962	898.554	895.391	683.55	811.632
4	72035379	72119157	83778	-	ENSMUSG00000008305	protein_coding	ENSMUSG00000008305	Tle1	ensembl_havana	19	ensembl | ensembl_havana | havana	522.995	524.512	338.827	466.267	222.117	598.671	375.274	129.151	215.73	156.529	209.756	298.629	364.856	314.644	302.17
5	3621566	3634357	12791	+	ENSMUSG00000008307	protein_coding	ENSMUSG00000008307	1700109H08Rik	ensembl_havana	12	ensembl_havana | havana	74.2315	72.3043	102.239	63.2386	43.1894	87.3736	53.4398	26.0277	68.3367	61.5698	54.5738	156.122	103.74	165.695	139.011
7	100495054	100512654	17600	-	ENSMUSG00000008318	protein_coding	ENSMUSG00000008318	Relt	ensembl_havana	11	ensembl_havana | havana	1647.71	1892.16	1825.94	1571.52	1236.44	2568.39	2056.16	402.083	901.775	995.536	826.794	456.566	521.726	438.916	376.57
2	142904959	142914774	9815	+	ENSMUSG00000008333	protein_coding	ENSMUSG00000008333	Snrpb2	ensembl_havana	13	ensembl_havana | havana	1238.31	844.366	1059.57	1165.67	995.828	1080.84	1007.72	365.286	715.525	586.478	560.745	790.598	1452.37	978.302	1146.03
5	125463029	125467267	4238	-	ENSMUSG00000008348	protein_coding	ENSMUSG00000008348	Ubc	ensembl_havana	10	ensembl_havana | havana	6268.03	7275.98	3817.26	8654.88	8484.74	7908.83	8283.53	3091.83	5766.98	6307.45	5680.27	7436.48	7310.59	6776.71	5607.61
7	3632984	3645486	12502	+	ENSMUSG00000008373	protein_coding	ENSMUSG00000008373	Prpf31	ensembl_havana	17	ensembl | ensembl_havana | havana	1338.08	981.697	1141.67	1342.19	1567.26	1041.48	1246.3	505.846	639.132	857.654	602.006	3049.71	2578.42	2013.86	2114.86
7	27186335	27189742	3407	+	ENSMUSG00000008384	protein_coding	ENSMUSG00000008384	Sertad1	ensembl_havana	9	ensembl_havana | havana	400.4	291.668	614.281	343.565	613.289	488.645	570.024	186.682	522.575	412.204	392.931	261.413	244.119	164.814	126.611
16	8476444	8490020	13576	-	ENSMUSG00000008393	protein_coding	ENSMUSG00000008393	Carhsp1	ensembl_havana	10	ensembl_havana	980.49	1041.5	961.608	1067.99	1842.69	1288.29	2371.74	1530.71	3726.39	3593.08	3502.17	796.527	541.591	572.145	724.968
10	93083276	93146998	63722	-	ENSMUSG00000008398	protein_coding	ENSMUSG00000008398	Elk3	ensembl_havana	17	ensembl_havana | havana	679.518	1073.67	626.854	1081.44	550.538	985.049	775.211	220.435	391.464	350.459	379.894	899.871	1067.01	1030.92	815.508
9	25019428	25063117	43689	-	ENSMUSG00000008429	protein_coding	ENSMUSG00000008429	Herpud2	ensembl_havana	9	ensembl_havana | havana	786.179	982.848	855.938	923.094	981.016	1095.95	1215.12	416.444	774.483	654.309	809.057	511.935	713.849	740.34	633.058
7	4427769	4448649	20880	-	ENSMUSG00000008435	protein_coding	ENSMUSG00000008435	Rdh13	ensembl_havana	16	ensembl_havana | havana	201.325	231.619	407.268	228.414	245.563	239.468	231.572	58.338	139.353	131.488	98.2328	496.504	594.874	502.373	437.265
8	106587212	106605963	18751	+	ENSMUSG00000008450	protein_coding	ENSMUSG00000008450	Nutf2	ensembl_havana	9	ensembl_havana | havana	65.4621	28.1847	16.2043	27.1382	16.735	23.2162	12.2448	15.3889	21.0887	16.7856	25.7797	26.3735	73.5773	40.894	35.894
1	152642293	152651349	9056	+	ENSMUSG00000008475	protein_coding	ENSMUSG00000008475	Arpc5	ensembl_havana	14	ensembl_havana | havana	8993.27	9250.87	6800.97	10463.9	8658.26	9450.38	13511.9	3651.81	8888.77	7086.06	6344.29	2661.31	3764.78	3108.5	2991.61
7	24786769	24879152	92383	-	ENSMUSG00000008496	protein_coding	ENSMUSG00000008496	Pou2f2	ensembl_havana	20	ensembl_havana | havana	953.763	1052.7	987.75	572.922	539.25	719.485	731.615	172.322	234.489	284.891	271.505	728.868	200.054	291.729	472.506
6	138117314	138133754	16440	+	ENSMUSG00000008540	protein_coding	ENSMUSG00000008540	Mgst1	ensembl_havana	12	ensembl_havana | havana	4270.55	2708.36	3190.53	3798.15	5525.64	3710.67	6220.56	1428.83	3526.73	2421.03	2107.91	461.104	354.281	237.085	304.781
4	82208410	82623988	415578	-	ENSMUSG00000008575	protein_coding	ENSMUSG00000008575	Nfib	ensembl_havana	18	ensembl | havana	13.4966	13.4805	14.3642	14.1579	35.7855	9.70818	5.0895	48.4655	32.1585	37.568	45.0234	1.81537	4.40647	3.52543	40.4634
3	88461065	88477033	15968	+	ENSMUSG00000008604	protein_coding	ENSMUSG00000008604	Ubqln4	ensembl_havana	12	ensembl_havana | havana	611.848	598.041	743.561	830.598	842.81	716.249	744.34	278.228	485.056	609.437	512.993	1652.9	2362.76	1941.62	2010.76
17	34170973	34174976	4003	-	ENSMUSG00000008668	protein_coding	ENSMUSG00000008668	Rps18	ensembl_havana	16	ensembl_havana | havana	3494.53	5100.05	4108.62	4776.77	3342.34	3951.31	4918.4	663.238	2306.15	1783.3	2042.18	3659.45	7603.21	5768.66	4183.81
X	73314418	73316742	2324	+	ENSMUSG00000008682	protein_coding	ENSMUSG00000008682	Rpl10	ensembl_havana	14	ensembl_havana | havana	559.237	752.785	710.781	778.531	642.56	1010.56	480.05	142.545	344.23	341.177	317.8	416.112	1094.39	1135.29	901.943
7	117703595	117715412	11817	-	ENSMUSG00000008683	protein_coding	ENSMUSG00000008683	Rps15a	ensembl_havana	17	ensembl | ensembl_havana | havana	5268.04	4818.78	5844.9	4996.72	4704.76	4512.1	4117.3	1212.72	2789.51	2337.03	2462.28	4342.07	7622.91	5974.56	5580.46
15	89239922	89257030	17108	+	ENSMUSG00000008690	protein_coding	ENSMUSG00000008690	Ncaph2	ensembl_havana	16	ensembl_havana | havana	3407.25	2383.95	4139.85	3401.46	2825.38	2966.5	3133.81	1297.23	2289.34	2154.55	2109.65	4583.57	3744.6	2966.04	3199.94
3	103647131	103698880	51749	-	ENSMUSG00000008730	protein_coding	ENSMUSG00000008730	Hipk1	ensembl_havana	18	ensembl_havana | havana	10558.7	10451.8	9379.31	11335.8	11424	12630.4	17289.2	6304.76	13302.8	11834.1	16878.9	5225.47	4547.32	5222.77	5556.29
7	118571270	118594435	23165	-	ENSMUSG00000008734	protein_coding	ENSMUSG00000008734	Gprc5b	ensembl_havana	10	ensembl_havana | havana	14.6181	30.6374	16.8991	21.2447	6.16991	10.0421	6.36188	17.454	22.7789	29.2196	17.7365	60.3281	46.6712	42.5589	59.1461
3	100469524	100592820	123296	-	ENSMUSG00000008763	protein_coding	ENSMUSG00000008763	Man1a2	ensembl_havana	17	ensembl_havana | havana	1612.85	1491.43	1222.65	1722.55	1685.62	1723.74	1749.52	646.205	1156.36	1127.04	1247.01	1463.19	2037.55	1708.06	1873.72
12	85319172	85335213	16041	-	ENSMUSG00000008822	protein_coding	ENSMUSG00000008822	Acyp1	ensembl_havana	16	ensembl_havana | havana	190.077	134.805	147.867	178.389	132.036	126.206	237.934	87.9558	175.532	163.838	177.365	271.398	325.198	274.102	270.191
6	124281615	124307487	25872	+	ENSMUSG00000008845	protein_coding	ENSMUSG00000008845	Cd163	ensembl_havana	10	ensembl_havana | havana	422.893	480.395	270.385	399.253	45.6574	414.216	207.397	100.521	205.01	213.929	201.923	205.137	180.666	159.526	230.38
11	102085258	102120993	35735	-	ENSMUSG00000008855	protein_coding	ENSMUSG00000008855	Hdac5	ensembl_havana	18	ensembl_havana | havana	1784.93	1670.35	1546.26	1971.72	1013.1	2041.96	2376.8	532.222	954.033	762.839	844.53	1385.13	918.308	849.626	672.868
13	18055156	18118825	63669	-	ENSMUSG00000008859	protein_coding	ENSMUSG00000008859	Rala	ensembl_havana	9	ensembl_havana | havana	977.382	1058.83	866.924	859.856	686.094	893.154	904.659	322.206	590.912	457.077	473.428	365.797	518.201	347.254	432.698
8	23067091	23083830	16739	-	ENSMUSG00000008892	protein_coding	ENSMUSG00000008892	Vdac3	ensembl_havana	13	ensembl | ensembl_havana | havana	1046.26	1000.36	918.409	1269.74	882.058	1192.74	1144.48	407.306	896.053	831.292	758.52	646.816	1727.72	1351.51	1244.9
3	95018333	95030363	12030	+	ENSMUSG00000008958	protein_coding	ENSMUSG00000008958	Vps72	ensembl_havana	15	ensembl_havana | havana	671.456	469.365	685.257	572.922	625.629	512.376	620.919	253.097	294.786	374.636	301.52	988.47	789.571	686.577	701.583
16	84631813	84660668	28855	+	ENSMUSG00000008976	protein_coding	ENSMUSG00000008976	Gabpa	ensembl_havana	17	ensembl_havana | havana	1716.32	1506.13	1576.9	2042.52	1918.85	1683.79	1825.53	783.525	1400.23	1299.23	1343.88	2010.35	2149.85	1794.82	2027.84
2	172709805	172782115	72310	-	ENSMUSG00000008999	protein_coding	ENSMUSG00000008999	Bmp7	ensembl_havana	8	ensembl_havana | havana	4.49888	17.1569	7.60459	16.0456	72.805	2.15737	8.90663	23.3352	21.439	28.176	19.1008	8.16917	9.69424	8.81356	8.48427
5	115435169	115439059	3890	-	ENSMUSG00000009013	protein_coding	ENSMUSG00000009013	Dynll1	ensembl_havana	6	ensembl_havana | havana	1753.43	1533.09	1079.01	2031.18	1804.08	2740.94	2369.16	683.903	1922.81	1466.2	1731.35	1104.65	3259.02	2291.54	2362.56
2	37240086	37249345	9259	-	ENSMUSG00000009030	protein_coding	ENSMUSG00000009030	Pdcl	ensembl_havana	15	ensembl_havana | havana	812.047	924.028	677.652	1144.91	900.807	865.104	1063.7	367.08	862.92	749.273	687.632	781.519	980.886	858.441	788.382
15	79244884	79287770	42886	-	ENSMUSG00000009035	protein_coding	ENSMUSG00000009035	Tmem184b	ensembl_havana	16	ensembl_havana | havana	1168.58	779.417	1269.98	988.225	573.8	1173.61	1236.75	207.325	384.561	314.109	376.558	392.12	290.827	322.577	356.991
11	4715845	4799537	83692	-	ENSMUSG00000009073	protein_coding	ENSMUSG00000009073	Nf2	ensembl_havana	17	ensembl_havana | havana	1075.23	927.7	1075.63	1092.99	1129.09	996.707	1127.32	344.643	541.334	572.911	600.311	2687.65	1683.28	1611.11	1854.8
11	4686892	4696779	9887	-	ENSMUSG00000009075	protein_coding	ENSMUSG00000009075	Cabp7	ensembl_havana	3	ensembl_havana	3.68657	12.1737	11.9166	19.6222	46.2954	17.724	8.29233	7.30299	8.74193	16.7191	4.3301	15.7342	15.4187	10.474	12.4062
11	4654678	4687670	32992	+	ENSMUSG00000009076	protein_coding	ENSMUSG00000009076	Zmat5	ensembl_havana	11	ensembl_havana | havana	160.523	207.19	189.183	224.838	222.713	232.531	290.716	70.7802	206.988	109.551	118.461	289.248	270.121	180.78	164.458
11	5019689	5049267	29578	-	ENSMUSG00000009079	protein_coding	ENSMUSG00000009079	Ewsr1	ensembl_havana	17	ensembl_havana | havana	4304.35	3463.7	4013.48	5440.01	4446.35	4081.6	3936.66	2149.52	2990.26	3386.3	3041.9	7452.89	7614	6118.5	5648.16
11	4936824	4992792	55968	+	ENSMUSG00000009090	protein_coding	ENSMUSG00000009090	Ap1b1	ensembl_havana	18	ensembl | havana	1925.53	2540.48	1689.93	2202.97	1383.3	2278.2	2398.38	687.493	1555.67	1703.07	1725.9	4025.54	3295.07	3034.53	3252.01
10	75729247	75731776	2529	+	ENSMUSG00000009092	protein_coding	ENSMUSG00000009092	Derl3	ensembl_havana	6	ensembl_havana | havana	30.3674	204.658	50.6972	34.9228	75.273	44.2262	86.5216	38.5929	48.2377	39.6551	35.473	24.5075	33.4892	51.1187	47.6424
3	108000105	108008749	8644	+	ENSMUSG00000009108	protein_coding	ENSMUSG00000009108	Gnat2	ensembl_havana	16	ensembl_havana | havana	1.12472	6.12748	10.9844	14.1579	11.1058	7.55081	6.36188	11.6676	6.69968	8.34844	9.55041	29.0459	17.6259	41.4238	23.4949
6	120813173	120869804	56631	+	ENSMUSG00000009112	protein_coding	ENSMUSG00000009112	Bcl2l13	ensembl_havana	5	ensembl_havana | havana	1083.8	1165.8	1226.66	1378.86	1135.61	1222.69	1601.06	635.18	1299.41	1271.95	1458.43	2603.65	2120.03	1973.31	2275.84
6	83034825	83044300	9475	+	ENSMUSG00000009145	protein_coding	ENSMUSG00000009145	Dqx1	ensembl_havana	7	ensembl_havana | havana	53.9865	53.9218	42.2477	35.8667	38.2535	47.4622	33.0818	21.5402	34.8383	49.0471	40.9303	56.2765	27.3201	56.4068	47.6424
2	74350635	74409780	59145	-	ENSMUSG00000009207	protein_coding	ENSMUSG00000009207	Lnpk	ensembl_havana	16	ensembl_havana | havana	585.978	707.111	648.924	996.715	818.13	735.664	1017.9	419.136	995.575	1047.73	926.391	398.474	688.291	765.898	621.961
6	48546630	48549724	3094	-	ENSMUSG00000009281	protein_coding	ENSMUSG00000009281	Rarres2	ensembl_havana	7	ensembl_havana | havana	10.3958	20.5901	18.2454	6.62891	23.4216	16.4444	10.2882	13.8421	30.4881	13.2092	13.4262	1.52474	5.06721	1.76271	21.8113
10	77417554	77434567	17013	+	ENSMUSG00000009291	protein_coding	ENSMUSG00000009291	Pttg1ip	ensembl_havana	14	ensembl_havana | havana	1521.74	1841.92	1512.47	1731.04	1359.85	1652.55	1764.78	529.53	1116.17	1045.64	1065.55	1109.19	1438.27	1263.86	1084.03
10	77743556	77806398	62842	-	ENSMUSG00000009292	protein_coding	ENSMUSG00000009292	Trpm2	ensembl_havana	19	ensembl_havana | havana	1456.51	1447.31	1382.35	1598.89	2625.92	2011.75	2203.76	1249.33	1929.51	1491.24	1736.81	361.259	112.806	210.644	139.664
10	77458109	77481828	23719	+	ENSMUSG00000009293	protein_coding	ENSMUSG00000009293	Ube2g2	ensembl_havana	18	ensembl_havana | havana	961.634	1210.44	1122.81	934.421	1085.91	939.535	1146.41	326.693	710.069	587.522	639.878	1097.19	1009.96	755.322	827.934
11	87684407	87695240	10833	+	ENSMUSG00000009350	protein_coding	ENSMUSG00000009350	Mpo	ensembl_havana	14	ensembl_havana | havana	9573.73	14093.7	33516	56934.4	31825.5	8584.26	33057	12232	24749.1	25838.8	21256.1	119961	124161	88136.9	79424.8
6	17463799	17573980	110181	+	ENSMUSG00000009376	protein_coding	ENSMUSG00000009376	Met	ensembl_havana	16	ensembl | havana	2508.14	1117.66	1400.93	3264.75	1604.17	2263.09	2574.02	284.511	606.991	619.87	493.893	1100.11	1508.77	863.728	1495.18
X	20799634	20816848	17214	-	ENSMUSG00000009406	protein_coding	ENSMUSG00000009406	Elk1	ensembl_havana	14	ensembl_havana | havana	249.688	270.835	229.827	277.495	170.29	309.583	239.207	97.8284	144.713	162.795	155.535	206.952	191.241	162.17	179.475
1	135362318	135615844	253526	-	ENSMUSG00000009418	protein_coding	ENSMUSG00000009418	Nav1	ensembl_havana	17	ensembl | ensembl_havana | havana	1304.97	2015.79	1267.32	1358.64	219.649	1754.79	1079.65	181.111	224.296	253.494	342.315	1286.44	445.324	774.929	822.382
13	98975527	99062893	87366	-	ENSMUSG00000009470	protein_coding	ENSMUSG00000009470	Tnpo1	ensembl_havana	18	ensembl_havana | havana	3693.33	4262.42	4374.86	5276.43	4398.69	5193.38	4876.38	1417.61	3074.16	3083.23	3423.08	3880.69	6974.52	6213.39	5133.21
18	68433426	68457924	24498	+	ENSMUSG00000009535	protein_coding	ENSMUSG00000009535	Rnmt	ensembl_havana	14	ensembl_havana | havana	697.326	807.601	960.714	1205.31	694.733	971.897	853.763	287.203	628.429	620.915	579.846	1180.9	1622.46	1337.01	1204.76
2	118306331	118310193	3862	-	ENSMUSG00000009549	protein_coding	ENSMUSG00000009549	Srp14	ensembl_havana	15	ensembl_havana | havana	1044.87	932.603	895.652	866.458	800.854	848.929	939.016	321.308	660.59	539.518	503.442	906.777	955.328	765.013	710.068
2	32622632	32631029	8397	-	ENSMUSG00000009551	protein_coding	ENSMUSG00000009551	6330409D20Rik	ensembl_havana	3	ensembl_havana | havana	24.7438	40.4414	49.0073	46.2491	23.4457	33.4393	27.9923	16.1551	22.7789	13.5662	23.1939	24.5075	2.64388	11.4576	12.4001
2	32595796	32603089	7293	-	ENSMUSG00000009555	protein_coding	ENSMUSG00000009555	Cdk9	ensembl_havana	17	ensembl_havana | havana	2170.7	2015.94	2799.31	2235.05	1651.07	2271.72	2716.53	537.609	1169.77	1143.74	1092.84	2640.45	1640.09	1531.8	1389.46
2	32647246	32652257	5011	+	ENSMUSG00000009563	protein_coding	ENSMUSG00000009563	Tor2a	ensembl_havana	17	ensembl_havana | havana	794.049	752.454	635.199	711.67	867.215	700.066	932.294	180.372	379.202	334.981	342.443	652.627	713.85	576.404	526.025
2	32572621	32594158	21537	-	ENSMUSG00000009566	protein_coding	ENSMUSG00000009566	Fpgs	ensembl_havana	13	ensembl_havana | havana	179.955	180.148	300.803	286.933	171.523	161.803	185.767	87.0583	138.013	194.101	197.83	1247.16	1227.64	1082.31	972.433
16	13074345	13235394	161049	+	ENSMUSG00000009569	protein_coding	ENSMUSG00000009569	Mrtfb	ensembl_havana	15	ensembl | ensembl_havana | havana	458.886	493.875	381.92	466.267	271.476	447.656	468.233	134.626	195.631	233.757	274.233	696.833	320.791	472.406	533.202
15	103099971	103148244	48273	-	ENSMUSG00000009575	protein_coding	ENSMUSG00000009575	Cbx5	ensembl_havana	15	ensembl_havana | havana	4406.62	2560.07	4660.74	6238.04	4333.75	4555.32	4486.42	2436.74	4636.09	5499.46	6254.17	9546.12	12458.5	11438.3	12252.8
15	79775860	79800108	24248	+	ENSMUSG00000009585	protein_coding	ENSMUSG00000009585	Apobec3	ensembl_havana	19	ensembl | havana	2251.35	1567.54	1915.46	1629.72	2024.13	651.666	1580.37	867.73	1394.87	1626.75	1650.81	2204.03	2934.88	2833.53	3148.7
2	27152116	27317046	164930	-	ENSMUSG00000009621	protein_coding	ENSMUSG00000009621	Vav2	ensembl_havana	19	ensembl_havana | havana	911.027	1042.89	1025.78	836.259	368.96	1176.86	664.182	198.349	385.902	379.854	482.978	749.75	616.909	549.085	468.593
8	34006766	34075611	68845	+	ENSMUSG00000009628	protein_coding	ENSMUSG00000009628	Tex15	ensembl_havana	15	ensembl_havana | havana	301.425	421.57	161.386	379.432	212.245	419.609	657.818	291.69	615.031	480.035	437.954	17.246	12.3381	9.69492	12.4001
8	34089653	34109470	19817	+	ENSMUSG00000009630	protein_coding	ENSMUSG00000009630	Ppp2cb	ensembl_havana	11	ensembl_havana	1053.86	1134.81	1030.84	1356.33	1259.9	1307.37	1739.34	422.726	1086.69	1070.69	799.506	699.825	1314.01	990.645	857.564
1	192954469	192955526	1057	-	ENSMUSG00000009633	protein_coding	ENSMUSG00000009633	G0s2	ensembl_havana	4	ensembl_havana	311.547	314.952	592.313	302.035	872.426	241.626	743.068	555.558	710.166	599.001	482.978	65.3534	20.2698	35.2543	37.2002
4	117531878	117539471	7593	-	ENSMUSG00000009640	protein_coding	ENSMUSG00000009640	Dmap1	ensembl_havana	12	ensembl_havana | havana	349.788	373.776	381.075	429.456	324.537	339.786	339.724	134.626	190.271	271.324	218.295	547.336	534.945	461.832	458.152
10	59282806	59452515	169709	-	ENSMUSG00000009647	protein_coding	ENSMUSG00000009647	Mcu	ensembl_havana	14	ensembl_havana | havana	656.738	780.534	766.236	779.629	1203.07	632.11	1198.55	523.228	999.594	1057.12	910.019	517.34	642.464	611.662	653.896
10	74896424	75020754	124330	+	ENSMUSG00000009681	protein_coding	ENSMUSG00000009681	Bcr	ensembl_havana	11	ensembl_havana | havana	1398.02	629.905	1568.23	1327.07	888.468	1587.83	1226.57	429.906	641.829	609.437	832.251	2324.59	1389.8	1253.29	1353.57
7	30732147	30741907	9760	-	ENSMUSG00000009687	protein_coding	ENSMUSG00000009687	Fxyd5	ensembl_havana	15	ensembl_havana | havana	4933.02	5056.4	3640.91	4580.56	4181.96	5215.43	5361.76	1379.47	2532.48	2429.4	2090.18	1441.4	1774.93	1519.46	1301.36
X	7688528	7704520	15992	+	ENSMUSG00000009731	protein_coding	ENSMUSG00000009731	Kcnd1	ensembl_havana	5	ensembl_havana | havana	43.864	58.8238	49.0073	22.6526	13.5738	57.1704	34.3542	35.0028	28.1387	25.0453	43.659	24.5075	18.5072	19.3898	41.7687
15	100395893	100449890	53997	-	ENSMUSG00000009733	protein_coding	ENSMUSG00000009733	Tfcp2	ensembl_havana	10	ensembl_havana | havana	98.9753	90.6867	105.619	121.758	104.889	98.1605	89.0663	90.6483	103.175	129.401	126.884	300.444	238.831	332.272	349.161
15	100473199	100497866	24667	-	ENSMUSG00000009739	protein_coding	ENSMUSG00000009739	Pou6f1	ensembl_havana	18	ensembl | ensembl_havana | havana	94.4764	198.53	120.828	53.8	140.674	69.0359	38.1713	41.2854	80.3962	48.0035	66.8529	25.4152	9.69424	15.8644	35.895
9	113760002	113806271	46269	+	ENSMUSG00000009741	protein_coding	ENSMUSG00000009741	Ubp1	ensembl_havana	16	ensembl | havana	2006.74	2231.43	2311.86	2085.73	2089.41	2704.29	2076.6	1166.01	2189.15	2224.36	2540	1938.43	2023.51	1782.82	1947.1
1	132243864	132261227	17363	+	ENSMUSG00000009772	protein_coding	ENSMUSG00000009772	Nuak2	ensembl_havana	16	ensembl_havana | havana	1305.79	1213.24	1695.83	1029.75	1349.98	1498.31	1206.21	220.787	584.213	485.253	664.436	884.996	890.992	772.95	655.246
9	78016474	78079390	62916	+	ENSMUSG00000009828	protein_coding	ENSMUSG00000009828	Cilk1	ensembl_havana	16	ensembl_havana | havana	93.3517	112.746	121.673	155.737	111.058	119.734	103.062	68.2106	109.875	76.1795	103.69	422.982	391.295	389.56	377.224
4	140688514	140706505	17991	+	ENSMUSG00000009863	protein_coding	ENSMUSG00000009863	Sdhb	ensembl_havana	15	ensembl_havana | havana	1653.34	1061.28	1283.49	1469.58	1686.85	1403.36	1740.61	468.5	807.981	778.491	724.467	1490.42	1826.04	1301.76	1434.48
11	59297960	59342013	44053	-	ENSMUSG00000009894	protein_coding	ENSMUSG00000009894	Snap47	ensembl_havana	16	ensembl_havana | havana	84.3539	134.805	59.9917	97.2176	142.347	50.6983	105.607	35.9003	71.0166	67.8311	46.3877	172.46	207.104	160.407	165.119
1	106648189	106687458	39269	-	ENSMUSG00000009905	protein_coding	ENSMUSG00000009905	Kdsr	ensembl_havana	6	ensembl_havana | havana	442.015	421.571	606.677	563.484	482.487	607.301	484.775	136.421	320.245	322.459	332.9	783.332	1003.79	822.306	745.962
1	106691801	106724459	32658	-	ENSMUSG00000009907	protein_coding	ENSMUSG00000009907	Vps4b	ensembl_havana	18	ensembl_havana | havana	2578.32	2437.51	2439.96	2637.52	2492.81	2324.29	2811	1003.16	1764.91	1616.67	1529.1	1909.41	2237.01	1826.01	1967.87
9	44318436	44321725	3289	+	ENSMUSG00000009927	protein_coding	ENSMUSG00000009927	Rps25	ensembl_havana	10	ensembl_havana | havana	5122.02	4405.53	4742.72	5059.83	4145.19	4331.83	4000.3	1188.83	2676.25	2644.73	2327.32	3257	7030.87	5269.65	4875.9
X	73325518	73333758	8240	+	ENSMUSG00000009995	protein_coding	ENSMUSG00000009995	Taz	ensembl_havana	18	ensembl_havana | havana	782.804	1392.16	948.038	1076	735.454	1064.66	1006.45	296.178	612.351	526.995	568.932	627.211	790.52	887.526	647.416
11	114656214	114681566	25352	+	ENSMUSG00000010021	protein_coding	ENSMUSG00000010021	Kif19a	ensembl_havana	14	ensembl_havana | havana	47.2382	40.4414	12.6743	32.0912	29.6156	19.4164	11.4514	20.6427	13.3994	24.0018	25.9225	14.523	10.5755	7.93221	7.179
11	61114243	61158291	44048	-	ENSMUSG00000010025	protein_coding	ENSMUSG00000010025	Aldh3a2	ensembl_havana	20	ensembl_havana | havana	1611.73	1784.31	1577.52	1749.91	1742.38	1733.44	2334.81	694.669	1428.37	1084.26	1116.04	609.056	653.04	557.898	535.814
9	107411144	107415873	4729	+	ENSMUSG00000010045	protein_coding	ENSMUSG00000010045	Tmem115	ensembl_havana	3	ensembl_havana	628.718	606.62	571.189	680.523	583.674	688.202	830.861	157.064	451.559	393.42	376.559	513.75	838.111	607.255	544.298
9	107445144	107449979	4835	+	ENSMUSG00000010047	protein_coding	ENSMUSG00000010047	Hyal2	ensembl_havana	13	ensembl | havana	57.3607	91.9122	76.8908	119.87	85.1448	100.318	78.8873	30.5153	109.875	105.399	106.419	284.106	365.739	292.61	253.875
9	107464841	107470585	5744	+	ENSMUSG00000010048	protein_coding	ENSMUSG00000010048	Ifrd2	ensembl_havana	11	ensembl_havana | havana	315.078	226.717	397.49	535.939	521.733	364.231	499.179	613.706	1127.53	1207.64	1277.44	2554.29	2486.17	1945.59	2300.55
9	107454126	107458910	4784	+	ENSMUSG00000010051	protein_coding	ENSMUSG00000010051	Hyal1	ensembl_havana	16	ensembl_havana | havana	29.6042	18.1957	23.0863	20.9994	16.3771	38.3569	18.1209	32.4713	29.3166	37.9809	48.0662	32.0626	20.2099	41.0594	22.2421
9	107440454	107443312	2858	+	ENSMUSG00000010054	protein_coding	ENSMUSG00000010054	Tusc2	ensembl_havana	5	ensembl_havana | havana	359.044	319.833	377.359	326.31	273.585	297.699	318.297	145.396	275.619	243.148	244.218	320.377	508.317	373.695	390.564
9	107419425	107422906	3481	+	ENSMUSG00000010057	protein_coding	ENSMUSG00000010057	Nprl2	ensembl_havana	9	ensembl_havana | havana	219.32	248.776	207.014	267.112	261.604	293.403	260.837	89.7508	152.753	123.14	102.326	165.199	325.198	289.966	183.391
9	107276811	107406543	129732	+	ENSMUSG00000010066	protein_coding	ENSMUSG00000010066	Cacna2d2	ensembl_havana	16	ensembl | ensembl_havana | havana	11.2472	6.12748	17.744	18.8772	22.2117	7.55081	10.179	24.2327	29.4786	28.176	20.4652	16.3383	5.28777	13.2203	11.0948
9	107428754	107439467	10713	+	ENSMUSG00000010067	protein_coding	ENSMUSG00000010067	Rassf1	ensembl_havana	14	ensembl_havana | havana	1008.38	1043.95	1067.82	1071.03	839.828	1163.42	969.95	194.403	406.602	374.804	441.037	870.671	715.04	718.816	602.585
19	8684246	8700734	16488	-	ENSMUSG00000010095	protein_coding	ENSMUSG00000010095	Slc3a2	ensembl_havana	14	ensembl_havana | havana	1122.47	1398.29	1389.94	1135.46	1754.73	1027.99	1194.76	620.176	1173.78	1238.7	1345.24	2218.34	1935.32	1804.14	1734.7
19	8734437	8748287	13850	+	ENSMUSG00000010097	protein_coding	ENSMUSG00000010097	Nxf1	ensembl_havana	16	ensembl_havana | havana	2402.39	2280.66	2100.56	2353.04	1926.25	2716.14	1893.29	745.831	1380.13	1428.63	1698.61	1977.86	2897.7	2817.7	2464.35
19	8718777	8733434	14657	+	ENSMUSG00000010110	protein_coding	ENSMUSG00000010110	Stx5a	ensembl_havana	18	ensembl_havana | havana	1356.41	1404.42	1129.7	1580.02	1632.56	1808.96	1453.05	571.713	1041.13	967.376	1156.96	856.855	1141.28	1181.02	1031.82
11	61017581	61040199	22618	+	ENSMUSG00000010142	protein_coding	ENSMUSG00000010142	Tnfrsf13b	ensembl_havana	13	ensembl | havana	1737.69	1753.69	1644.28	1933.97	1003.23	1530.66	1549.75	343.746	696.767	686.659	566.204	739.763	797.573	687.458	683.963
8	124059452	124096255	36803	+	ENSMUSG00000010154	protein_coding	ENSMUSG00000010154	Spire2	ensembl_havana	8	ensembl_havana | havana	10.1225	9.80397	0.844954	2.83158	24.6797	4.31475	1.27238	12.5651	20.099	17.7404	10.9148	92.5839	75.7914	82.8476	70.4847
9	20985454	21003305	17851	-	ENSMUSG00000010205	protein_coding	ENSMUSG00000010205	Raver1	ensembl_havana	12	ensembl_havana	1587.11	1125.37	2026.39	1285.28	1260.67	1125.35	1664.94	355.92	595.575	608.444	660.455	3470.52	1412.41	1853.38	2194.04
11	78152578	78181450	28872	+	ENSMUSG00000010277	protein_coding	ENSMUSG00000010277	2610507B11Rik	ensembl_havana	8	ensembl_havana | havana	4673.22	4357.85	3798.05	5134.63	4254.79	4566.11	4974.99	1389.34	2951.88	3029.44	3102.52	7100.03	6443.12	6110.46	6302.48
1	43137870	43155108	17238	+	ENSMUSG00000010290	protein_coding	ENSMUSG00000010290	AI597479	ensembl_havana	8	ensembl_havana	265.434	411.767	291.509	458.716	283.816	400.193	396.981	158.859	349.723	314.11	278.326	372.151	770.252	641.628	526.025
7	46700349	46704526	4177	+	ENSMUSG00000010307	protein_coding	ENSMUSG00000010307	Tmem86a	ensembl_havana	8	ensembl_havana | havana	318.296	246.325	356.571	370.937	193.735	432.553	374.079	43.0804	108.535	103.312	88.6824	69.8918	51.9964	51.1187	41.7687
11	101339233	101349525	10292	+	ENSMUSG00000010358	protein_coding	ENSMUSG00000010358	Ifi35	ensembl_havana	14	ensembl_havana | havana	1842.29	910.544	1297.62	1109.98	792.216	1351.44	1127.29	205.529	511.856	443.511	390.203	531.833	671.547	438.838	505.79
11	101518021	101526927	8906	+	ENSMUSG00000010362	protein_coding	ENSMUSG00000010362	Rdm1	ensembl_havana	10	ensembl_havana | havana	339.665	281.864	227.293	384.151	249.265	277.222	381.713	91.5458	254.588	201.406	156.9	168.83	227.374	162.17	126.611
14	55899720	55909582	9862	-	ENSMUSG00000010376	protein_coding	ENSMUSG00000010376	Nedd8	ensembl_havana	16	ensembl | ensembl_havana | havana	1889.53	1475.48	1560.57	1403.47	1574.54	1417.37	1669.36	541.081	980.833	817.044	780.393	1390.56	1817.18	1329.07	1630.89
11	76617428	76654406	36978	-	ENSMUSG00000010392	protein_coding	ENSMUSG00000010392	Gosr1	ensembl_havana	9	ensembl_havana | havana	858.161	925.249	555.135	1077.89	903.275	872.657	994.998	325.795	672.648	584.391	618.048	655.349	834.586	810.848	728.995
14	54664366	54667214	2848	+	ENSMUSG00000010406	protein_coding	ENSMUSG00000010406	Mrpl52	ensembl_havana	13	ensembl_havana | havana	890.78	692.405	748.629	386.039	583.674	474.622	609.467	108.599	167.492	203.493	155.535	1013.89	764.966	564.947	729.651
1	36374811	36408263	33452	-	ENSMUSG00000010453	protein_coding	ENSMUSG00000010453	Kansl3	ensembl_havana	13	ensembl_havana | havana	1312.55	1348.04	1392.48	1382.74	1047.65	1542.52	1235.48	327.591	675.329	660.569	706.73	1445.94	1289.34	1311.46	1292.88
10	22978862	23226685	247823	-	ENSMUSG00000010461	protein_coding	ENSMUSG00000010461	Eya4	ensembl_havana	17	ensembl_havana | havana	3.37416	7.35298	15.2092	27.3719	9.87186	15.1016	6.36188	42.1829	37.5182	44.8729	43.659	4.53843	7.05036	4.40678	14.358
2	181220273	181226964	6691	+	ENSMUSG00000010492	lncRNA	ENSMUSG00000010492	Uckl1os	havana	11	havana	72.3842	159.644	138.575	63.8022	79.7591	140.063	103.116	31.5787	32.1585	60.0313	70.8272	79.1479	57.3969	83.6324	68.6489
4	109533785	109821158	287373	+	ENSMUSG00000010517	protein_coding	ENSMUSG00000010517	Faf1	ensembl_havana	8	ensembl_havana | havana	1164.08	1147.07	840.727	1261	1342.58	1253.44	1374.17	526.838	1117.51	1130.17	929.12	989.375	1445.32	1329.09	1273.95
3	88190064	88204307	14243	-	ENSMUSG00000010538	protein_coding	ENSMUSG00000010538	Tsacc	ensembl_havana	15	ensembl_havana | havana	10.1225	14.706	30.4183	14.1579	16.0418	11.8656	19.0856	1.79502	5.35975	6.26133	4.09303	26.3229	36.1331	33.4915	23.4949
11	74661656	74719352	57696	+	ENSMUSG00000010554	protein_coding	ENSMUSG00000010554	Mettl16	ensembl_havana	15	ensembl_havana | havana	451.012	366.423	444.445	534.225	510.869	500.511	413.522	280.92	325.604	421.596	383.381	1427.8	1623.34	1320.27	1510.2
9	22068142	22069655	1513	+	ENSMUSG00000010607	protein_coding	ENSMUSG00000010607	Pigyl	ensembl_havana	9	ensembl_havana | havana	150.712	169.118	283.06	133.084	197.437	113.262	161.592	54.748	89.7757	72.0053	57.3025	232.367	135.719	97.8306	138.359
12	83678010	83729898	51888	+	ENSMUSG00000010608	protein_coding	ENSMUSG00000010608	Rbm25	ensembl_havana	16	ensembl_havana | havana	2851.54	3039.09	3024.86	3465.44	2816.69	3592.83	2461.58	1445.67	2276.14	2489.92	2358.31	4098.77	5518.23	4600.34	3911.24
1	180054569	180091004	36435	-	ENSMUSG00000010609	protein_coding	ENSMUSG00000010609	Psen2	ensembl_havana	16	ensembl_havana | havana	818.796	901.964	789.186	613.509	1152.54	636.426	905.935	293.485	406.001	411.161	403.845	1022.05	896.276	809.086	830.804
19	10160252	10174242	13990	+	ENSMUSG00000010663	protein_coding	ENSMUSG00000010663	Fads1	ensembl_havana	6	ensembl_havana | havana	516.247	383.581	523.873	547.439	322.069	570.627	412.25	234.25	455.577	530.124	581.211	1091.95	1081.36	1077.9	1260.24
5	29434800	29583389	148589	-	ENSMUSG00000010721	protein_coding	ENSMUSG00000010721	Lmbr1	ensembl_havana	16	ensembl | ensembl_havana | havana	50.6124	34.3139	27.8835	96.2737	75.2729	38.8327	72.5254	32.3103	52.2575	43.8293	42.2947	77.1533	90.7733	105.763	96.5901
7	143188543	143203399	14856	-	ENSMUSG00000010751	protein_coding	ENSMUSG00000010751	Tnfrsf22	ensembl_havana	16	ensembl | havana	77.6056	79.8979	70.2665	63.5146	61.1255	53.7486	56.5255	22.3345	28.8757	60.2531	50.4808	66.261	53.4862	87.5714	105.543
7	143110967	143153828	42861	-	ENSMUSG00000010755	protein_coding	ENSMUSG00000010755	Cars	ensembl_havana	18	ensembl_havana | havana	574.731	580.884	567.808	538.943	855.151	437.946	618.375	306.948	527.935	605.262	578.482	1177.27	846.043	713.899	816.449
15	79400612	79411941	11329	+	ENSMUSG00000010830	protein_coding	ENSMUSG00000010830	Kdelr3	ensembl_havana	9	ensembl_havana	17.9955	29.4119	34.6431	16.0456	20.9777	34.518	15.2685	5.38505	4.01981	10.4356	23.1939	20.8768	20.2698	14.9831	19.5791
2	102904020	102922990	18970	+	ENSMUSG00000010911	protein_coding	ENSMUSG00000010911	Apip	ensembl_havana	13	ensembl_havana | havana	365.534	223.04	237.432	277.495	294.923	226.524	288.829	143.601	215.73	265.063	188.279	316.783	460.919	317.288	400.068
2	102851420	102903859	52439	-	ENSMUSG00000010914	protein_coding	ENSMUSG00000010914	Pdhx	ensembl_havana	11	ensembl_havana | havana	394.776	389.708	544.996	472.873	382.534	404.507	456.783	156.167	343.024	341.242	246.946	520.104	675.954	545.56	650.681
8	111345217	111447031	101814	+	ENSMUSG00000010936	protein_coding	ENSMUSG00000010936	Vac14	ensembl_havana	12	ensembl_havana | havana	1149.46	1208.34	1238.7	1238.34	987.182	1307.36	1236.76	297.973	549.374	544.735	626.233	1494.95	1410.96	1164.27	1127.75
3	145855588	145901269	45681	+	ENSMUSG00000011008	protein_coding	ENSMUSG00000011008	Mcoln2	ensembl_havana	14	ensembl_havana | havana	66.3584	91.9122	107.309	67.014	38.2535	53.9343	27.9923	14.3601	48.2377	44.8729	60.0312	67.1687	48.4712	61.6949	47.6424
7	44498415	44504846	6431	+	ENSMUSG00000011096	protein_coding	ENSMUSG00000011096	Akt1s1	ensembl_havana	18	ensembl | ensembl_havana | havana	339.665	399.511	398.818	352.06	343.047	390.484	384.257	143.601	168.832	206.624	222.388	705.273	638.055	579.052	471.855
9	37560059	37568609	8550	-	ENSMUSG00000011114	protein_coding	ENSMUSG00000011114	Tbrg1	ensembl_havana	19	ensembl_havana | havana	598.072	1171.17	574.859	770.023	1067.23	619.986	779.206	362.124	690.198	735.965	555.014	1155.34	1331.16	1114.88	1162.55
12	112586479	112607795	21316	+	ENSMUSG00000011148	protein_coding	ENSMUSG00000011148	Adssl1	ensembl_havana	15	ensembl_havana | havana	1537.5	1498.79	1710.18	1841.45	1522.73	1465.93	2163.05	497.221	1290.35	954.853	804.961	1973.27	1329.87	1139.59	882.363
12	112923705	112964325	40620	-	ENSMUSG00000011158	protein_coding	ENSMUSG00000011158	Brf1	ensembl_havana	9	ensembl_havana | havana	1077.21	1009.71	1372.1	956.07	840.075	1024.73	868.872	377.668	624.399	592.739	638.472	1869.72	1217.88	1136.91	1206.55
12	116041346	116109882	68536	+	ENSMUSG00000011171	protein_coding	ENSMUSG00000011171	Vipr2	ensembl_havana	12	ensembl_havana | havana	12.3719	13.4805	16.8991	17.9333	64.1671	24.8098	8.90663	14.3601	8.03962	18.784	15.0078	17.246	50.2338	30.8475	45.6845
12	17594795	17601507	6712	+	ENSMUSG00000011179	protein_coding	ENSMUSG00000011179	Odc1	ensembl_havana	9	ensembl_havana | havana	1286.01	1315.15	1386.06	1306.89	1954.29	995.231	1117.88	2847.6	4651.68	5115.39	5480.61	5092.19	5703.47	4800.38	5506.53
11	45837670	45846322	8652	-	ENSMUSG00000011254	protein_coding	ENSMUSG00000011254	Thg1l	ensembl_havana	17	ensembl_havana | havana	299.175	205.883	316.858	298.26	309.73	226.524	305.37	97.8284	156.773	142.967	136.434	439.32	610.738	448.611	586.72
11	45946819	46038171	91352	+	ENSMUSG00000011256	protein_coding	ENSMUSG00000011256	Adam19	ensembl_havana	17	ensembl_havana | havana	2878.16	2200.57	2514.17	2109.68	1908.97	2411.96	3677.63	651.708	1105.13	1340.97	1343.71	155.182	13.2194	50.2373	104.422
4	123156144	123192719	36575	+	ENSMUSG00000011257	protein_coding	ENSMUSG00000011257	Pabpc4	ensembl_havana	20	ensembl_havana | havana	528.26	647.806	836.856	1000.91	885.106	583.565	816.559	812.765	1474.27	1659.03	1965.51	4230.38	3562.46	2883.82	2848.24
7	19197256	19230688	33432	+	ENSMUSG00000011263	protein_coding	ENSMUSG00000011263	Exoc3l2	ensembl_havana	17	ensembl | havana	14.6213	30.6374	58.3018	37.7544	29.6156	11.8656	24.1751	16.1551	25.4588	18.784	21.8295	171.553	132.194	160.407	82.2321
7	19311212	19314582	3370	+	ENSMUSG00000011267	protein_coding	ENSMUSG00000011267	Zfp296	ensembl_havana	9	ensembl_havana | havana	191.307	172.081	247.723	210.067	127.014	192.274	110.55	59.0143	99.1553	69.7989	72.3103	105.561	117.545	90.3474	82.5069
17	56418601	56424597	5996	-	ENSMUSG00000011305	protein_coding	ENSMUSG00000011305	Plin5	ensembl_havana	12	ensembl_havana	12.3719	25.7354	18.589	12.2702	43.1894	29.1245	54.7122	9.87259	24.1188	32.3502	16.3721	5.44611	6.16906	0.881356	1.95791
8	70495463	70524998	29535	+	ENSMUSG00000011306	protein_coding	ENSMUSG00000011306	Sugp1	ensembl_havana	8	ensembl_havana | havana	725.443	595.592	638.784	523.842	608.353	508.061	566.208	252.144	353.743	334.981	304.249	865.022	569.316	526.171	658.51
7	45120411	45138230	17819	-	ENSMUSG00000011382	protein_coding	ENSMUSG00000011382	Dhdh	ensembl_havana	9	ensembl_havana | havana	477.248	312.893	369.196	614.42	433.128	554.444	477.654	126.549	179.551	219.147	204.652	479.129	504.101	495.16	546.937
7	29515539	29530431	14892	+	ENSMUSG00000011427	protein_coding	ENSMUSG00000011427	Zfp790	ensembl_havana	17	ensembl_havana | havana	447.638	439.954	464.726	451.165	350.451	572.785	427.518	150.781	237.168	203.493	237.396	462.012	522.607	494.441	502.53
7	44545503	44552056	6553	+	ENSMUSG00000011658	protein_coding	ENSMUSG00000011658	Fuz	ensembl_havana	17	ensembl_havana | havana	355.405	479.501	300.263	415.416	235.805	318.673	348.173	116.796	177.99	213.096	178.931	482.72	513.098	510.689	459.802
7	27055808	27147112	91304	-	ENSMUSG00000011751	protein_coding	ENSMUSG00000011751	Sptbn4	ensembl_havana	17	ensembl | ensembl_havana | havana	6.74831	31.8629	11.8294	29.2596	11.1058	17.259	27.9923	12.5651	17.4192	14.6098	12.2791	15.4307	9.69424	8.81356	3.91582
19	41900362	41907100	6738	+	ENSMUSG00000011752	protein_coding	ENSMUSG00000011752	Pgam1	ensembl_havana	8	ensembl_havana | havana	5441.2	4153.44	6533.91	6608.1	8016.42	4871.55	8121.25	1810.01	3847.11	3619.25	2714.93	6129.48	6222.99	4890.42	5182.96
5	107892661	108022974	130313	-	ENSMUSG00000011831	protein_coding	ENSMUSG00000011831	Evi5	ensembl_havana	17	ensembl_havana | havana	1289.06	1046.53	1112.31	1480.15	900.176	1382.06	1244.5	738.316	1356.49	1435.66	1524.79	612.785	534.06	498.848	616.055
8	4216567	4261258	44691	+	ENSMUSG00000011832	protein_coding	ENSMUSG00000011832	Evi5l	ensembl_havana	17	ensembl | ensembl_havana | havana	275.382	374.673	304.056	343.937	172.758	310.134	270.203	87.6786	187.359	199.818	176.929	345.442	263.833	280.975	274.828
8	4303080	4306221	3141	+	ENSMUSG00000011837	protein_coding	ENSMUSG00000011837	Snapc2	ensembl_havana	5	ensembl_havana | havana	334.041	327.208	354.036	377.544	323.303	345.18	409.705	121.164	276.027	196.189	222.388	401.197	467.967	383.391	363.519
11	77384388	77398613	14225	+	ENSMUSG00000011877	protein_coding	ENSMUSG00000011877	Git1	ensembl_havana	14	ensembl_havana | havana	918.897	949.761	1205.75	1008.04	726.815	924.43	969.549	222.582	420.74	396.552	422.947	1755.44	1144.8	1096.41	988.082
5	114807459	114829046	21587	-	ENSMUSG00000011884	protein_coding	ENSMUSG00000011884	Gltp	ensembl_havana	14	ensembl_havana | havana	3348.29	2318.64	3770.19	2362.48	1514.1	2819.68	2738.16	421.829	921.876	865.107	866.359	1681.03	812.554	753.56	933.919
9	69896748	69915600	18852	+	ENSMUSG00000011958	protein_coding	ENSMUSG00000011958	Bnip2	ensembl_havana	18	ensembl | ensembl_havana | havana	3029.07	2624.51	2908.49	2784.28	2726.1	2945.62	3224.02	911.648	1861.02	1624.79	1495.28	1572.34	2082.32	1592.47	1543.21
15	98436570	98468805	32235	-	ENSMUSG00000011960	protein_coding	ENSMUSG00000011960	Ccnt1	ensembl_havana	13	ensembl | havana	1354.62	1466.85	1377.92	1809.25	1399.53	1920.46	1649.79	719.824	1536.01	1356.07	2005.89	1551.78	2685.95	2165.72	1946.23
12	55883109	55916522	33413	+	ENSMUSG00000012076	protein_coding	ENSMUSG00000012076	Brms1l	ensembl_havana	9	ensembl_havana | havana	282.305	252.452	247.572	304.867	177.693	272.908	208.67	114.881	230.469	185.753	191.008	185.757	344.586	299.661	276.718
16	17469072	17550756	81684	-	ENSMUSG00000012114	protein_coding	ENSMUSG00000012114	Med15	ensembl_havana	18	ensembl_havana | havana	1424.16	1265.94	1386.42	1226.15	1237.68	1318.59	1396.92	317.965	590.129	603.175	735.581	1426.01	809.1	975.712	1117.75
4	133696339	133728230	31891	-	ENSMUSG00000012117	protein_coding	ENSMUSG00000012117	Dhdds	ensembl_havana	14	ensembl_havana | havana	1019	875.004	824.675	1010.88	1147.6	1006.41	1276.2	362.593	695.427	649.092	712.189	1179.99	963.254	875.186	901.942
4	133788126	133819816	31690	+	ENSMUSG00000012123	protein_coding	ENSMUSG00000012123	Crybg2	ensembl_havana	18	ensembl_havana | havana	32.6169	50.2453	28.7284	32.0912	86.3788	23.7311	29.2646	26.0277	16.0792	31.3067	36.8373	10.8922	4.40647	7.93221	6.52636
4	133829881	133854905	25024	+	ENSMUSG00000012126	protein_coding	ENSMUSG00000012126	Ubxn11	ensembl_havana	17	ensembl_havana | havana	116.348	184.187	112.979	127.561	145.849	110.147	120.745	42.6874	62.2781	67.0695	79.8344	176.877	146.131	156.68	128.307
17	46568777	46593953	25176	-	ENSMUSG00000012296	protein_coding	ENSMUSG00000012296	Tjap1	ensembl_havana	17	ensembl | ensembl_havana | havana	204.699	247.55	224.758	317.137	197.437	295.56	321.911	104.111	164.812	180.535	214.202	454.75	417.733	302.305	277.37
14	4198305	4201874	3569	+	ENSMUSG00000012405	protein_coding	ENSMUSG00000012405	Rpl15	ensembl_havana	17	ensembl_havana | havana	8556.06	5368.36	6717.55	6105.77	6477.73	4899.18	5238.69	2172.19	3429.68	3060.28	2651.76	3560.75	10491.1	7493.43	9257.48
13	90237242	90292027	54785	+	ENSMUSG00000012422	protein_coding	ENSMUSG00000012422	Tmem167	ensembl_havana	15	ensembl_havana | havana	1372.16	1658.1	1053.66	2042.51	1319.13	2025.77	2079.06	538.505	1266.24	1108.26	949.584	686.21	1832.21	1631.39	1422.75
5	8010457	8032214	21757	+	ENSMUSG00000012428	protein_coding	ENSMUSG00000012428	Steap4	ensembl_havana	10	ensembl_havana	28.118	13.4805	45.6275	91.5544	1192.03	151.016	858.854	83.4683	219.75	492.558	177.365	26.3229	3.52518	1.76271	13.0527
13	17869777	17874334	4557	+	ENSMUSG00000012429	protein_coding	ENSMUSG00000012429	Mplkip	ensembl_havana	10	ensembl_havana | havana	589.562	602.967	597.31	566.129	404.083	520.551	495.814	173.505	370.51	329.865	295.512	375.09	581.731	626.807	512.841
19	37364851	37410308	45457	+	ENSMUSG00000012443	protein_coding	ENSMUSG00000012443	Kif11	ensembl_havana	5	ensembl_havana | havana	5288.42	2033.1	4649.77	6112.45	5101.27	4987.85	5420.33	2728.42	4961.78	5472.37	5687.96	4768.07	5738.97	4850.97	5513.47
6	8255936	8259174	3238	-	ENSMUSG00000012483	protein_coding	ENSMUSG00000012483	Rpa3	ensembl_havana	5	ensembl_havana | havana	315.926	251.191	270.9	349.285	192.198	261.042	307.632	98.4312	289.865	278.098	247.899	110.996	521.188	412.152	371.89
8	112038429	112064810	26381	-	ENSMUSG00000012519	protein_coding	ENSMUSG00000012519	Mlkl	ensembl_havana	15	ensembl_havana | havana	871.657	373.776	826.366	927.822	925.481	620.247	755.79	207.324	384.562	351.678	259.226	1086.5	875.126	698.031	730.949
6	29540826	29609887	69061	-	ENSMUSG00000012535	protein_coding	ENSMUSG00000012535	Tnpo3	ensembl_havana	15	ensembl | ensembl_havana | havana	2427.9	2151.37	2399.39	2316.67	2144.83	2223.9	2385.79	812.941	1286.95	1411.42	1324.87	2939.42	3009.18	2836.5	3091.85
12	85871433	86108668	237235	+	ENSMUSG00000012609	protein_coding	ENSMUSG00000012609	Ttll5	ensembl_havana	20	ensembl_havana | havana	274.432	256.129	271.23	323.744	339.345	292.324	268.471	192.964	261.288	300.544	268.776	648.088	541.996	620.475	690.489
7	42945621	42962719	17098	-	ENSMUSG00000012640	protein_coding	ENSMUSG00000012640	Zfp715	ensembl_havana	17	ensembl_havana | havana	921.142	884.811	722.431	1013.7	747.794	950.318	1091.69	301.563	679.347	604.22	597.584	440.228	1007.32	869.017	725.728
10	60138527	60532270	393743	-	ENSMUSG00000012819	protein_coding	ENSMUSG00000012819	Cdh23	ensembl_havana	17	ensembl | ensembl_havana | havana	200.2	183.824	169.836	148.186	157.95	364.596	265.927	78.9807	115.235	149.228	151.442	34.492	28.2014	25.5593	30.6739
7	12656217	12660614	4397	+	ENSMUSG00000012848	protein_coding	ENSMUSG00000012848	Rps5	ensembl_havana	16	ensembl_havana | havana	13733.1	15436.6	14154	16399.4	12224.8	14898.8	15421.9	2711.36	7573.33	6710.04	6016.75	18198	24179.5	18781.8	14482.7
8	84852618	84859157	6539	+	ENSMUSG00000012889	protein_coding	ENSMUSG00000012889	Podnl1	ensembl_havana	9	ensembl_havana | havana	129.343	207.109	52.3871	34.9228	91.3147	50.6983	39.4437	22.4377	41.538	31.3067	27.2869	48.1073	29.964	42.3051	38.5055
8	84626734	84668584	41850	+	ENSMUSG00000013033	protein_coding	ENSMUSG00000013033	Adgrl1	ensembl_havana	17	ensembl_havana | havana	317.165	239.961	277.743	232.462	341.495	282.016	193.036	87.8767	146.053	141.49	139.951	872.026	753.139	901.081	749.972
9	14453262	14556353	103091	-	ENSMUSG00000013076	protein_coding	ENSMUSG00000013076	Amotl1	ensembl_havana	18	ensembl_havana | havana	10.1225	1.2255	17.744	16.0456	23.4457	10.7869	2.54475	34.1053	32.1585	31.3067	53.2094	2.72306	6.16906	4.40678	73.0952
16	22200059	22258470	58411	-	ENSMUSG00000013089	protein_coding	ENSMUSG00000013089	Etv5	ensembl_havana	16	ensembl_havana | havana	148.299	170.661	179.173	134.789	133.474	134.842	122.717	52.0878	101.597	90.565	133.216	148.931	271.177	258.362	221.396
8	106440486	106485297	44811	-	ENSMUSG00000013150	protein_coding	ENSMUSG00000013150	Gfod2	ensembl_havana	16	ensembl_havana | havana	57.3607	53.9218	69.2862	53.8	83.9108	92.767	67.4359	35.9003	68.3368	58.4391	49.1164	117.091	170.09	146.305	90.7164
8	106430283	106434843	4560	-	ENSMUSG00000013155	protein_coding	ENSMUSG00000013155	Enkd1	ensembl_havana	11	ensembl_havana | havana	186.703	158.089	196.874	272.775	169.056	196.321	206.125	83.4683	171.512	145.054	129.613	307.705	392.176	277.627	291.076
8	106251097	106292680	41583	-	ENSMUSG00000013160	protein_coding	ENSMUSG00000013160	Atp6v0d1	ensembl_havana	8	ensembl_havana | havana	2133.59	1778.19	1579.22	1998.15	1995.35	2022.54	3063.88	768.268	1747.28	1575.77	1450.3	924.931	1134.23	1038.24	1044.87
17	56719426	56783484	64058	-	ENSMUSG00000013236	protein_coding	ENSMUSG00000013236	Ptprs	ensembl_havana	18	ensembl_havana | havana	2545.25	2357.85	2937.07	2648.47	878.595	2908.14	1706.26	376.953	572.153	610.48	776.312	5193.73	3501.39	4001.35	3389.14
1	131755231	131776604	21373	+	ENSMUSG00000013275	protein_coding	ENSMUSG00000013275	Slc41a1	ensembl_havana	10	ensembl_havana | havana	376.781	484.071	384.454	324.688	287.518	516.691	402.071	86.1608	119.254	133.575	171.907	383.043	333.13	336.678	291.728
9	121588396	121600809	12413	+	ENSMUSG00000013419	protein_coding	ENSMUSG00000013419	Zfp651	ensembl_havana	8	ensembl_havana | havana	5.6236	20.8334	20.2789	6.60702	78.9749	21.5737	13.9961	11.6676	24.1189	22.9582	20.4652	19.0614	19.3885	28.2034	15.6633
2	25089724	25101502	11778	-	ENSMUSG00000013465	protein_coding	ENSMUSG00000013465	Nelfb	ensembl_havana	20	ensembl_havana | havana	1438.51	1415.44	1398.4	1522.43	1368.49	1328.95	1809.31	457.729	829.418	852.587	960.496	1994.19	1742.32	1478.92	1447.56
5	108777636	108796649	19013	+	ENSMUSG00000013495	protein_coding	ENSMUSG00000013495	Tmem175	ensembl_havana	16	ensembl_havana | havana	279.209	394.691	255.056	428.088	272.273	246.745	406.876	119.715	198.599	203.703	211.685	255.132	346.029	483.383	392.005
2	170188911	170269766	80855	-	ENSMUSG00000013523	protein_coding	ENSMUSG00000013523	Bcas1	ensembl_havana	14	ensembl | ensembl_havana | havana	21.3697	14.706	7.60459	11.3263	20.9777	9.70818	12.7238	16.1551	21.439	12.5227	13.6434	11.7999	7.93165	14.9831	8.48427
16	18118689	18165968	47279	-	ENSMUSG00000013539	protein_coding	ENSMUSG00000013539	Tango2	ensembl_havana	15	ensembl_havana | havana	255.311	317.403	230.672	206.705	178.927	220.052	265.926	119.369	225.109	224.364	278.326	370.336	325.198	358.712	428.129
1	171062422	171078958	16536	-	ENSMUSG00000013593	protein_coding	ENSMUSG00000013593	Ndufs2	ensembl_havana	13	ensembl_havana | havana	2643.13	2133.56	2363.34	2521.05	2134.8	2313.76	2800.46	682.106	1317.15	1160.44	982.328	2627.78	3005.2	2392.04	2231.32
5	31205656	31211968	6312	+	ENSMUSG00000013622	protein_coding	ENSMUSG00000013622	Atraid	ensembl_havana	16	ensembl_havana | havana	592.726	654.118	623.517	689.69	488.596	608.805	606.524	126.251	265.307	240.018	190.999	310.573	426.932	333.152	328.929
5	31212124	31235824	23700	+	ENSMUSG00000013629	protein_coding	ENSMUSG00000013629	Cad	ensembl_havana	17	ensembl_havana | havana	1607.22	1169.12	1753.29	2135.94	1694.26	1375.33	2164.3	548.377	920.536	1296.1	1178.79	8327.35	7764.75	7253.49	6985.75
11	58221550	58238555	17005	+	ENSMUSG00000013646	protein_coding	ENSMUSG00000013646	Sh3bp5l	ensembl_havana	18	ensembl | havana	592.726	669.119	637.094	694.678	609.588	615.929	829.591	280.92	544.014	518.648	484.342	775.164	628.364	513.831	496.656
19	32649038	32717187	68149	-	ENSMUSG00000013662	protein_coding	ENSMUSG00000013662	Atad1	ensembl_havana	7	ensembl_havana | havana	1276.56	1284.32	1290.25	1731.98	1459.79	1437.89	1469.6	499.912	972.793	920.417	893.649	949.438	1968.81	1746.85	1543.48
19	32734897	32803561	68664	+	ENSMUSG00000013663	protein_coding	ENSMUSG00000013663	Pten	ensembl_havana	8	ensembl_havana | havana	6721.68	6675.08	5456.04	8868.15	8960.47	8791.5	12306.8	3507.66	7686.83	6937.45	7194.17	2920.76	4972.88	4598.57	4337.35
1	172024295	172034372	10077	-	ENSMUSG00000013698	protein_coding	ENSMUSG00000013698	Pea15a	ensembl_havana	13	ensembl_havana | havana	647.836	1454.66	573.727	584.249	365.259	663.393	526.763	146.294	284.067	241.061	257.861	235.998	185.953	201.831	255.181
14	31902119	31923856	21737	-	ENSMUSG00000013701	protein_coding	ENSMUSG00000013701	Timm23	ensembl_havana	14	ensembl_havana | havana	1232.49	636.69	1394.76	880.121	1114.7	685.775	849.572	300.819	470.346	501.142	480.491	1809.87	1557.03	1122.34	1558.62
3	95046832	95049672	2840	-	ENSMUSG00000013707	protein_coding	ENSMUSG00000013707	Tnfaip8l2	ensembl_havana	4	ensembl_havana	2712.82	2273.29	2274.62	2145.39	1625.16	2496.08	3001.53	551.07	1250.16	955.897	858.173	465.643	552.572	419.526	402.676
6	106746081	106759436	13355	+	ENSMUSG00000013736	protein_coding	ENSMUSG00000013736	Trnt1	ensembl_havana	17	ensembl_havana | havana	770.198	708.883	798.463	866.443	808.781	694.707	770.815	312.267	582.202	563.908	587.378	1148.39	1460.8	1241.24	1212.73
17	35117445	35133029	15584	+	ENSMUSG00000013787	protein_coding	ENSMUSG00000013787	Ehmt2	ensembl_havana	16	ensembl_havana | havana	3364.05	3080.89	3304.6	3926.46	2546.94	3458.27	3384.52	705.441	1443.11	1420.28	1174.7	5164.77	4545.74	3972.26	2983.2
9	22024285	22028469	4184	-	ENSMUSG00000013822	protein_coding	ENSMUSG00000013822	Elof1	ensembl_havana	8	ensembl_havana | havana	862.665	585.785	926.07	847.589	762.602	771.261	900.84	340.156	777.165	637.612	626.235	639.011	962.377	800.271	702.238
10	79730542	79744758	14216	-	ENSMUSG00000013833	protein_coding	ENSMUSG00000013833	Med16	ensembl_havana	16	ensembl_havana | havana	800.802	737.749	1180.4	854.192	637.969	711.934	1075.16	175.912	380.543	395.509	357.458	1326.13	831.943	750.036	676.132
15	66974724	67048680	73956	-	ENSMUSG00000013846	protein_coding	ENSMUSG00000013846	St3gal1	ensembl_havana	11	ensembl | havana	1606.11	2031.87	1373.05	1075.05	884.766	1582.44	1552.3	390.416	825.402	809.798	1102.39	1618.41	653.919	1063.79	1312.45
10	79810782	79820165	9383	-	ENSMUSG00000013858	protein_coding	ENSMUSG00000013858	Tmem259	ensembl_havana	15	ensembl_havana | havana	1748.58	1823.48	2232.82	1627.2	1663.25	1674.91	1930.19	545.686	785.121	750.318	852.559	2026.74	1592.5	1540.55	1271.25
8	26609396	26641819	32423	+	ENSMUSG00000013878	protein_coding	ENSMUSG00000013878	Rnf170	ensembl_havana	19	ensembl_havana | havana	369.153	492.774	375.123	519.028	447.419	432.926	418.007	155.134	250.762	272.753	216.576	326.112	427.669	413.192	426.95
7	29979519	29989663	10144	+	ENSMUSG00000013928	protein_coding	ENSMUSG00000013928	1700020L13Rik	ensembl_havana	14	ensembl | havana	17.5758	7.07736	36.2726	11.1898	37.8419	4.75457	12.5133	20.7222	10.7195	6.33373	10.4493	60.1124	11.1583	17.562	22.7203
1	171156713	171169900	13187	+	ENSMUSG00000013973	protein_coding	ENSMUSG00000013973	Dedd	ensembl_havana	13	ensembl_havana | havana	425.833	328.164	401.164	381.157	391.336	428.129	489.403	161.872	318.912	246.097	265.904	350.084	411.687	360.118	388.856
8	3715754	3719260	3506	+	ENSMUSG00000013974	protein_coding	ENSMUSG00000013974	Mcemp1	ensembl_havana	4	ensembl_havana	3203.2	3294.13	2337.14	3124.18	4837.21	3597.42	6352.97	1911.69	4380.25	3613.83	2921.06	244.167	43.1834	80.2034	83.5374
1	171165576	171173215	7639	-	ENSMUSG00000013997	protein_coding	ENSMUSG00000013997	Nit1	ensembl_havana	11	ensembl_havana | havana	578.541	610.565	485.193	535.33	594.616	571.814	536.132	172.899	333.636	322.64	308.485	351.558	606.208	437.511	477.191
16	97592667	97653051	60384	-	ENSMUSG00000014039	protein_coding	ENSMUSG00000014039	Prdm15	ensembl_havana	19	ensembl | havana	422.895	345.59	377.695	408.692	394.874	569.547	396.981	177.707	325.604	210.798	301.52	633.565	629.242	611.662	626.532
16	32096277	32120253	23976	+	ENSMUSG00000014074	protein_coding	ENSMUSG00000014074	Rnf168	ensembl_havana	18	ensembl | havana	934.645	716.917	1148.29	1441.27	844.045	1071.13	997.544	508.889	794.579	798.321	942.764	1205.41	1766.1	1532.68	1487.33
16	32238520	32247918	9398	+	ENSMUSG00000014075	protein_coding	ENSMUSG00000014075	Dynlt2b	ensembl_havana	16	ensembl_havana | havana	300.3	251.227	233.207	322.8	223.351	288.009	234.117	78.9807	167.492	162.795	90.0467	118.907	159.514	156.881	161.201
2	119378178	119417509	39331	+	ENSMUSG00000014077	protein_coding	ENSMUSG00000014077	Chp1	ensembl_havana	14	ensembl_havana | havana	2191.45	2122.27	1986.94	2613.35	2875.44	3037.95	4685.71	1199.54	3145.35	2785.07	2684.64	902.84	1378.42	1174.75	1040.36
5	114760213	114796483	36270	-	ENSMUSG00000014158	protein_coding	ENSMUSG00000014158	Trpv4	ensembl_havana	13	ensembl_havana | havana	23.6191	29.4119	41.4027	36.8105	51.8273	20.495	36.8989	13.4626	5.35974	22.9582	5.45738	15.4307	12.3381	12.339	11.0948
13	58148042	58261407	113365	-	ENSMUSG00000014164	protein_coding	ENSMUSG00000014164	Klhl3	ensembl_havana	16	ensembl_havana | havana	23.6191	34.3139	57.4569	74.565	40.7214	25.8885	50.8951	35.9003	20.099	41.7422	23.1939	261.414	141.007	170.983	157.286
11	62770281	62807607	37326	+	ENSMUSG00000014177	protein_coding	ENSMUSG00000014177	Tvp23b	ensembl_havana	11	ensembl_havana | havana	298.051	341.913	228.982	317.137	294.922	297.718	226.483	94.2384	245.208	178.448	170.543	241.444	506.744	444.204	402.676
11	100473644	100511015	37371	-	ENSMUSG00000014195	protein_coding	ENSMUSG00000014195	Dnajc7	ensembl_havana	17	ensembl_havana | havana	3889.6	2620.99	3925.02	2473.54	2668.77	2844.02	2121.78	1325.16	1646.52	1549.15	1536.23	3626.06	2028.21	1823.53	2366.05
11	100518369	100583282	64913	-	ENSMUSG00000014198	protein_coding	ENSMUSG00000014198	Zfp385c	ensembl_havana	16	ensembl_havana | havana	41.6146	46.5688	43.9376	27.3719	6.16991	28.0459	24.1751	11.6676	5.35975	4.17422	10.9148	6.3538	4.40647	2.64407	3.26318
1	160029937	160040446	10509	-	ENSMUSG00000014226	protein_coding	ENSMUSG00000014226	Cacybp	ensembl_havana	11	ensembl_havana | havana	1268.73	836.917	1104.59	1289.87	1418.48	1380.14	1331.61	456.412	959.186	936.696	1219.45	1572.06	3854.75	2571.95	2608.35
16	3726665	3759012	32347	+	ENSMUSG00000014232	protein_coding	ENSMUSG00000014232	Cluap1	ensembl_havana	15	ensembl_havana | havana	337.432	266.958	332.953	305.586	258.804	246.653	251.022	88.4434	153.936	143.173	131.604	468.037	495.659	397.299	422.865
11	62158050	62172202	14152	-	ENSMUSG00000014243	protein_coding	ENSMUSG00000014243	Zswim7	ensembl_havana	6	ensembl_havana	50.6124	53.9218	92.1	40.586	49.3593	49.6196	64.8912	8.07757	28.1387	14.6098	19.1008	61.7226	74.0288	46.7119	43.074
11	62349286	62405244	55958	+	ENSMUSG00000014245	protein_coding	ENSMUSG00000014245	Pigl	ensembl_havana	9	ensembl_havana | havana	53.9865	109.069	89.5651	85.8912	93.7827	98.1605	76.3426	38.5929	71.0166	44.8729	60.0312	169.737	102.23	114.576	119.432
18	36875385	36877611	2226	-	ENSMUSG00000014294	protein_coding	ENSMUSG00000014294	Ndufa2	ensembl_havana	5	ensembl_havana	950.388	969.367	1261.52	893.835	908.211	885.602	1128.6	182.194	552.054	464.382	500.714	1070.16	1142.16	781.763	681.352
16	4434328	4442853	8525	-	ENSMUSG00000014301	protein_coding	ENSMUSG00000014301	Pam16	ensembl_havana	14	ensembl_havana | havana	33.6345	42.9546	48.7884	44.9633	33.6495	71.9307	38.5309	16.4594	16.5675	30.0529	27.3766	54.8647	66.0169	60.2919	68.1142
16	4412577	4442789	30212	+	ENSMUSG00000014303	protein_coding	ENSMUSG00000014303	Glis2	ensembl_havana	14	ensembl_havana | havana	74.665	62.5003	110.319	51.9123	14.8078	90.1074	54.7122	9.87259	20.099	32.3502	24.5582	93.3972	53.8303	65.2203	78.1553
15	35926032	35938393	12361	-	ENSMUSG00000014313	protein_coding	ENSMUSG00000014313	Cox6c	ensembl_havana	16	ensembl_havana | havana	2936.47	1838.48	3071.72	1921.76	2389.5	1796.51	2058.31	870.391	1359.43	1211.75	1159.39	3034.82	2713.11	1985.51	2624.25
11	95938258	95956215	17957	-	ENSMUSG00000014349	protein_coding	ENSMUSG00000014349	Ube2z	ensembl_havana	8	ensembl_havana	1806.3	1824.76	2050.7	1662.14	1896.63	1646.08	2009.08	612.998	1250.16	1136.43	1140.59	1892.52	1639.21	1433.97	1377.71
2	128660038	128696182	36144	+	ENSMUSG00000014353	protein_coding	ENSMUSG00000014353	Tmem87b	ensembl_havana	16	ensembl_havana | havana	448.763	537.993	428.391	460.603	435.596	608.379	446.604	151.679	297.466	257.758	279.691	288.644	423.022	384.271	401.371
2	128452024	128529312	77288	-	ENSMUSG00000014355	protein_coding	ENSMUSG00000014355	Anapc1	ensembl_havana	11	ensembl_havana | havana	3490.01	2660.55	3221.83	3929.22	3018.32	3295.41	3781.47	1192.79	2224.31	2510.8	2511.74	5011.35	6120.61	5544.64	6312.94
7	46538697	46569718	31021	-	ENSMUSG00000014402	protein_coding	ENSMUSG00000014402	Tsg101	ensembl_havana	16	ensembl_havana | havana	544.18	587.217	517.195	660.282	458.605	606.364	686.016	196.697	468.46	419.658	371.885	500.451	567.106	570.732	565.215
7	46409890	46445489	35599	-	ENSMUSG00000014418	protein_coding	ENSMUSG00000014418	Hps5	ensembl_havana	17	ensembl_havana | havana	1913.14	1982.85	1611.32	1721.6	1046.42	1957.82	1436.51	305.153	527.935	476.905	559.381	875.008	812.553	794.102	789.036
17	12446508	12537684	91176	-	ENSMUSG00000014426	protein_coding	ENSMUSG00000014426	Map3k4	ensembl_havana	10	ensembl_havana | havana	1114.59	1053.81	940.078	1171.18	978.361	1142.04	961.918	323.752	534.158	539.52	559.172	1526.52	1312.82	1203.6	1343.81
8	123208437	123278069	69632	-	ENSMUSG00000014444	protein_coding	ENSMUSG00000014444	Piezo1	ensembl_havana	18	ensembl | havana	2669.86	2753.38	2276.87	2845.67	2033.55	2896.91	2794.31	600.322	983.752	1174.15	1313.94	5344.54	3229.38	3301.04	3852.16
14	63610285	63654487	44202	-	ENSMUSG00000014453	protein_coding	ENSMUSG00000014453	Blk	ensembl_havana	5	ensembl_havana | havana	194.576	569.856	230.672	17.9333	28.3816	76.5867	29.2646	166.937	345.704	293.239	403.846	12.7076	32.6079	7.93221	33.9371
8	123192886	123202804	9918	-	ENSMUSG00000014470	protein_coding	ENSMUSG00000014470	Rnf166	ensembl_havana	5	ensembl_havana | havana	1323.8	1593.15	1394.18	1535.66	1268.53	1445.44	1463.23	464.012	924.556	704.4	663.071	732.502	728.83	717.423	563.224
14	31420725	31552609	131884	-	ENSMUSG00000014496	protein_coding	ENSMUSG00000014496	Ankrd28	ensembl_havana	9	ensembl_havana | havana	1761.31	2300.26	2653.97	3669.75	2976.32	1898.49	3166.97	1289.72	2529.78	2283.29	2157.02	3705.19	3658.24	4310.66	3823.24
10	128212984	128244574	31590	+	ENSMUSG00000014498	protein_coding	ENSMUSG00000014498	Ankrd52	ensembl_havana	10	ensembl_havana | havana	1873.78	1537.88	2159.63	1567.58	1364.61	1746.3	1966.2	351.823	645.85	723.184	907.291	4481.57	1498.93	2132.38	2666.82
18	34541542	34577170	35628	+	ENSMUSG00000014503	protein_coding	ENSMUSG00000014503	Pkd2l2	ensembl_havana	16	ensembl_havana | havana	60.6344	101.68	65.3314	63.1082	22.1863	72.7094	67.0243	56.5648	99.5216	79.6029	111.862	47.3208	51.8255	79.1003	59.2041
18	34463900	34469653	5753	+	ENSMUSG00000014504	protein_coding	ENSMUSG00000014504	Srp19	ensembl_havana	17	ensembl_havana | havana	508.373	500.003	372.625	589.914	628.096	449.812	502.589	223.48	401.981	419.509	365.644	499.228	842.516	613.425	561.918
14	63075127	63198959	123832	+	ENSMUSG00000014547	protein_coding	ENSMUSG00000014547	Wdfy2	ensembl_havana	11	ensembl_havana | havana	2333.79	2571.09	1931.57	3547.97	3059.04	3513.28	3474.86	980.977	2039.38	1651.95	1901.9	1299.81	1368.65	1290.31	1210.64
6	92163693	92191907	28214	-	ENSMUSG00000014550	protein_coding	ENSMUSG00000014550	Rbsn	ensembl_havana	15	ensembl_havana | havana	738.941	789.219	662.444	894.779	829.236	755.081	898.297	307.845	487.737	565.607	497.986	858.67	898.921	839.933	892.153
6	92146506	92161015	14509	-	ENSMUSG00000014551	protein_coding	ENSMUSG00000014551	Mrps25	ensembl_havana	9	ensembl_havana | havana	863.24	769.184	665.75	707.375	899.587	897.879	680.691	317.739	528.335	540.426	529.967	1161.11	1328.16	1214.81	1337.8
6	83457199	83483952	26753	-	ENSMUSG00000014554	protein_coding	ENSMUSG00000014554	Dguok	ensembl_havana	14	ensembl_havana | havana	517.371	541.669	353.191	465.323	350.451	465.992	366.444	159.756	239.849	212.885	236.032	268.675	433.596	379.865	354.381
4	151001779	151946334	944555	-	ENSMUSG00000014592	protein_coding	ENSMUSG00000014592	Camta1	ensembl_havana	22	ensembl | havana	115.846	149.511	127.588	135.916	83.9108	104.633	108.152	54.748	89.7757	86.6151	85.9537	87.1378	138.363	177.153	161.201
3	107648364	107667786	19422	-	ENSMUSG00000014599	protein_coding	ENSMUSG00000014599	Csf1	ensembl_havana	11	ensembl_havana | havana	195.701	169.118	148.712	217.087	356.62	175.826	134.872	166.039	293.446	255.671	312.435	1102.84	511.149	765.022	615.433
3	107519848	107539011	19163	-	ENSMUSG00000014601	protein_coding	ENSMUSG00000014601	Strip1	ensembl_havana	14	ensembl_havana | havana	1004.37	970.594	1149.98	1012.76	998.291	743.214	1182.04	317.718	777.164	634.48	604.404	1009.35	781.709	798.511	770.759
11	70535022	70538306	3284	-	ENSMUSG00000014606	protein_coding	ENSMUSG00000014606	Slc25a11	ensembl_havana	15	ensembl_havana | havana	1787.47	2019.63	1465.15	2039.76	1461.04	1716.26	2418.97	568.169	1441.78	1124.99	970.049	1005.78	1438.27	1305.64	1094.47
8	117615424	117648195	32771	-	ENSMUSG00000014633	protein_coding	ENSMUSG00000014633	Cmc2	ensembl_havana	16	ensembl_havana | havana	268.808	199.756	272.92	272.775	224.585	273.986	329.545	112.189	293.446	276.542	261.954	321.321	357.806	306.712	306.739
5	110283708	110319839	36131	+	ENSMUSG00000014668	protein_coding	ENSMUSG00000014668	Chfr	ensembl_havana	16	ensembl_havana | havana	1929.45	1574.53	1491.55	1694	1674.96	1676.08	2084.24	582.713	1248.02	1115.41	1001.07	1191.05	1056.27	1025.78	1077.34
6	83745867	83752796	6929	-	ENSMUSG00000014748	protein_coding	ENSMUSG00000014748	Tex261	ensembl_havana	14	ensembl_havana | havana	1887.27	1803.93	2294.07	2257.72	1689.32	2081.86	2338.62	493.629	1100.09	912.066	884.095	1567.58	1775.81	1622.56	1491.92
17	15616464	15653846	37382	+	ENSMUSG00000014763	protein_coding	ENSMUSG00000014763	Fam120b	ensembl_havana	9	ensembl_havana | havana	1031.37	1008.58	806.928	955.187	1038.9	1002.1	937.744	402.084	564.114	505.08	560.745	648.995	791.333	703.319	767.496
17	15720150	15748642	28492	+	ENSMUSG00000014767	protein_coding	ENSMUSG00000014767	Tbp	ensembl_havana	18	ensembl_havana | havana	742.801	763.46	699.091	809.756	745.286	836.581	742.175	314.333	468.809	511.278	533.336	550.634	1084.09	991.528	890.033
17	15695283	15720014	24731	-	ENSMUSG00000014769	protein_coding	ENSMUSG00000014769	Psmb1	ensembl_havana	11	ensembl_havana | havana	3905	2580.92	3481.21	2654.17	3207.11	2748.48	3119.83	943.283	1957.64	1788.65	1607.19	2693.98	3160.34	2368.2	2888.55
17	15739470	15747564	8094	-	ENSMUSG00000014771	protein_coding	ENSMUSG00000014771	Pdcd2	ensembl_havana	14	ensembl_havana | havana	390.917	227.967	399.349	317.213	381.34	305.749	278.27	87.7502	178.38	182.687	177.487	475.049	516.347	359.593	480.503
8	106055795	106074586	18791	-	ENSMUSG00000014778	protein_coding	ENSMUSG00000014778	Fhod1	ensembl_havana	11	ensembl_havana | havana	597.226	545.346	699.624	588.968	399.811	744.29	842.31	116.676	302.826	293.239	326.078	574.567	308.454	406.305	276.718
8	106075475	106096514	21039	+	ENSMUSG00000014786	protein_coding	ENSMUSG00000014786	Slc9a5	ensembl_havana	9	ensembl_havana | havana	67.4831	40.4414	114.069	67.9579	57.9972	63.6425	31.8094	17.9502	29.4786	19.8276	30.0156	79.8763	65.2158	65.2204	59.3899
8	106032233	106037393	5160	+	ENSMUSG00000014791	protein_coding	ENSMUSG00000014791	Elmo3	ensembl_havana	11	ensembl_havana | havana	74.2315	93.1377	59.9917	68.9018	69.103	64.7212	52.1674	57.4405	97.8153	97.0507	110.512	88.0455	63.4532	81.9662	78.9689
8	106007041	106016497	9456	-	ENSMUSG00000014837	protein_coding	ENSMUSG00000014837	4931428F04Rik	ensembl_havana	16	ensembl | ensembl_havana | havana	61.905	23.3965	77.5153	41.9448	15.8284	38.4927	31.0763	7.27078	30.4443	17.8376	25.014	185.168	55.2175	70.3251	107.514
8	106194125	106198159	4034	-	ENSMUSG00000014846	protein_coding	ENSMUSG00000014846	Tppp3	ensembl_havana	13	ensembl_havana | havana	416.146	2431.36	237.432	285.989	109.824	524.242	243.024	17.9502	45.5578	58.4391	34.1086	12.7076	7.05036	9.69492	9.78954
13	92348380	92491512	143132	-	ENSMUSG00000014850	protein_coding	ENSMUSG00000014850	Msh3	ensembl_havana	16	ensembl_havana | havana	781.858	490.27	748.47	793.548	651.373	661.775	622.965	319.513	416.411	432.032	447.505	930.64	894.944	908.08	1032.42
8	106052986	106061852	8866	+	ENSMUSG00000014856	protein_coding	ENSMUSG00000014856	Tmem208	ensembl_havana	13	ensembl_havana | havana	510.622	547.797	599.072	562.54	381.301	488.645	626.009	126.549	318.905	305.762	272.869	383.043	704.154	543.797	464.677
8	106024295	106032003	7708	+	ENSMUSG00000014859	protein_coding	ENSMUSG00000014859	E2f4	ensembl_havana	10	ensembl_havana | havana	951.512	748.778	967.473	912.714	890.935	868.342	1126.05	675.825	1086.69	1417.15	1454.39	2391.75	1880.67	1537.97	1758.2
2	26810052	26823941	13889	-	ENSMUSG00000014867	protein_coding	ENSMUSG00000014867	Surf4	ensembl_havana	10	ensembl_havana | havana	5994.78	5061.21	5154.07	6094.66	6838.4	5330.76	7023.02	1566.15	3671.45	3558.04	2766.58	4192.11	5410.13	4455.35	4561.11
2	26806379	26810196	3817	+	ENSMUSG00000014873	protein_coding	ENSMUSG00000014873	Surf2	ensembl_havana	16	ensembl_havana | havana	316.046	294.209	253.641	353.813	348.398	353.919	280.772	140.909	140.682	176.847	168.13	571.427	634.676	674.176	573.887
12	44252342	44257110	4768	-	ENSMUSG00000014905	protein_coding	ENSMUSG00000014905	Dnajb9	ensembl_havana	5	ensembl_havana | havana	489.253	495.1	522.182	570.091	557.606	843.523	438.97	183.092	479.697	315.142	466.606	402.105	698.867	646.916	427.473
8	67312869	67343217	30348	+	ENSMUSG00000014907	protein_coding	ENSMUSG00000014907	Naf1	ensembl_havana	11	ensembl_havana | havana	205.824	104.793	271.936	201.918	161.57	126.206	170.498	50.2605	103.175	119.681	115.969	445.72	479.71	487.987	473.883
5	32768515	32844402	75887	+	ENSMUSG00000014932	protein_coding	ENSMUSG00000014932	Yes1	ensembl_havana	16	ensembl_havana | havana	32.6169	26.9609	12.6743	23.5965	50.3268	35.5967	34.3542	40.5653	53.5974	22.9582	28.6512	17.246	14.1007	19.3898	18.2738
5	32616187	32674778	58591	+	ENSMUSG00000014956	protein_coding	ENSMUSG00000014956	Ppp1cb	ensembl_havana	16	ensembl_havana | havana	3840.84	6380.54	4378.65	6101.84	5432.3	5003.43	7353.72	4433.54	10058.4	9438.26	11061.6	3499.68	5377.88	4757.72	4126.93
2	70491920	70542981	51061	+	ENSMUSG00000014959	protein_coding	ENSMUSG00000014959	Gorasp2	ensembl_havana	13	ensembl_havana | havana	2056.34	1424.01	1613.97	1962.45	2137.06	1616.24	1921.29	495.444	863.314	965.342	728.65	1934.22	2253.72	1773.52	1964.45
1	152246486	152262440	15954	-	ENSMUSG00000014980	protein_coding	ENSMUSG00000014980	Tsen15	ensembl_havana	15	ensembl_havana | havana	133.847	113.971	136.367	155.196	136.731	152.285	133.192	88.5798	128.676	107.486	88.6824	258.736	399.13	392.614	438.506
15	65658883	65745666	86783	+	ENSMUSG00000015002	protein_coding	ENSMUSG00000015002	Efr3a	ensembl_havana	19	ensembl_havana | havana	2241.56	2363.99	1622.31	2564.47	1669.58	2309.46	1986.18	478.372	1046.49	987.201	1118.76	1320.68	1948.54	1839.4	1717.08
8	123338379	123343400	5021	+	ENSMUSG00000015013	protein_coding	ENSMUSG00000015013	Trappc2l	ensembl_havana	10	ensembl_havana | havana	444.264	394.609	283.06	424.737	410.916	456.285	550.939	139.114	250.568	264.02	212.838	184.26	273.201	233.559	259.096
8	123502225	123544620	42395	+	ENSMUSG00000015016	protein_coding	ENSMUSG00000015016	Acsf3	ensembl_havana	9	ensembl | havana	253.062	270.834	270.385	251.067	193.735	176.905	221.393	76.2882	125.954	112.704	106.419	584.547	304.047	318.169	392.233
8	111701628	111724433	22805	-	ENSMUSG00000015023	protein_coding	ENSMUSG00000015023	Ddx19a	ensembl_havana	8	ensembl_havana | havana	877.523	662.954	966.811	739.838	753.334	795.449	977.955	296.052	575.538	533.135	653.142	2221.61	1413.79	1139.59	1378.26
8	123304981	123338203	33222	-	ENSMUSG00000015027	protein_coding	ENSMUSG00000015027	Galns	ensembl_havana	12	ensembl_havana | havana	1444.14	1264.71	1192.24	1445.06	1705.35	1303.05	2042.14	625.562	1077.3	1085.3	889.556	902.239	661.855	618.711	775.981
6	88170873	88184015	13142	+	ENSMUSG00000015053	protein_coding	ENSMUSG00000015053	Gata2	ensembl_havana	15	ensembl_havana | havana	83.2293	44.1178	136.883	194.435	162.886	52.8557	38.1713	192.067	282.727	308.893	294.699	3803.15	2616.59	3623.18	2439.52
2	25388663	25391732	3069	-	ENSMUSG00000015083	protein_coding	ENSMUSG00000015083	C8g	ensembl_havana	12	ensembl_havana | havana	19.1202	24.5099	11.8294	21.7088	9.87186	16.1803	15.2685	6.28256	2.67987	4.17422	15.0078	26.3229	18.5072	19.3898	18.2738
2	25473030	25498534	25504	-	ENSMUSG00000015087	protein_coding	ENSMUSG00000015087	Rabl6	ensembl_havana	15	ensembl_havana | havana	1308.05	1327.21	1346.01	1371.43	1148.83	1147.72	1122.23	393.108	619.052	679.354	611.226	2559.67	2028.75	1773.29	1839.78
2	25447859	25452095	4236	+	ENSMUSG00000015092	protein_coding	ENSMUSG00000015092	Edf1	ensembl_havana	10	ensembl_havana | havana	1476.48	1458.48	1171.23	1312.77	1713.49	1207.58	1638.58	495.945	1015.43	858.598	810.733	1778.91	1521.1	1068	1199.68
2	25346850	25348789	1939	+	ENSMUSG00000015093	protein_coding	ENSMUSG00000015093	Clic3	ensembl_havana	16	ensembl_havana | havana	8.99775	13.4805	22.8138	10.3825	9.87186	29.1245	26.7199	5.38505	13.3994	9.392	4.09303	7.26148	8.81295	14.9831	4.56845
2	25390762	25395484	4722	+	ENSMUSG00000015095	protein_coding	ENSMUSG00000015095	Fbxw5	ensembl_havana	13	ensembl_havana | havana	819.92	928.925	803.551	858.912	697.2	747.53	919.927	183.989	430.12	440.38	377.924	1039.3	1006.44	961.557	796.216
6	6041218	6217174	175956	-	ENSMUSG00000015112	protein_coding	ENSMUSG00000015112	Slc25a13	ensembl_havana	16	ensembl | ensembl_havana | havana	401.524	297.796	454.586	582.364	392.406	515.612	522.945	116.676	188.931	225.408	221.024	515.566	905.972	654.845	719.205
17	25480890	25493597	12707	-	ENSMUSG00000015120	protein_coding	ENSMUSG00000015120	Ube2i	ensembl_havana	16	ensembl_havana | havana	2053.06	2278.22	1876.3	2381.64	2024.98	2219.05	1998.93	821.236	1480.45	1441.63	1570.94	2958.58	2936.27	2963.03	2400.83
17	25459144	25461773	2629	+	ENSMUSG00000015126	protein_coding	ENSMUSG00000015126	Tsr3	ensembl	10	ensembl	237.009	177.182	227.063	193.491	221.904	145.243	204.872	66.4156	78.0774	107.436	59.5602	288.806	233.44	208.351	215.477
17	25407371	25453418	46047	+	ENSMUSG00000015127	protein_coding	ENSMUSG00000015127	Unkl	ensembl_havana	15	ensembl_havana | havana	380.695	531.628	383.61	360.115	477.653	432.256	434.987	223.219	425.003	401.322	518.421	502.126	385.895	399.929	356.749
7	65876660	66038099	161439	-	ENSMUSG00000015133	protein_coding	ENSMUSG00000015133	Lrrk1	ensembl_havana	18	ensembl_havana | havana	1909.77	2164.22	1820.88	1598.89	1203.13	2206.98	1739.33	245.917	452.898	462.295	532.094	1347.91	933.29	1008.28	1096.43
12	80214321	80307146	92825	-	ENSMUSG00000015143	protein_coding	ENSMUSG00000015143	Actn1	ensembl_havana	16	ensembl_havana | havana	1752.31	2589.23	1479.52	2586.13	3696.86	2651.15	6135.41	2105.43	4064.02	3719.18	3528.08	576.38	289.946	275.864	304.78
7	28466160	28488087	21927	+	ENSMUSG00000015149	protein_coding	ENSMUSG00000015149	Sirt2	ensembl_havana	15	ensembl_havana | havana	889.651	859.073	694.551	706.952	895.871	856.477	989.906	298.87	550.713	493.602	450.234	809.656	638.058	638.981	648.72
7	28507966	28521692	13726	+	ENSMUSG00000015165	protein_coding	ENSMUSG00000015165	Hnrnpl	ensembl_havana	17	ensembl | havana	5236.16	5196.09	6442.63	6561.28	4550.47	5548.28	6409.91	1670.08	3354.86	3632.48	3767.78	7960.96	8692.62	6939.71	5806.93
19	46064302	46073970	9668	+	ENSMUSG00000015176	protein_coding	ENSMUSG00000015176	Nolc1	ensembl_havana	12	ensembl | ensembl_havana | havana	1025.74	845.593	985.217	1660.24	1709.07	1008.57	1146.41	547.479	714.186	994.508	706.731	5851.75	5269.28	3878.84	4218.57
6	4600839	4643356	42517	+	ENSMUSG00000015189	protein_coding	ENSMUSG00000015189	Casd1	ensembl_havana	13	ensembl_havana | havana	656.836	627.454	429.237	1028.81	647.841	941.694	982.274	329.386	753.044	716.923	633.056	536.442	1027.59	1049.69	904.553
10	7069063	7162238	93175	-	ENSMUSG00000015202	protein_coding	ENSMUSG00000015202	Cnksr3	ensembl_havana	14	ensembl_havana | havana	238.44	162.991	335.447	285.99	133.27	240.547	221.393	56.543	97.8154	76.1795	79.132	407.551	301.403	290.848	304.128
X	70408366	70462803	54437	+	ENSMUSG00000015214	protein_coding	ENSMUSG00000015214	Mtmr1	ensembl_havana	15	ensembl | havana	1249.56	1410.55	1278.41	1532.83	1167.35	1281.48	1357.62	451.448	834.782	856.76	706.732	790.594	1193.27	1166.04	1102.29
X	70599524	70604283	4759	+	ENSMUSG00000015217	protein_coding	ENSMUSG00000015217	Hmgb3	ensembl_havana	12	ensembl_havana | havana	397.397	253.363	653.246	539.523	685.284	407.338	412.024	528.676	914.792	1057.61	918.339	1994.27	2699.74	1988.19	1988.64
4	96456666	96479816	23150	-	ENSMUSG00000015224	protein_coding	ENSMUSG00000015224	Cyp2j9	ensembl_havana	11	ensembl_havana | havana	22.4944	23.2844	43.9376	41.5298	13.5738	33.4393	10.179	15.2576	10.7195	16.6969	12.2791	113.461	74.0288	91.661	75.7058
4	53030787	53159896	129109	-	ENSMUSG00000015243	protein_coding	ENSMUSG00000015243	Abca1	ensembl_havana	5	ensembl_havana | havana	419.52	725.494	882.132	514.403	836.64	615.93	422.429	235.147	352.403	399.682	440.683	444.766	390.414	438.916	475.772
4	53011880	53022061	10181	+	ENSMUSG00000015247	protein_coding	ENSMUSG00000015247	Nipsnap3b	ensembl_havana	11	ensembl_havana | havana	511.747	584.562	379.384	715.445	526.91	596.515	744.34	152.576	443.519	430.988	341.086	245.075	661.851	564.949	431.392
X	73394882	73397225	2343	-	ENSMUSG00000015289	protein_coding	ENSMUSG00000015289	Lage3	ensembl_havana	5	ensembl_havana | havana	350.912	323.531	372.624	429.452	276.412	322.528	395.71	103.213	246.548	221.234	188.28	353.09	667.141	506.78	446.402
X	73409324	73416825	7501	-	ENSMUSG00000015290	protein_coding	ENSMUSG00000015290	Ubl4a	ensembl_havana	16	ensembl | ensembl_havana | havana	598.906	528.208	734.269	667.308	559.701	494.509	703.896	213.464	404.73	416.494	365.924	888.132	934.764	793.224	753.771
X	73348604	73355469	6865	+	ENSMUSG00000015291	protein_coding	ENSMUSG00000015291	Gdi1	ensembl_havana	11	ensembl_havana | havana	2197.71	2772.08	1945.09	2479.53	2134.78	2670.83	2783.97	998.928	2134.52	2121.55	2158.41	1040.2	1132.46	1371.39	940.45
10	8597983	8761815	163832	-	ENSMUSG00000015305	protein_coding	ENSMUSG00000015305	Sash1	ensembl_havana	7	ensembl_havana | havana	385.394	252.422	525.191	500.246	201.85	546.854	217.576	86.0336	172.852	128.158	154.171	335.777	220.324	183.322	200.853
10	80765907	80768039	2132	+	ENSMUSG00000015312	protein_coding	ENSMUSG00000015312	Gadd45b	ensembl_havana	10	ensembl_havana | havana	482.505	515.934	605.832	376.6	509.635	458.442	505.133	159.757	246.548	256.715	196.466	223.291	122.5	113.695	135.748
1	171745082	171780738	35656	+	ENSMUSG00000015314	protein_coding	ENSMUSG00000015314	Slamf6	ensembl_havana	11	ensembl_havana | havana	281.18	325.982	148.712	80.2281	844.044	153.174	124.693	204.632	281.387	277.586	403.846	26.3229	19.3885	18.5085	37.8529
1	171594695	171628753	34058	+	ENSMUSG00000015316	protein_coding	ENSMUSG00000015316	Slamf1	ensembl_havana	12	ensembl_havana | havana	24.7438	87.0102	20.2789	16.0456	56.7632	14.0229	12.7238	27.8228	58.9572	37.568	58.6668	29.9536	81.9604	65.2204	45.6845
2	29980956	29983661	2705	-	ENSMUSG00000015335	protein_coding	ENSMUSG00000015335	Zdhhc12	ensembl_havana	17	ensembl_havana | havana	286.804	265.933	256.021	260.505	240.627	285.852	299.008	77.1857	89.7758	121.052	102.326	225.106	234.424	193.899	199.707
2	30061505	30064082	2577	+	ENSMUSG00000015337	protein_coding	ENSMUSG00000015337	Endog	ensembl_havana	6	ensembl_havana	55.1996	74.0398	59.5142	26.0552	67.7676	47.674	72.6956	9.67465	29.0716	24.3487	9.38902	106.665	103.999	92.014	73.8946
X	9301491	9354011	52520	-	ENSMUSG00000015340	protein_coding	ENSMUSG00000015340	Cybb	ensembl_havana	11	ensembl_havana | havana	35127.3	36707	21240.6	35225.5	27952.3	38715.2	49733.6	11722.3	25229.7	21946.9	20619.3	1541.25	734.119	778.238	1022.68
8	23731362	23747091	15729	-	ENSMUSG00000015341	protein_coding	ENSMUSG00000015341	Golga7	ensembl_havana	18	ensembl_havana | havana	1139.46	1368.44	1109.32	1668.31	1056.66	1462.48	1329.93	415.421	993.688	911.273	905.843	711.097	1660.47	1311.96	1003.46
X	9138995	9179490	40495	+	ENSMUSG00000015342	protein_coding	ENSMUSG00000015342	Xk	ensembl_havana	7	ensembl_havana	184.454	261.031	190.115	291.653	288.752	145.623	366.444	316.82	836.12	820.235	993.243	535.534	898.921	827.594	947.627
1	171509577	171532827	23250	+	ENSMUSG00000015355	protein_coding	ENSMUSG00000015355	Cd48	ensembl_havana	14	ensembl_havana | havana	3458.53	3193.63	2350.71	4068.87	1193.26	3830.44	2688.55	432.599	1084.01	836.928	798.142	639.009	2063.99	1426.91	1348.35
9	65201542	65237941	36399	+	ENSMUSG00000015357	protein_coding	ENSMUSG00000015357	Clpx	ensembl_havana	11	ensembl | ensembl_havana | havana	561.235	519.611	554.207	657.867	473.849	525.32	582.748	298.87	507.836	470.644	457.055	637.198	816.96	759.728	766.197
15	88959327	88971281	11954	+	ENSMUSG00000015363	protein_coding	ENSMUSG00000015363	Trabd	ensembl_havana	14	ensembl_havana | havana	2220.2	2386.03	2577.95	2331.33	2744.39	2081.86	2736.88	681.209	1396.21	1241.84	1233.37	2216.58	1568.71	1456.89	1274.59
15	89066416	89080700	14284	-	ENSMUSG00000015377	protein_coding	ENSMUSG00000015377	Dennd6b	ensembl_havana	11	ensembl_havana | havana	66.3584	166.667	115.759	116.095	75.2729	97.0818	73.7978	45.7729	52.2575	73.0489	92.7754	167.922	200.054	213.288	153.369
13	43938251	43956609	18358	+	ENSMUSG00000015396	protein_coding	ENSMUSG00000015396	Cd83	ensembl_havana	5	ensembl_havana | havana	484.754	1873.78	256.022	158.568	207.309	347.337	85.2492	58.338	120.594	97.0506	143.256	8.16917	1.76259	0.881356	6.52636
14	56496295	56499718	3423	-	ENSMUSG00000015437	protein_coding	ENSMUSG00000015437	Gzmb	ensembl_havana	6	ensembl_havana	244.064	127.452	27.8835	109.488	104.889	10.7869	17.8133	21.5402	36.1783	36.5244	13.6434	64.4457	67.8597	86.3729	73.0952
17	35028069	35042441	14372	-	ENSMUSG00000015451	lncRNA	ENSMUSG00000015451	C4a	ensembl_havana	17	ensembl | havana	28.1653	12.5338	8.27282	14.5813	14.7517	13.2846	22.7224	3.59003	5.47211	10.9519	17.0695	19.7388	15.8633	13.8567	13.0977
17	34816836	34819911	3075	+	ENSMUSG00000015452	protein_coding	ENSMUSG00000015452	Ager	ensembl_havana	15	ensembl_havana | havana	64.109	49.0198	157.161	50.9684	138.206	58.2491	62.3464	35.0028	56.2773	37.568	66.8529	69.8918	28.2014	35.2543	28.716
17	34866120	34874049	7929	+	ENSMUSG00000015461	protein_coding	ENSMUSG00000015461	Atf6b	ensembl_havana	16	ensembl_havana | havana	1464.4	1281.87	1331.67	1382.74	1169.81	1325.71	1688.46	306.051	712.848	682.486	623.504	1511.28	1249.66	1106.98	948.292
17	34832323	34834946	2623	-	ENSMUSG00000015467	protein_coding	ENSMUSG00000015467	Egfl8	ensembl_havana	15	ensembl_havana | havana	30.4225	22.0589	46.2055	37.7544	20.9777	44.2261	34.3542	9.87259	13.3994	8.34844	20.456	32.6767	14.1007	28.2034	21.537
17	34783242	34807478	24236	+	ENSMUSG00000015468	protein_coding	ENSMUSG00000015468	Notch4	ensembl_havana	15	ensembl_havana | havana	68.6079	378.679	81.1156	55.6877	45.6573	100.318	77.6149	11.6676	28.1387	25.0453	40.9303	28.1382	17.6259	20.2712	23.4949
17	34835636	34847485	11849	-	ENSMUSG00000015474	protein_coding	ENSMUSG00000015474	Ppt2	ensembl_havana	17	ensembl_havana | havana	769.307	632.355	690.138	630.498	674.989	686.045	866.486	140.909	285.406	223.321	196.452	489.242	452.985	407.187	436.614
17	34848507	34852101	3594	+	ENSMUSG00000015476	protein_coding	ENSMUSG00000015476	Prrt1	ensembl_havana	7	ensembl_havana | havana	28.118	47.7943	7.60459	11.3263	28.3816	14.0229	10.179	9.87259	18.7591	17.7404	5.45738	9.98454	2.64388	2.64407	2.61054
17	34820065	34822665	2600	-	ENSMUSG00000015478	protein_coding	ENSMUSG00000015478	Rnf5	ensembl_havana	14	ensembl_havana | havana	275.445	275.736	430.418	251.836	240.681	238.389	440.425	112.974	180.277	175.31	147.695	358.335	258.381	169.588	235.573
2	26899938	26911102	11164	+	ENSMUSG00000015488	protein_coding	ENSMUSG00000015488	Cacfd1	ensembl_havana	15	ensembl_havana | havana	452.137	373.776	478.243	330.351	260.37	476.779	395.709	106.803	186.251	181.579	208.745	658.071	218.561	282.034	284.55
10	13841819	14027119	185300	+	ENSMUSG00000015501	protein_coding	ENSMUSG00000015501	Hivep2	ensembl_havana	11	ensembl_havana | havana	747.941	1572.31	501.059	305.81	484.955	681.729	309.187	198.349	360.443	328.72	545.737	260.506	144.532	156.881	222.522
3	95341699	95404552	62853	+	ENSMUSG00000015522	protein_coding	ENSMUSG00000015522	Arnt	ensembl_havana	19	ensembl | ensembl_havana | havana	1157.34	1056.38	1042.67	1122.26	1089.61	1207.05	1395.8	389.519	769.122	818.149	845.893	988.466	904.206	822.303	947.628
13	114969617	115068637	99020	-	ENSMUSG00000015533	protein_coding	ENSMUSG00000015533	Itga2	ensembl_havana	10	ensembl_havana | havana	40.4899	51.4708	40.5578	38.6982	25.9136	48.5409	30.537	61.9281	104.515	85.5715	73.6746	203.322	160.396	210.644	193.18
13	114954772	114968812	14040	+	ENSMUSG00000015536	protein_coding	ENSMUSG00000015536	Mocs2	ensembl_havana	15	ensembl | ensembl_havana | havana	582.604	371.325	459.654	503.077	472.615	464.914	417.34	190.272	306.845	268.194	275.598	344.921	377.194	377.22	375.918
11	115073658	115078686	5028	-	ENSMUSG00000015542	protein_coding	ENSMUSG00000015542	Nat9	ensembl_havana	18	ensembl_havana | havana	245.189	231.619	251.797	284.101	308.495	230.839	349.904	108.599	186.251	208.711	129.613	265.044	220.324	208.882	184.043
8	69333143	69360101	26958	+	ENSMUSG00000015568	protein_coding	ENSMUSG00000015568	Lpl	ensembl_havana	17	ensembl_havana | havana	764.809	689.956	912.55	797.561	740.39	276.144	239.206	242.327	383.222	405.943	368.373	128.891	41.4209	35.2543	65.2636
17	26882205	26918622	36417	+	ENSMUSG00000015575	protein_coding	ENSMUSG00000015575	Atp6v0e	ensembl_havana	16	ensembl_havana | havana	1598.23	1975.5	1433.89	1865.06	1342.58	1725.89	2197.4	445.164	1193.89	1016.42	878.641	495.595	1236.46	1089.36	920.859
17	46694657	46731847	37190	+	ENSMUSG00000015597	protein_coding	ENSMUSG00000015597	Zfp318	ensembl_havana	18	ensembl_havana | havana	656.836	609.072	398.818	366.218	408.448	443.339	264.654	199.247	263.968	307.849	412.032	648.996	456.51	607.255	811.88
17	46753374	46798602	45228	-	ENSMUSG00000015599	protein_coding	ENSMUSG00000015599	Ttbk1	ensembl_havana	10	ensembl_havana | havana	29.2427	69.8533	19.4339	16.0456	45.6574	21.5737	15.2685	57.4405	61.6371	60.5262	55.9381	9.07685	4.40647	10.5763	9.1369
17	46859255	46867102	7847	-	ENSMUSG00000015605	protein_coding	ENSMUSG00000015605	Srf	ensembl_havana	7	ensembl_havana | havana	817.67	866.425	711.452	965.57	813.195	855.399	945.376	324.001	647.189	545.779	555.288	911.316	1052.27	914.849	817.1
2	9861889	9894846	32957	-	ENSMUSG00000015619	protein_coding	ENSMUSG00000015619	Gata3	ensembl_havana	11	ensembl_havana | havana	48.3629	123.775	43.0926	22.6526	307.262	23.7311	31.8094	27.8228	24.1189	37.568	51.8451	73.5225	43.1834	64.339	68.5268
2	179818166	179867653	49487	-	ENSMUSG00000015647	protein_coding	ENSMUSG00000015647	Lama5	ensembl_havana	10	ensembl_havana | havana	17.9955	24.5099	32.9532	14.1579	267.774	9.70818	10.179	6.28256	16.0792	12.5227	27.2869	209.675	116.331	167.458	144.233
9	40712280	40721384	9104	+	ENSMUSG00000015656	protein_coding	ENSMUSG00000015656	Hspa8	ensembl_havana	18	ensembl_havana | havana	41237.8	19991	27182.4	27099	35725.2	40096.5	27123.1	8255.3	17491.7	15295.2	21815.9	38341.7	54537.9	43521	51750.5
17	6092471	6130017	37546	-	ENSMUSG00000015659	protein_coding	ENSMUSG00000015659	Serac1	ensembl_havana	13	ensembl_havana | havana	55.1112	94.8063	63.3716	87.7783	76.3293	96.5427	86.3911	33.926	49.5698	61.3609	66.8529	107.19	103.161	130.441	117.154
X	99666489	99670175	3686	-	ENSMUSG00000015668	protein_coding	ENSMUSG00000015668	Pdzd11	ensembl_havana	14	ensembl_havana | havana	390.928	361.48	424.64	486.676	475.804	431.882	530.883	195.616	381.866	400.578	381.842	386.798	535.242	391.93	444.655
13	14787825	14848822	60997	+	ENSMUSG00000015671	protein_coding	ENSMUSG00000015671	Psma2	ensembl_havana	12	ensembl_havana | havana	2725.81	2000.85	2035.63	2330.46	2468.54	2216.53	2512.75	788.648	1830.24	1705.96	1402.07	1271.57	2980.4	2235.44	2029.98
13	14782769	14787751	4982	-	ENSMUSG00000015672	protein_coding	ENSMUSG00000015672	Mrpl32	ensembl_havana	5	ensembl_havana | havana	616.346	470.59	573.725	540.832	567.632	495.118	501.316	239.635	410.02	413.248	367.009	727.961	749.981	615.174	683.963
3	95230836	95264514	33678	-	ENSMUSG00000015697	protein_coding	ENSMUSG00000015697	Setdb1	ensembl_havana	15	ensembl_havana | havana	1566.03	1386.41	1378.79	1489.23	1337.5	1774.53	1586.15	455.378	744.827	730.567	847.959	2341.25	2300.89	2218.03	2327.52
3	95203407	95214488	11081	-	ENSMUSG00000015702	protein_coding	ENSMUSG00000015702	Anxa9	ensembl_havana	14	ensembl | ensembl_havana | havana	60.7348	33.0884	65.0614	80.2281	107.357	65.7999	71.253	28.7203	45.5578	45.9164	21.8295	233.275	216.799	199.186	240.822
3	95160985	95189388	28403	-	ENSMUSG00000015711	protein_coding	ENSMUSG00000015711	Prune1	ensembl_havana	9	ensembl_havana | havana	411.647	340.688	360.795	450.221	491.125	384.012	554.756	223.48	472.997	481.079	343.815	582.734	548.165	457.424	556.699
3	95222102	95230911	8809	+	ENSMUSG00000015714	protein_coding	ENSMUSG00000015714	Cers2	ensembl_havana	12	ensembl_havana | havana	2752.19	2384.81	1820.87	2891.97	3076.32	2607.18	3272.55	966.615	1654.82	1803.26	1555.35	1591.17	3277.51	2889.97	2855.92
6	17636233	17666972	30739	+	ENSMUSG00000015733	protein_coding	ENSMUSG00000015733	Capza2	ensembl_havana	14	ensembl_havana | havana	7793.18	6563.7	6250.99	8645.87	6237.79	7980.01	7877.32	1649.62	4155.14	3527.23	3024.75	2482.53	4528.07	3494.59	3325.19
3	95895741	95903314	7573	-	ENSMUSG00000015745	protein_coding	ENSMUSG00000015745	Plekho1	ensembl_havana	10	ensembl_havana | havana	2729.72	3002.47	2441.09	2207.68	1029.14	2970.72	1897.12	327.591	657.91	523.865	622.141	818.732	603.685	439.797	450.32
3	95907144	95965779	58635	-	ENSMUSG00000015747	protein_coding	ENSMUSG00000015747	Vps45	ensembl_havana	6	ensembl_havana | havana	290.178	338.237	191.804	254.842	228.287	302.032	249.386	72.6982	188.931	173.23	140.528	265.044	260.863	263.526	309.35
3	95737436	95763198	25762	-	ENSMUSG00000015748	protein_coding	ENSMUSG00000015748	Prpf3	ensembl_havana	14	ensembl_havana | havana	592.726	387.256	688.636	452.108	593.542	538.264	468.234	287.202	341.684	348.548	446.141	1360.62	891.872	698.036	1003.75
3	95836558	95854703	18145	+	ENSMUSG00000015749	protein_coding	ENSMUSG00000015749	Anp32e	ensembl_havana	13	ensembl_havana | havana	3049.13	2030.63	3134.73	3674.48	2360.59	2842.39	2871.77	1346.26	2503	2810.33	2642.72	3951.14	5351.27	3761.68	3452.46
3	95801281	95805601	4320	+	ENSMUSG00000015750	protein_coding	ENSMUSG00000015750	Aph1a	ensembl_havana	16	ensembl_havana | havana	1679.35	1841.26	1679.75	2088.57	1549.53	2065.92	2102.3	372.463	875.576	791.727	710.576	1040.2	1494.12	1225.12	895.224
10	7781417	7831995	50578	-	ENSMUSG00000015755	protein_coding	ENSMUSG00000015755	Tab2	ensembl_havana	17	ensembl_havana | havana	3126.73	3007.36	2745.25	3091.15	2482.79	3315.85	3320.88	1024.95	1956.3	1933.71	2221.16	2097.68	2180.31	1987.47	2104.74
10	7668655	7698900	30245	+	ENSMUSG00000015757	protein_coding	ENSMUSG00000015757	Ppil4	ensembl_havana	11	ensembl_havana | havana	1349.66	1359.07	1144.07	1593.24	1236.45	1441.13	1304.18	678.516	1260.88	1127.04	1098.3	1167.28	1580.16	1341.43	1389.46
14	47013024	47025869	12845	-	ENSMUSG00000015759	protein_coding	ENSMUSG00000015759	Cnih1	ensembl_havana	12	ensembl_havana | havana	695.064	578.434	933.68	978.777	582.431	906.094	795.235	269.252	560.082	522.821	556.647	629.934	1307.84	1055.87	1076.18
6	137454243	137631875	177632	-	ENSMUSG00000015766	protein_coding	ENSMUSG00000015766	Eps8	ensembl_havana	15	ensembl_havana | havana	1288.93	1637.26	551.754	1591.35	1221.64	1068.98	1605.74	182.194	273.347	361.07	356.094	106.199	112.806	96.9492	144.233
2	26795274	26800690	5416	-	ENSMUSG00000015776	protein_coding	ENSMUSG00000015776	Med22	ensembl_havana	13	ensembl_havana | havana	1033.62	1175.25	1258.98	1539.44	1010.63	1208.13	1456.87	352.721	908.477	787.884	646.699	907.685	1656.84	1376.68	1088.6
2	26803393	26806543	3150	-	ENSMUSG00000015790	protein_coding	ENSMUSG00000015790	Surf1	ensembl_havana	17	ensembl_havana | havana	705.199	627.454	744.404	687.13	577.504	543.658	689.212	181.297	344.364	275.499	301.52	415.721	481.18	373.695	422.254
5	45677571	45686619	9048	+	ENSMUSG00000015804	protein_coding	ENSMUSG00000015804	Med28	ensembl_havana	15	ensembl_havana | havana	673.706	882.355	493.453	759.807	475.083	717.326	799.05	192.964	451.558	412.204	397.024	408.459	781.708	631.053	546.256
5	45591363	45607579	16216	-	ENSMUSG00000015806	protein_coding	ENSMUSG00000015806	Qdpr	ensembl_havana	13	ensembl_havana | havana	451.012	595.59	613.434	741.873	325.771	533.95	660.365	96.9309	300.146	310.98	293.334	1096.48	1655.08	1276.2	792.305
11	50090193	50101655	11462	-	ENSMUSG00000015837	protein_coding	ENSMUSG00000015837	Sqstm1	ensembl_havana	16	ensembl_havana | havana	2832.41	3561.91	2772.93	2684.73	3186.89	2814.29	3294.12	1339.31	2405.71	2350.26	2358.29	2391.69	2108.98	1871.49	1868.32
2	75505857	75534986	29129	-	ENSMUSG00000015839	protein_coding	ENSMUSG00000015839	Nfe2l2	ensembl_havana	7	ensembl_havana | havana	2248.31	2502.46	1921.43	2504.06	2458.09	2757.12	2962.09	1238.56	2320.77	2065.2	2054.7	1853.49	2591.01	2240.41	2083.21
2	27566452	27652970	86518	+	ENSMUSG00000015846	protein_coding	ENSMUSG00000015846	Rxra	ensembl_havana	16	ensembl | ensembl_havana | havana	1195.57	1171.57	960.714	1337.44	624.396	1275	1185.85	294.383	530.615	362.113	450.235	442.042	273.201	230.034	305.435
3	95583511	95595229	11718	-	ENSMUSG00000015850	protein_coding	ENSMUSG00000015850	Adamtsl4	ensembl_havana	12	ensembl_havana | havana	56.236	64.9513	96.3247	45.3053	371.428	83.0589	137.417	11.6676	46.8978	61.5698	38.2017	35.3997	25.5575	11.4576	13.7054
3	87265188	87278381	13193	+	ENSMUSG00000015854	protein_coding	ENSMUSG00000015854	Cd5l	ensembl_havana	8	ensembl_havana	49.4876	180.148	40.5578	7.55088	48.1253	21.5737	44.5332	88.8533	254.588	246.279	268.776	9.98454	4.40647	1.76271	13.0527
11	116361671	116385029	23358	-	ENSMUSG00000015869	protein_coding	ENSMUSG00000015869	Prpsap1	ensembl_havana	17	ensembl_havana | havana	596.1	524.512	467.26	642.77	542.952	648.29	601.834	152.576	254.588	278.63	279.69	752.472	1087.52	850.51	883.019
5	45687047	45796957	109910	-	ENSMUSG00000015879	protein_coding	ENSMUSG00000015879	Fam184b	ensembl_havana	9	ensembl_havana | havana	7.71519	14.706	17.1155	4.84466	14.755	16.4321	14.7959	34.0816	13.7207	20.0224	27.8946	8.20541	5.28777	15.4098	14.1378
5	45827261	45857889	30628	+	ENSMUSG00000015880	protein_coding	ENSMUSG00000015880	Ncapg	ensembl_havana	14	ensembl_havana | havana	1818.54	998.055	1693.18	1955.35	1601.54	1587.01	1930.13	900.713	1822.62	1872.27	1892.31	1649.51	2141.73	1923.83	1947.81
5	45854523	46014958	160435	-	ENSMUSG00000015882	protein_coding	ENSMUSG00000015882	Lcorl	ensembl_havana	19	ensembl_havana | havana	794.188	970.092	796.906	1255.66	717.114	1312.5	792.745	368.368	728.613	627.047	821.372	557.078	935.741	1063.08	931.618
10	93289273	93320738	31465	+	ENSMUSG00000015889	protein_coding	ENSMUSG00000015889	Lta4h	ensembl_havana	9	ensembl_havana | havana	4500.01	6397.06	4926.96	8337.02	7296.64	5748.37	7877.32	3056.91	6277.6	5510.98	4799.78	4419.53	5406.8	4235.79	4415.12
2	143757240	143785245	28005	+	ENSMUSG00000015932	protein_coding	ENSMUSG00000015932	Dstn	ensembl_havana	9	ensembl_havana	6759.56	7236.55	6861.03	8443.77	14252.5	6937.03	13036.8	4604.22	9816.37	8303.57	6203.67	3400.19	2978.78	2407.87	2789.37
13	56221432	56284175	62743	-	ENSMUSG00000015937	protein_coding	ENSMUSG00000015937	Macroh2a1	ensembl_havana	16	ensembl_havana | havana	12214.1	8724.71	12553.1	16364.1	8038.98	11924.6	11508.8	2223.52	4603.49	4530.17	3901.6	19891	21677.6	16382.1	14289.4
5	134212858	134253210	40352	+	ENSMUSG00000015942	protein_coding	ENSMUSG00000015942	Gtf2ird2	ensembl_havana	10	ensembl_havana | havana	456.706	363.68	514.869	505.531	576.001	707.329	582.447	177.865	307.662	268.225	364.984	445.63	317.28	379.482	324.437
3	96103904	96127026	23122	-	ENSMUSG00000015943	protein_coding	ENSMUSG00000015943	Bola1	ensembl_havana	12	ensembl | havana	195.701	205.883	266.161	213.312	257.902	148.859	218.849	69.1082	85.7559	123.139	99.5972	519.196	393.938	373.695	288.464
5	134128550	134173183	44633	+	ENSMUSG00000015944	protein_coding	ENSMUSG00000015944	Castor2	ensembl_havana	10	ensembl_havana | havana	338.54	297.795	315.168	226.526	197.437	286.931	318.094	58.338	65.6569	85.5715	68.2172	206.045	93.4172	116.339	192.528
3	96190225	96201286	11061	-	ENSMUSG00000015947	protein_coding	ENSMUSG00000015947	Fcgr1	ensembl_havana	11	ensembl_havana | havana	2457.51	155.638	943.811	750.367	803.323	1435.73	1081.52	78.0832	225.109	194.101	141.892	19.9691	17.6259	7.93221	30.0213
5	134248907	134258480	9573	-	ENSMUSG00000015950	protein_coding	ENSMUSG00000015950	Ncf1	ensembl_havana	14	ensembl_havana | havana	13817.6	13876.6	13007	15662.7	23599.6	15214.6	27597.9	8685.74	17015.7	14211.7	12250	4463.16	3280.15	2945.04	2548.5
1	177590528	177624078	33550	-	ENSMUSG00000015961	protein_coding	ENSMUSG00000015961	Adss	ensembl_havana	9	ensembl_havana | havana	2504.72	1873.79	2327.02	2884.44	1973.14	2000.97	2776.35	751.216	1386.83	1359.75	998.699	2316.4	2843	2512.78	2514.62
14	29718092	29730854	12762	-	ENSMUSG00000015966	protein_coding	ENSMUSG00000015966	Il17rb	ensembl_havana	18	ensembl | havana	82.1045	75.9807	79.4257	44.3614	13.5738	72.272	50.895	43.0804	45.5578	63.6569	73.6746	161.387	141.007	162.17	182.086
14	29761896	30213413	451517	-	ENSMUSG00000015968	protein_coding	ENSMUSG00000015968	Cacna1d	ensembl_havana	19	ensembl_havana | havana	312.554	278.182	377.753	310.078	87.5305	342.887	219.387	57.2527	87.9307	93.5551	70.4754	106.57	81.91	107.541	66.2669
14	29730980	29762485	31505	+	ENSMUSG00000015970	protein_coding	ENSMUSG00000015970	Chdh	ensembl_havana	20	ensembl_havana | havana	1437.52	601.726	2039.66	1997.66	1089.69	1659.16	1337.99	391.502	706.65	784.079	707.202	4226.69	3061.65	2904.01	2257.15
14	29700294	29728312	28018	+	ENSMUSG00000015971	protein_coding	ENSMUSG00000015971	Actr8	ensembl_havana	6	ensembl_havana | havana	855.91	757.356	814.534	860.801	814.428	827.353	781.239	290.793	479.698	473.775	444.776	859.762	846.044	722.713	786.426
7	138792904	138822896	29992	+	ENSMUSG00000015980	protein_coding	ENSMUSG00000015980	Lrrc27	ensembl_havana	15	ensembl_havana | havana	12.3719	35.5394	13.5193	29.2597	74.039	38.8327	59.8017	23.3352	53.5975	38.6115	35.473	19.3743	8.81295	10.7091	15.0106
7	138683554	138793224	109670	-	ENSMUSG00000015981	protein_coding	ENSMUSG00000015981	Stk32c	ensembl_havana	13	ensembl_havana	73.1067	120.099	54.0771	66.0702	23.4457	21.5737	19.0856	2.69252	8.03962	4.17422	1.36434	2.72306	3.52518	4.40678	5.22109
8	26488750	26505679	16929	-	ENSMUSG00000015994	protein_coding	ENSMUSG00000015994	Fnta	ensembl_havana	11	ensembl_havana | havana	777.178	819.855	855.943	840.034	773.709	907.173	960.646	289.895	621.73	510.298	487.071	677.134	1087.52	938.645	922.175
13	113003952	113063933	59981	-	ENSMUSG00000016018	protein_coding	ENSMUSG00000016018	Mtrex	ensembl_havana	5	ensembl_havana | havana	1699.27	1327.01	1499.8	1530.9	1386.99	1346.06	1652.76	633.902	1110.6	1109.26	1065.83	2092.47	2534.95	1945.33	2379.27
2	158148413	158174773	26360	+	ENSMUSG00000016024	protein_coding	ENSMUSG00000016024	Lbp	ensembl_havana	10	ensembl_havana | havana	736.692	920.348	984.372	1040.14	1660.94	857.555	1676.99	472.987	925.897	953.808	721.738	670.779	784.351	577.288	606.953
15	85783130	85918405	135275	-	ENSMUSG00000016028	protein_coding	ENSMUSG00000016028	Celsr1	ensembl_havana	12	ensembl_havana | havana	669.21	740.197	724.122	759.803	1155.01	468.149	544.577	136.421	296.126	289.065	358.823	1699.19	970.299	1034.72	965.248
9	32333500	32454158	120658	-	ENSMUSG00000016087	protein_coding	ENSMUSG00000016087	Fli1	ensembl_havana	14	ensembl_havana | havana	3076.11	2873.78	2906.64	3488.51	3709.35	3025.72	3673.38	1736.68	2985.38	2531.67	2449	1801.75	2506.4	2260.68	2023.16
1	192773412	192812581	39169	-	ENSMUSG00000016181	protein_coding	ENSMUSG00000016181	Utp25	ensembl_havana	10	ensembl_havana | havana	265.433	279.413	291.509	304.866	235.691	293.403	299.008	105.009	162.132	147.141	162.357	506.489	629.245	579.051	628.49
1	192903942	192946384	42442	-	ENSMUSG00000016194	protein_coding	ENSMUSG00000016194	Hsd11b1	ensembl_havana	15	ensembl_havana | havana	897.526	1278.2	781.584	918.375	1736.21	966.502	2272.48	581.585	1708.41	1446.37	1025.98	117.091	84.6043	128.678	137.706
17	37581111	37585376	4265	+	ENSMUSG00000016206	protein_coding	ENSMUSG00000016206	H2-M3	ensembl_havana	7	ensembl_havana	1309.17	870.102	1019.86	792.842	784.813	967.582	792.69	99.6234	231.809	209.755	199.194	255.967	246.763	198.305	216.022
X	35592006	35625995	33989	+	ENSMUSG00000016239	protein_coding	ENSMUSG00000016239	Lonrf3	ensembl_havana	12	ensembl_havana | havana	210.323	142.157	241.657	271.831	264.072	237.311	231.572	76.2882	135.334	131.488	171.907	228.737	150.701	176.271	155.327
2	174302865	174305899	3034	-	ENSMUSG00000016252	protein_coding	ENSMUSG00000016252	Atp5e	ensembl_havana	8	ensembl_havana | havana	1836.67	1803.92	2356.6	1625.32	1142.67	1551.15	2157.94	266.56	929.915	744.055	680.809	1637.47	1713.23	1270.92	1153.86
2	174257597	174269296	11699	+	ENSMUSG00000016253	protein_coding	ENSMUSG00000016253	Nelfcd	ensembl_havana	13	ensembl_havana | havana	896.403	838.238	902.406	1148.67	924.255	826.272	1110.79	479.268	743.664	864.061	822.7	1566.67	1298.15	1143.11	1087.95
2	174292488	174299676	7188	+	ENSMUSG00000016255	protein_coding	ENSMUSG00000016255	Tubb1	ensembl_havana	6	ensembl_havana	5.6236	6.12748	16.8991	18.8772	19.7437	3.23606	3.81713	70.0056	288.086	154.446	130.977	9.98454	30.8453	41.4238	34.5897
2	174269286	174280833	11547	-	ENSMUSG00000016256	protein_coding	ENSMUSG00000016256	Ctsz	ensembl_havana	11	ensembl_havana	8862.79	6098.07	6933.69	6008.61	7354.54	6605.88	7056.6	1265.49	2295.31	2342.78	1749.09	4045.55	3406.2	2396.41	2902.92
2	174306860	174314875	8015	-	ENSMUSG00000016257	protein_coding	ENSMUSG00000016257	Prelid3b	ensembl_havana	16	ensembl_havana | havana	1017.87	765.937	839.042	1088.27	1082.2	828.433	1000.09	473.885	816.021	900.591	736.746	1219.93	1521.12	1097.29	1255.68
X	36137553	36147876	10323	+	ENSMUSG00000016308	protein_coding	ENSMUSG00000016308	Ube2a	ensembl_havana	13	ensembl_havana | havana	714.197	660.543	784.117	786.236	556.526	727.035	972.096	192.964	556.074	424.726	429.769	273.213	717.375	493.56	518.194
X	36059304	36062461	3157	+	ENSMUSG00000016319	protein_coding	ENSMUSG00000016319	Slc25a5	ensembl_havana	4	ensembl_havana | havana	9116.33	6858.77	9060.45	9095.84	8808.97	8657.61	10017.4	2175.86	5260.65	5074.86	4213.86	7713.07	15276.4	10872.1	9557.83
2	180829040	180830565	1525	+	ENSMUSG00000016344	protein_coding	ENSMUSG00000016344	Ppdpf	ensembl_havana	15	ensembl_havana | havana	641.717	578.687	710.433	497	375.994	537.437	436.847	179.178	272.57	244.116	284.924	515.553	554.787	459.358	525.402
2	180628328	180660157	31829	+	ENSMUSG00000016356	protein_coding	ENSMUSG00000016356	Col20a1	ensembl_havana	19	ensembl_havana | havana	3.37416	29.4119	31.2633	11.3263	23.4457	10.7869	19.0856	12.5651	22.7789	8.34844	24.5582	12.7076	4.40647	11.4576	7.83163
X	74829260	74918789	89529	-	ENSMUSG00000016382	protein_coding	ENSMUSG00000016382	Pls3	ensembl_havana	16	ensembl_havana | havana	57.3607	60.0493	39.7128	98.1615	62.9331	90.6097	87.7939	14.3601	29.4786	26.0889	32.7443	61.7226	51.1151	65.2204	58.7372
X	36390448	36414400	23952	+	ENSMUSG00000016409	protein_coding	ENSMUSG00000016409	Nkap	ensembl_havana	5	ensembl_havana | havana	666.959	612.748	618.506	735.267	626.863	621.324	765.97	206.427	538.654	488.384	518.451	575.472	861.025	765.017	655.247
X	36451241	36454817	3576	-	ENSMUSG00000016427	protein_coding	ENSMUSG00000016427	Ndufa1	ensembl_havana	8	ensembl_havana	825.544	549.022	831.435	577.642	855.15	601.907	647.639	292.588	472.998	352.722	321.985	451.12	629.244	448.61	522.761
13	30090558	30170047	79489	-	ENSMUSG00000016477	protein_coding	ENSMUSG00000016477	E2f3	ensembl_havana	19	ensembl_havana | havana	442.015	469.366	632.028	613.508	419.554	413.137	524.218	204.632	403.321	392.378	407.938	925.845	1172.11	995.924	931.952
1	194779690	194813895	34205	-	ENSMUSG00000016481	protein_coding	ENSMUSG00000016481	Cr1l	ensembl_havana	16	ensembl_havana | havana	1187.88	1545.16	994.838	1455.99	1304.1	1543.29	1693.11	533.115	1173.58	1136.92	1139.42	618.316	1343.41	1266.2	1130.97
6	146789985	146933524	143539	+	ENSMUSG00000016487	protein_coding	ENSMUSG00000016487	Ppfibp1	ensembl_havana	16	ensembl_havana | havana	370.033	325.982	272.075	379.431	308.496	334.393	264.655	104.111	152.753	181.579	133.706	463.826	418.615	336.678	413.772
1	194719134	194774558	55424	-	ENSMUSG00000016493	protein_coding	ENSMUSG00000016493	Cd46	ensembl_havana	14	ensembl_havana | havana	54.9078	133.731	74.3931	101.905	85.0964	80.3386	55.2269	65.5927	77.4374	105.947	68.6094	32.4135	28.1351	58.3991	53.0672
1	194621127	194643588	22461	+	ENSMUSG00000016494	protein_coding	ENSMUSG00000016494	Cd34	ensembl_havana	10	ensembl_havana | havana	1141.59	620.058	2263.61	3127	477.263	1418.34	1198.53	404.776	680.687	608.392	609.788	4185.08	7825.84	6813.68	6158.12
19	29325999	29344791	18792	-	ENSMUSG00000016495	protein_coding	ENSMUSG00000016495	Plgrkt	ensembl_havana	13	ensembl_havana | havana	487.003	588.238	388.679	472.874	529.378	385.091	299.008	171.424	330.964	277.586	279.691	565.488	592.23	708.611	540.382
19	29344855	29365496	20641	+	ENSMUSG00000016496	protein_coding	ENSMUSG00000016496	Cd274	ensembl_havana	8	ensembl_havana	302.166	583.45	204.346	132.547	797.106	164.762	113.818	74.8893	122.632	169.85	152.098	344.105	157.988	229.576	234.396
19	29388319	29448562	60243	+	ENSMUSG00000016498	protein_coding	ENSMUSG00000016498	Pdcd1lg2	ensembl_havana	11	ensembl_havana | havana	25.8685	140.932	26.1936	6.60702	190.033	19.4164	7.63426	6.28256	13.3994	9.392	12.2791	16.3383	12.3381	10.5763	8.48427
5	146885467	146892425	6958	+	ENSMUSG00000016503	protein_coding	ENSMUSG00000016503	Gtf3a	ensembl_havana	19	ensembl_havana | havana	965.912	704.754	752.117	971.956	713.129	812.288	967.24	195.451	465.033	462.229	397.338	929.368	1743.33	1287.32	1113.03
5	146888383	146900611	12228	-	ENSMUSG00000016510	protein_coding	ENSMUSG00000016510	Mtif3	ensembl_havana	12	ensembl_havana | havana	399.497	420.25	420.679	368.325	381.415	386.133	398.02	169.835	218.334	231.735	209.796	370.437	399.1	343.194	356.666
5	146953465	147013397	59932	-	ENSMUSG00000016520	protein_coding	ENSMUSG00000016520	Lnx2	ensembl_havana	8	ensembl_havana | havana	347.538	399.512	364.175	352.06	637.969	396.957	388.075	133.729	183.571	194.101	211.473	432.966	534.946	386.034	455.539
1	131055192	131066078	10886	-	ENSMUSG00000016526	protein_coding	ENSMUSG00000016526	Dyrk3	ensembl_havana	9	ensembl_havana | havana	160.835	140.932	325.307	190.66	169.056	201.714	157.775	358.106	699.446	682.485	825.428	566.396	690.935	586.983	720.51
1	130981437	131025564	44127	-	ENSMUSG00000016528	protein_coding	ENSMUSG00000016528	Mapkapk2	ensembl_havana	11	ensembl_havana | havana	7498.46	6881.16	8016.08	8642.92	6369.78	7647.96	9976.7	1566.15	4176.59	3642.01	3157.09	5536.83	6287.22	4879.2	3982.35
X	37490234	37545332	55098	-	ENSMUSG00000016534	protein_coding	ENSMUSG00000016534	Lamp2	ensembl_havana	16	ensembl_havana | havana	6524.57	5645.86	4615.99	7565	7196.64	7538.9	10541.6	1707.97	5007.35	4632.32	3975.7	1686.48	3716.47	3100.58	2458.45
15	85220446	85347414	126968	+	ENSMUSG00000016541	protein_coding	ENSMUSG00000016541	Atxn10	ensembl_havana	11	ensembl_havana	2280.93	2164.23	2027.89	2484.24	3577.32	2310.55	4220.47	1047.39	2344.89	2073.54	1709.52	1847.14	1759.06	1396.95	1456.68
15	77824722	77840923	16201	-	ENSMUSG00000016552	protein_coding	ENSMUSG00000016552	Foxred2	ensembl_havana	14	ensembl_havana | havana	1780.43	1232.85	1972.13	1890.54	988.419	2763.58	1347.45	329.385	533.295	526.994	574.39	782.425	956.209	964.21	883.671
15	77843198	77855014	11816	-	ENSMUSG00000016554	protein_coding	ENSMUSG00000016554	Eif3d	ensembl_havana	10	ensembl_havana | havana	2698.4	2137.56	2024.58	2902	2809.59	2507.63	2645.56	864.7	1698.83	1800.71	1546.03	4350.09	5225.51	4020.08	3770.61
11	115912738	115918789	6051	-	ENSMUSG00000016559	protein_coding	ENSMUSG00000016559	H3f3b	ensembl_havana	15	ensembl | havana	14013.7	13071.7	11781.7	16686.8	15210.3	11634.5	12042.6	6689.11	9623.74	10614.2	8626.59	15858.1	17277.2	17070.9	14745.5
15	84807612	84827165	19553	+	ENSMUSG00000016619	protein_coding	ENSMUSG00000016619	Nup50	ensembl_havana	11	ensembl_havana | havana	1978.39	1330.88	1655.26	2040.64	1885.52	1840.24	2068.89	873.268	1682.95	1746.92	1814.58	3290.38	3391.2	2691.68	3021.65
15	78043663	78058308	14645	-	ENSMUSG00000016637	protein_coding	ENSMUSG00000016637	Ift27	ensembl_havana	8	ensembl_havana | havana	223.819	212.011	263.626	194.435	269.008	127.285	166.681	97.8284	180.891	151.316	151.442	337.659	364.856	285.56	348.508
15	83259808	83348808	89000	-	ENSMUSG00000016664	protein_coding	ENSMUSG00000016664	Pacsin2	ensembl_havana	17	ensembl | ensembl_havana | havana	2825.29	2512.27	2566.11	2946.73	2849.29	3045.14	3431.58	1128.17	2206.87	2281.22	2081.99	2957.22	2553.12	2132.88	2410.85
13	24511387	24661361	149974	+	ENSMUSG00000016756	protein_coding	ENSMUSG00000016756	Cmah	ensembl_havana	18	ensembl | ensembl_havana | havana	863.784	941.18	572.878	348.284	862.553	1023.68	2337.35	416.443	933.936	1236.61	930.486	149.768	141.889	182.441	187.959
15	83459291	83479359	20068	-	ENSMUSG00000016757	protein_coding	ENSMUSG00000016757	Ttll12	ensembl_havana	12	ensembl_havana | havana	470.131	283.09	442.754	366.218	347.983	418.529	452.967	279.125	513.197	537.432	641.243	2074.08	1827.79	1467.45	1685.11
14	52516603	52533859	17256	+	ENSMUSG00000016831	protein_coding	ENSMUSG00000016831	Tox4	ensembl_havana	13	ensembl_havana | havana	2416.67	2185.26	2032.59	2721.85	2253.31	2394.15	2252.58	828.235	1441.04	1542.64	1264.44	2073.92	2525.91	2139.39	2219.94
5	100946493	100952338	5845	+	ENSMUSG00000016833	protein_coding	ENSMUSG00000016833	Mrps18c	ensembl_havana	15	ensembl_havana | havana	486.874	387.121	506.973	430.384	452.871	323.69	422.429	156.993	298.492	348.511	279.69	284.105	511.141	401	429.424
2	162773448	162779042	5594	+	ENSMUSG00000016921	protein_coding	ENSMUSG00000016921	Srsf6	ensembl_havana	15	ensembl_havana | havana	3267.27	3432.62	3629.07	4515.42	3763.62	3801.33	3140.23	1486.27	2690.61	2682.96	2795.55	5902.82	7608.96	7109.14	6162.83
2	160573220	160617681	44461	+	ENSMUSG00000016933	protein_coding	ENSMUSG00000016933	Plcg1	ensembl_havana	18	ensembl_havana | havana	623.095	993.878	752.684	518.179	697.138	510.219	432.587	234.249	305.506	284.891	421.582	1269.83	986.134	1095.44	846.449
11	115310954	115322101	11147	+	ENSMUSG00000016940	protein_coding	ENSMUSG00000016940	Kctd2	ensembl_havana	19	ensembl_havana | havana	472.381	665.444	619.354	538	346.749	539.343	500.043	174.117	375.183	267.15	215.566	285.921	326.079	351.661	308.044
17	24266708	24292460	25752	-	ENSMUSG00000016946	protein_coding	ENSMUSG00000016946	Kctd5	ensembl_havana	7	ensembl_havana | havana	552.237	575.983	511.197	550.27	426.958	515.612	576.386	146.294	312.205	329.764	249.675	427.52	655.684	520.882	405.287
11	17888756	17903876	15120	-	ENSMUSG00000016984	protein_coding	ENSMUSG00000016984	Etaa1	ensembl_havana	8	ensembl_havana	397.026	310.05	479.082	546.495	380.067	378.619	543.305	170.467	347.043	343.294	433.862	623.58	859.262	678.644	735.51
2	164195990	164231016	35026	-	ENSMUSG00000017002	protein_coding	ENSMUSG00000017002	Slpi	ensembl_havana	15	ensembl_havana | havana	1787.18	2020.84	2106.47	2834.41	2734.51	2294.37	4536.02	1694.5	4049.29	3181.8	2103.82	836.891	715.611	735.933	505.793
2	164266167	164285808	19641	-	ENSMUSG00000017009	protein_coding	ENSMUSG00000017009	Sdc4	ensembl_havana	4	ensembl_havana | havana	464.509	366.423	584.708	237.853	415.852	465.993	156.502	266.56	531.955	482.123	560.746	40.8458	15.8633	29.0848	67.2215
X	35375763	35434913	59150	+	ENSMUSG00000017057	protein_coding	ENSMUSG00000017057	Il13ra1	ensembl_havana	10	ensembl_havana	1871.53	2243.88	1292.78	1488.47	1775.7	2310.55	3374.34	230.66	548.034	817.104	463.877	32.6767	24.6763	22.0339	70.4847
11	101442975	101472778	29803	+	ENSMUSG00000017119	protein_coding	ENSMUSG00000017119	Nbr1	ensembl_havana	21	ensembl | havana	2116.72	1805.15	1771.87	2116.13	2116.27	2608.26	2236.83	1170.35	2059.48	2050.58	2435.37	2229.29	1974.1	1811.19	1843.05
11	118022845	118139419	116574	-	ENSMUSG00000017132	protein_coding	ENSMUSG00000017132	Cyth1	ensembl_havana	18	ensembl | ensembl_havana | havana	1445.26	1747.55	1546.25	1737.66	1664.66	2475.59	1718.97	515.17	988.876	866.152	1038.27	925.843	936.823	756.208	659.163
2	51020450	51039124	18674	-	ENSMUSG00000017144	protein_coding	ENSMUSG00000017144	Rnd3	ensembl_havana	9	ensembl_havana | havana	2868.03	2226.71	1769.32	2745.66	635.501	2800.27	1918.75	289.895	468.977	483.166	372.466	226.014	103.993	107.526	165.117
11	101379590	101442782	63192	-	ENSMUSG00000017146	protein_coding	ENSMUSG00000017146	Brca1	ensembl_havana	13	ensembl_havana | havana	1150.59	557.601	899.876	1546.99	1095.77	1166.06	1123.51	851.733	1299.74	1675.95	1813.21	2240.17	2108.06	1995.38	2334.48
11	101061349	101081551	20202	+	ENSMUSG00000017167	protein_coding	ENSMUSG00000017167	Cntnap1	ensembl_havana	7	ensembl_havana | havana	15.7461	51.4708	21.9688	21.7088	53.0613	15.1016	53.4398	13.4626	22.7789	27.1324	23.1939	63.5506	25.5575	39.661	31.3265
11	100313147	100332635	19488	-	ENSMUSG00000017176	protein_coding	ENSMUSG00000017176	Nt5c3b	ensembl_havana	18	ensembl | havana	183.329	251.227	169.836	254.842	293.688	165.039	229.028	66.4156	105.855	133.575	132.341	355.57	546.402	457.424	370.471
11	101168794	101169941	1147	-	ENSMUSG00000017188	protein_coding	ENSMUSG00000017188	Coa3	ensembl_havana	4	ensembl_havana | havana	580.355	600.493	493.453	591.8	541.718	564.153	709.986	236.045	548.034	419.509	361.551	438.412	901.565	690.983	602.383
11	98595417	98620262	24845	-	ENSMUSG00000017210	protein_coding	ENSMUSG00000017210	Med24	ensembl_havana	15	ensembl_havana | havana	1171.96	1055.15	1116.18	1364.82	1126.63	1125.07	1249.47	396.698	706.146	774.317	706.732	2310.96	2096.61	1873.76	1805.18
11	98573380	98586806	13426	+	ENSMUSG00000017221	protein_coding	ENSMUSG00000017221	Psmd3	ensembl_havana	15	ensembl_havana | havana	2059.36	1616.43	2196.9	1682.89	1921.31	1422.78	1955.64	608.511	952.695	1026.86	957.77	3800.53	3140.05	2346.18	2617.69
4	148642886	148666859	23973	+	ENSMUSG00000017264	protein_coding	ENSMUSG00000017264	Exosc10	ensembl_havana	17	ensembl_havana | havana	1287.8	988.976	1073.94	1233.63	1099.47	1023.68	1230.38	437.085	676.667	741.97	664.436	2081.3	1821.66	1490.37	1657.68
11	76011813	76134552	122739	-	ENSMUSG00000017286	protein_coding	ENSMUSG00000017286	Glod4	ensembl_havana	16	ensembl_havana | havana	1070.8	889.279	917.673	997.749	676.478	737.471	848.472	364.007	624.441	492.362	395.764	1915.01	1306.39	1152.31	1354.26
11	75937052	76070474	133422	-	ENSMUSG00000017288	protein_coding	ENSMUSG00000017288	Vps53	ensembl_havana	16	ensembl_havana | havana	822.17	819.858	741.024	871.184	784.813	729.191	1039.53	277.33	498.456	494.646	485.707	1086.5	801.977	751.8	767.499
11	77419988	77498642	78654	-	ENSMUSG00000017291	protein_coding	ENSMUSG00000017291	Taok1	ensembl_havana	14	ensembl | havana	4519.1	4523.31	4029.7	5347.95	3742.66	5542.14	4725.6	1531.17	2923.77	2919.92	3385.01	2530.64	2963.01	3157.86	3038.52
2	164587903	164610528	22625	+	ENSMUSG00000017299	protein_coding	ENSMUSG00000017299	Dnttip1	ensembl_havana	14	ensembl_havana | havana	306.994	327.207	420.787	367.161	333.175	349.494	410.977	181.297	321.585	338.112	264.683	619.042	358.687	299.661	331.539
2	164634685	164646803	12118	-	ENSMUSG00000017307	protein_coding	ENSMUSG00000017307	Acot8	ensembl_havana	17	ensembl_havana | havana	350.146	410.418	358.069	293.178	316.273	297.799	400.57	98.2144	218.679	190.481	166.243	264.432	233.203	219.934	210.818
11	101932335	101946447	14112	+	ENSMUSG00000017309	protein_coding	ENSMUSG00000017309	Cd300lg	ensembl_havana	12	ensembl_havana | havana	933.514	807.602	910.015	946.691	206.075	854.321	904.656	113.984	180.891	154.446	156.9	165.199	49.3525	37.017	66.5688
11	101947841	101979342	31501	-	ENSMUSG00000017314	protein_coding	ENSMUSG00000017314	Mpp2	ensembl_havana	13	ensembl_havana | havana	8.99775	18.3824	9.29449	5.66316	14.8078	9.70818	2.54475	138.216	242.528	250.454	312.434	78.061	48.4712	68.7458	103.116
11	78457994	78588200	130206	-	ENSMUSG00000017376	protein_coding	ENSMUSG00000017376	Nlk	ensembl_havana	16	ensembl_havana | havana	388.028	447.306	329.532	452.108	404.746	422.845	521.674	197.452	383.222	333.938	354.729	418.443	553.454	560.543	566.488
11	78049325	78056416	7091	-	ENSMUSG00000017386	protein_coding	ENSMUSG00000017386	Traf4	ensembl_havana	11	ensembl_havana | havana	92.227	128.677	175.75	104.768	102.421	160.724	108.152	166.937	277.367	278.629	334.265	403.013	435.361	348.136	357.644
11	78213794	78218608	4814	+	ENSMUSG00000017390	protein_coding	ENSMUSG00000017390	Aldoc	ensembl_havana	16	ensembl_havana | havana	97.8505	465.688	176.595	131.196	76.5069	195.242	80.1597	25.1302	44.2179	36.5244	36.8373	24.5075	26.4388	32.6102	43.7266
11	97917536	97921319	3783	+	ENSMUSG00000017404	protein_coding	ENSMUSG00000017404	Rpl19	ensembl_havana	13	ensembl_havana | havana	3413.7	4253.61	3579.16	4273.24	2992.47	4235.93	4228.53	658.002	2371.03	1922.87	1809.1	2164.61	5809.71	4146.96	2979.78
11	78056932	78067502	10570	-	ENSMUSG00000017405	protein_coding	ENSMUSG00000017405	Nek8	ensembl_havana	15	ensembl_havana | havana	152.962	178.922	158.851	217.088	144.376	173.669	164.137	86.1608	124.614	158.62	158.264	202.414	185.953	188.61	157.938
11	97814064	97877271	63207	-	ENSMUSG00000017417	protein_coding	ENSMUSG00000017417	Plxdc1	ensembl_havana	15	ensembl_havana | havana	678.205	410.541	768.062	396.422	182.629	486.487	393.165	55.6455	87.0959	68.8747	96.8684	382.135	118.093	112.814	254.528
2	15054206	15087268	33062	+	ENSMUSG00000017418	protein_coding	ENSMUSG00000017418	Arl5b	ensembl_havana	15	ensembl | havana	442.014	437.502	485.004	491.752	351.685	522.085	559.846	219.889	467.638	393.42	450.234	250.521	588.702	565.831	506.448
11	80274105	80296560	22455	+	ENSMUSG00000017421	protein_coding	ENSMUSG00000017421	Zfp207	ensembl_havana	19	ensembl | ensembl_havana | havana	4582.12	4062.51	4091.2	5664.08	4425.03	5985.6	4796.9	1656.8	3518.68	3086.83	4076.67	1996.92	6016.62	4479.92	3753.97
11	80319441	80364075	44634	+	ENSMUSG00000017428	protein_coding	ENSMUSG00000017428	Psmd11	ensembl_havana	17	ensembl_havana | havana	1151.6	773.639	1294.74	864.336	1023.3	886.274	1169.46	403.883	672.815	725.624	821.623	1974.3	1226.03	1245.32	1816.96
11	118191895	118246567	54672	-	ENSMUSG00000017466	protein_coding	ENSMUSG00000017466	Timp2	ensembl_havana	10	ensembl_havana | havana	562.36	568.63	693.707	669.196	740.388	790.676	1469.59	419.137	1192.54	835.888	955.04	220.568	119.856	156	148.148
8	123103348	123144100	40752	+	ENSMUSG00000017478	protein_coding	ENSMUSG00000017478	Zc3h18	ensembl_havana	16	ensembl_havana | havana	1588.94	1547.66	1519	1985.63	1916.86	1775.55	1674.97	894.958	1117.41	1332.06	1254.5	3446.59	2876.46	2685.45	2671.84
14	6034301	6104585	70284	-	ENSMUSG00000017485	protein_coding	ENSMUSG00000017485	Top2b	ensembl_havana	12	ensembl_havana | havana	5224.33	4379.57	4924.42	5984.09	4117.8	5185.24	4693.81	2168.37	3710.27	3555.38	3836.51	6317.48	7817.99	7005.04	7587.55
11	98932070	98945219	13149	+	ENSMUSG00000017493	protein_coding	ENSMUSG00000017493	Igfbp4	ensembl_havana	13	ensembl_havana | havana	1878.28	970.592	4400.56	3782.07	1352.45	1883.39	2292.81	800.579	1705.74	1384.8	1210.17	8079.25	7000.9	5336.69	4251.22
11	98798627	98814767	16140	+	ENSMUSG00000017499	protein_coding	ENSMUSG00000017499	Cdc6	ensembl_havana	16	ensembl_havana | havana	817.58	399.512	893.213	944.51	816.877	709.774	857.553	721.515	1357.31	1447.15	1551.15	2623.2	2388.71	1897.95	2387.18
11	79883932	79924950	41018	+	ENSMUSG00000017548	protein_coding	ENSMUSG00000017548	Suz12	ensembl_havana	16	ensembl | ensembl_havana | havana	2809.51	2160.54	2445.3	3280.88	2649.38	2375.22	2935.42	1176.62	2740.23	2808.22	2702.76	3081.59	4133.43	3980.15	3928.82
11	79980226	80026621	46395	+	ENSMUSG00000017550	protein_coding	ENSMUSG00000017550	Atad5	ensembl_havana	15	ensembl | havana	1234.94	675.249	1113.66	1410.12	963.741	1020.44	1066.25	561.839	1078.65	1289.84	1358.89	2511.51	2137.14	2110.83	2341.7
11	79937319	79971818	34499	-	ENSMUSG00000017561	protein_coding	ENSMUSG00000017561	Crlf3	ensembl_havana	17	ensembl_havana | havana	2717.35	2550.24	2762.16	2909.91	2127.4	3430.24	3040.96	1055.47	2415.93	2101.72	2469.44	1809.02	2234.08	1899.35	1709.91
11	98956504	98980133	23629	-	ENSMUSG00000017607	protein_coding	ENSMUSG00000017607	Tns4	ensembl_havana	10	ensembl_havana | havana	210.322	185.05	229.827	332.239	193.735	245.941	269.744	43.0804	66.9968	53.2213	70.9459	77.1532	97.8237	58.1695	107.685
11	78413676	78427159	13483	-	ENSMUSG00000017615	protein_coding	ENSMUSG00000017615	Tnfaip1	ensembl_havana	13	ensembl_havana	370.033	403.188	359.105	502.134	372.662	488.645	474.597	78.0832	205.01	180.535	167.814	271.398	344.587	260.881	285.201
11	76307560	76514385	206825	-	ENSMUSG00000017631	protein_coding	ENSMUSG00000017631	Abr	ensembl_havana	20	ensembl | ensembl_havana | havana	4226.66	3912.98	3311.42	4438.07	5441.87	4886.43	4882.14	1296.9	2450.75	2047.45	2058.81	2442.57	1882.45	1863.19	1799.96
11	79482038	79588850	106812	+	ENSMUSG00000017639	protein_coding	ENSMUSG00000017639	Rab11fip4	ensembl_havana	14	ensembl_havana | havana	610.722	953.436	754.544	811.719	629.331	754.002	867.76	512.477	948.675	679.354	710.824	358.536	201.816	143.661	173.601
2	164897547	164914869	17322	+	ENSMUSG00000017652	protein_coding	ENSMUSG00000017652	Cd40	ensembl_havana	17	ensembl | ensembl_havana | havana	612.971	650.738	255.176	323.744	170.29	281.537	271.016	66.4156	127.294	66.7875	110.512	13.6153	5.28777	6.1695	13.7054
2	165118474	165129790	11316	-	ENSMUSG00000017664	protein_coding	ENSMUSG00000017664	Slc35c2	ensembl_havana	17	ensembl_havana | havana	2199.95	1857.85	2261.1	2283.2	1367.25	2044.11	2080.34	432.599	838.801	791.015	713.551	1793.58	1351.92	1157.22	1236.09
2	165129951	165168400	38449	-	ENSMUSG00000017670	protein_coding	ENSMUSG00000017670	Elmo2	ensembl_havana	17	ensembl_havana | havana	4141.24	3455.89	2886.38	4338.91	1897.86	4121.6	3691.17	541.199	1161.72	946.507	869.088	1531.28	1426.82	1397.84	1213.24
11	79130198	79145498	15300	-	ENSMUSG00000017677	protein_coding	ENSMUSG00000017677	Wsb1	ensembl_havana	12	ensembl_havana | havana	2437.29	3038.01	2855.12	3876.36	2173.05	2955.6	2917.57	884.044	1701.71	1469.33	1433.92	1871.63	2543.41	2179.6	1802.56
2	163444234	163460934	16700	+	ENSMUSG00000017679	protein_coding	ENSMUSG00000017679	Ttpal	ensembl_havana	17	ensembl | havana	878.404	927.698	744.403	812.662	842.814	1244.8	753.248	360.798	767.783	727.359	935.94	647.181	901.559	1033.83	997.885
11	80099845	80158734	58889	+	ENSMUSG00000017686	protein_coding	ENSMUSG00000017686	Rhot1	ensembl_havana	18	ensembl | ensembl_havana | havana	804.175	756.131	713.987	892.892	734.22	893.153	883.029	277.33	498.457	472.731	487.072	824.179	1251.44	1109.63	1098.39
11	80191738	80246782	55044	+	ENSMUSG00000017692	protein_coding	ENSMUSG00000017692	Rhbdl3	ensembl_havana	9	ensembl_havana | havana	8.99775	6.12748	15.2092	29.2597	13.5738	8.62949	7.63426	17.9502	18.7591	25.0453	31.3799	38.1228	50.2338	32.6102	16.9685
2	163568504	163592160	23656	-	ENSMUSG00000017697	protein_coding	ENSMUSG00000017697	Ada	ensembl_havana	4	ensembl_havana | havana	219.32	365.198	282.215	334.126	660.181	270.75	545.849	162.449	349.723	384.028	296.063	298.629	317.266	287.322	245.391
2	163465192	163487052	21860	-	ENSMUSG00000017707	protein_coding	ENSMUSG00000017707	Serinc3	ensembl_havana	10	ensembl_havana | havana	20208.9	13065	19398.4	23573	20929.5	26625.2	21205.3	8795.58	18138.8	17303.1	19972.5	12773.7	23772.4	19734.2	18118.9
11	117758778	117764308	5530	-	ENSMUSG00000017713	protein_coding	ENSMUSG00000017713	Tha1	ensembl_havana	10	ensembl_havana | havana	46.1135	85.7847	64.2165	46.2491	50.5933	55.013	61.074	26.9252	20.099	28.176	15.0078	148.861	93.4172	103.119	92.6743
11	117877118	117914838	37720	+	ENSMUSG00000017715	protein_coding	ENSMUSG00000017715	Pgs1	ensembl_havana	12	ensembl_havana | havana	1498.12	1134.81	1818.34	1456.37	1668.35	1807.87	1978.53	497.219	1063.91	913.108	1047.82	1141.87	920.074	882.238	819.059
11	117740077	117746570	6493	+	ENSMUSG00000017716	protein_coding	ENSMUSG00000017716	Birc5	ensembl_havana	16	ensembl_havana	2303.43	825.982	2373.46	2084.03	1810.27	1805.73	2098.12	1385.75	2139.89	2351.1	2320.77	2491.61	2065.74	1552.05	2036.24
11	117716750	117730735	13985	+	ENSMUSG00000017718	protein_coding	ENSMUSG00000017718	Afmid	ensembl_havana	16	ensembl_havana | havana	99.5907	214.348	117.687	109.355	98.0236	96.0604	115.619	141.389	380.472	318.666	294.781	95.7299	62.5718	56.2211	77.4341
2	164339440	164350222	10782	+	ENSMUSG00000017721	protein_coding	ENSMUSG00000017721	Pigt	ensembl_havana	16	ensembl_havana | havana	1634.17	1384.36	1764.07	1692.15	1353.94	1631.21	1942.71	373.066	728.378	684.972	747.529	2145.4	1900.71	1622.21	1532.11
2	164328026	164335240	7214	+	ENSMUSG00000017734	protein_coding	ENSMUSG00000017734	Dbndd2	ensembl_havana	16	ensembl_havana | havana	30.2132	109.684	10.2625	46.0163	37.617	55.0669	39.17	29.1755	30.6998	36.4428	25.2993	11.3643	13.1601	11.2545	4.3516
2	164782700	164797771	15071	+	ENSMUSG00000017737	protein_coding	ENSMUSG00000017737	Mmp9	ensembl_havana	3	ensembl_havana | havana	11862.4	10226.7	11220.2	15262.1	25009.2	17805.9	40960.9	12909.9	24243.3	21111.1	19724.4	740.671	12.3381	221.221	197.749
2	164802722	164841652	38930	+	ENSMUSG00000017740	protein_coding	ENSMUSG00000017740	Slc12a5	ensembl_havana	18	ensembl_havana | havana	13.4966	36.7649	23.6587	39.6421	24.6797	34.518	38.1713	31.4128	44.2179	19.8276	36.8373	31.769	14.982	16.7458	15.0106
11	100656858	100661784	4926	-	ENSMUSG00000017747	protein_coding	ENSMUSG00000017747	Ghdc	ensembl_havana	14	ensembl_havana | havana	143.964	159.314	171.526	162.344	154.248	186.613	253.203	65.5181	116.574	123.14	85.9537	106.199	71.3849	87.2543	56.7793
13	73881213	73964874	83661	+	ENSMUSG00000017756	protein_coding	ENSMUSG00000017756	Slc12a7	ensembl_havana	10	ensembl_havana | havana	438.64	387.257	400.508	337.901	401.044	392.642	408.433	96.0334	158.112	161.751	158.264	374.874	319.028	430.984	399.413
2	164674793	164682953	8160	+	ENSMUSG00000017760	protein_coding	ENSMUSG00000017760	Ctsa	ensembl_havana	17	ensembl_havana | havana	8275.86	6179.15	5461.53	5287	4678.94	6774.38	7280.51	1080.77	1949.65	1812.71	1496.64	2205.33	2142.15	1567.11	1907.19
2	164664606	164668792	4186	+	ENSMUSG00000017764	protein_coding	ENSMUSG00000017764	Zswim1	ensembl_havana	3	ensembl_havana | havana	177.706	186.275	174.061	215.2	161.652	171.511	169.226	62.8256	96.4754	122.096	81.8607	194.245	249.406	222.983	201.664
8	106670222	106692730	22508	-	ENSMUSG00000017765	protein_coding	ENSMUSG00000017765	Slc12a4	ensembl_havana	18	ensembl_havana | havana	311.413	294.119	403.757	302.979	391.173	304.189	408.433	92.4433	199.65	209.755	227.845	537.336	427.388	385.152	482.951
11	75541330	75564737	23407	+	ENSMUSG00000017774	protein_coding	ENSMUSG00000017774	Myo1c	ensembl_havana	20	ensembl_havana | havana	2342.8	2756.14	2319.38	1994.38	1862.07	2612.56	2322.08	884.946	1586.49	1516.29	1652.23	1881.63	1485.86	1267.38	1419.48
11	75570085	75597735	27650	+	ENSMUSG00000017776	protein_coding	ENSMUSG00000017776	Crk	ensembl_havana	16	ensembl_havana | havana	2007.61	2273.3	2494.26	2330.34	1907.74	2824.03	2216.49	663.257	1633.38	1338.89	1713.62	1268.95	2035.8	1702.77	1318.99
13	86192935	86195024	2089	-	ENSMUSG00000017778	protein_coding	ENSMUSG00000017778	Cox7c	ensembl_havana	15	ensembl_havana | havana	643.063	633.186	513.435	695.701	467.113	617.937	713.51	125.032	419.941	407.862	361.575	266.363	965.922	721.575	576.996
11	75478923	75519631	40708	+	ENSMUSG00000017781	protein_coding	ENSMUSG00000017781	Pitpna	ensembl_havana	18	ensembl | ensembl_havana | havana	6986.8	5387.29	7000.37	5865.09	5288.94	6224.99	6776.71	1518.58	2576.67	2416.88	2331.66	3524.49	2631.56	2122.32	2516.59
11	100978103	100983034	4931	+	ENSMUSG00000017801	protein_coding	ENSMUSG00000017801	Mlx	ensembl_havana	16	ensembl_havana | havana	757.753	736.649	688.102	796.783	884.118	749.506	1213.97	310.318	745.24	728.217	532.855	380.7	769.517	651.52	555.302
11	100987148	101010720	23572	-	ENSMUSG00000017802	protein_coding	ENSMUSG00000017802	Retreg3	ensembl_havana	15	ensembl | ensembl_havana | havana	1631.98	1718.15	1472.74	1937.76	1351.23	2185.43	2079.04	564.532	1544.96	1237.67	1352.06	1120.08	1175.64	1114.91	974.384
11	100585710	100595098	9388	-	ENSMUSG00000017830	protein_coding	ENSMUSG00000017830	Dhx58	ensembl_havana	16	ensembl_havana | havana	1664.55	688.709	1169.39	1146.79	630.542	1246.89	1110.78	197.42	396.621	291.152	238.76	233.27	327.841	193.017	283.204
17	53786262	53814709	28447	+	ENSMUSG00000017831	protein_coding	ENSMUSG00000017831	Rab5a	ensembl_havana	9	ensembl_havana | havana	1240.31	1260.23	955.902	1461.1	1465.27	1426.1	1456.49	532.84	1024.63	940.936	1004.54	583.348	974.532	863.45	753.966
11	100510070	100518434	8364	+	ENSMUSG00000017837	protein_coding	ENSMUSG00000017837	Nkiras2	ensembl_havana	13	ensembl_havana | havana	1269.78	1385.68	1071.92	1355.94	1017.13	1360.34	1685.67	329.59	686.119	632.29	600.312	419.053	549.757	427.903	374.569
12	110413554	110549497	135943	+	ENSMUSG00000017843	protein_coding	ENSMUSG00000017843	Ppp2r5c	ensembl_havana	15	ensembl_havana | havana	4164.82	4300.26	3926.52	5170.48	3726.64	4780.73	5020.78	1442.29	3297.58	3144.24	2761.43	2738.49	3670.58	3091.79	2987.12
2	162859274	162888062	28788	+	ENSMUSG00000017858	protein_coding	ENSMUSG00000017858	Ift52	ensembl_havana	13	ensembl_havana | havana	692.827	578.434	726.659	640.88	472.615	566.311	652.728	154.371	345.704	332.894	300.156	581.827	695.342	557.899	625.227
2	162896607	162926609	30002	+	ENSMUSG00000017861	protein_coding	ENSMUSG00000017861	Mybl2	ensembl_havana	12	ensembl_havana | havana	531.218	329.142	782.513	775.932	782.472	546.311	633.985	472.305	808.464	964.266	936.397	1844.34	1328.49	1197.93	1036.43
2	165436952	165613648	176696	+	ENSMUSG00000017897	protein_coding	ENSMUSG00000017897	Eya2	ensembl_havana	19	ensembl | ensembl_havana | havana	8.99775	6.12748	16.8991	21.7088	12.3398	19.4164	6.36188	19.7452	18.7591	18.784	10.9148	126.168	84.6043	100.475	64.6109
2	167140364	167191104	50740	-	ENSMUSG00000017929	protein_coding	ENSMUSG00000017929	B4galt5	ensembl_havana	14	ensembl_havana | havana	1800.68	1616.43	1551.34	1581.91	969.91	2247.98	1851.31	322.205	872.299	704.4	731.289	535.534	507.626	447.729	446.403
6	23262772	23839421	576649	-	ENSMUSG00000017978	protein_coding	ENSMUSG00000017978	Cadps2	ensembl_havana	19	ensembl | ensembl_havana | havana	17.9955	4.90198	27.8835	25.4842	86.3788	8.62949	3.81713	17.0527	30.8185	24.0018	10.9148	22.6921	13.2194	22.0339	21.537
2	166857113	166876868	19755	+	ENSMUSG00000017999	protein_coding	ENSMUSG00000017999	Ddx27	ensembl_havana	17	ensembl_havana | havana	908.772	696.081	862.697	1069.4	1014.33	817.644	772.332	422.727	594.931	775.363	592.126	2621.39	2406.82	1995.38	2006.86
5	143608202	143696006	87804	+	ENSMUSG00000018001	protein_coding	ENSMUSG00000018001	Cyth3	ensembl_havana	19	ensembl_havana | havana	717.571	1077.21	517.957	622.947	484.955	569.546	494.954	481.065	845.499	876.587	1000.06	1925.18	1870.11	1637.55	2220.25
15	78481247	78506220	24973	+	ENSMUSG00000018008	protein_coding	ENSMUSG00000018008	Cyth4	ensembl_havana	9	ensembl_havana | havana	7328.64	7341.99	6436.1	6938.38	4571.89	7855.08	7697.91	1590.38	2854.07	2714.31	2480.37	2539.71	1702.67	1404	1532.39
15	82997634	83007003	9369	-	ENSMUSG00000018040	protein_coding	ENSMUSG00000018040	Rrp7a	ensembl_havana	10	ensembl_havana | havana	1334.19	1145.97	1544.66	1377.14	1446.66	1441.74	1234.77	377.451	707.541	709.765	527.809	2138.59	2081.86	1561.55	1678.39
15	83037695	83056794	19099	-	ENSMUSG00000018042	protein_coding	ENSMUSG00000018042	Cyb5r3	ensembl_havana	19	ensembl_havana | havana	749.063	1251.23	729.147	1042.02	804.559	806.858	641.059	453.95	736.964	1038.34	847.256	1307.98	1278.76	1036.48	1015.5
11	86101507	86148402	46895	-	ENSMUSG00000018068	protein_coding	ENSMUSG00000018068	Ints2	ensembl_havana	14	ensembl_havana | havana	563.042	558.827	627.689	809.602	582.134	607.032	659.206	262.65	423.911	540.23	532.967	1227.18	1841.65	1591.72	1623.5
5	118698744	118903504	204760	+	ENSMUSG00000018076	protein_coding	ENSMUSG00000018076	Med13l	ensembl_havana	13	ensembl_havana | havana	3674.46	3590.64	4064.27	3779.27	3408.27	4159.39	4293	1736.67	2890.23	2893.75	3791.49	4514.86	2498.46	2835.33	3278.82
13	23868182	23876892	8710	+	ENSMUSG00000018102	protein_coding	ENSMUSG00000018102	H2bc4	ensembl_havana	6	ensembl_havana	4459.66	2904.06	3865.34	6181.6	4863.97	4925.22	7322.48	2506.08	5038	4031.54	4743.53	4903.11	6557.89	4813.2	3597.88
5	139777268	139788409	11141	+	ENSMUSG00000018143	protein_coding	ENSMUSG00000018143	Mafk	ensembl_havana	11	ensembl_havana | havana	907.648	805.127	883.811	957.072	1003.19	1075.39	917.366	825.7	1357.35	1417.14	1418.87	1187.27	1453.24	1377.46	1031.81
11	98042980	98084120	41140	-	ENSMUSG00000018160	protein_coding	ENSMUSG00000018160	Med1	ensembl_havana	16	ensembl_havana | havana	1988.53	1995.11	1849.61	2232.22	1842.34	2313.77	2166.87	701.853	1306.44	1381.66	1727.26	3211.41	2821.86	2786.88	3141.15
10	128403392	128425522	22130	-	ENSMUSG00000018166	protein_coding	ENSMUSG00000018166	Erbb3	ensembl_havana	9	ensembl_havana	273.307	274.511	349.811	128.365	177.693	282.616	113.241	76.2882	85.7559	109.573	84.5894	207.86	178.022	169.22	153.369
11	98249194	98271939	22745	+	ENSMUSG00000018167	protein_coding	ENSMUSG00000018167	Stard3	ensembl_havana	11	ensembl_havana | havana	1538.61	1151.97	1513.3	1441.27	1047.65	1774.44	1425.06	316.82	691.409	478.992	558.016	506.489	578.13	528.813	504.486
11	98355728	98436858	81130	-	ENSMUSG00000018168	protein_coding	ENSMUSG00000018168	Ikzf3	ensembl_havana	9	ensembl_havana | havana	1161.84	1389.71	436.841	155.737	1340.11	213.58	272.288	440.677	660.589	699.182	1025.99	189.706	90.7734	127.797	206.233
15	78640082	78657676	17594	-	ENSMUSG00000018169	protein_coding	ENSMUSG00000018169	Mfng	ensembl_havana	13	ensembl_havana | havana	654.586	740.199	702.157	655.983	380.067	571.704	487.32	126.549	277.367	194.101	197.83	651.718	606.331	597.56	414.424
11	86474691	86574663	99972	-	ENSMUSG00000018171	protein_coding	ENSMUSG00000018171	Vmp1	ensembl_havana	10	ensembl_havana | havana	1768.06	2197.32	1177.02	1675.35	1947.23	1866.13	2236.84	487.347	1027.73	1047.73	1087.38	1241.71	2229.67	2950.78	2121.72
1	143653010	143683205	30195	+	ENSMUSG00000018189	protein_coding	ENSMUSG00000018189	Uchl5	ensembl_havana	13	ensembl_havana | havana	836.791	464.462	926.913	743.762	992.121	599.749	754.519	382.339	576.173	633.439	579.846	1340.65	1336.04	1058.51	1283.08
1	143592076	143625415	33339	+	ENSMUSG00000018196	protein_coding	ENSMUSG00000018196	Glrx2	ensembl_havana	19	ensembl_havana | havana	388.028	400.737	400.508	419.074	315.9	343.022	417.339	160.654	235.829	226.452	215.567	357.628	461.799	401.898	439.224
1	143626528	143652807	26279	-	ENSMUSG00000018199	protein_coding	ENSMUSG00000018199	Ro60	ensembl_havana	10	ensembl_havana | havana	209.198	252.452	190.96	246.347	276.412	201.714	257.02	87.0583	180.891	145.054	191.008	186.075	265.27	282.034	216.675
2	163912242	163997445	85203	+	ENSMUSG00000018209	protein_coding	ENSMUSG00000018209	Stk4	ensembl_havana	16	ensembl_havana | havana	6590.7	6019.43	6320.36	7359.42	6955.75	7298.69	8331.89	2871.17	5820.78	5139.62	5606.13	5021.21	4893.66	4393.48	4454.36
11	53215506	53224129	8623	+	ENSMUSG00000018239	protein_coding	ENSMUSG00000018239	Zcchc10	ensembl_havana	10	ensembl_havana | havana	64.109	78.4317	110.689	91.5544	117.228	99.2392	82.7044	28.7203	76.3764	72.0053	62.7599	164.291	214.155	146.305	125.959
11	70416193	70418685	2492	+	ENSMUSG00000018286	protein_coding	ENSMUSG00000018286	Psmb6	ensembl_havana	7	ensembl_havana | havana	3040.14	1894.61	2705.56	2219.96	2859.15	1846.71	2439.15	815.834	1366.74	1312.79	1068.28	3040.79	2830.72	1961.02	2340.35
11	70554597	70560243	5646	-	ENSMUSG00000018287	protein_coding	ENSMUSG00000018287	Spag7	ensembl_havana	13	ensembl_havana | havana	890.779	707.112	729.195	899.495	894.639	686.045	688.354	376.954	631.11	559.346	416.125	1454.11	1015.25	735.932	702.891
11	70542676	70545471	2795	-	ENSMUSG00000018293	protein_coding	ENSMUSG00000018293	Pfn1	ensembl_havana	5	ensembl_havana | havana	16384.6	19831.1	12842.8	16769.7	19470.4	15525.2	25842.5	7428.44	15684.5	13963.5	11563.2	10527.9	12984.7	9670.51	8117.2
2	163895460	163913090	17630	-	ENSMUSG00000018322	protein_coding	ENSMUSG00000018322	Tomm34	ensembl_havana	11	ensembl_havana | havana	1052.74	1013.48	976.769	1125.07	979.781	1062.51	1131.15	322.205	692.749	594.826	592.126	1188.17	1297.27	1084.08	1088.61
2	163836880	163860509	23629	+	ENSMUSG00000018326	protein_coding	ENSMUSG00000018326	Ywhab	ensembl_havana	10	ensembl_havana | havana	4677.71	4191.19	4326.98	4287.02	4191.84	4576.87	6748.71	1246.64	3238.63	2828.04	3132.53	3961.09	3771.96	3256.6	3726.56
11	78904266	79037234	132968	-	ENSMUSG00000018334	protein_coding	ENSMUSG00000018334	Ksr1	ensembl_havana	19	ensembl_havana | havana	504.999	471.815	580.482	470.987	1253.73	685.992	774.875	253.995	440.838	371.506	497.987	634.463	460.918	459.186	411.813
11	54793279	54801204	7925	+	ENSMUSG00000018339	protein_coding	ENSMUSG00000018339	Gpx3	ensembl_havana	13	ensembl_havana | havana	97.8506	93.1377	143.642	124.589	228.287	182.298	268.471	59.2355	186.251	131.488	118.698	80.784	58.1655	40.5424	33.9371
11	54869934	54924272	54338	-	ENSMUSG00000018340	protein_coding	ENSMUSG00000018340	Anxa6	ensembl_havana	14	ensembl_havana | havana	5787.87	6248.81	4934.64	6005.64	3049.14	5498.19	4027.04	919.948	1590.5	1364.97	1251.1	2387.23	2168.88	1701.03	1931.79
6	67268302	67353173	84871	-	ENSMUSG00000018341	protein_coding	ENSMUSG00000018341	Il12rb2	ensembl_havana	13	ensembl_havana | havana	169.62	210.191	53.4064	124.646	32.0626	125.228	105.452	12.2676	33.8464	28.7086	40.1331	63.8479	27.3022	62.2108	85.2062
11	65698001	65720066	22065	+	ENSMUSG00000018347	protein_coding	ENSMUSG00000018347	Zkscan6	ensembl_havana	17	ensembl_havana | havana	574.735	509.804	425.859	554.988	600.95	537.187	690.903	218.992	411.361	365.245	371.102	506.486	432.718	407.188	368.737
11	106879455	106890368	10913	-	ENSMUSG00000018362	protein_coding	ENSMUSG00000018362	Kpna2	ensembl_havana	15	ensembl_havana | havana	819.115	447.37	772.867	920.828	1134.74	832.099	1069.98	454.019	944.372	837.331	959.065	542.082	1216.18	907.791	942.763
11	106710892	106811542	100650	-	ENSMUSG00000018363	protein_coding	ENSMUSG00000018363	Smurf2	ensembl_havana	17	ensembl | ensembl_havana | havana	1066.23	1084.57	1014.79	1154.34	932.893	1405.53	1267.29	390.416	916.518	686.658	899.102	648.995	865.431	786.169	776.633
11	106680078	106710757	30679	+	ENSMUSG00000018372	protein_coding	ENSMUSG00000018372	Cep95	ensembl_havana	14	ensembl | ensembl_havana | havana	209.198	253.678	188.425	222.751	264.072	268.593	257.02	123.856	238.509	199.319	240.125	304.074	254.694	318.17	341.982
11	87959105	87975556	16451	+	ENSMUSG00000018377	protein_coding	ENSMUSG00000018377	Vezf1	ensembl_havana	11	ensembl_havana | havana	1125.84	1373.79	1022.4	1496.94	1082.2	1572.74	1570.13	563.637	1262.21	1088.43	1302.95	1061.99	1912.4	1908.11	1457.98
11	87988884	88084967	96083	+	ENSMUSG00000018378	protein_coding	ENSMUSG00000018378	Cuedc1	ensembl_havana	14	ensembl_havana | havana	33.7416	55.1473	40.5578	39.6421	35.7855	17.259	49.6227	33.2078	38.8582	36.5245	47.7521	259.598	111.043	148.068	103.769
11	87938199	87944582	6383	+	ENSMUSG00000018379	protein_coding	ENSMUSG00000018379	Srsf1	ensembl_havana	18	ensembl_havana | havana	6675.18	5574.82	5739.76	9811.46	7487.85	7920.79	7531.19	3711.22	6894	7235.99	7651.18	8964.17	18109.8	14914.7	13042.8
11	95720900	95733303	12403	-	ENSMUSG00000018381	protein_coding	ENSMUSG00000018381	Abi3	ensembl_havana	16	ensembl_havana | havana	1100.06	1532.67	741.425	532.902	648.268	1091.03	1669.27	165.005	383.682	346.35	378.121	128.1	107.111	77.08	100.996
11	53458206	53492795	34589	+	ENSMUSG00000018395	protein_coding	ENSMUSG00000018395	Kif3a	ensembl_havana	20	ensembl_havana | havana	70.8573	63.7258	49.8523	64.1825	125.866	44.2262	50.895	59.2356	52.2575	58.4391	66.8529	299.536	240.594	226.509	242.128
11	53410084	53440393	30309	+	ENSMUSG00000018398	protein_coding	ENSMUSG00000018398	Septin8	ensembl_havana	19	ensembl_havana | havana	152.962	136.03	177.44	173.67	124.632	155.331	160.319	409.263	770.462	844.234	1166.51	3385.68	2844.86	2783.32	3782.77
11	87482988	87507129	24141	+	ENSMUSG00000018401	protein_coding	ENSMUSG00000018401	Mtmr4	ensembl_havana	18	ensembl_havana | havana	1939.02	3068.65	1558.09	2268.13	1452.4	2328.88	2099.44	498.116	1017.01	944.417	1072.38	1616.58	1655.07	1546.79	1802.62
11	84703887	84710342	6455	-	ENSMUSG00000018405	protein_coding	ENSMUSG00000018405	Mrm1	ensembl_havana	8	ensembl_havana | havana	303.674	345.59	326.997	289.765	228.287	264.278	282.467	140.011	249.228	299.5	384.745	406.643	395.701	457.424	458.15
11	104122216	104222917	100701	+	ENSMUSG00000018411	protein_coding	ENSMUSG00000018411	Mapt	ensembl_havana	18	ensembl_havana | havana	16.8708	6.12748	10.9844	4.7193	28.3816	33.4393	7.63426	37.6953	24.1189	30.2631	30.0156	20.8768	14.1007	20.2712	24.1475
11	104224055	104359688	135633	-	ENSMUSG00000018412	protein_coding	ENSMUSG00000018412	Kansl1	ensembl_havana	17	ensembl | havana	1990.72	2066.17	1856.13	2072.72	1612.81	2271.7	2394.45	606.714	1278.3	1051.83	1500.52	2156.42	1789.92	1818.19	1857.75
11	60307971	60341754	33783	+	ENSMUSG00000018415	protein_coding	ENSMUSG00000018415	Gid4	ensembl_havana	15	ensembl_havana | havana	692.827	519.61	653.149	806.999	620.693	681.73	634.916	252.2	537.314	539.517	459.784	1520.37	1650.67	1649.89	1567.64
1	51788924	51955231	166307	-	ENSMUSG00000018417	protein_coding	ENSMUSG00000018417	Myo1b	ensembl_havana	15	ensembl_havana | havana	39.3652	91.9122	72.666	117.039	61.6991	52.8556	96.7006	86.1608	104.515	80.3538	69.5816	38.1228	61.6906	39.661	61.3478
11	86659672	86698573	38901	-	ENSMUSG00000018425	protein_coding	ENSMUSG00000018425	Dhx40	ensembl_havana	19	ensembl_havana | havana	1517.25	1194.86	1258.98	1344.06	1305.55	1545.76	1463.23	457.729	984.853	797.276	889.553	767.903	824.892	701.56	815.794
11	86827251	86884534	57283	-	ENSMUSG00000018427	protein_coding	ENSMUSG00000018427	Ypel2	ensembl_havana	9	ensembl_havana | havana	255.311	540.444	421.632	432.288	169.056	459.52	291.374	96.9309	160.792	118.965	174.636	251.429	301.403	312.882	225.812
11	88721618	88755413	33795	-	ENSMUSG00000018428	protein_coding	ENSMUSG00000018428	Akap1	ensembl_havana	16	ensembl_havana | havana	294.676	175.246	382.763	420.961	393.641	363.517	320.639	89.7508	132.654	176.361	159.628	1079.24	1081.35	959.789	905.851
11	107057489	107080208	22719	-	ENSMUSG00000018433	protein_coding	ENSMUSG00000018433	Nol11	ensembl_havana	15	ensembl | ensembl_havana | havana	701.822	560.051	664.132	901.391	684.858	683.888	629.825	210.017	420.74	493.603	424.312	768.811	1746.71	1472.74	1418.83
11	70897990	70910668	12678	-	ENSMUSG00000018442	protein_coding	ENSMUSG00000018442	Derl2	ensembl_havana	14	ensembl_havana | havana	966.087	982.081	974.949	1159.66	874.048	1092.97	1210.72	317.308	635.099	624.059	645.425	534.115	771.24	707.145	677.722
11	70868662	70873853	5191	-	ENSMUSG00000018446	protein_coding	ENSMUSG00000018446	C1qbp	ensembl_havana	9	ensembl_havana | havana	889.652	670.348	908.33	924.042	888.466	626.716	885.575	255.79	439.499	626.134	413.396	2486.13	3092.46	2352.36	2492.45
11	70861039	70868660	7621	+	ENSMUSG00000018449	protein_coding	ENSMUSG00000018449	Rpain	ensembl_havana	13	ensembl_havana | havana	449.888	280.639	575.414	304.867	336.877	303.111	327.001	163.347	215.73	252.54	241.489	567.303	409.802	334.034	428.129
11	69217084	69223869	6785	+	ENSMUSG00000018470	protein_coding	ENSMUSG00000018470	Kcnab3	ensembl_havana	9	ensembl_havana | havana	22.4944	19.6079	24.5037	21.7088	8.63788	24.8098	15.2685	11.6676	18.7591	2.08711	2.72869	11.7999	9.69424	9.69492	9.78954
11	69234099	69260233	26134	-	ENSMUSG00000018474	protein_coding	ENSMUSG00000018474	Chd3	ensembl_havana	19	ensembl | havana	1663.45	1872.54	1343.47	1750.86	670.053	1912.52	847.399	508.888	694.088	726.313	847.254	3132.42	1977.62	2084.43	1654.44
11	69289334	69304502	15168	-	ENSMUSG00000018476	protein_coding	ENSMUSG00000018476	Kdm6b	ensembl_havana	8	ensembl_havana | havana	977.33	893.2	1351.88	602.964	973.454	935.052	1741.6	312.333	553.154	523.865	877.273	1250	209.748	498.571	543.646
11	85078088	85125957	47869	-	ENSMUSG00000018481	protein_coding	ENSMUSG00000018481	Appbp2	ensembl_havana	10	ensembl_havana	1642.09	1386.04	1740.61	1546.99	1431.42	1604.01	2217.75	586.073	1159.04	1016.42	1221.09	1728.23	1830.45	1752.14	1958.56
11	62139810	62157280	17470	+	ENSMUSG00000018500	protein_coding	ENSMUSG00000018500	Adora2b	ensembl_havana	3	ensembl_havana	407.148	252.452	419.942	312.418	183.863	569.547	379.168	37.6953	105.855	52.1778	88.6824	96.2147	69.6223	85.4916	63.9583
11	62207252	62349368	142116	-	ENSMUSG00000018501	protein_coding	ENSMUSG00000018501	Ncor1	ensembl_havana	18	ensembl | ensembl_havana | havana	5893.53	5218.15	4646.41	6748.56	6253.82	6569.2	6752.54	2986.9	4869.35	4622.94	5352.33	8740.14	6466.96	6769.7	7521.69
11	62465312	62491342	26030	+	ENSMUSG00000018507	protein_coding	ENSMUSG00000018507	Trpv2	ensembl_havana	17	ensembl_havana | havana	2081.86	2074.76	1673.02	1841.48	1192.02	1985.86	1866.57	425.42	793.241	805.623	623.506	980.299	767.605	683.935	788.38
11	62415772	62430088	14316	-	ENSMUSG00000018509	protein_coding	ENSMUSG00000018509	Cenpv	ensembl_havana	9	ensembl_havana | havana	127.093	82.1082	156.316	33.979	171.524	69.0359	62.3464	41.2854	89.7757	79.3102	115.969	330.398	326.959	391.321	324.36
11	97579649	97591324	11675	-	ENSMUSG00000018537	protein_coding	ENSMUSG00000018537	Pcgf2	ensembl_havana	17	ensembl | ensembl_havana | havana	30.3674	20.8334	28.7284	19.8211	40.7214	31.2819	17.8133	17.0527	9.37955	14.6098	12.2791	84.4148	31.7266	45.8305	45.0319
11	97636307	97657383	21076	-	ENSMUSG00000018541	protein_coding	ENSMUSG00000018541	Cwc25	ensembl_havana	11	ensembl_havana | havana	500.5	498.776	544.151	496.472	533.081	560.915	622.19	226.172	361.782	426.814	375.195	502.857	494.408	433.627	453.583
11	97605983	97635531	29548	-	ENSMUSG00000018547	protein_coding	ENSMUSG00000018547	Pip4k2b	ensembl_havana	9	ensembl_havana | havana	1503.75	1600.5	1341.79	1937.74	1737.45	1827.3	1832.22	640.821	1183.16	1050.86	1098.3	2110.37	2156.53	1916.95	1786.26
11	87017903	87111510	93607	+	ENSMUSG00000018548	protein_coding	ENSMUSG00000018548	Trim37	ensembl_havana	16	ensembl_havana | havana	1011.12	662.993	997.049	1234.57	840.342	853.24	968.279	450.549	765.103	845.28	814.514	2789.33	2707.34	2273.9	2471.52
11	69871982	69881428	9446	+	ENSMUSG00000018559	protein_coding	ENSMUSG00000018559	Ctdnep1	ensembl_havana	17	ensembl_havana | havana	812.048	810.052	934.517	618.229	702.136	697.911	1005.18	132.831	304.165	296.37	387.474	1002.99	609.857	561.423	674.169
11	69859048	69873344	14296	-	ENSMUSG00000018565	protein_coding	ENSMUSG00000018565	Elp5	ensembl_havana	18	ensembl_havana | havana	512.872	512.258	424.166	474.762	480.019	410.98	491.136	133.729	316.225	394.464	311.07	714.348	826.653	685.694	684.615
11	69881969	69885778	3809	+	ENSMUSG00000018567	protein_coding	ENSMUSG00000018567	Gabarap	ensembl_havana	15	ensembl_havana | havana	4955.56	4308.87	3783.64	3884.91	5492.43	4033.2	5464.95	2202.49	3976.97	3360.2	2861.02	1611.14	1986.43	1571.46	1843.03
11	69788178	69791814	3636	-	ENSMUSG00000018570	protein_coding	ENSMUSG00000018570	2810408A11Rik	ensembl_havana	18	ensembl_havana | havana	32.6169	33.0884	39.7128	48.1368	30.8496	33.4393	41.9884	20.6427	33.4984	30.2631	20.4652	105.292	74.9101	67.8645	52.8635
11	69886603	69890836	4233	+	ENSMUSG00000018572	protein_coding	ENSMUSG00000018572	Phf23	ensembl_havana	11	ensembl_havana | havana	1200.07	1129.9	1168.58	1096.76	1422.78	1083	1441.6	461.32	858.901	793.101	784.499	1501.32	1411.84	983.589	1030.51
11	69901009	69906238	5229	-	ENSMUSG00000018574	protein_coding	ENSMUSG00000018574	Acadvl	ensembl_havana	15	ensembl_havana | havana	1033.4	818.84	990.077	1060.25	1274.69	899.568	1178.56	345.625	625.948	642.199	567.44	1333.74	1348.57	1015.61	1118.13
11	55360511	55395665	35154	+	ENSMUSG00000018583	protein_coding	ENSMUSG00000018583	G3bp1	ensembl_havana	6	ensembl_havana | havana	3875.28	3897.22	3384.77	5471.13	4387.6	3699	4490.93	1290.29	2931.76	3119.17	2579.85	8521.34	10675.3	9075.12	8086.91
11	55337467	55352066	14599	-	ENSMUSG00000018585	protein_coding	ENSMUSG00000018585	Atox1	ensembl_havana	10	ensembl_havana | havana	899.776	1737.75	715.676	983.502	787.281	1078.69	1165.5	137.319	514.536	387.159	353.365	400.289	727.068	485.627	393.539
11	55285326	55314010	28684	-	ENSMUSG00000018593	protein_coding	ENSMUSG00000018593	Sparc	ensembl_havana	14	ensembl_havana | havana	64.109	84.5592	78.5807	83.0596	44.4234	49.6196	63.6188	72.6982	147.393	175.317	148.714	37.2151	91.6547	7.93221	193.833
11	60619224	60623778	4554	+	ENSMUSG00000018599	protein_coding	ENSMUSG00000018599	Mief2	ensembl_havana	6	ensembl_havana | havana	323.919	371.325	354.036	324.688	359.089	235.154	469.507	136.421	235.829	198.276	169.179	298.628	172.734	177.153	178.17
11	83969746	84020427	50681	-	ENSMUSG00000018651	protein_coding	ENSMUSG00000018651	Tada2a	ensembl_havana	15	ensembl_havana | havana	158.585	96.8142	105.619	185.94	169.056	130.521	152.685	59.2355	73.6965	90.7893	106.419	377.597	361.331	355.187	501.876
11	11635003	11722927	87924	+	ENSMUSG00000018654	protein_coding	ENSMUSG00000018654	Ikzf1	ensembl_havana	18	ensembl | ensembl_havana | havana	7605.29	6844.31	7547.9	7006.41	6624.19	7308.32	9915.26	2477.11	5421.37	5271.05	5934.79	6829.15	6241.34	6239.91	7055.88
11	96828651	96834813	6162	-	ENSMUSG00000018659	protein_coding	ENSMUSG00000018659	Pnpo	ensembl_havana	13	ensembl_havana | havana	786.837	814.766	897.894	852.45	728.665	782.941	810.253	1166.02	2201.08	2366.71	2356.38	815.804	772.932	612.564	734.652
11	113539995	113557881	17886	+	ENSMUSG00000018661	protein_coding	ENSMUSG00000018661	Cog1	ensembl_havana	18	ensembl_havana | havana	929.685	880.298	802.703	1023.68	990.6	916.153	1138.6	396.583	619.869	622.972	640.174	1029.91	965.544	994.844	973.391
11	96679953	96699467	19514	+	ENSMUSG00000018666	protein_coding	ENSMUSG00000018666	Cbx1	ensembl_havana	14	ensembl_havana | havana	1246.19	1045.35	1104.35	1620.6	1121.69	1281.48	1212.57	590.56	966.094	1007.03	1045.09	2329.12	3042.22	2351.45	1972.9
11	96798252	96807323	9071	-	ENSMUSG00000018669	protein_coding	ENSMUSG00000018669	Cdk5rap3	ensembl_havana	15	ensembl_havana | havana	1149.44	857.847	1086.61	928.755	897.106	719.485	921.2	263.815	344.364	377.767	276.962	1557.54	826.654	829.357	818.411
11	96740696	96752030	11334	+	ENSMUSG00000018672	protein_coding	ENSMUSG00000018672	Copz2	ensembl_havana	16	ensembl_havana | havana	26.9933	31.8629	20.2789	22.6526	16.0418	25.8885	11.4514	10.7701	17.4192	10.4356	5.45738	24.5075	21.1511	38.7797	20.2317
11	102293811	102298773	4962	-	ENSMUSG00000018677	protein_coding	ENSMUSG00000018677	Slc25a39	ensembl_havana	10	ensembl_havana | havana	920.018	921.574	1022.39	999.549	1063.69	746.451	1076.43	1514.99	2263.15	2475.31	2649.57	1670.15	1629.52	1255.93	1279.81
11	96844167	96873786	29619	-	ENSMUSG00000018678	protein_coding	ENSMUSG00000018678	Sp2	ensembl_havana	14	ensembl_havana | havana	488.127	375.002	492.607	334.125	360.322	368.911	664.18	157.961	243.868	293.076	417.489	718.474	228.255	334.914	383.75
11	84313681	84404349	90668	-	ENSMUSG00000018697	protein_coding	ENSMUSG00000018697	Aatf	ensembl_havana	15	ensembl_havana | havana	614.094	439.952	534.858	632.385	614.522	476.778	519.13	225.275	278.706	294.282	326.078	1686.5	1311.35	1088.48	1352.9
12	110567886	110633380	65494	+	ENSMUSG00000018707	protein_coding	ENSMUSG00000018707	Dync1h1	ensembl_havana	14	ensembl_havana | havana	15333.9	12837.4	13166.9	13895.2	10842.7	14010.8	13800	3078.99	4428.32	4695.72	6013.78	16161.7	9784.79	9409.69	11611.9
11	83185468	83193413	7945	-	ENSMUSG00000018733	protein_coding	ENSMUSG00000018733	Pex12	ensembl_havana	11	ensembl_havana | havana	141.715	149.51	174.061	160.456	122.164	108.947	137.417	44.8754	80.3962	88.7022	98.2328	225.106	255.576	166.576	231.033
11	68712260	68762685	50425	-	ENSMUSG00000018736	protein_coding	ENSMUSG00000018736	Ndel1	ensembl_havana	15	ensembl_havana | havana	1240.56	1223.05	1150.82	1379.92	1669.58	1640.68	2000.18	727.88	1433.73	1148.95	1152.87	623.581	720.018	630.171	689.185
11	68858957	68865192	6235	+	ENSMUSG00000018740	protein_coding	ENSMUSG00000018740	Slc25a35	ensembl_havana	15	ensembl_havana | havana	138.147	78.6525	93.0806	59.817	33.3715	54.7792	51.8122	27.775	31.7064	19.8028	30.1875	40.4252	53.5009	71.4252	46.467
11	69656738	69674850	18112	+	ENSMUSG00000018750	protein_coding	ENSMUSG00000018750	Zbtb4	ensembl_havana	15	ensembl_havana | havana	425.144	803.927	361.64	247.291	373.896	326.842	232.845	147.191	233.149	217.06	293.334	271.398	163.04	257.356	235.602
11	69573403	69586925	13522	-	ENSMUSG00000018752	protein_coding	ENSMUSG00000018752	Tnfsfm13	ensembl_havana	20	ensembl_havana | havana	250.042	196.456	145.744	229.144	129.379	207.489	261.378	40.9303	88.7528	49.9166	77.747	63.1486	40.0483	69.3554	61.4901
11	69547523	69553469	5946	-	ENSMUSG00000018761	protein_coding	ENSMUSG00000018761	Mpdu1	ensembl_havana	15	ensembl_havana | havana	875.032	800.25	798.481	817.383	686.095	651.527	908.476	203.734	456.918	432.032	298.791	526.457	694.46	537.627	510.362
11	69523816	69544124	20308	+	ENSMUSG00000018765	protein_coding	ENSMUSG00000018765	Fxr2	ensembl_havana	6	ensembl_havana | havana	1047.11	1183.83	1189.7	1187.37	1190.79	1305.21	1028.08	485.552	852.199	836.931	819.971	1814.46	1677.1	1351.12	1215.86
2	73738791	73741671	2880	-	ENSMUSG00000018770	protein_coding	ENSMUSG00000018770	Atp5g3	ensembl_havana	10	ensembl_havana | havana	1519.49	1490.2	1556.41	1881.13	1578.26	1498.3	1884.4	399.391	1113.49	1175.05	864.995	1194.51	3414.19	2424.61	1951.36
11	69555039	69556980	1941	-	ENSMUSG00000018774	protein_coding	ENSMUSG00000018774	Cd68	ensembl_havana	14	ensembl | havana	2342.8	2446.09	1386.58	2395.53	1540.01	2265.22	2229.22	429.008	909.818	740.923	764.034	196.968	245.881	198.305	231.686
8	46924074	46989089	65015	+	ENSMUSG00000018796	protein_coding	ENSMUSG00000018796	Acsl1	ensembl_havana	14	ensembl_havana | havana	2422.63	2751.34	2354.85	2974.01	3637.13	3072.57	3453.62	2591.85	4266.33	4154.16	4007.81	2227.83	2068.65	2074.83	2076.4
11	110160195	110228543	68348	-	ENSMUSG00000018800	protein_coding	ENSMUSG00000018800	Abca5	ensembl_havana	15	ensembl_havana | havana	73.1067	60.0493	98.0146	43.4176	20.9777	83.0589	44.5332	35.9003	24.1189	18.784	21.8295	31.769	16.7446	23.7966	28.0633
11	75239259	75296532	57273	+	ENSMUSG00000018809	protein_coding	ENSMUSG00000018809	Smyd4	ensembl_havana	3	ensembl_havana | havana	190.078	181.373	228.983	265.224	119.696	201.714	197.218	51.158	103.175	100.181	122.791	241.444	271.439	251.187	193.833
7	142014546	142048605	34059	+	ENSMUSG00000018819	protein_coding	ENSMUSG00000018819	Lsp1	ensembl_havana	11	ensembl_havana | havana	17447.9	19563.5	12681.9	14584.4	10512.1	16002.2	14801	5347.39	8897.15	6749.72	6613	2701.26	1165.96	1040	1377.06
19	42152390	42183030	30640	+	ENSMUSG00000018820	protein_coding	ENSMUSG00000018820	Zfyve27	ensembl_havana	14	ensembl_havana | havana	1098.85	1460.79	1393.33	1483.75	1250.02	1542.52	1814.41	529.529	1251.5	928.764	967.319	1158.21	796.69	867.255	672.215
19	42111712	42117499	5787	-	ENSMUSG00000018821	protein_coding	ENSMUSG00000018821	Avpi1	ensembl_havana	4	ensembl_havana | havana	147.338	365.198	146.177	101.937	91.3147	118.656	105.607	12.5651	42.878	37.568	19.1008	88.9532	73.1475	58.1695	62.653
11	82767260	82781441	14181	-	ENSMUSG00000018841	protein_coding	ENSMUSG00000018841	Rad51d	ensembl_havana	18	ensembl_havana | havana	394.778	458.335	422.477	406.804	351.686	326.842	407.16	159.757	226.449	252.54	222.388	552.779	513.794	448.609	462.719
11	35660311	35682113	21802	+	ENSMUSG00000018846	protein_coding	ENSMUSG00000018846	Pank3	ensembl_havana	9	ensembl_havana	1636.47	1784.32	1674.7	2523.88	1383.29	2420.57	2344.99	683.901	1711.1	1531.94	1704.07	1049.28	1887.73	1814.71	1444.28
11	35699208	35725334	26126	-	ENSMUSG00000018848	protein_coding	ENSMUSG00000018848	Rars	ensembl_havana	5	ensembl_havana | havana	1518.37	859.072	1310.52	1306.3	1578.26	927.67	1246.93	441.574	700.787	841.105	633.056	1845.33	2375.09	1896.67	2455.88
11	115294578	115303501	8923	+	ENSMUSG00000018858	protein_coding	ENSMUSG00000018858	Mrpl58	ensembl_havana	16	ensembl_havana | havana	718.695	447.306	485.849	546.495	461.51	487.566	640.005	153.474	276.027	275.499	242.853	569.12	518.201	441.559	472.507
11	115158850	115167877	9027	-	ENSMUSG00000018861	protein_coding	ENSMUSG00000018861	Fdxr	ensembl_havana	9	ensembl_havana | havana	418.396	319.854	321.928	417.187	325.771	461.679	446.603	75.3907	151.413	184.709	158.264	625.395	642.465	526.17	443.794
11	97206542	97220747	14205	+	ENSMUSG00000018882	protein_coding	ENSMUSG00000018882	Mrpl45	ensembl_havana	13	ensembl_havana | havana	488.128	515.934	505.282	618.228	723.114	532.871	570.024	216.299	399.301	434.119	328.807	711.625	1152.73	857.56	818.405
11	53660841	53669201	8360	+	ENSMUSG00000018899	protein_coding	ENSMUSG00000018899	Irf1	ensembl_havana	18	ensembl_havana | havana	4683.44	3119.42	3288.43	2273	6855.03	2912.47	2555.83	739.648	1641.66	1290.96	1440.85	1236.44	1049.66	1028.81	871.782
11	53755368	53782487	27119	-	ENSMUSG00000018900	protein_coding	ENSMUSG00000018900	Slc22a5	ensembl_havana	8	ensembl_havana | havana	172.736	444.155	227.078	256.367	176.879	229.201	216.519	59.1722	97.5236	125.166	104.139	258.604	364.802	353.246	339.547
7	99184673	99255979	71306	+	ENSMUSG00000018909	protein_coding	ENSMUSG00000018909	Arrb1	ensembl_havana	16	ensembl | ensembl_havana | havana	3506.87	3864	2881.33	4667.33	2996.1	4311.44	4570.41	3424.88	5717.55	5987.93	6892.64	4864.26	3444.99	3611.8	4138.3
11	70344809	70350811	6002	-	ENSMUSG00000018920	protein_coding	ENSMUSG00000018920	Cxcl16	ensembl_havana	12	ensembl_havana | havana	182.202	838.293	167.014	90.1583	189.948	214.509	125.965	16.7495	29.4786	33.3938	24.5582	17.246	5.28777	11.4576	16.9685
11	70283709	70300858	17149	-	ENSMUSG00000018921	protein_coding	ENSMUSG00000018921	Pelp1	ensembl_havana	12	ensembl_havana | havana	538.74	447.306	578.794	652.207	578.738	593.278	693.445	168.732	318.905	355.852	327.443	1523.1	1294.62	1088.48	980.259
11	70342745	70344554	1809	+	ENSMUSG00000018923	protein_coding	ENSMUSG00000018923	Med11	ensembl_havana	14	ensembl_havana | havana	611.847	737.747	632.873	471.931	505.933	476.779	642.55	130.139	312.205	323.503	283.783	386.674	458.273	321.695	317.182
11	70234978	70242858	7880	-	ENSMUSG00000018924	protein_coding	ENSMUSG00000018924	Alox15	ensembl_havana	7	ensembl_havana | havana	93.3517	14.706	40.5578	22.6526	20.9777	10.7869	6.36188	905.586	1293.04	1602.9	1558.08	726.148	249.406	517.356	495.351
11	83478708	83483914	5206	-	ENSMUSG00000018927	protein_coding	ENSMUSG00000018927	Ccl6	ensembl_havana	4	ensembl_havana | havana	7493.9	5796.45	5191.48	6546.51	5884.96	7857.38	7385.94	2481.62	5212.35	3691	4162.61	264.137	503.22	543.798	398.108
11	83553410	83555510	2100	+	ENSMUSG00000018930	protein_coding	ENSMUSG00000018930	Ccl4	ensembl_havana	4	ensembl_havana	80.9798	71.0788	31.2633	30.2035	55.5292	16.1803	8.90663	26.0277	22.7789	39.6551	27.2869	404.828	321.673	579.051	214.717
11	60793072	60805577	12505	-	ENSMUSG00000018931	protein_coding	ENSMUSG00000018931	Natd1	ensembl_havana	4	ensembl_havana | havana	320.545	297.795	250.951	303.923	190.033	316.055	291.374	137.319	321.585	325.589	442.048	183.352	141.007	142.78	195.138
11	60822859	60843638	20779	+	ENSMUSG00000018932	protein_coding	ENSMUSG00000018932	Map2k3	ensembl_havana	10	ensembl_havana | havana	1143.85	888.486	1193.93	844.751	1327.77	845.686	1488.67	533.12	885.698	861.977	1077.84	1246.25	687.406	631.934	995.912
5	33176160	33185311	9151	+	ENSMUSG00000018965	protein_coding	ENSMUSG00000018965	Ywhah	ensembl_havana	12	ensembl_havana | havana	3578.47	3222.9	2848.91	3811.46	3433.79	3986.46	4041.48	1481.6	3477.87	3122.39	3176.76	2525.4	3659.57	3068.57	2941.79
5	113880507	113910572	30065	-	ENSMUSG00000018974	protein_coding	ENSMUSG00000018974	Sart3	ensembl_havana	8	ensembl_havana | havana	1395.78	942.41	1317.28	1333.68	1031.61	1208.12	1249.48	396.698	667.287	753.448	732.653	2513.41	1706.2	1478.9	1489.3
4	135899705	135923369	23664	+	ENSMUSG00000018983	protein_coding	ENSMUSG00000018983	E2f2	ensembl_havana	10	ensembl_havana | havana	3874.65	2888.49	4109.01	3608.38	4828.57	4033.21	5875.83	3759.67	6964.99	7637.8	7835.43	1592.99	738.525	750.916	907.164
11	83082156	83105981	23825	+	ENSMUSG00000018986	protein_coding	ENSMUSG00000018986	Slfn3	ensembl_havana	11	ensembl_havana | havana	544.43	215.46	450.178	508.717	386.502	523.897	519.977	130.553	290.721	262.673	279.643	521.11	360.872	350.582	461.848
7	96600712	96713966	113254	+	ENSMUSG00000018995	protein_coding	ENSMUSG00000018995	Nars2	ensembl_havana	13	ensembl_havana | havana	146.174	148.285	129.087	150.048	155.482	145.533	176.86	101.418	112.555	144.011	144.621	265.952	400.989	346.278	366.685
6	34130315	34154047	23732	-	ENSMUSG00000018999	protein_coding	ENSMUSG00000018999	Slc35b4	ensembl_havana	15	ensembl_havana | havana	756.307	639.419	659.37	811.286	537.263	805.651	928.556	158.291	431.903	385.835	478.954	775.875	948.907	999.17	984.48
9	108447085	108449974	2889	+	ENSMUSG00000019039	protein_coding	ENSMUSG00000019039	Dalrd3	ensembl_havana	15	ensembl_havana | havana	475.649	522.039	466.444	531.582	527.645	452.999	539.039	221.78	284.767	333.71	302.064	673.17	833.836	726.216	752.591
5	136982129	136995089	12960	+	ENSMUSG00000019054	protein_coding	ENSMUSG00000019054	Fis1	ensembl_havana	14	ensembl_havana | havana	2376.52	2299.04	2221.38	2500.29	2274.22	2319.17	3366.69	810.449	1946.92	1696.81	1473.5	1204.49	1747.6	1358.17	1146.68
4	147994210	148021225	27015	-	ENSMUSG00000019055	protein_coding	ENSMUSG00000019055	Plod1	ensembl_havana	16	ensembl_havana | havana	429.642	379.904	333.757	358.667	570.1	460.599	619.647	113.086	269.327	261.932	297.427	251.429	266.151	194.78	183.391
9	21818787	21829489	10702	-	ENSMUSG00000019066	protein_coding	ENSMUSG00000019066	Rab3d	ensembl_havana	14	ensembl_havana | havana	3401.24	3261.04	3485.52	4250.29	4388.04	3616.89	6468.91	1695.37	4072.14	3120.19	2483.11	1205.41	950.916	1056.75	866.706
15	76585665	76588440	2775	+	ENSMUSG00000019080	protein_coding	ENSMUSG00000019080	Mfsd3	ensembl_havana	9	ensembl_havana | havana	130.187	98.2462	116.208	92.6327	90.5425	83.0327	112.21	10.7414	35.7104	43.4633	22.8802	167.442	153.606	112.465	117.17
7	141009657	141017806	8149	-	ENSMUSG00000019082	protein_coding	ENSMUSG00000019082	Slc25a22	ensembl_havana	19	ensembl_havana | havana	452.137	281.864	496.833	422.849	303.56	588.964	372.806	62.8256	184.911	153.403	207.38	501.95	561.386	460.068	402.676
X	73340703	73348328	7625	+	ENSMUSG00000019087	protein_coding	ENSMUSG00000019087	Atp6ap1	ensembl_havana	14	ensembl_havana | havana	4079.47	4038.06	3370.57	4301.27	4181.92	4088.15	5067.78	1542.82	3033.63	2830.09	2554.06	1635.64	2457.04	2073.85	2187.62
X	73316823	73325944	9121	-	ENSMUSG00000019088	protein_coding	ENSMUSG00000019088	Dnase1l1	ensembl_havana	15	ensembl | havana	688.326	753.682	495.143	635.219	355.388	583.568	667.997	93.3409	253.248	190.971	195.101	144.322	139.245	131.322	105.074
11	83463745	83469463	5718	-	ENSMUSG00000019122	protein_coding	ENSMUSG00000019122	Ccl9	ensembl_havana	9	ensembl_havana | havana	7874.14	4546.59	5204.88	5199.73	3289.79	5951.08	6682.49	807.756	1626.68	1126	1232	1290.73	2762.85	2441.36	1749.07
13	24985640	25000181	14541	+	ENSMUSG00000019132	protein_coding	ENSMUSG00000019132	BC005537	ensembl_havana	12	ensembl_havana | havana	9702.87	6024.54	8307.54	8689.17	6440.16	8546.48	10428.4	2099.27	4294.5	4050.04	5079.45	6667.86	4880.61	5589.56	6884.08
8	71047023	71049941	2918	+	ENSMUSG00000019139	protein_coding	ENSMUSG00000019139	Isyna1	ensembl_havana	11	ensembl | havana	697.327	1082.12	910.018	890.057	943.998	780.97	851.221	288.1	493.097	502.993	476.157	1412.35	1990.84	1599.66	1313.76
18	36916061	36925616	9555	+	ENSMUSG00000019143	protein_coding	ENSMUSG00000019143	Hars2	ensembl_havana	16	ensembl_havana | havana	460.513	547.244	552.023	453.585	352.067	450.861	456.569	139.272	343.058	277.859	235.043	624.099	671.201	654.338	559.205
7	16186704	16189420	2716	+	ENSMUSG00000019158	protein_coding	ENSMUSG00000019158	Tmem160	ensembl_havana	10	ensembl_havana | havana	759.185	578.434	808.622	445.5	566.4	409.901	680.721	90.6484	225.109	157.577	162.357	484.706	473.256	383.39	357.644
11	100605835	100629042	23207	-	ENSMUSG00000019173	protein_coding	ENSMUSG00000019173	Rab5c	ensembl_havana	12	ensembl_havana | havana	3914.14	3941.11	3544.43	4138.8	5034.77	3993.19	5652.03	1484.5	3576.28	3142.08	2781.95	2217.46	3265.97	2728.67	2426.54
5	135807334	135819253	11919	+	ENSMUSG00000019179	protein_coding	ENSMUSG00000019179	Mdh2	ensembl_havana	11	ensembl_havana | havana	2161.73	2163	2433.47	2084.07	2289	1819.75	3310.72	850.841	1668.21	1627.96	1454.4	4631.9	3438.91	2638.79	2566.81
2	152511381	152550591	39210	+	ENSMUSG00000019188	protein_coding	ENSMUSG00000019188	H13	ensembl_havana	17	ensembl_havana | havana	4304.32	3464.46	4038.04	4243.6	3884.54	4548.84	4678.53	783.525	1727.18	1478.71	1664.5	3440.13	3177.07	2712.81	2788.71
11	44409791	44456348	46557	+	ENSMUSG00000019189	protein_coding	ENSMUSG00000019189	Rnf145	ensembl_havana	14	ensembl_havana | havana	1520.62	1857.85	1294.47	1348.77	1461.04	1365.62	1787.69	900.202	1670.9	1606.03	1772.29	1590.26	1150.97	1123.73	1107.52
7	30815949	30826429	10480	-	ENSMUSG00000019194	protein_coding	ENSMUSG00000019194	Scn1b	ensembl_havana	16	ensembl_havana | havana	10.1225	23.2844	9.29449	5.66316	23.4457	10.7869	10.179	10.7701	10.7195	17.7404	9.55041	9.98454	3.52518	7.05085	8.48427
6	120771266	120799755	28489	-	ENSMUSG00000019210	protein_coding	ENSMUSG00000019210	Atp6v1e1	ensembl_havana	11	ensembl_havana | havana	1891.79	1816.18	1608.78	2029.31	2276.72	1514.47	2533.32	906.485	2311.39	1848.14	1660.41	1066.53	1338.7	1039.12	1100.99
17	25937900	25946394	8494	-	ENSMUSG00000019214	protein_coding	ENSMUSG00000019214	Chtf18	ensembl_havana	15	ensembl_havana | havana	501.441	261.514	531.713	586.901	396.109	408.516	483.075	221.684	368.107	465.071	395.804	1193.42	933.644	851.285	802.071
12	85182023	85198039	16016	-	ENSMUSG00000019235	protein_coding	ENSMUSG00000019235	Rps6kl1	ensembl_havana	10	ensembl_havana | havana	30.3674	39.2159	32.1082	40.586	28.3816	44.2261	45.8055	22.4377	52.2575	20.8711	25.9225	23.5998	24.6763	35.2543	25.4528
7	4484519	4504680	20161	-	ENSMUSG00000019254	protein_coding	ENSMUSG00000019254	Ppp1r12c	ensembl_havana	17	ensembl_havana | havana	2391.15	2699.76	2334.61	2470.07	2488.93	2643.86	2864.1	872.38	1441.77	1431.76	1371.17	1962.43	1700.89	1593.5	1273.94
12	35547973	35585038	37065	-	ENSMUSG00000019256	protein_coding	ENSMUSG00000019256	Ahr	ensembl_havana	18	ensembl_havana | havana	576.981	996.33	405.577	594.632	467.679	669.865	725.254	74.4932	166.152	150.272	173.272	76.2456	113.687	74.0339	123.348
8	71358576	71370174	11598	+	ENSMUSG00000019261	protein_coding	ENSMUSG00000019261	Map1s	ensembl_havana	4	ensembl_havana | havana	982.999	926.477	1066.33	1042.02	963.736	1010.73	1174.4	245.918	353.744	376.723	377.923	1810.81	1265.53	1228.61	1061.84
5	33810560	33815761	5201	-	ENSMUSG00000019295	protein_coding	ENSMUSG00000019295	Tmem129	ensembl_havana	9	ensembl_havana | havana	341.174	405.106	392.163	382.271	364.067	424.496	445.051	185.108	359.864	304.713	383.641	411.895	542.895	416.715	392.209
14	55983150	55992958	9808	+	ENSMUSG00000019297	protein_coding	ENSMUSG00000019297	Nop9	ensembl_havana	10	ensembl_havana | havana	917.655	804.96	852.347	965.358	808.19	738.841	1050.98	220.719	478.141	533.077	417.49	1332.1	1640.06	1409.98	1278.4
11	100969237	100971354	2117	+	ENSMUSG00000019301	protein_coding	ENSMUSG00000019301	Hsd17b1	ensembl_havana	6	ensembl_havana	12.3719	22.0589	9.29449	37.7544	25.9136	10.7869	34.3542	16.1551	38.8582	9.392	6.82172	50.8304	48.4712	58.1695	40.4634
11	100900278	100954546	54268	+	ENSMUSG00000019302	protein_coding	ENSMUSG00000019302	Atp6v0a1	ensembl_havana	17	ensembl | ensembl_havana | havana	1105.6	1072.31	1002.96	1059.95	1056.29	1060.35	1690.99	657.874	1271.6	1456.8	1439.38	1602.97	967.662	1094.65	1180.61
11	100982649	100986263	3614	-	ENSMUSG00000019303	protein_coding	ENSMUSG00000019303	Psmc3ip	ensembl_havana	15	ensembl_havana | havana	142.022	112.619	174.597	212.2	148.727	131.783	161.464	89.0737	155.198	155.675	122.03	289.172	321.524	256.276	277.462
17	24915208	24919504	4296	+	ENSMUSG00000019320	protein_coding	ENSMUSG00000019320	Noxo1	ensembl_havana	15	ensembl_havana | havana	26.0315	13.1785	20.3897	21.2273	20.2956	21.2096	20.071	6.13899	12.6871	8.54643	9.3052	16.6157	13.3184	21.4989	24.5576
3	94913901	94922760	8859	-	ENSMUSG00000019338	protein_coding	ENSMUSG00000019338	Zfp687	ensembl_havana	14	ensembl_havana | havana	863.072	1146.41	1115.79	1048.02	890.387	958.945	1074.89	349.563	655.759	671.616	691.9	1678.41	967.368	1114.72	1027.35
X	99773479	99782502	9023	+	ENSMUSG00000019359	protein_coding	ENSMUSG00000019359	Gdpd2	ensembl_havana	15	ensembl_havana | havana	14.9325	3.67649	28.4207	41.1043	8.75365	45.3048	31.8094	39.9483	74.4303	66.4984	72.2247	47.7664	5.28777	7.93221	4.36281
8	84972867	84976349	3482	-	ENSMUSG00000019362	protein_coding	ENSMUSG00000019362	D8Ertd738e	ensembl_havana	9	ensembl_havana	1038.12	971.818	1134.77	975.951	979.782	1033.38	1374.17	325.796	719.546	563.52	604.405	955.793	919.19	676.882	745.31
7	16649304	16658040	8736	-	ENSMUSG00000019370	protein_coding	ENSMUSG00000019370	Calm3	ensembl_havana	11	ensembl_havana | havana	6243.24	5156.62	5576.57	6942.88	7147.04	5246.2	7247.07	3634.86	5754.63	5384.71	4878.11	7492.82	9326.2	7217.21	7313.98
11	59708621	59730665	22044	-	ENSMUSG00000019373	protein_coding	ENSMUSG00000019373	Cops3	ensembl_havana	12	ensembl_havana | havana	1146.66	835.426	990.358	1320.34	1156.83	942.32	1213.23	434.31	814.232	828.471	670.727	1054.23	2284.68	1672.34	1802.82
8	70980374	70987979	7605	+	ENSMUSG00000019428	protein_coding	ENSMUSG00000019428	Fkbp8	ensembl_havana	17	ensembl_havana | havana	4042.2	3802.73	4379.25	3892.46	4016.62	3593.12	4436.79	1379.47	2661.12	2317.72	2281.19	4358.7	4286.66	3445.22	3092.84
17	35460722	35472684	11962	+	ENSMUSG00000019432	protein_coding	ENSMUSG00000019432	Ddx39b	ensembl_havana	16	ensembl_havana | havana	3747.56	3751.26	3768.53	4783.45	3426.8	3953.41	4226.79	1267.28	2440.01	2670.49	2379.42	7237.06	7301.63	6498.27	5254.58
8	84379306	84391324	12018	+	ENSMUSG00000019433	protein_coding	ENSMUSG00000019433	Gipc1	ensembl_havana	10	ensembl_havana | havana	826.669	700.984	761.303	861.744	790.983	677.415	1049.71	202.837	499.796	468.556	328.807	774.256	683.885	637.221	576.93
11	78067537	78072736	5199	+	ENSMUSG00000019437	protein_coding	ENSMUSG00000019437	Tlcd1	ensembl_havana	18	ensembl_havana | havana	113.98	99.7872	79.4035	99.6367	91.3288	73.5244	80.2667	160.637	240.579	308.878	420.504	233.231	204.999	245.893	258.074
11	69737202	69742885	5683	+	ENSMUSG00000019461	protein_coding	ENSMUSG00000019461	Plscr3	ensembl_havana	13	ensembl | ensembl_havana | havana	481.379	474.268	754.265	646.546	436.831	505.904	656.544	165.314	382.97	365.298	343.234	951.891	1136.35	1029.05	863.948
8	84393307	84399383	6076	+	ENSMUSG00000019464	protein_coding	ENSMUSG00000019464	Ptger1	ensembl_havana	7	ensembl_havana | havana	299.012	482.882	288.878	403.579	259.534	388.674	416.069	86.3453	184.068	200.93	236.945	232.518	188.956	200.361	224.315
10	127018394	127025953	7559	-	ENSMUSG00000019467	protein_coding	ENSMUSG00000019467	Arhgef25	ensembl_havana	16	ensembl_havana | havana	3.37416	9.80397	12.6743	19.8211	30.8496	7.55081	1.27238	28.7203	20.099	35.4809	35.473	269.583	207.986	193.898	311.96
8	3658421	3671317	12896	-	ENSMUSG00000019470	protein_coding	ENSMUSG00000019470	Xab2	ensembl_havana	13	ensembl_havana | havana	1512.7	1676.27	1415.31	1784.09	1502.51	1463.88	1630.94	537.342	899.1	1003.43	856.41	1912.12	1852.4	1748.17	1522.91
9	21044518	21061279	16761	-	ENSMUSG00000019471	protein_coding	ENSMUSG00000019471	Cdc37	ensembl_havana	11	ensembl_havana | havana	2923.16	2769.62	2971.69	3143.07	2741.91	2658.97	3118.59	954.053	1749.96	1661.34	1420.28	6619.77	4847.19	3601.23	3624.72
8	124532724	124562027	29303	+	ENSMUSG00000019478	protein_coding	ENSMUSG00000019478	Rab4a	ensembl_havana	18	ensembl_havana | havana	15.7461	22.0589	27.0385	22.6526	32.0835	20.495	8.90663	20.6427	41.538	45.9164	39.566	240.537	409.801	332.271	335.455
17	57556455	57570666	14211	+	ENSMUSG00000019487	protein_coding	ENSMUSG00000019487	Trip10	ensembl_havana	12	ensembl_havana | havana	175.456	188.726	190.959	223.694	177.694	201.714	201.035	26.0277	71.0166	51.1342	77.7676	186.983	220.324	144.542	144.233
5	138159333	138162909	3576	+	ENSMUSG00000019494	protein_coding	ENSMUSG00000019494	Cops6	ensembl_havana	15	ensembl_havana | havana	690.577	602.943	539.081	615.398	618.226	517.77	1056.07	177.707	379.202	419.509	312.435	531.904	961.489	636.339	692.445
11	62441997	62444040	2043	+	ENSMUSG00000019505	protein_coding	ENSMUSG00000019505	Ubb	ensembl_havana	8	ensembl_havana | havana	23723.3	21606.7	22231	24688.2	23718.2	22402	29932.6	10855.6	24592.5	23445.1	23077	20619.8	22663.2	17493.7	15330.3
5	138170264	138178692	8428	+	ENSMUSG00000019518	protein_coding	ENSMUSG00000019518	Ap4m1	ensembl_havana	12	ensembl_havana | havana	1054.4	834.06	915.514	1185.46	683.241	1189.36	882.455	228.273	498.82	413.054	455.551	1307.44	1124.69	1097.77	923.387
3	20176248	20209482	33234	-	ENSMUSG00000019528	protein_coding	ENSMUSG00000019528	Gyg	ensembl_havana	19	ensembl | havana	2483.42	1816.19	1419.53	1893.36	3488.49	2391.46	4142.82	621.971	1764.69	1621.7	1315.22	717.07	1202.08	992.404	991.344
7	44732337	44741646	9309	-	ENSMUSG00000019539	protein_coding	ENSMUSG00000019539	Rcn3	ensembl_havana	12	ensembl_havana | havana	216.392	242.188	182.51	199.154	62.9331	161.803	80.1595	54.7474	97.8154	60.5262	68.2172	310.428	234.32	262.993	162.506
X	72716756	72726109	9353	+	ENSMUSG00000019558	protein_coding	ENSMUSG00000019558	Slc6a8	ensembl_havana	15	ensembl | ensembl_havana | havana	20.2449	18.3824	27.0385	17.9333	23.4457	17.259	5.0895	12.5651	14.7393	17.7404	31.3799	15.4307	22.9137	35.2543	37.2002
10	79762877	79790853	27976	+	ENSMUSG00000019564	protein_coding	ENSMUSG00000019564	Arid3a	ensembl_havana	13	ensembl_havana | havana	3058.13	2661.75	3075.61	3890.51	4507.67	3624.41	6127.56	2005.03	3678.1	3264.27	3395.82	1765.47	1576.62	1205.7	1232.82
17	56374045	56382029	7984	-	ENSMUSG00000019578	protein_coding	ENSMUSG00000019578	Ubxn6	ensembl_havana	12	ensembl_havana | havana	903.038	860.956	961.616	899.66	844.624	872.97	1189.76	248.052	527.621	397.402	396.399	780.071	679.365	605.118	612.624
17	56482744	56490921	8177	-	ENSMUSG00000019579	protein_coding	ENSMUSG00000019579	Mydgf	ensembl_havana	14	ensembl_havana | havana	911.022	778.19	833.97	988.221	879.83	834.903	1005.18	196.554	434.139	437.25	376.559	1208.13	1485.86	1110.51	1002.45
11	105824528	105844163	19635	-	ENSMUSG00000019590	protein_coding	ENSMUSG00000019590	Cyb561	ensembl_havana	17	ensembl_havana | havana	8.99775	39.2159	33.7982	26.4281	56.6639	28.0459	25.4475	19.7452	26.7987	33.3938	25.9225	62.6303	58.1655	67.8644	52.2109
9	110485571	110540675	55104	+	ENSMUSG00000019659	protein_coding	ENSMUSG00000019659	Ccdc12	ensembl_havana	9	ensembl_havana | havana	1365	1642.07	1568.16	1463.5	894.025	1687.85	1684.2	359.224	766.841	637.599	541.378	1000.51	862.054	648.552	607.385
6	38510437	38516385	5948	+	ENSMUSG00000019689	protein_coding	ENSMUSG00000019689	Fmc1	ensembl_havana	5	ensembl_havana | havana	167.583	151.961	191.805	251.067	165.354	152.095	239.207	35.0028	108.535	96.0071	94.1398	152.491	394.82	300.543	203.622
1	176847639	177085770	238131	-	ENSMUSG00000019699	protein_coding	ENSMUSG00000019699	Akt3	ensembl_havana	17	ensembl | havana	1463.26	1446.07	1139.84	1738.58	818.13	1531.74	1078.97	312.333	588.233	432.033	607.133	821.459	1066.37	886.643	919.562
3	87826813	87830980	4167	+	ENSMUSG00000019710	protein_coding	ENSMUSG00000019710	Mrpl24	ensembl_havana	14	ensembl_havana | havana	1253.68	1021.31	1321.59	1128.73	984.464	1295.8	1183.4	321.898	642.851	581.049	642.494	1321.63	1477.47	1211.26	1219.15
2	29825438	29850384	24946	+	ENSMUSG00000019715	protein_coding	ENSMUSG00000019715	Gle1	ensembl_havana	15	ensembl_havana | havana	1008.87	748.778	971.699	1087.32	937.827	1052.78	1075.13	359.004	637.809	658.484	720.374	1560.58	1521.12	1322.91	1429.91
13	13764982	13953389	188407	+	ENSMUSG00000019726	protein_coding	ENSMUSG00000019726	Lyst	ensembl_havana	13	ensembl_havana | havana	11427.2	12061.6	10283.3	11735.9	16441.2	14161.4	18280.2	5437.92	10151.4	10028.7	10446.8	3770.48	1945.02	2846.8	2970.82
8	73234485	73246459	11974	-	ENSMUSG00000019731	protein_coding	ENSMUSG00000019731	Slc35e1	ensembl_havana	14	ensembl_havana | havana	3330.29	3207.13	3192.23	3304.45	4243.65	3308.34	5182.39	1557.18	3214.51	2681.94	2630.45	1617.5	1695.61	1413.69	1631.59
7	3668789	3680553	11764	-	ENSMUSG00000019734	protein_coding	ENSMUSG00000019734	Tmc4	ensembl_havana	17	ensembl_havana | havana	107.234	147.059	161.841	129.331	163.864	143.043	128.471	52.3041	93.8559	108.904	120.862	81.6917	79.2709	91.8259	74.2279
7	29931373	29932816	1443	+	ENSMUSG00000019738	protein_coding	ENSMUSG00000019738	Polr2i	ensembl_havana	16	ensembl_havana | havana	248.732	203.081	255.421	275.418	247.454	247.429	286.131	78.6392	136.732	146.266	159.28	204.408	363.047	265.627	248.547
10	4351915	4382389	30474	-	ENSMUSG00000019763	protein_coding	ENSMUSG00000019763	Rmnd1	ensembl_havana	12	ensembl_havana | havana	391.741	343.636	243.604	437.199	274.623	331.78	305.003	137.7	226.487	196.279	186.187	380.997	625.348	519.923	595.758
10	4561593	4955615	394022	+	ENSMUSG00000019768	protein_coding	ENSMUSG00000019768	Esr1	ensembl_havana	17	ensembl_havana | havana	230.567	209.56	354.036	500.246	270.242	317.134	388.074	130.139	167.492	166.969	208.745	344.92	530.539	502.373	392.233
10	5749160	5755601	6441	-	ENSMUSG00000019773	protein_coding	ENSMUSG00000019773	Fbxo5	ensembl_havana	8	ensembl_havana | havana	945.678	536.767	712.296	1207.08	795.919	978.369	1001.15	786.999	1445.36	1456.38	1729.99	716.952	1288.45	968.413	960.207
10	5761887	5773911	12024	-	ENSMUSG00000019774	protein_coding	ENSMUSG00000019774	Mtrf1l	ensembl_havana	9	ensembl_havana | havana	215.946	176.471	179.975	158.568	172.758	212.501	147.596	85.2633	168.832	89.7458	155.535	234.183	274.964	238.848	252.57
10	36850540	36877886	27346	+	ENSMUSG00000019777	protein_coding	ENSMUSG00000019777	Hdac2	ensembl_havana	17	ensembl_havana | havana	1158.46	887.259	1019.85	1425.23	1019.27	879.132	1109.51	574.405	896.416	976.772	864.995	2164.82	2957.65	2360.27	2539.43
10	33872551	33895621	23070	-	ENSMUSG00000019782	protein_coding	ENSMUSG00000019782	Rwdd1	ensembl_havana	11	ensembl_havana | havana	765.646	384.289	509.64	519.505	483.951	486.821	528.11	157.064	299.623	272.412	237.392	363.806	555.046	428.194	543.458
10	9631291	9776824	145533	-	ENSMUSG00000019790	protein_coding	ENSMUSG00000019790	Stxbp5	ensembl_havana	18	ensembl_havana | havana	1519.49	1844.38	1754.98	2227.51	3318.2	1760.42	2749.61	1058.16	2082.25	2031.8	2068.34	2321.88	2405.95	2350.57	2380.82
10	30484137	30505629	21492	-	ENSMUSG00000019791	protein_coding	ENSMUSG00000019791	Hint3	ensembl_havana	13	ensembl_havana | havana	151.837	254.903	150.402	158.568	132.036	148.859	128.51	41.2854	76.3764	84.528	75.039	111.645	108.399	87.2543	101.811
10	30410221	30476746	66525	-	ENSMUSG00000019792	protein_coding	ENSMUSG00000019792	Trmt11	ensembl_havana	9	ensembl_havana | havana	219.32	257.354	234.897	247.291	161.652	174.747	187.039	113.984	128.634	149.229	124.155	363.982	456.511	363.119	407.896
10	7601764	7638915	37151	+	ENSMUSG00000019794	protein_coding	ENSMUSG00000019794	Katna1	ensembl_havana	14	ensembl | havana	654.587	598.028	572.034	710.727	726.713	734.576	796.507	287.912	604.311	533.234	517.027	629.933	783.471	635.458	636.319
10	7505137	7556901	51764	-	ENSMUSG00000019795	protein_coding	ENSMUSG00000019795	Pcmt1	ensembl_havana	18	ensembl_havana | havana	1014.49	980.395	953.108	1253.45	1135.26	1228.62	1273.65	530.427	1185.84	1043.56	1206.08	995.729	1544.03	1103.46	1036.39
10	7465564	7501248	35684	+	ENSMUSG00000019796	protein_coding	ENSMUSG00000019796	Lrp11	ensembl_havana	13	ensembl_havana | havana	6.74832	7.35298	9.29449	17.9333	19.7437	16.1803	13.9961	10.7701	14.7393	12.5227	13.6434	23.5998	38.777	50.2373	52.2109
10	43401129	43416991	15862	-	ENSMUSG00000019797	protein_coding	ENSMUSG00000019797	Mtres1	ensembl_havana	12	ensembl_havana | havana	204.699	115.197	130.123	148.186	159.184	103.554	134.872	87.0583	120.594	123.14	87.3181	196.06	232.662	184.204	304.128
10	42637492	42708511	71019	+	ENSMUSG00000019802	protein_coding	ENSMUSG00000019802	Sec63	ensembl_havana	14	ensembl_havana | havana	1449.76	1436.29	1190.55	1580.02	1409.21	1323.54	1369.08	486.449	887.04	861.977	884.095	1549.41	1344.86	1470.11	1546.75
10	42378026	42411378	33352	+	ENSMUSG00000019804	protein_coding	ENSMUSG00000019804	Snx3	ensembl_havana	13	ensembl_havana | havana	1556.62	1794.12	1177.86	1704.6	1585.67	1526.34	1956.9	670.443	1500.72	1301.31	1368.44	1445.93	2143.3	1490.37	1545.48
10	13522798	13744725	221927	-	ENSMUSG00000019806	protein_coding	ENSMUSG00000019806	Aig1	ensembl_havana	14	ensembl_havana | havana	215.946	148.285	127.588	151.017	227.053	143.465	202.308	65.5181	72.3566	55.3084	75.0389	196.06	240.593	206.237	219.286
10	13428638	13439121	10483	+	ENSMUSG00000019808	protein_coding	ENSMUSG00000019808	Adat2	ensembl_havana	9	ensembl_havana	156.611	150.736	125.978	166.116	108.362	92.3813	108.261	27.3131	43.162	49.9261	41.6241	115.985	133.943	95.6129	110.198
10	13399586	13428887	29301	-	ENSMUSG00000019809	protein_coding	ENSMUSG00000019809	Pex3	ensembl_havana	17	ensembl | ensembl_havana | havana	522.718	469.364	399.583	544.613	424.717	404.893	435.043	137.828	250.284	264.184	184.857	267.966	370.158	375.031	390.373
10	13375284	13394780	19496	+	ENSMUSG00000019810	protein_coding	ENSMUSG00000019810	Fuca2	ensembl_havana	16	ensembl_havana | havana	2518.25	1795.36	1774.4	2075.56	1979.3	1911.44	2077.77	569.02	1128.22	932.937	749.025	1059.26	1368.66	1040.88	1243.27
[truncated: 13,993 more rows]

## Sheet: Dseq2Norm_GM10_7AMLvs4WTBM_rnk
#	Fold change (AML(NN1/FLT3ITD) vs. WT whole BM)
XIST	416.635
RNASE2A	69.3673
PDCD1	37.081
GZMK	31.8688
TIGIT	28.6652
GM47283	24.7265
TLR11	24.714
BATF3	24.7065
CACNB3	21.275
[truncated: 4,047 more rows]

## Sheet: Dseq2Norm_GM10_7AMLvs4WTLN_rnk
#	Fold change (AML(NN1/FLT3ITD) vs. WT Lin neg)
[truncated: 4,600 more rows]

[truncated: 2 more sheets: Dseq2&FPKMNorm_7AMLvs4WTBM, Dseq2&FPKMNorm_7AMLvs4WTLNBM]
